# Supplementary material for: Identification of TGF-β-related genes in cardiac hypertrophy and heart failure based on single cell RNA sequencing
Source: publisher site journal article supplement (doi:10.18632/aging.204901), 2023-07-26
Supplement: Supplementary file [file aging-v15i14-204901-supplementary-material-SD3.pdf]

**Supplementary Table 2. Cell markers used for cell annotation.**

| <b>Gene</b> | <b>Cell type</b>  |
|-------------|-------------------|
| CD79A       | B cells           |
| CD79B       | B cells           |
| IGHD        | B cells           |
| IGHM        | B cells           |
| MS4A1       | B cells           |
| ACTC1       | Cardiomyocytes    |
| COX6A2      | Cardiomyocytes    |
| CRYAB       | Cardiomyocytes    |
| DES         | Cardiomyocytes    |
| MYBPC3      | Cardiomyocytes    |
| MYH7        | Cardiomyocytes    |
| MYH7B       | Cardiomyocytes    |
| MYL3        | Cardiomyocytes    |
| PLN         | Cardiomyocytes    |
| TNNI3       | Cardiomyocytes    |
| TNNT2       | Cardiomyocytes    |
| TPM1        | Cardiomyocytes    |
| AQP1        | Endocardial cells |
| CLU         | Endocardial cells |
| CYP1B1      | Endocardial cells |
| EMCN        | Endocardial cells |
| NPR3        | Endocardial cells |
| RAMP2       | Endocardial cells |
| VWF         | Endocardial cells |
| AQP1        | Endothelial cells |
| CLDN5       | Endothelial cells |
| FABP4       | Endothelial cells |
| FABP5       | Endothelial cells |
| PECAM1      | Endothelial cells |
| RAMP2       | Endothelial cells |
| RGCC        | Endothelial cells |
| VWF         | Endothelial cells |
| C1R         | Fibroblasts       |
| COL1A1      | Fibroblasts       |
| COL6A3      | Fibroblasts       |
| DCN         | Fibroblasts       |
| EFEMP1      | Fibroblasts       |
| FBLN1       | Fibroblasts       |
| FBN1        | Fibroblasts       |
| IGF1        | Fibroblasts       |
| LUM         | Fibroblasts       |
| MGST1       | Fibroblasts       |
| SCN7A       | Fibroblasts       |
| SERPINF1    | Fibroblasts       |
| AIF1        | Myeloid cells     |
| C1QB        | Myeloid cells     |
| C1QC        | Myeloid cells     |
| CXCL8       | Myeloid cells     |
| HLA-DRB1    | Myeloid cells     |
| IL1B        | Myeloid cells     |

|        |                     |
|--------|---------------------|
| ITGAX  | Myeloid cells       |
| LYZ    | Myeloid cells       |
| S100A9 | Myeloid cells       |
| SCN7A  | Neuron              |
| CD247  | NK                  |
| CLIC3  | NK                  |
| FCGR3A | NK                  |
| GNLY   | NK                  |
| KLRB1  | NK                  |
| KLRF1  | NK                  |
| PRF1   | NK                  |
| PTPRC  | NK                  |
| SPON2  | NK                  |
| TRDC   | NK                  |
| ABCC9  | Pericytes           |
| CALD1  | Pericytes           |
| CD36   | Pericytes           |
| CPE    | Pericytes           |
| IGFBP7 | Pericytes           |
| KCNJ8  | Pericytes           |
| LHFP   | Pericytes           |
| NOTCH3 | Pericytes           |
| PDGFRB | Pericytes           |
| RGS5   | Pericytes           |
| STEAP4 | Pericytes           |
| ACTA2  | Smooth muscle cells |
| CALD1  | Smooth muscle cells |
| IGFBP5 | Smooth muscle cells |
| IGFBP7 | Smooth muscle cells |
| LHFP   | Smooth muscle cells |
| MYH11  | Smooth muscle cells |
| PDGFRB | Smooth muscle cells |
| TAGLN  | Smooth muscle cells |
| TAGLN  | Smooth muscle cells |
| TPM1   | Smooth muscle cells |
| TPM2   | Smooth muscle cells |
| CD3D   | T cells             |
| CD3E   | T cells             |
| CD3G   | T cells             |
| IL7R   | T cells             |
| PTPRC  | T cells             |
| TRAC   | T cells             |
| TRBC2  | T cells             |

---

**Supplementary Table 3. Top five DEGs for cell clusters.**

| Gene     | p_val                 | avg_log2FC       | pct.1 | pct.2 | p_val_adj             | Cluster |
|----------|-----------------------|------------------|-------|-------|-----------------------|---------|
| DCN      | 0                     | 4.86033225383683 | 0.943 | 0.14  | 0                     | 0       |
| ACSM3    | 0                     | 4.84943856649452 | 0.653 | 0.036 | 0                     | 0       |
| NEGR1    | 0                     | 4.3807661059158  | 0.774 | 0.035 | 0                     | 0       |
| LUM      | 0                     | 4.17344564299228 | 0.494 | 0.042 | 0                     | 0       |
| CDH19    | 0                     | 3.92780518891926 | 0.737 | 0.018 | 0                     | 0       |
| RYR2     | 0                     | 6.41775782329685 | 0.991 | 0.11  | 0                     | 1       |
| TTN      | 0                     | 5.68238251857937 | 0.998 | 0.195 | 0                     | 1       |
| FGF12    | 0                     | 4.96914952486419 | 0.93  | 0.054 | 0                     | 1       |
| CTNNA3   | 0                     | 4.95286939204842 | 0.96  | 0.055 | 0                     | 1       |
| DMD      | 0                     | 4.85986399702598 | 0.947 | 0.182 | 0                     | 1       |
| GZMK     | 0                     | 3.12519579885936 | 0.424 | 0.019 | 0                     | 2       |
| IL7R     | 0                     | 3.01077025286076 | 0.5   | 0.02  | 0                     | 2       |
| CD69     | 0                     | 2.94537206115857 | 0.726 | 0.106 | 0                     | 2       |
| CXCR4    | 0                     | 2.9188029665928  | 0.886 | 0.227 | 0                     | 2       |
| TRAC     | 0                     | 2.59700805711885 | 0.653 | 0.058 | 0                     | 2       |
| HLA-DRA  | 0                     | 4.24285489822362 | 0.849 | 0.253 | 0                     | 3       |
| CXCL8    | 0                     | 4.18398707519192 | 0.562 | 0.053 | 0                     | 3       |
| C1QA     | 0                     | 4.06026658748762 | 0.71  | 0.028 | 0                     | 3       |
| CD74     | 0                     | 3.78416950025651 | 0.887 | 0.354 | 0                     | 3       |
| C1QC     | 0                     | 3.77207331588078 | 0.638 | 0.012 | 0                     | 3       |
| GNLY     | 0                     | 4.2851508393933  | 0.882 | 0.075 | 0                     | 4       |
| NKG7     | 0                     | 3.87804636348164 | 0.984 | 0.138 | 0                     | 4       |
| GZMB     | 0                     | 3.83851658763401 | 0.925 | 0.071 | 0                     | 4       |
| PRF1     | 0                     | 3.71707226409034 | 0.89  | 0.065 | 0                     | 4       |
| FGFBP2   | 0                     | 3.20214523026835 | 0.737 | 0.039 | 0                     | 4       |
| RGS5     | 0                     | 5.28421822246012 | 0.911 | 0.058 | 0                     | 5       |
| ACTA2    | 0                     | 4.51987305658022 | 0.81  | 0.067 | 0                     | 5       |
| TAGLN    | 0                     | 4.1472989179207  | 0.689 | 0.123 | 0                     | 5       |
| NDUFA4L2 | 0                     | 4.09931917981521 | 0.779 | 0.056 | 0                     | 5       |
| AGT      | 0                     | 3.6876745069365  | 0.74  | 0.041 | 0                     | 5       |
| SLC9A3R2 | 0                     | 4.04008473381861 | 0.851 | 0.079 | 0                     | 6       |
| IFI27    | 0                     | 3.79608410198314 | 0.825 | 0.121 | 0                     | 6       |
| ID1      | 0                     | 3.62468014382417 | 0.789 | 0.072 | 0                     | 6       |
| FABP4    | 0                     | 3.4888404087723  | 0.79  | 0.123 | 0                     | 6       |
| VWF      | 0                     | 3.34798840815497 | 0.773 | 0.08  | 0                     | 6       |
| S100A9   | 0                     | 5.00310628777903 | 0.694 | 0.027 | 0                     | 7       |
| S100A8   | 0                     | 4.94881242685836 | 0.571 | 0.013 | 0                     | 7       |
| LYZ      | 0                     | 4.26141716783104 | 0.838 | 0.099 | 0                     | 7       |
| FCN1     | 0                     | 3.70339245195514 | 0.765 | 0.014 | 0                     | 7       |
| LST1     | 0                     | 3.50614744551876 | 0.881 | 0.085 | 0                     | 7       |
| ACKR1    | 0                     | 3.97257247101983 | 0.741 | 0.007 | 0                     | 8       |
| STC1     | 0                     | 3.4008436313059  | 0.46  | 0.023 | 0                     | 8       |
| CCL14    | 0                     | 3.33867439895825 | 0.622 | 0.005 | 0                     | 8       |
| CLU      | 0                     | 3.09401426633057 | 0.764 | 0.09  | 0                     | 8       |
| PLAT     | 0                     | 2.82678356305652 | 0.702 | 0.027 | 0                     | 8       |
| TNNC1    | 1.43699903629166E-223 | 4.76107759314724 | 0.975 | 0.287 | 4.8743007311013E-219  | 9       |
| MB       | 4.21235193032254E-220 | 4.51647790429309 | 0.967 | 0.282 | 1.4288297747654E-215  | 9       |
| ACTA1    | 1.82481166635604E-210 | 4.85585977396702 | 0.979 | 0.314 | 6.18976117227969E-206 | 9       |
| TNNI3    | 1.4818891019274E-208  | 4.70464102242041 | 1     | 0.347 | 5.02656783373773E-204 | 9       |
| MYL2     | 3.9506659465879E-173  | 5.58323668400163 | 0.987 | 0.459 | 1.34006588908262E-168 | 9       |
| CCL21    | 0                     | 5.13205328081029 | 0.449 | 0.009 | 0                     | 10      |
| PKHD1L1  | 0                     | 3.87291638172088 | 0.532 | 0.003 | 0                     | 10      |
| TFF3     | 0                     | 3.28289030271198 | 0.427 | 0.016 | 0                     | 10      |
| EDN1     | 0                     | 3.07489369875103 | 0.363 | 0.021 | 0                     | 10      |

|          |                       |                  |       |       |                       |    |
|----------|-----------------------|------------------|-------|-------|-----------------------|----|
| CLU      | 1.82380791808203E-267 | 3.32236229036408 | 0.701 | 0.108 | 6.18635645813424E-263 | 10 |
| GPC6     | 5.22267657793858E-94  | 2.90893797803817 | 0.497 | 0.079 | 1.77153189523677E-89  | 11 |
| POSTN    | 1.46559009070073E-43  | 3.06775284892027 | 0.27  | 0.046 | 4.97128158765689E-39  | 11 |
| COL1A1   | 1.05211410073902E-41  | 3.67854698849994 | 0.417 | 0.11  | 3.56877102970677E-37  | 11 |
| PDE3B    | 2.5572673369461E-17   | 3.44251152886124 | 0.362 | 0.167 | 8.67425080692116E-13  | 11 |
| ACACB    | 6.3507832673874E-09   | 3.92448378530564 | 0.331 | 0.209 | 0.000215418568429781  | 11 |
| IGKC     | 1.55078454812611E-217 | 7.58008961455903 | 0.734 | 0.141 | 5.26026118724375E-213 | 12 |
| IGHG1    | 6.90440955885165E-207 | 6.42000621953637 | 0.404 | 0.041 | 2.34197572236248E-202 | 12 |
| IGLC2    | 1.64680518815126E-172 | 7.27737071491919 | 0.511 | 0.077 | 5.58596319820907E-168 | 12 |
| IGLC3    | 9.96566261184208E-162 | 6.70036041790492 | 0.369 | 0.042 | 3.38035275793683E-157 | 12 |
| IGHA1    | 5.19386773046055E-86  | 5.83511690446958 | 0.376 | 0.073 | 1.76175993417222E-81  | 12 |
| TPSAB1   | 0                     | 6.85256327327856 | 0.635 | 0.005 | 0                     | 13 |
| TPSB2    | 0                     | 6.36443747718339 | 0.806 | 0.01  | 0                     | 13 |
| SLC24A3  | 0                     | 4.78566818689652 | 0.553 | 0.018 | 0                     | 13 |
| IL18R1   | 1.32075565447894E-289 | 4.58241578915418 | 0.594 | 0.042 | 4.48000317999258E-285 | 13 |
| NTM      | 1.12275115714754E-252 | 4.77701416949464 | 0.494 | 0.033 | 3.80837192504445E-248 | 13 |
| FGF12    | 1.45499579881097E-69  | 2.86759966933442 | 0.924 | 0.209 | 4.93534574956681E-65  | 14 |
| FHL2     | 2.68435369638122E-65  | 3.37113657159157 | 0.924 | 0.25  | 9.10532773812509E-61  | 14 |
| PPP1R12B | 3.45017111772225E-56  | 2.86400244775912 | 0.911 | 0.279 | 1.17029804313139E-51  | 14 |
| TMEM178B | 1.09356460693364E-44  | 2.71873310457517 | 0.608 | 0.129 | 3.70937114671889E-40  | 14 |
| ATP2A2   | 1.34309389359206E-43  | 2.71588179524891 | 0.797 | 0.261 | 4.55577448706428E-39  | 14 |
| NRXN1    | 0                     | 6.30799621129182 | 0.916 | 0.016 | 0                     | 15 |
| XKR4     | 0                     | 5.25312021491104 | 0.773 | 0.013 | 0                     | 15 |
| KIRREL3  | 0                     | 4.15004602677765 | 0.597 | 0.015 | 0                     | 15 |
| CADM2    | 1.83155279084511E-288 | 4.52409425928216 | 0.723 | 0.045 | 6.21262706654662E-284 | 15 |
| NRXN3    | 1.72174344674826E-166 | 4.55304740506912 | 0.739 | 0.084 | 5.84015377137011E-162 | 15 |
