# Supplementary material for: Identification of TGF-β-related genes in cardiac hypertrophy and heart failure based on single cell RNA sequencing
Source: Aging (Albany NY). 2023 Jul 26;15(14):7187–218. doi: 10.18632/aging.204901 (PMC10415570; doi:10.18632/aging.204901)
Supplement: Supplementary Table 1 [file aging-15-204901-s002.xlsx]

## Sheet: AmiGo GO 0007179
Supplementary Table 1. TRGs used in this study.
Gene/product
ZYX
ZMIZ1
ZFYVE9
WFIKKN2
USP9Y
USP9X
USP15
TWSG1
TP53
TGFBRAP1
TGFBR3L
TGFBR3
TGFBR2
TGFBR1
TGFB3
TGFB2
TGFB1
TAB1
STAT3
SRC
SPI1
SMAD9
SMAD7
SMAD6
SMAD5
SMAD4
SMAD3
SMAD2
SMAD1
SKIL
SKI
SIRT1
PXN
PTPRK
PTK2
PSG9
PML
PARP1
NRROS
NODAL
NLK
MTMR4
MSTN
MAP3K7
LTBP4
LTBP3
LTBP2
LRRC32
LPXN
LEFTY1
JUN
ITGB8
ITGB6
ITGB5
ID1
HPGD
HIPK2
GDF9
GDF5
GDF15
GDF10
GCNT2
FUT8
FURIN
FSHB
FOXH1
FOS
FNTA
FMOD
FERMT2
ENG
EID2
DUSP22
DUSP15
COL3A1
COL1A2
CLDN5
CITED2
CITED1
CDH5
BMPR1A
BAMBI
ARRB2
APPL2
APPL1
AMHR2
ADAM9
ACVRL1
ACVR1

## Sheet: REACTOME_SIGNALING_BY_TGF_BETA_
genes
WWTR1
STRAP
NEDD4L
RHOA
PRKCZ
UBE2D1
RBL1
CCNT2
XPO1
PPP1R15A
FKBP1A
CCNK
BAMBI
MAPK1
SNW1
PPM1A
SMAD7
ATP1B4
MAPK3
PARD6A
STUB1
ARHGEF18
TGFB1
SERPINE1
TGFBR1
MTMR4
SMURF2
UBE2D3
CBL
CCNC
TFDP2
HDAC1
UCHL5
TGIF2
PMEPA1
USP9X
CCNT1
NEDD8
UBE2M
CDK8
E2F5
MEN1
USP15
SKIL
CDK9
MYC
FURIN
NCOR1
SMAD4
CGN
PARP1
RPS27A
CDKN2B
PARD3
UBC
ZFYVE9
RNF111
SKI
F11R
TGFBR2
SMAD3
UBB
JUNB
PPP1CA
SMAD2
TGIF1
SP1
PPP1CC
NCOR2
TRIM33
TFDP1
SMURF1
E2F4
PPP1CB
UBA52
SMURF1
NEDD8

## Sheet: KEGG_TGF_BETA_SIGNALING_PATHWAY
genes
CHRD
NOG
NBL1
MICOS10-NBL1
GREM1
GREM2
THBS1
DCN
FMOD
LEFTY1
LEFTY2
FST
BMP2
BMP4
BMP6
INHBB
BMP5
BMP7
BMP8B
BMP8A
GDF5
GDF6
GDF7
AMH
THSD4
FBN1
LTBP1
TGFB1
TGFB2
TGFB3
INHBA
INHBC
INHBE
NODAL
NEO1
HJV
BMPR1A
BMPR1B
ACVR1
BMPR2
ACVR2A
RGMA
RGMB
AMHR2
TGFBR1
TGFBR2
ACVR1B
ACVR2B
ACVR1C
BAMBI
SMAD1
SMAD5
SMAD9
SMAD2
SMAD3
SMAD4
SMAD6
SMAD7
SMURF1
SMURF2
ZFYVE9
ZFYVE16
HAMP
ID1
ID2
ID3
ID4
RBL1
E2F4
E2F5
TFDP1
CREBBP
EP300
SP1
TGIF1
TGIF2
MYC
CDKN2B
PITX2
RBX1
CUL1
SKP1
MAPK1
MAPK3
IFNG
TNF
RHOA
ROCK1
PPP2R1B
PPP2R1A
PPP2CA
PPP2CB
RPS6KB1
RPS6KB2

## Sheet: PID_TGFBR_PATHWAY
ZFYVE9
ZFYVE16
YWHAE
YAP1
XIAP
WWP1
TGFBR3
TGFBR2
TGFBR1
TGFB3
TGFB2
TGFB1
TAB2
TAB1
Symbol
STRAP
SPTBN1
SOS1
SMURF2
SMURF1
SMAD7
SMAD4
SMAD3
SMAD2
SKIL
SHC1
RPS6KB1
RNF111
RHOA
PPP2R2A
PPP2CB
PPP2CA
PPP1R15A
PPP1CA
PML
PDPK1
PARD6A
OCLN
NEDD4L
MAP3K7
ITCH
GRB2
FKBP1A
EIF2A
DYNLRB1
DAXX
DACT2
DAB2
CTNNB1
CCN2
CAV1
CAMK2A
BAMBI
AXIN1
ARRB2

## Sheet: BIOCARTA_TGFB_PATHWAY
Gene
ZFYVE9
ZFYVE9
ZFYVE9
TGFBR2
TGFBR2
TGFBR2
TGFBR1
TGFBR1
TGFB3
TGFB2
TGFB2
TGFB1
TAB1
TAB1
SMAD7
SMAD7
SMAD7
SMAD7
SMAD4
SMAD3
SMAD3
SMAD3
SMAD3
SMAD3
SMAD2
SMAD2
SMAD2
SKIL
SKIL
SKIL
SKIL
SKIL
MAPK3
MAPK3
MAPK3
MAP3K7
MAP3K7
MAP3K7
MAP3K7
MAP2K1
EP300
CREBBP
CREBBP
CDH1
APC
APC
APC

## Sheet: WP_CANONICAL_AND_NONCANONICAL_T
Gene
MAPK14
GREM1
LOX
LOXL1
LOXL2
SMAD2
SMAD3
SMAD4
MAPK8
MAPK9
BMP1
BMPR1A
BMPR2
TGFB1
TGFBR1
TGFBR2
LOXL4

## Sheet: WP_TGFBETA_RECEPTOR_SIGNALING
Symbol
MIR1281
LINC02478
MIR6869
FST
LEFTY1
CREBBP
CTNNB1
EGF
ENG
EP300
FKBP1A
ZNF423
FOS
BAMBI
HRAS
IFNG
INHBA
ITGB6
JAK1
JUN
LIF
LTBP1
MIR302A
SMAD1
SMAD2
SMAD3
SMAD4
SMAD5
SMAD6
SMAD7
SMAD9
NFKB1
SERPINE1
LEF1
MAPK3
MAPK9
SKI
SKIL
BMP4
SPP1
STAT1
STAT3
TFE3
TGFB1
LEFTY2
TGFBR1
TGFBR2
TGFBR3
TGIF1
THBS1
TNF
WNT1
RUNX2
RUNX3
FOXH1
NOG
ZFYVE9
ZEB2

## Sheet: WP_TGFBETA_SIGNALING_PATHWAY
Symbol
MIR1281
TRAP1
CDKN1A
CDKN2B
YAP1
TAB1
COPS5
WWP1
STRAP
MAP4K1
COL1A2
KLF6
ATF2
CREBBP
MAPK14
SIK1
DAB2
EID2
E2F4
E2F5
EP300
AKT1
ETS1
SNW1
NEDD4L
FN1
FOS
FOSB
SIN3A
GRB2
HDAC1
TNC
APP
ITGA2
ITGB1
ITGB3
ITGB4
JUN
JUNB
JUND
RHOA
LIMK2
SMAD2
SMAD3
SMAD4
SMAD7
MEF2A
MEF2C
MET
MMP1
MMP12
CITED1
MYC
ATF3
NEDD9
PAK2
PARD6A
FOXP3
UCHL5
PDK1
PIK3R1
PIK3R2
PML
RNF111
PPM1A
PRKAR2A
DCP1A
MAPK1
MAPK4
MAPK8
MAPK9
MAP2K1
MAP2K2
MAP2K3
MAP2K6
SMURF1
PTK2
STAMBPL1
RAC1
RAF1
RBL1
RBL2
CCND1
ROCK1
MAP2K4
PJA1
SHC1
SMURF2
SKI
SKIL
SKP1
SOS1
SP1
SPTBN1
SRC
MAP3K7
ZEB1
TERT
TFDP1
TGFB1
TGFB1I1
TGFBR1
TGFBR2
TGFBR3
TGIF1
THBS1
KLF10
TP53
TRAF6
UBE2I
SUMO1
SNIP1
NUP214
AXIN1
ITCH
CUL1
KLF11
PIAS1
CAV1
RUNX2
FOXH1
BTRC
PIAS2
CCNB2
HGS
ZFYVE9
BCAR1
ZFYVE16
CDK1
ZEB2
NUP153
RBX1
CDC42

## Sheet:  TGF-β genes
genes
ZYX
ZNF423
ZMIZ1
ZFYVE9
ZFYVE16
ZEB2
ZEB1
YWHAE
YAP1
XPO1
XIAP
WWTR1
WWP1
WNT1
WFIKKN2
USP9Y
USP9X
USP15
UCHL5
UBE2M
UBE2I
UBE2D3
UBE2D1
UBC
UBB
UBA52
TWSG1
TRIM33
TRAP1
TRAF6
TP53
TNF
TNC
THSD4
THBS1
TGIF2
TGIF1
TGFBRAP1
TGFBR3L
TGFBR3
TGFBR2
TGFBR1
TGFB3
TGFB2
TGFB1I1
TGFB1
TFE3
TFDP2
TFDP1
TERT
TAB2
TAB1
SUMO1
STUB1
STRAP
STAT3
STAT1
STAMBPL1
SRC
SPTBN1
SPP1
SPI1
SP1
SOS1
SNW1
SNIP1
SMURF2
SMURF1
SMAD9
SMAD7
SMAD6
SMAD5
SMAD4
SMAD3
SMAD2
SMAD1
SKP1
SKIL
SKI
SIRT1
SIN3A
SIK1
SHC1
SERPINE1
RUNX3
RUNX2
RPS6KB2
RPS6KB1
RPS27A
ROCK1
RNF111
RHOA
RGMB
RGMA
RBX1
RBL2
RBL1
RAF1
RAC1
PXN
PTPRK
PTK2
PSG9
PRKCZ
PRKAR2A
PPP2R2A
PPP2R1B
PPP2R1A
PPP2CB
PPP2CA
PPP1R15A
PPP1CC
PPP1CB
PPP1CA
PPM1A
PML
PMEPA1
PJA1
PITX2
PIK3R2
PIK3R1
PIAS2
PIAS1
PDPK1
PDK1
PARP1
PARD6A
PARD3
PAK2
OCLN
NUP214
NUP153
NRROS
NOG
NODAL
NLK
NFKB1
NEO1
NEDD9
NEDD8
NEDD4L
NCOR2
NCOR1
NBL1
MYC
MTMR4
MSTN
MMP12
MMP1
MIR6869
MIR302A
MIR1281
MICOS10-NBL1
MET
MEN1
MEF2C
MEF2A
MAPK9
MAPK8
MAPK4
MAPK3
MAPK14
MAPK1
MAP4K1
MAP3K7
MAP2K6
MAP2K4
MAP2K3
MAP2K2
MAP2K1
LTBP4
LTBP3
LTBP2
LTBP1
LRRC32
LPXN
LOXL4
LOXL2
LOXL1
LOX
LINC02478
LIMK2
LIF
LEFTY2
LEFTY1
LEF1
KLF6
KLF11
KLF10
JUND
JUNB
JUN
JAK1
ITGB8
ITGB6
ITGB5
ITGB4
ITGB3
ITGB1
ITGA2
ITCH
INHBE
INHBC
INHBB
INHBA
IFNG
ID4
ID3
ID2
ID1
HRAS
HPGD
HJV
HIPK2
HGS
HDAC1
HAMP
GREM2
GREM1
GRB2
GDF9
GDF7
GDF6
GDF5
GDF15
GDF10
GCNT2
FUT8
FURIN
FST
FSHB
FOXP3
FOXH1
FOSB
FOS
FNTA
FN1
FMOD
FKBP1A
FERMT2
FBN1
F11R
ETS1
EP300
ENG
EIF2A
EID2
EGF
E2F5
E2F4
DYNLRB1
DUSP22
DUSP15
DCP1A
DCN
DAXX
DACT2
DAB2
CUL1
CTNNB1
CREBBP
COPS5
COL3A1
COL1A2
CLDN5
CITED2
CITED1
CHRD
CGN
CDKN2B
CDKN1A
CDK9
CDK8
CDK1
CDH5
CDH1
CDC42
CCNT2
CCNT1
CCNK
CCND1
CCNC
CCNB2
CCN2
CBL
CAV1
CAMK2A
BTRC
BMPR2
BMPR1B
BMPR1A
BMP8B
BMP8A
BMP7
BMP6
BMP5
BMP4
BMP2
BMP1
BCAR1
BAMBI
AXIN1
ATP1B4
ATF3
ATF2
ARRB2
ARHGEF18
APPL2
APPL1
APP
APC
AMHR2
AMH
AKT1
ADAM9
ACVRL1
ACVR2B
ACVR2A
ACVR1C
ACVR1B
ACVR1
