# Supplementary material for: Identification of TGF-β-related genes in cardiac hypertrophy and heart failure based on single cell RNA sequencing
Source: Aging (Albany NY). 2023 Jul 26;15(14):7187–218. doi: 10.18632/aging.204901 (PMC10415570; doi:10.18632/aging.204901)
Supplement: Supplementary Table 4 [file aging-15-204901-s004.xlsx]

## Sheet: deg
Supplementary Table 4. DEGs for GSE57338.
logFC	AveExpr	t	P.Value	adj.P.Val	B	probe_id	symbol	change	ENTREZID
-2.63909	7.05933	-24.4389	1.1363e-74	3.78355e-70	159.143	7976496	SERPINA3	down	12
-0.668352	8.55727	-22.8511	8.61282e-69	9.55936e-65	145.777	7992987	HMOX2	down	3163
1.05464	5.60942	22.7309	2.42384e-68	2.01767e-64	144.755	8160168	FREM1	up	158326
-1.7869	8.00935	-21.0341	6.15062e-62	2.92567e-58	130.181	7914075	FCN3	down	8547
1.06154	4.75265	20.9071	1.8719e-61	7.79108e-58	129.081	7989146	MNS1	up	55329
1.18552	7.0527	20.481	7.89488e-60	2.92084e-56	125.381	8123446	SMOC2	up	64094
0.733367	6.75263	19.6414	1.29984e-56	4.32808e-53	118.055	8174119	ZMAT1	up	84460
-0.603446	6.85156	-18.9658	5.16357e-54	1.56301e-50	112.134	7986092	FURIN	down	5045
-0.669343	5.53158	-18.9523	5.81868e-54	1.61454e-50	112.016	7923347	LAD1	down	3898
1.00043	6.19524	18.8153	1.96187e-53	5.02495e-50	110.813	8162404	ECM2	up	1842
-0.917414	5.63322	-18.5636	1.8347e-52	4.36358e-49	108.601	8165277	LCN6	down	158062
-0.830097	6.91342	-18.483	3.75219e-52	8.32912e-49	107.893	8074991	GGT5	down	2687
-1.36131	6.51564	-18.4222	6.44215e-52	1.26179e-48	107.358	8063923	SLCO4A1	down	28231
1.01901	6.46441	18.4122	7.04245e-52	1.30274e-48	107.27	8102532	PDE5A	up	8654
1.23123	9.67285	18.2292	3.58227e-51	6.27784e-48	105.66	7965403	LUM	up	4060
1.82276	7.5649	17.788	1.81069e-49	3.01453e-46	101.777	8162394	ASPN	up	54829
0.811202	6.9571	17.6769	4.86596e-49	7.71532e-46	100.799	7931977	ITIH5	up	80760
-0.377125	8.50051	-17.4878	2.61432e-48	3.95677e-45	99.1347	8126066	MTCH1	stable	23787
-0.828483	8.65144	-17.4305	4.35549e-48	6.30542e-45	98.6294	8073449	CSDC2	down	27254
1.35684	5.99723	17.2866	1.56621e-47	2.17292e-44	97.3625	8057506	FRZB	up	2487
0.500149	6.76552	17.1648	4.62379e-47	6.15833e-44	96.2908	8146159	AP3M2	up	10947
0.993419	5.29415	17.1292	6.34384e-47	8.12426e-44	95.9777	8169115	NRK	up	203447
0.883307	5.89951	17.1206	6.84992e-47	8.44747e-44	95.9018	8147516	MATN2	up	4147
0.820469	6.24951	17.1106	7.4882e-47	8.9048e-44	95.8136	7984813	ISLR	up	3671
-1.75892	5.83798	-17.0828	9.59019e-47	1.10112e-43	95.5686	8044021	IL1RL1	down	9173
0.695454	6.02779	17.0372	1.43837e-46	1.54495e-43	95.1673	7920552	KCNN3	up	3782
-0.857905	4.57848	-17.0294	1.54122e-46	1.60369e-43	95.099	8055194	TUBA3E	down	112714
-0.412443	7.46919	-17.0227	1.63576e-46	1.65049e-43	95.04	7980970	ITPK1	down	3705
1.02654	5.45072	17.002	1.96673e-46	1.92606e-43	94.8576	8123104	FNDC1	up	84624
0.721214	6.46644	16.9976	2.04485e-46	1.94536e-43	94.8191	7959002	SDSL	up	113675
0.884945	6.06865	16.9794	2.40343e-46	2.22297e-43	94.6591	7952011	SCN2B	up	6327
0.387427	7.75311	16.8676	6.48999e-46	5.84046e-43	93.6757	8068522	TTC3	stable	7267
0.998262	5.74996	16.7387	2.04101e-45	1.78841e-42	92.5414	8143144	PTN	up	5764
-1.52004	7.42487	-16.6622	4.02639e-45	3.43761e-42	91.8688	7960794	CD163	down	9332
1.7769	4.97188	16.6194	5.89016e-45	4.90312e-42	91.4921	8139087	SFRP4	up	6424
-0.856335	5.62983	-16.6001	6.99166e-45	5.67808e-42	91.3224	8134463	NPTX2	down	4885
0.556439	7.62671	16.5828	8.14694e-45	6.45878e-42	91.171	7931097	HTRA1	up	5654
0.783971	5.63183	16.5195	1.42971e-44	1.10709e-41	90.6142	7996198	CCDC113	up	29070
-0.450636	7.77169	-16.3746	5.1732e-44	3.82782e-41	89.341	7929634	ZDHHC16	down	84287
0.872542	4.21035	16.2372	1.74862e-43	1.2388e-40	88.1352	7933750	SLC16A9	up	220963
-0.718762	8.24022	-16.1415	4.08343e-43	2.83262e-40	87.2955	8092691	BCL6	down	604
-0.676457	5.99042	-16.1166	5.09434e-43	3.46176e-40	87.0765	7985934	SEMA4B	down	10509
-0.301199	8.29481	-16.1058	5.60492e-43	3.68539e-40	86.982	7898328	SZRD1	stable	26099
0.394021	5.92269	16.105	5.64479e-43	3.68539e-40	86.9749	8097307	INTU	stable	27152
0.667734	6.38239	16.0962	6.1e-43	3.90599e-40	86.8982	8117458	BTN3A1	up	11119
-0.384234	8.38754	-16.0484	9.31651e-43	5.85305e-40	86.4789	8013191	FLII	stable	2314
-0.574032	8.82376	-16.0326	1.07188e-42	6.60935e-40	86.34	8000244	USP31	down	57478
-0.295341	9.78231	-16.0145	1.25793e-42	7.61549e-40	86.1816	7916747	JAK1	stable	3716
-0.508656	7.68666	-16.0065	1.35027e-42	8.02853e-40	86.1114	8092457	ALG3	down	10195
-1.29918	7.11964	-15.9896	1.56847e-42	9.16232e-40	85.9631	8173287	VSIG4	down	11326
0.488158	4.03799	15.9495	2.23693e-42	1.28419e-39	85.6117	7934334	CFAP70	up	118491
0.54299	7.58537	15.9413	2.40579e-42	1.35772e-39	85.5396	8091354	HLTF	up	6596
-0.445692	6.9011	-15.9256	2.76339e-42	1.53355e-39	85.4024	8038347	TEAD2	down	8463
0.531942	7.11862	15.9116	3.12856e-42	1.70569e-39	85.2795	8114593	APBB3	up	10307
-0.394377	6.87153	-15.9099	3.17604e-42	1.70569e-39	85.2646	8143879	TMUB1	down	83590
0.611668	4.02224	15.8712	4.47147e-42	2.36328e-39	84.9259	8094184	C1QTNF7	up	114905
1.32219	7.6824	15.8284	6.53325e-42	3.39902e-39	84.5505	8162373	OGN	up	4969
-0.415304	7.15324	-15.7679	1.11532e-41	5.71336e-39	84.021	8075106	TPST2	down	8459
0.509189	8.6747	15.7414	1.40966e-41	7.11174e-39	83.7891	7942123	CCND1	up	595
-0.370413	10.6064	-15.6789	2.44861e-41	1.21688e-38	83.2424	7914489	PTP4A2	stable	8073
-0.550159	7.17924	-15.579	5.91698e-41	2.89732e-38	82.3689	8158431	PHYHD1	down	254295
0.831735	4.75479	15.5492	7.69939e-41	3.71546e-38	82.1082	7946454	SCUBE2	up	57758
0.465421	9.6338	15.5402	8.33541e-41	3.96492e-38	82.0296	7947681	ARHGAP1	up	392
-0.603744	10.4023	-15.5344	8.77346e-41	4.1145e-38	81.9789	8015607	STAT3	down	6774
-0.584464	5.9718	-15.4806	1.40958e-40	6.5187e-38	81.5094	8165271	LCN10	down	414332
0.553121	6.81496	15.4047	2.75382e-40	1.25608e-37	80.8464	8081503	DZIP3	up	9666
0.334657	8.1415	15.3982	2.91688e-40	1.31248e-37	80.7894	8128394	PNISR	stable	25957
0.798094	7.39473	15.3951	2.99758e-40	1.33081e-37	80.7624	7965941	GLT8D2	up	83468
1.12064	7.17778	15.3887	3.17e-40	1.38883e-37	80.707	7902541	IFI44L	up	10964
-1.17179	8.12717	-15.3721	3.67076e-40	1.58734e-37	80.5618	8088560	ADAMTS9	down	56999
-1.16406	4.23124	-15.3498	4.4683e-40	1.90745e-37	80.3672	7973110	RNASE2	down	6036
-0.443556	6.44889	-15.298	7.05003e-40	2.97145e-37	79.9157	8074261	BID	down	637
-0.360892	8.01007	-15.2704	8.99314e-40	3.74306e-37	79.6746	7920409	JTB	stable	10899
0.950853	5.89163	15.2538	1.04073e-39	4.27818e-37	79.53	7935296	TLL2	up	7093
-0.960641	6.46912	-15.2418	1.15616e-39	4.69472e-37	79.4259	8160670	AQP3	down	360
-0.567316	8.48098	-15.2306	1.27638e-39	5.12045e-37	79.328	7962058	TMTC1	down	83857
-0.439444	7.2107	-15.1726	2.12731e-39	8.4325e-37	78.8222	7955562	ACVRL1	down	94
-0.488358	8.20309	-15.1191	3.40354e-39	1.31776e-36	78.3569	7977077	MARK3	down	4140
-0.604283	8.32365	-15.1109	3.66007e-39	1.4008e-36	78.285	8087935	NT5DC2	down	64943
-0.64351	6.21842	-15.0871	4.51212e-39	1.70727e-36	78.0778	7902425	ST6GALNAC3	down	256435
-0.467278	6.88068	-15.0659	5.43418e-39	2.03306e-36	77.8937	7949808	PITPNM1	down	9600
0.729824	6.22626	15.0527	6.10305e-39	2.25793e-36	77.7788	8171248	ANOS1	up	3730
-0.994155	8.42847	-14.9348	1.71889e-38	6.28943e-36	76.7536	8010287	C1QTNF1	down	114897
0.55958	8.15068	14.9309	1.77903e-38	6.43872e-36	76.7196	8028872	LTBP4	up	8425
-0.3296	7.84353	-14.9134	2.07288e-38	7.42157e-36	76.5682	8175924	NAA10	stable	8260
0.460526	8.03171	14.8957	2.42137e-38	8.57705e-36	76.4144	8147469	CPQ	up	10404
0.416619	3.94118	14.872	2.9803e-38	1.04458e-35	76.2087	7951521	C11orf65	up	160140
-0.356563	7.49169	-14.8562	3.425e-38	1.17569e-35	76.071	7920401	SLC39A1	stable	27173
-0.366913	7.70948	-14.7993	5.63767e-38	1.91549e-35	75.5776	8076137	SUN2	stable	25777
-0.518837	10.6562	-14.7577	8.1226e-38	2.7319e-35	75.2161	7904254	ATP1A1	down	476
-1.57928	10.121	-14.6994	1.3526e-37	4.50374e-35	74.7112	7977987	MYH6	down	4624
-1.43473	9.10381	-14.6903	1.46437e-37	4.82764e-35	74.6326	7946579	LYVE1	down	10894
-0.596934	8.87906	-14.6427	2.2224e-37	7.25482e-35	74.2196	7925320	NID1	down	4811
-0.344119	6.1703	-14.6247	2.59962e-37	8.40384e-35	74.0644	8172345	ELK1	stable	2002
-0.234211	8.65724	-14.5956	3.35474e-37	1.07407e-34	73.812	7941274	SCYL1	stable	57410
-0.257182	9.84454	-14.5914	3.48051e-37	1.10372e-34	73.7755	8048847	AGFG1	stable	3267
1.06625	6.59109	14.5794	3.86216e-37	1.21319e-34	73.6725	7965040	PHLDA1	up	22822
-0.653872	5.80795	-14.5772	3.93967e-37	1.22597e-34	73.6528	7953150	TEAD4	down	7004
0.233611	3.4998	14.5715	4.13811e-37	1.2758e-34	73.6042	8104856	SPEF2	stable	79925
-0.717841	3.73585	-14.5656	4.35781e-37	1.33121e-34	73.553	8173059	WNK3	down	65267
-0.409028	8.07031	-14.5588	4.62631e-37	1.38777e-34	73.4938	7990080	LARP6	down	55323
-0.359211	7.60619	-14.5268	6.11969e-37	1.81935e-34	73.2168	7941302	FAM89B	stable	23625
-0.480937	8.47905	-14.5194	6.52644e-37	1.92311e-34	73.1531	8065569	BCL2L1	down	598
-0.633903	5.43153	-14.5078	7.21998e-37	2.1088e-34	73.0531	7934533	DUSP13	down	51207
-0.455107	5.78675	-14.4986	7.82428e-37	2.26543e-34	72.9736	7956076	CDK2	down	1017
0.714287	8.56991	14.4847	8.83302e-37	2.53546e-34	72.8535	8113073	ARRDC3	up	57561
-0.389914	7.27465	-14.4789	9.29201e-37	2.64441e-34	72.8034	8075239	THOC5	stable	8563
-0.298851	7.60313	-14.4536	1.15865e-36	3.23853e-34	72.5849	7953547	ATN1	stable	1822
-0.850025	4.40938	-14.4528	1.16714e-36	3.23853e-34	72.5777	7973108	ECRP	down	643332
0.626689	7.60087	14.4379	1.32871e-36	3.65637e-34	72.4493	8157976	GARNL3	up	84253
0.69828	7.60286	14.391	2.0001e-36	5.4144e-34	72.0444	8131996	CREB5	up	9586
-0.376595	8.15673	-14.384	2.12674e-36	5.7108e-34	71.9837	7899043	SELENON	stable	57190
0.650925	5.3003	14.36	2.62151e-36	6.98307e-34	71.7766	7929047	IFIT2	up	3433
-0.293562	6.85762	-14.3405	3.10815e-36	8.21364e-34	71.608	8024282	DAZAP1	stable	26528
-0.392	7.05269	-14.3381	3.17228e-36	8.31712e-34	71.5878	8076307	RANGAP1	stable	5905
0.561859	4.71116	14.3357	3.24073e-36	8.4302e-34	71.5667	8168517	LPAR4	up	2846
-0.425084	5.60472	-14.2992	4.4527e-36	1.14047e-33	71.2522	8009693	TMEM104	down	54868
0.295416	6.71892	14.2752	5.48714e-36	1.3947e-33	71.0454	8103646	NEK1	stable	4750
-0.344001	6.01164	-14.2365	7.68363e-36	1.92362e-33	70.7121	8029507	NECTIN2	stable	5819
0.913348	5.72721	14.1819	1.23536e-35	3.02706e-33	70.242	8041644	PLEKHH2	up	130271
-0.385781	7.92827	-14.1818	1.23639e-35	3.02706e-33	70.2412	7973352	LRP10	stable	26020
0.300164	6.80906	14.1488	1.64667e-35	3.94455e-33	69.9575	8078834	WDR48	stable	57599
-0.291686	10.6759	-14.1364	1.83407e-35	4.36208e-33	69.8508	7947425	CD59	stable	966
0.458123	6.81638	14.133	1.88898e-35	4.42938e-33	69.8216	7946757	SOX6	up	55553
-0.485061	6.62781	-14.085	2.86536e-35	6.62554e-33	69.4091	7952116	BCL9L	down	283149
1.01542	6.43845	14.0616	3.5107e-35	8.06178e-33	69.2081	8083494	MME	up	4311
-0.597774	9.16067	-14.0576	3.63653e-35	8.29354e-33	69.1732	7960730	LPCAT3	down	10162
-0.507836	6.8812	-14.054	3.74945e-35	8.49288e-33	69.1429	7918558	KCND3	down	3752
-0.397656	6.77808	-14.0008	5.94963e-35	1.33855e-32	68.6859	8036867	C19orf47	down	126526
-0.340387	6.20992	-13.9586	8.57861e-35	1.91706e-32	68.3236	8153664	BOP1	stable	23246
-1.89045	7.98553	-13.9561	8.76011e-35	1.94457e-32	68.3029	7913216	PLA2G2A	down	5320
0.883002	5.82995	13.9468	9.49794e-35	2.08249e-32	68.2229	7938225	OLFML1	up	283298
0.418854	7.6562	13.9467	9.50653e-35	2.08249e-32	68.222	8146794	PREX2	up	80243
0.725351	5.0538	13.9262	1.13488e-34	2.46981e-32	68.0466	7972650	FGF14	up	2259
-0.467279	6.18356	-13.9185	1.21369e-34	2.62418e-32	67.9802	7899562	PTPRU	down	10076
0.533459	5.90985	13.9168	1.2315e-34	2.6455e-32	67.9658	8025984	ZNF844	up	284391
0.58265	5.85889	13.8756	1.75942e-34	3.73144e-32	67.6126	8168968	GPRASP1	up	9737
-0.623786	9.06264	-13.867	1.89575e-34	3.99511e-32	67.5388	8167449	PLP2	down	5355
-0.431821	7.59252	-13.8534	2.13082e-34	4.46227e-32	67.423	8072242	NF2	down	4771
-0.63334	5.91246	-13.8446	2.30001e-34	4.77734e-32	67.3474	7950990	SLC36A4	down	120103
0.244892	7.62458	13.8287	2.63859e-34	5.42328e-32	67.2115	7922912	TPR	stable	7175
-0.406539	6.23533	-13.8185	2.88155e-34	5.88632e-32	67.1243	8158224	SLC27A4	down	10999
0.426578	4.83901	13.8109	3.07908e-34	6.25148e-32	67.0587	7909510	HHAT	up	55733
-0.395401	6.19275	-13.795	3.53042e-34	7.1244e-32	66.9233	8086908	PLXNB1	down	5364
0.351717	9.31745	13.7887	3.72839e-34	7.47857e-32	66.8693	8158317	SPTAN1	stable	6709
0.532188	8.37027	13.7725	4.28836e-34	8.55027e-32	66.7308	8128991	LAMA4	up	3910
-0.3205	8.27909	-13.758	4.85984e-34	9.57503e-32	66.6069	8084439	EIF4G1	stable	1981
0.312484	6.57482	13.7531	5.0706e-34	9.89205e-32	66.5649	8050846	DTNB	stable	1838
-0.33054	6.30153	-13.7529	5.08016e-34	9.89205e-32	66.563	8076569	TTLL12	stable	23170
0.543081	7.89838	13.7335	6.00751e-34	1.16298e-31	66.3971	8004184	XAF1	up	54739
0.26658	7.50752	13.7018	7.8947e-34	1.49358e-31	66.1267	8011462	NCBP3	stable	55421
0.469968	4.21647	13.6952	8.3528e-34	1.57132e-31	66.0709	8058462	MDH1B	up	130752
-0.369768	8.77939	-13.6934	8.48454e-34	1.58713e-31	66.0554	7968242	GTF3A	stable	2971
-0.289631	5.35178	-13.6872	8.95092e-34	1.66502e-31	66.0024	8035040	WIZ	stable	58525
0.506832	7.51386	13.6602	1.12954e-33	2.08946e-31	65.7721	8152491	EXT1	up	2131
-0.433334	6.93767	-13.6557	1.17413e-33	2.15994e-31	65.7338	7967879	CCNQ	down	92002
-0.268417	8.79666	-13.642	1.32198e-33	2.41857e-31	65.6164	7959173	RNF10	stable	9921
0.689193	5.65094	13.6302	1.46297e-33	2.63326e-31	65.5161	7999291	C16orf89	up	146556
0.562006	5.37025	13.5905	2.05938e-33	3.66692e-31	65.1777	8157193	ZNF483	up	158399
-0.345367	7.65293	-13.5801	2.25281e-33	3.98998e-31	65.0888	8055183	SMPD4	stable	55627
-0.52063	7.55667	-13.5753	2.34771e-33	4.13608e-31	65.048	7914042	MAP3K6	down	9064
0.516329	5.66209	13.5691	2.47645e-33	4.33992e-31	64.9952	8103563	DDX60	up	55601
0.466927	6.41926	13.5469	2.99681e-33	5.22433e-31	64.8064	8102567	PRDM5	up	11107
-1.19129	5.98553	-13.5327	3.38757e-33	5.87479e-31	64.6851	7921821	ADAMTS4	down	9507
-0.337011	5.51746	-13.5195	3.79379e-33	6.49494e-31	64.573	8015955	ATXN7L3	stable	56970
0.717886	5.06939	13.5192	3.80368e-33	6.49494e-31	64.5704	8101675	ABCG2	up	9429
-0.30232	7.07955	-13.5091	4.14794e-33	7.04663e-31	64.4847	8032076	RNF126	stable	55658
0.881762	8.01383	13.5037	4.34575e-33	7.34519e-31	64.4385	8013341	MFAP4	up	4239
-0.403895	7.48955	-13.5019	4.4127e-33	7.42069e-31	64.4234	8026155	NACC1	down	112939
0.540309	5.72609	13.4956	4.6595e-33	7.79635e-31	64.3696	8115594	C1QTNF2	up	114898
0.424946	4.93683	13.4649	6.06581e-33	1.00987e-30	64.1085	8099817	KLF3-AS1	up	79667
-0.868	7.01353	-13.4631	6.15585e-33	1.01976e-30	64.0939	7903980	C1orf162	down	128346
-0.345333	8.50969	-13.4542	6.64975e-33	1.09612e-30	64.0175	7930139	TRIM8	stable	81603
-0.492735	5.31963	-13.4469	7.07862e-33	1.16107e-30	63.9557	8032839	SEMA6B	down	10501
-0.416164	4.84154	-13.4415	7.4132e-33	1.20999e-30	63.91	8018731	RHBDF2	down	79651
0.889574	4.17149	13.4331	7.96872e-33	1.29432e-30	63.8385	8146967	CRISPLD1	up	83690
-0.339495	7.15563	-13.4311	8.10168e-33	1.30952e-30	63.8221	8031550	EPN1	stable	29924
-0.608023	6.83813	-13.4233	8.6689e-33	1.38773e-30	63.7551	7922474	KIAA0040	down	9674
0.667354	5.75327	13.4166	9.18238e-33	1.4629e-30	63.6982	8174654	KLHL13	up	90293
0.591832	7.96492	13.4126	9.49994e-33	1.50628e-30	63.6645	8012475	MYH10	up	4628
-0.304299	6.69216	-13.3945	1.1097e-32	1.75116e-30	63.5107	7994928	PHKG2	stable	5261
-0.269629	6.08431	-13.3729	1.33537e-32	2.08751e-30	63.3275	7905854	ZBTB7B	stable	51043
-0.407744	6.23936	-13.3688	1.38287e-32	2.14164e-30	63.2929	7960575	NOP2	down	4839
-0.334786	6.56363	-13.3458	1.68366e-32	2.59541e-30	63.0981	8019376	DUS1L	stable	64118
-0.320602	3.16195	-13.3447	1.70026e-32	2.60892e-30	63.0884	7962029	OVCH1	stable	341350
0.453485	8.53033	13.3265	1.98705e-32	3.03499e-30	62.9342	7954481	SSPN	up	8082
0.36797	7.38417	13.3258	1.99882e-32	3.03903e-30	62.9283	8167815	MAGED2	stable	10916
0.988809	5.61699	13.3197	2.10603e-32	3.18748e-30	62.8766	8173917	NAP1L3	up	4675
1.22317	7.41722	13.3164	2.16716e-32	3.26515e-30	62.8483	8171172	MXRA5	up	25878
-0.45867	6.88436	-13.3145	2.20197e-32	3.30266e-30	62.8325	7898677	HS6ST1	down	9394
0.433774	6.57742	13.2974	2.54942e-32	3.80664e-30	62.6875	7913883	PAFAH2	up	5051
-0.3901	7.59865	-13.2934	2.63809e-32	3.92146e-30	62.6537	8061428	ENTPD6	stable	955
-0.525472	5.61158	-13.2763	3.05312e-32	4.51821e-30	62.5091	8044793	STEAP3	down	55240
0.399246	6.03864	13.2654	3.35104e-32	4.93715e-30	62.4169	7968703	NHLRC3	up	387921
0.893066	5.17277	13.2492	3.8494e-32	5.64642e-30	62.2797	8005043	LINC00670	up	284034
0.444753	5.41381	13.2322	4.45386e-32	6.5044e-30	62.1354	8078461	FBXL2	up	25827
-0.617136	6.78727	-13.2239	4.77896e-32	6.94869e-30	62.0657	8166797	MID1IP1	down	58526
-0.431972	10.2706	-13.2221	4.85525e-32	7.02892e-30	62.05	7989670	RBPMS2	down	348093
0.419323	10.614	13.2088	5.43646e-32	7.80249e-30	61.9381	7953200	CCND2	up	894
0.341458	4.99775	13.2055	5.59527e-32	7.99596e-30	61.9096	8009096	ACE	stable	1636
0.707598	5.59265	13.2029	5.71736e-32	8.10089e-30	61.8882	8077833	SLC6A1	up	6529
-0.287579	6.7154	-13.1922	6.26459e-32	8.83864e-30	61.7978	8051119	PPM1G	stable	5496
0.436508	8.34342	13.1741	7.31277e-32	1.0274e-29	61.6447	8135734	CPED1	up	79974
-0.556339	4.63189	-13.1717	7.46758e-32	1.04474e-29	61.624	8041961	CHAC2	down	494143
-0.366921	6.8617	-13.1494	9.03159e-32	1.25826e-29	61.4358	7941565	KLC2	stable	64837
-0.328072	10.9981	-13.1044	1.3253e-31	1.83869e-29	61.0563	8109333	GPX3	stable	2878
-0.348789	7.84341	-13.0995	1.38202e-31	1.90943e-29	61.0148	7928705	TSPAN14	stable	81619
-0.288876	7.81255	-13.0868	1.53996e-31	2.11885e-29	60.9077	8059139	ATG9A	stable	79065
0.407015	5.09124	13.0831	1.58909e-31	2.17745e-29	60.8766	8128247	BACH2	up	60468
-0.339317	7.54794	-13.077	1.6733e-31	2.28344e-29	60.8255	8155062	TESK1	stable	7016
-0.675732	4.20819	-13.0539	2.03867e-31	2.75219e-29	60.6301	8119620	GNMT	down	27232
-0.6923	8.01507	-13.0532	2.04986e-31	2.75219e-29	60.6247	7972157	EDNRB	down	1910
0.357245	8.01702	13.0438	2.22013e-31	2.93348e-29	60.5457	8108832	DELE1	stable	9812
-0.584075	10.3139	-13.0376	2.3419e-31	3.08214e-29	60.4929	7933084	NAMPT	down	10135
-0.327161	5.59532	-13.0302	2.49365e-31	3.26894e-29	60.4307	8018428	GALK1	stable	2584
0.317039	6.25568	13.0249	2.60898e-31	3.39341e-29	60.386	7976726	EVL	stable	51466
-0.259515	8.86394	-13.0191	2.73969e-31	3.54955e-29	60.3376	8094574	TBC1D1	stable	23216
0.596048	6.69003	13.0144	2.85215e-31	3.68093e-29	60.2978	8047487	FZD7	up	8324
-0.326019	7.58373	-12.9971	3.30511e-31	4.24904e-29	60.152	8145136	PPP3CC	stable	5533
0.701491	4.87921	12.991	3.47979e-31	4.45641e-29	60.101	8120967	NT5E	up	4907
0.433135	4.69242	12.981	3.78929e-31	4.83418e-29	60.0167	7950810	SYTL2	up	54843
-0.394556	10.1348	-12.9678	4.23828e-31	5.38634e-29	59.9059	7907439	PRDX6	down	9588
0.455456	6.6867	12.9553	4.71436e-31	5.96859e-29	59.8006	8087485	UBA7	up	7318
-0.481716	7.53899	-12.9225	6.22911e-31	7.82682e-29	59.5249	8158424	LRRC8A	down	56262
0.275555	7.89576	12.9138	6.70775e-31	8.39654e-29	59.4516	8163023	ELP1	stable	8518
-0.277979	7.19356	-12.9108	6.87791e-31	8.54529e-29	59.4268	7964021	RNF41	stable	10193
0.888398	7.50917	12.8942	7.91953e-31	9.78852e-29	59.2873	8000117	CRYM	up	1428
0.796414	8.59661	12.8939	7.93735e-31	9.78852e-29	59.2851	7929388	PLCE1	up	51196
-0.352249	5.90358	-12.8903	8.19011e-31	1.0063e-28	59.254	8018494	TRIM47	stable	91107
0.727041	5.94317	12.8893	8.25623e-31	1.01069e-28	59.2461	8145532	EPHX2	up	2053
-0.770034	5.04833	-12.8692	9.79215e-31	1.19432e-28	59.0773	7923596	ETNK2	down	55224
-0.374372	7.29183	-12.8623	1.03768e-30	1.2594e-28	59.0199	7905881	ADAM15	stable	8751
0.32217	6.30965	12.8621	1.04014e-30	1.2594e-28	59.0175	7929858	SLF2	stable	55719
-0.63843	4.44781	-12.8489	1.16262e-30	1.39753e-28	58.9074	8044035	IL18R1	down	8809
0.420737	6.74155	12.837	1.28585e-30	1.53458e-28	58.8077	8164343	FAM102A	up	399665
-0.316424	6.79902	-12.8254	1.41978e-30	1.68837e-28	58.7097	7929649	UBTD1	stable	80019
-0.724589	8.16192	-12.8178	1.51375e-30	1.79371e-28	58.6463	8105040	OSMR	down	9180
0.683927	6.94418	12.815	1.54978e-30	1.82989e-28	58.623	7907297	FMO4	up	2329
-0.42725	9.1497	-12.8114	1.59781e-30	1.87994e-28	58.5928	8180386	NME2	down	4831
-0.468759	7.13274	-12.8078	1.64698e-30	1.93097e-28	58.5628	7996081	ADGRG1	down	9289
-0.527466	8.05544	-12.8071	1.65687e-30	1.93575e-28	58.5569	8009417	KPNA2	down	3838
-0.267889	7.99303	-12.803	1.71562e-30	1.99738e-28	58.5224	8023382	MBD2	stable	8932
-0.342602	8.01318	-12.7906	1.90523e-30	2.2104e-28	58.4187	7925048	EGLN1	stable	54583
-0.205304	9.45505	-12.7876	1.95457e-30	2.25977e-28	58.3934	8043105	KCMF1	stable	56888
0.877366	8.19685	12.7799	2.08555e-30	2.40286e-28	58.3292	8152976	TMEM71	up	137835
-0.397779	5.15732	-12.7771	2.13678e-30	2.45339e-28	58.3052	7952274	NECTIN1	down	5818
-0.387578	9.11844	-12.7687	2.29281e-30	2.62349e-28	58.2355	8153021	ST3GAL1	stable	6482
-0.266091	8.20719	-12.7667	2.33319e-30	2.66055e-28	58.2182	7990165	PARP6	stable	56965
-0.312505	5.60392	-12.7589	2.49155e-30	2.83144e-28	58.1532	7920707	FAM189B	stable	10712
-0.317243	7.59637	-12.7578	2.51497e-30	2.84833e-28	58.1439	8045171	IMP4	stable	92856
-1.07219	7.15923	-12.7538	2.60242e-30	2.92746e-28	58.1101	8108256	MYOT	down	9499
-0.210807	10.0026	-12.7454	2.79253e-30	3.13074e-28	58.0404	7992646	ATP6V0C	stable	527
-0.426496	6.52039	-12.7377	2.97997e-30	3.31853e-28	57.9761	7934185	VSIR	down	64115
0.49961	7.40421	12.732	3.12703e-30	3.47069e-28	57.9284	8138370	ANKMY2	up	57037
0.325826	7.17465	12.7312	3.14965e-30	3.47954e-28	57.9213	8137448	GALNT11	stable	63917
-0.385321	8.12322	-12.731	3.1559e-30	3.47954e-28	57.9193	7899627	TINAGL1	stable	64129
-0.293295	8.20037	-12.7303	3.17459e-30	3.48859e-28	57.9135	8037152	GSK3A	stable	2931
-0.541505	7.72786	-12.7287	3.21659e-30	3.51169e-28	57.9005	7984319	MAP2K1	down	5604
-0.314379	5.5253	-12.722	3.40461e-30	3.70469e-28	57.8443	8087576	IFRD2	stable	7866
0.552104	5.7864	12.7025	4.01255e-30	4.35198e-28	57.6817	7929052	IFIT3	up	3437
0.54245	4.57211	12.6982	4.16149e-30	4.4878e-28	57.6457	7985238	ANKRD34C	up	390616
0.51673	5.79966	12.6953	4.26448e-30	4.58047e-28	57.6215	8046048	CSRNP3	up	80034
0.638144	6.86221	12.6873	4.56443e-30	4.88687e-28	57.5542	8096335	HERC6	up	55008
-0.291403	4.58224	-12.6858	4.6209e-30	4.93148e-28	57.5421	7901175	TSPAN1	stable	10103
-0.413598	6.02021	-12.6795	4.87414e-30	5.18512e-28	57.4893	8145889	EIF4EBP1	down	1978
0.325828	7.86676	12.6786	4.91268e-30	5.20947e-28	57.4815	8167125	USP11	stable	8237
0.368921	5.43346	12.673	5.14988e-30	5.44366e-28	57.4348	8056983	LOC100130691	stable	100130691
-0.301897	6.95945	-12.6679	5.37714e-30	5.66111e-28	57.3921	8040238	HPCAL1	stable	3241
0.227737	6.59391	12.6676	5.38959e-30	5.66111e-28	57.3898	7960143	ZNF84	stable	7637
0.360044	6.13155	12.6596	5.76494e-30	6.03633e-28	57.3232	8112439	CCDC125	stable	202243
-0.991873	5.51262	-12.6288	7.47847e-30	7.78158e-28	57.0657	7991335	ANPEP	down	290
-0.28117	7.65569	-12.6217	7.93885e-30	8.23488e-28	57.0066	8025766	CARM1	stable	10498
0.46238	9.9424	12.6089	8.83841e-30	9.13952e-28	56.9004	7954511	STK38L	up	23012
-0.427643	6.23321	-12.6082	8.89024e-30	9.16465e-28	56.8947	8018107	CDC42EP4	down	23580
0.331985	8.70112	12.6059	9.06877e-30	9.31985e-28	56.875	8079037	TRAK1	stable	22906
-0.267186	9.02593	-12.603	9.29337e-30	9.52127e-28	56.8508	8024623	NFIC	stable	4782
-0.356713	7.26536	-12.5911	1.02745e-29	1.04942e-27	56.7515	8025659	ATG4D	stable	84971
-0.461916	7.51454	-12.5872	1.06119e-29	1.08056e-27	56.7195	7956031	ORMDL2	down	29095
-0.970363	7.27484	-12.5748	1.17812e-29	1.19234e-27	56.6161	7968344	ALOX5AP	down	241
-1.07524	7.31063	-12.5734	1.19175e-29	1.20247e-27	56.6047	7956009	METTL7B	down	196410
0.450582	5.84101	12.5613	1.32004e-29	1.32789e-27	56.5036	8127201	COL21A1	up	81578
0.253862	9.72209	12.5527	1.41863e-29	1.42277e-27	56.4323	8139411	TMED4	stable	222068
0.421118	5.49103	12.5445	1.52051e-29	1.51582e-27	56.3637	8147079	LRRCC1	up	85444
0.586256	5.90466	12.5326	1.68032e-29	1.67014e-27	56.2648	8022559	ANKRD29	up	147463
-0.643352	8.55751	-12.5312	1.70007e-29	1.68474e-27	56.2533	7915472	SLC2A1	down	6513
0.186456	7.87302	12.5212	1.84917e-29	1.82706e-27	56.1701	8014551	SYNRG	stable	11276
0.27482	5.2773	12.5094	2.04306e-29	2.01266e-27	56.0715	7965264	CEP290	stable	80184
-0.267245	8.68883	-12.5086	2.05707e-29	2.02048e-27	56.0647	7898227	PLEKHM2	stable	23207
-0.314409	11.1301	-12.4881	2.44227e-29	2.38475e-27	55.8949	7961230	YBX3	stable	8531
0.642277	7.9361	12.4859	2.4887e-29	2.42299e-27	55.8763	8114805	FGF1	up	2246
0.641837	3.97907	12.4819	2.57249e-29	2.49588e-27	55.8435	8092541	LIPH	up	200879
-0.266417	9.55745	-12.4817	2.57856e-29	2.49588e-27	55.8412	7938528	PARVA	stable	55742
-0.307943	6.63963	-12.4794	2.62873e-29	2.53707e-27	55.8221	7996174	USB1	stable	79650
-0.247563	7.36077	-12.456	3.19921e-29	3.07873e-27	55.6278	8033118	MLLT1	stable	4298
0.463983	7.86269	12.4474	3.43765e-29	3.28918e-27	55.5567	7970473	XPO4	up	64328
0.399448	7.78221	12.4428	3.57457e-29	3.41038e-27	55.5181	8036813	ZNF780B	up	163131
0.388628	4.62032	12.4358	3.7907e-29	3.60626e-27	55.46	8025945	ZNF441	stable	126068
0.580579	6.82448	12.4175	4.41879e-29	4.19181e-27	55.3083	8067530	MIR1-1HG-AS1	up	253868
0.361892	7.35815	12.4168	4.44419e-29	4.20392e-27	55.3027	7949412	LTBP3	stable	4054
0.488118	8.92037	12.411	4.6656e-29	4.38202e-27	55.2546	8082886	PCCB	up	5096
-0.597294	4.83312	-12.4108	4.67194e-29	4.38202e-27	55.2532	8030782	SIGLEC9	down	27180
-0.326438	6.48773	-12.3897	5.57762e-29	5.2168e-27	55.078	8168045	EFNB1	stable	1947
0.393527	5.03755	12.3741	6.35567e-29	5.89484e-27	54.9488	7998190	RGS11	stable	8786
0.366785	5.66443	12.3625	7.00547e-29	6.47947e-27	54.8525	7994647	PRRT2	stable	112476
-0.42825	6.55148	-12.3585	7.24449e-29	6.68199e-27	54.8193	7965156	LIN7A	down	8825
-0.524031	7.4824	-12.3431	8.24064e-29	7.55892e-27	54.6918	7957052	CCT2	down	10576
0.189823	8.3517	12.3388	8.54115e-29	7.81304e-27	54.6564	8087380	USP4	stable	7375
0.319187	7.49839	12.3363	8.71848e-29	7.95341e-27	54.6361	7989365	RORA	stable	6095
-0.433132	6.69628	-12.3344	8.86394e-29	8.064e-27	54.6197	7931899	IL15RA	down	3601
0.429718	5.43661	12.3258	9.52358e-29	8.64051e-27	54.5487	8030914	ZNF610	up	162963
-0.365791	8.18522	-12.3248	9.60139e-29	8.67097e-27	54.5407	8051998	MCFD2	stable	90411
0.571602	8.32388	12.3247	9.60924e-29	8.67097e-27	54.5399	8042439	ANTXR1	up	84168
-0.320522	9.77141	-12.3206	9.94903e-29	8.95332e-27	54.5055	8110450	HNRNPAB	stable	3182
-0.375768	9.32347	-12.3164	1.03051e-28	9.2488e-27	54.4707	8091648	SSR3	stable	6747
0.2694	7.84011	12.3148	1.04394e-28	9.34411e-27	54.4579	8154059	SMARCA2	stable	6595
0.535826	7.75808	12.3088	1.09777e-28	9.79956e-27	54.4082	8098204	CPE	up	1363
-0.331104	8.51155	-12.2954	1.22732e-28	1.09267e-26	54.2978	8010820	FOXK2	stable	3607
-0.380003	5.01458	-12.2768	1.43415e-28	1.27341e-26	54.1438	7915392	HIVEP3	stable	59269
-0.427147	8.36215	-12.2594	1.6592e-28	1.46932e-26	53.9996	8121489	AMD1	down	262
-0.337202	6.27681	-12.25	1.7936e-28	1.58413e-26	53.9225	8041745	CAMKMT	stable	79823
-0.255499	6.6534	-12.2443	1.88156e-28	1.65742e-26	53.8752	7941900	RPS6KB2	stable	6199
-0.365596	5.58236	-12.2279	2.15705e-28	1.89009e-26	53.74	8079896	SEMA3F	stable	6405
-0.831375	7.95637	-12.2151	2.40034e-28	2.09774e-26	53.6343	8160297	PLIN2	down	123
0.403398	4.91246	12.1947	2.846e-28	2.48071e-26	53.4659	7946275	GVINP1	up	387751
-0.235135	7.16327	-12.1778	3.27462e-28	2.84687e-26	53.3271	7941179	CAPN1	stable	823
0.69369	7.25228	12.1553	3.95041e-28	3.40769e-26	53.1416	8101762	SNCA	up	6622
-0.349414	9.28714	-12.1508	4.09972e-28	3.52735e-26	53.1049	7974851	HIF1A	stable	3091
0.256836	7.46963	12.1345	4.69808e-28	4.03175e-26	52.9701	8106633	MSH3	stable	4437
-0.835395	5.15512	-12.133	4.75604e-28	4.071e-26	52.958	8048283	SLC11A1	down	6556
0.302506	7.66583	12.123	5.16866e-28	4.4107e-26	52.8757	8114814	NR3C1	stable	2908
-0.749156	6.27723	-12.1228	5.1794e-28	4.4107e-26	52.8737	7905571	S100A9	down	6280
0.536699	3.56621	12.1196	5.31823e-28	4.51738e-26	52.8475	8173752	RTL3	up	203430
-0.987173	6.79876	-12.1171	5.42825e-28	4.59909e-26	52.8272	7906720	FCER1G	down	2207
-0.306036	7.77379	-12.1054	5.98451e-28	5.03197e-26	52.7308	7914904	STK40	stable	83931
-0.277475	6.00327	-12.0993	6.29351e-28	5.27847e-26	52.681	7994637	MAZ	stable	4150
0.551326	7.93582	12.0939	6.58394e-28	5.50817e-26	52.6363	8014768	PLXDC1	up	57125
-0.676346	8.16592	-12.0903	6.78537e-28	5.66247e-26	52.6065	8066117	SAMHD1	down	25939
-0.404101	8.48861	-12.0852	7.0794e-28	5.89307e-26	52.5646	8073662	PARVB	down	29780
0.540147	4.57153	12.0833	7.18735e-28	5.96801e-26	52.5496	8138799	TRIL	up	9865
-0.326517	8.47198	-12.0774	7.55214e-28	6.25531e-26	52.5007	8085263	EMC3	stable	55831
-0.284359	9.62413	-12.0762	7.62531e-28	6.30025e-26	52.4911	8078350	TGFBR2	stable	7048
0.275976	7.49559	12.0749	7.70724e-28	6.35218e-26	52.4805	7943620	ATM	stable	472
0.217965	9.03368	12.0737	7.78585e-28	6.40112e-26	52.4705	8006239	NF1	stable	4763
0.791561	8.38076	12.0548	9.10969e-28	7.47106e-26	52.3152	7922130	DPT	up	1805
0.860774	5.04083	12.0527	9.27052e-28	7.58429e-26	52.2979	8135218	LRRC17	up	10234
-0.653595	7.72678	-12.0517	9.35037e-28	7.63086e-26	52.2894	8015846	MPP3	down	4356
-0.413334	6.72503	-12.0496	9.51318e-28	7.74475e-26	52.2723	7949619	SLC29A2	down	3177
-0.232165	7.69572	-12.0366	1.05957e-27	8.52183e-26	52.1658	8030470	AP2A1	stable	160
-0.297606	7.82199	-12.0276	1.14145e-27	9.15827e-26	52.0921	8025058	TRIP10	stable	9322
0.584993	7.12777	12.0258	1.15905e-27	9.2771e-26	52.077	8140971	SAMD9L	up	219285
-0.514963	7.11384	-12.0231	1.18492e-27	9.46147e-26	52.0552	8133670	POR	down	5447
1.03453	6.99462	12.0191	1.22537e-27	9.761e-26	52.022	8150428	SFRP1	up	6422
0.283499	6.07365	12.0166	1.25061e-27	9.93828e-26	52.0018	8171708	BCLAF3	stable	256643
0.598989	5.03582	12.009	1.33199e-27	1.05428e-25	51.9395	7945245	NTM	up	50863
-0.600816	4.35839	-12.0089	1.33301e-27	1.05428e-25	51.9387	8036787	FCGBP	down	8857
-0.256575	6.75465	-11.987	1.5983e-27	1.25516e-25	51.7592	8093130	RNF168	stable	165918
0.432466	4.88135	11.9787	1.71249e-27	1.34167e-25	51.691	8086183	LOC152048	up	152048
0.3125	5.31451	11.978	1.72139e-27	1.34547e-25	51.6858	8047006	ANKAR	stable	150709
-0.36845	8.12898	-11.9706	1.83063e-27	1.4275e-25	51.625	7910014	CNIH4	stable	29097
0.491441	6.21741	11.9666	1.8918e-27	1.47111e-25	51.5925	8056151	PLA2R1	up	22925
-0.285438	6.25783	-11.9664	1.89539e-27	1.47111e-25	51.5906	7992529	TRAF7	stable	84231
0.447086	4.39494	11.9635	1.94193e-27	1.48987e-25	51.5666	8096361	HERC5	up	51191
-0.371064	8.24219	-11.9613	1.97755e-27	1.51372e-25	51.5486	8087833	DUSP7	stable	1849
1.02228	6.96442	11.9594	2.00893e-27	1.5342e-25	51.5331	8119124	PI16	up	221476
0.602677	3.80766	11.9456	2.25197e-27	1.70418e-25	51.4201	7972670	CCDC168	up	643677
0.404233	7.39257	11.9439	2.28327e-27	1.72394e-25	51.4065	8064868	GPCPD1	up	56261
-0.482115	9.20526	-11.9396	2.36641e-27	1.78268e-25	51.3711	7945371	IFITM3	down	10410
0.339548	7.22346	11.9377	2.40404e-27	1.80694e-25	51.3555	7979328	ATG14	stable	22863
-0.335376	5.63092	-11.9277	2.6115e-27	1.95845e-25	51.2737	8099029	TNIP2	stable	79155
-0.950796	9.04778	-11.9239	2.69351e-27	2.01541e-25	51.2431	8025918	CNN1	down	1264
-0.276228	7.21168	-11.9225	2.7253e-27	2.03463e-25	51.2315	8085852	NGLY1	stable	55768
0.401197	4.31652	11.9151	2.89778e-27	2.15855e-25	51.1708	8005289	DRC3	up	83450
-0.435202	6.14183	-11.9044	3.16578e-27	2.35293e-25	51.0833	8146930	TMEM70	down	54968
-0.455894	8.26777	-11.8852	3.71061e-27	2.73369e-25	50.9263	8136918	ZYX	down	7791
0.78048	6.8998	11.8852	3.71093e-27	2.73369e-25	50.9262	7919815	CTSK	up	1513
0.272391	5.83236	11.8768	3.97583e-27	2.92237e-25	50.858	7996807	ZFP90	stable	146198
-0.514092	8.33833	-11.876	4.00284e-27	2.93574e-25	50.8513	7937330	IFITM2	down	10581
-0.230352	4.70113	-11.8659	4.35098e-27	3.14945e-25	50.7689	8084397	ECE2	stable	9718
-0.277853	6.70704	-11.8631	4.45152e-27	3.21524e-25	50.7463	8119034	BRPF3	stable	27154
-0.25592	7.98766	-11.8462	5.11809e-27	3.68868e-25	50.6083	8063893	ADRM1	stable	11047
-0.248757	8.25736	-11.8126	6.74967e-27	4.84362e-25	50.3347	8117834	PPP1R11	stable	6992
-0.483351	8.13683	-11.81	6.89823e-27	4.92898e-25	50.3131	8016708	LRRC59	down	55379
0.327635	9.51069	11.8031	7.29984e-27	5.20477e-25	50.2572	7899187	HMGN2	stable	3151
0.400755	5.34389	11.791	8.06822e-27	5.74033e-25	50.1582	8083978	NAALADL2	up	254827
-0.586183	8.00372	-11.7859	8.41194e-27	5.97212e-25	50.117	8029437	PVR	down	5817
0.380062	4.74941	11.7807	8.7775e-27	6.20882e-25	50.0749	8154416	CCDC171	stable	203238
-0.28162	7.3671	-11.7807	8.78263e-27	6.20882e-25	50.0743	8035249	NR2F6	stable	2063
-0.215267	6.44907	-11.7768	9.06916e-27	6.39779e-25	50.0426	7944418	C2CD2L	stable	9854
0.402922	8.47304	11.7757	9.15235e-27	6.44283e-25	50.0336	8124088	KIF13A	up	63971
-0.324357	6.37269	-11.7709	9.51736e-27	6.68565e-25	49.9949	7947570	TP53I11	stable	9537
0.303915	5.79878	11.768	9.74349e-27	6.83008e-25	49.9717	8051799	HAAO	stable	23498
0.345146	5.92572	11.7643	1.00479e-26	7.02694e-25	49.9413	7976128	TTC8	stable	123016
0.270832	8.34068	11.7641	1.00665e-26	7.02694e-25	49.9394	7972723	ARGLU1	stable	55082
-0.3745	11.2243	-11.7595	1.04499e-26	7.27927e-25	49.9025	8066214	TGM2	stable	7052
0.611488	5.4404	11.7524	1.10847e-26	7.70539e-25	49.8442	7933537	OGDHL	up	55753
0.514586	5.4716	11.7511	1.12033e-26	7.77162e-25	49.8336	8081686	BOC	up	91653
-0.416428	7.33079	-11.7396	1.23164e-26	8.52598e-25	49.74	8146649	MTFR1	down	9650
-0.357989	6.16455	-11.7291	1.34164e-26	9.26818e-25	49.6554	7991459	RGMA	stable	56963
0.437636	6.45518	11.7288	1.34531e-26	9.27429e-25	49.6527	8132055	MTURN	up	222166
-0.312305	6.02289	-11.7284	1.34968e-26	9.28519e-25	49.6495	8167270	FTSJ1	stable	24140
0.42007	6.86031	11.7246	1.39313e-26	9.56431e-25	49.6182	7985522	ADAMTSL3	up	57188
-0.289011	7.37785	-11.7019	1.67871e-26	1.14541e-24	49.4338	8159127	RXRA	stable	6256
-0.658399	5.24444	-11.7015	1.6841e-26	1.14674e-24	49.4306	8100507	HOPX	down	84525
0.394262	7.5391	11.6981	1.73135e-26	1.17651e-24	49.4032	8016390	COPZ2	up	51226
-0.270318	7.22063	-11.6949	1.77728e-26	1.2028e-24	49.3774	8024358	CSNK1G2	stable	1455
0.37396	8.65852	11.6912	1.83292e-26	1.23544e-24	49.3469	8111698	RICTOR	stable	253260
0.213387	10.0978	11.6859	1.91296e-26	1.28679e-24	49.3046	8076077	DDX17	stable	10521
-0.593986	6.05336	-11.6772	2.0551e-26	1.37684e-24	49.2338	7945232	ADAMTS15	down	170689
-0.304891	7.39973	-11.6693	2.19205e-26	1.46563e-24	49.17	8167287	PORCN	stable	64840
0.309929	6.46574	11.6687	2.20387e-26	1.47043e-24	49.1647	8069450	PRMT2	stable	3275
0.427422	5.64537	11.6579	2.40682e-26	1.5996e-24	49.0776	8054254	AFF3	up	3899
-0.273173	7.18375	-11.6514	2.53988e-26	1.6806e-24	49.0244	8167314	TBC1D25	stable	4943
-0.508119	4.58141	-11.6512	2.54383e-26	1.6806e-24	49.0228	8169378	RTL9	down	57529
-0.31113	5.94221	-11.6491	2.58762e-26	1.70614e-24	49.0059	7977646	ZNF219	stable	51222
0.289658	5.5895	11.6447	2.68352e-26	1.76587e-24	48.97	7976681	CYP46A1	stable	10858
0.426971	6.98473	11.6386	2.81972e-26	1.85184e-24	48.921	7916570	OMA1	up	115209
0.406304	5.36399	11.635	2.90482e-26	1.90397e-24	48.8916	8000013	ERI2	up	112479
0.418939	4.67353	11.6337	2.93557e-26	1.92035e-24	48.8812	7915425	ZMYND12	up	84217
-1.17022	5.3432	-11.6327	2.96038e-26	1.93278e-24	48.8729	8047300	AOX1	down	316
0.372993	5.98609	11.6154	3.4104e-26	2.22223e-24	48.733	8120222	EFHC1	stable	114327
-0.277761	7.23981	-11.5972	3.9581e-26	2.57408e-24	48.5857	7996455	E2F4	stable	1874
-1.09337	9.2172	-11.5937	4.07474e-26	2.64477e-24	48.557	7929653	ANKRD2	down	26287
-1.27463	6.99902	-11.5728	4.83136e-26	3.12369e-24	48.3886	7901256	CYP4B1	down	1580
0.257456	4.48154	11.5635	5.215e-26	3.36519e-24	48.3131	7930861	CASC2	stable	255082
-0.302006	8.30276	-11.5556	5.56337e-26	3.58305e-24	48.2492	7912374	SRM	stable	6723
-0.403287	7.40483	-11.5497	5.83481e-26	3.75061e-24	48.2021	8004521	MPDU1	down	9526
0.474318	5.89066	11.5396	6.33903e-26	4.06687e-24	48.1201	7979241	BMP4	up	652
0.551326	8.09041	11.5294	6.88867e-26	4.411e-24	48.0379	8057677	SLC40A1	up	30061
-0.385428	11.2947	-11.5217	7.33565e-26	4.6882e-24	47.9758	8159642	TUBB4B	stable	10383
-0.868015	4.83995	-11.5058	8.35012e-26	5.30599e-24	47.8477	7907396	C1orf105	down	92346
-0.62993	3.77437	-11.5054	8.38029e-26	5.31502e-24	47.8442	7901287	CYP4Z1	down	199974
0.324355	5.94687	11.5027	8.56853e-26	5.42408e-24	47.8222	7937782	TSPAN32	stable	10077
0.249048	6.27265	11.4931	9.26066e-26	5.85108e-24	47.7454	8039730	ZSCAN18	stable	65982
0.391007	9.11155	11.477	1.05599e-25	6.64673e-24	47.6156	8018966	TIMP2	stable	7077
0.281358	8.57048	11.4528	1.28647e-25	8.08218e-24	47.4205	8089299	CD47	stable	961
-0.310719	7.45512	-11.4519	1.29643e-25	8.12941e-24	47.4128	8013923	GIT1	stable	28964
0.823331	7.05512	11.4353	1.48371e-25	9.26889e-24	47.2795	8146863	SULF1	up	23213
0.288745	7.64147	11.4348	1.48993e-25	9.29032e-24	47.2753	7974125	TOGARAM1	stable	23116
-0.299974	7.74936	-11.4336	1.50405e-25	9.36081e-24	47.266	8025183	MCOLN1	stable	57192
-0.275573	8.39805	-11.4299	1.54971e-25	9.62699e-24	47.2364	8175299	RTL8B	stable	441518
0.607979	6.02239	11.4263	1.59649e-25	9.89912e-24	47.207	8075483	PIK3IP1	up	113791
-0.353478	8.40097	-11.4228	1.64212e-25	1.01632e-23	47.1792	8130739	RPS6KA2	stable	6196
-0.380424	7.47298	-11.4225	1.64645e-25	1.0171e-23	47.1766	8019263	ARHGDIA	stable	396
-0.219495	7.58268	-11.4146	1.75577e-25	1.08063e-23	47.113	8167165	ARAF	stable	369
0.308603	4.70345	11.4097	1.82733e-25	1.1226e-23	47.0735	8028770	ZNF546	stable	339327
0.448854	6.60106	11.4019	1.94655e-25	1.19363e-23	47.0111	8098041	TMEM144	up	55314
0.320107	4.30343	11.3991	1.99146e-25	1.21817e-23	46.9885	7990333	CYP11A1	stable	1583
0.241872	8.08771	11.3954	2.05168e-25	1.25119e-23	46.9591	8134318	CASD1	stable	64921
-0.560553	8.00769	-11.3918	2.11359e-25	1.2819e-23	46.9297	8175023	ZDHHC9	down	51114
0.454896	6.21611	11.3882	2.17632e-25	1.31277e-23	46.9008	8037970	PLA2G4C	up	8605
0.314722	4.01695	11.3766	2.39121e-25	1.43721e-23	46.8077	8133983	ADAM22	stable	53616
-0.703771	6.09508	-11.3766	2.39125e-25	1.43721e-23	46.8077	7927215	ALOX5	down	240
-0.340698	9.064	-11.3748	2.42586e-25	1.45538e-23	46.7935	8076365	DESI1	stable	27351
-0.319074	5.89463	-11.3737	2.44715e-25	1.46551e-23	46.7849	8175977	IRAK1	stable	3654
-0.200323	8.60664	-11.3665	2.59583e-25	1.55177e-23	46.7265	8164177	MAPKAP1	stable	79109
0.407751	4.17124	11.362	2.69215e-25	1.60646e-23	46.6905	7906443	FCER1A	up	2205
0.541759	6.49303	11.3516	2.92883e-25	1.74457e-23	46.6072	8081081	EPHA3	up	2042
-0.230303	6.22314	-11.3475	3.02744e-25	1.80008e-23	46.5745	8172561	PRICKLE3	stable	4007
-0.327793	9.41008	-11.3466	3.05011e-25	1.81033e-23	46.5671	8099340	WDR1	stable	9948
-0.293559	8.55607	-11.3365	3.31055e-25	1.95793e-23	46.4862	8081838	ARHGAP31	stable	57514
-0.255301	7.76631	-11.3337	3.38627e-25	1.99916e-23	46.4638	7999173	UBALD1	stable	124402
0.512419	7.87389	11.3234	3.68e-25	2.16489e-23	46.3816	7953166	TSPAN9	up	10867
-0.570001	7.7664	-11.323	3.69412e-25	2.16937e-23	46.3778	7958174	TXNRD1	down	7296
-0.874601	7.94035	-11.3137	3.9833e-25	2.33507e-23	46.3033	7914270	LAPTM5	down	7805
0.305128	5.36128	11.3031	4.34034e-25	2.52658e-23	46.2185	7949400	SLC25A45	stable	283130
0.412159	8.09065	11.2946	4.64915e-25	2.70162e-23	46.1505	8008819	YPEL2	up	388403
-0.491391	6.88923	-11.2875	4.92347e-25	2.85032e-23	46.0939	7905116	PLEKHO1	down	51177
-0.402276	6.58546	-11.2873	4.93073e-25	2.85032e-23	46.0924	8133477	GTF2IRD1	down	9569
0.236708	7.93672	11.2827	5.11613e-25	2.95237e-23	46.0559	8105633	PPWD1	stable	23398
0.341003	6.89693	11.2825	5.12709e-25	2.95358e-23	46.0538	8076547	TTLL1	stable	25809
0.463878	5.13539	11.2771	5.35353e-25	3.07869e-23	46.0111	8139873	LINC00174	up	285908
0.450881	6.17587	11.2731	5.52992e-25	3.17465e-23	45.9791	8053797	ANKRD36C	up	400986
-0.411808	5.8651	-11.2565	6.32453e-25	3.61835e-23	45.8464	7925492	OPN3	down	23596
-0.261746	6.3413	-11.242	7.11243e-25	4.05518e-23	45.7303	8137352	SLC4A2	stable	6522
0.442895	5.6056	11.2396	7.25188e-25	4.12762e-23	45.7111	8094190	CC2D2A	up	57545
0.313608	8.4346	11.2354	7.50141e-25	4.26236e-23	45.6777	8001658	CFAP20	stable	29105
0.376853	7.67746	11.2326	7.6757e-25	4.35397e-23	45.655	7961440	PLBD1	stable	79887
0.303126	7.47638	11.2286	7.92805e-25	4.48946e-23	45.623	8014825	FBXL20	stable	84961
-0.367877	6.23722	-11.2221	8.3564e-25	4.72399e-23	45.571	8065855	EDEM2	stable	55741
-0.395581	5.00091	-11.2199	8.50214e-25	4.79823e-23	45.5539	7946853	KCNJ11	down	3767
-0.248066	6.33603	-11.2113	9.1131e-25	5.13433e-23	45.4853	8018379	CASKIN2	stable	57513
-0.342568	8.12635	-11.2014	9.87139e-25	5.54279e-23	45.4064	7910001	DEGS1	stable	8560
-0.444634	8.38863	-11.2003	9.96206e-25	5.58429e-23	45.3973	7933760	CCDC6	down	8030
0.302105	6.74667	11.1963	1.02857e-24	5.74638e-23	45.3657	8140129	ABHD11	stable	83451
-0.657141	4.90866	-11.1932	1.0549e-24	5.87376e-23	45.3407	8038899	FPR1	down	2357
-0.283323	6.62191	-11.1849	1.1275e-24	6.26753e-23	45.275	7993114	METTL22	stable	79091
-0.409571	6.32908	-11.1625	1.35146e-24	7.48746e-23	45.0959	8066848	PREX1	down	57580
0.30987	8.32028	11.1601	1.37693e-24	7.6159e-23	45.0775	7930380	ADD3	stable	120
-0.728551	8.4006	-11.1597	1.38226e-24	7.63271e-23	45.0736	7963786	ITGA5	down	3678
0.266485	6.23822	11.1531	1.45761e-24	8.03544e-23	45.0212	7915529	HYI	stable	81888
-0.226047	8.12159	-11.1518	1.47274e-24	8.10543e-23	45.011	8109999	ERGIC1	stable	57222
0.331912	4.93212	11.15	1.49472e-24	8.21282e-23	44.9963	7975292	RAD51B	stable	5890
0.435022	5.34814	11.1488	1.5084e-24	8.27432e-23	44.9873	8109938	RANBP17	up	64901
0.575494	4.86581	11.1467	1.53456e-24	8.40397e-23	44.9703	8161892	GNA14	up	9630
-0.363549	5.22967	-11.1444	1.56285e-24	8.54486e-23	44.9523	7999253	PPL	stable	5493
0.271755	9.5508	11.1403	1.61513e-24	8.81621e-23	44.9198	8091954	GOLIM4	stable	27333
0.625336	5.16737	11.1371	1.6574e-24	9.03213e-23	44.8942	8040080	RSAD2	up	91543
-0.317722	7.43823	-11.1136	2.00204e-24	1.08747e-22	44.7076	7933010	PARD3	stable	56288
-0.690406	8.85325	-11.1081	2.09413e-24	1.13379e-22	44.6631	8046160	KLHL41	down	10324
-0.190138	7.57403	-11.1046	2.15393e-24	1.16427e-22	44.6353	7996919	VPS4A	stable	27183
0.35583	6.91289	11.104	2.16319e-24	1.16739e-22	44.6311	8106107	PTCD2	stable	79810
0.573541	5.30855	11.1018	2.20251e-24	1.18668e-22	44.6133	8128837	METTL24	up	728464
0.372627	5.25626	11.0912	2.39711e-24	1.28945e-22	44.5296	8067932	MIR99AHG	stable	388815
-0.524947	6.89937	-11.0866	2.48736e-24	1.33583e-22	44.4931	7942400	P2RY2	down	5029
-0.235522	7.2002	-11.079	2.64436e-24	1.41331e-22	44.4326	8060705	MAVS	stable	57506
-0.328452	7.04815	-11.076	2.70977e-24	1.44595e-22	44.4084	8141107	SLC25A13	stable	10165
0.455938	7.7369	11.0645	2.97192e-24	1.58329e-22	44.3172	8060897	PLCB4	up	5332
-0.213421	7.3647	-11.0632	3.00234e-24	1.59695e-22	44.3071	8004030	RNF167	stable	26001
0.667242	4.47935	11.0617	3.03814e-24	1.61341e-22	44.2954	7980485	DIO2	up	1734
-0.511157	6.57472	-11.0568	3.16149e-24	1.67358e-22	44.2561	8072360	TCN2	down	6948
-0.467508	4.00243	-11.0561	3.17805e-24	1.67967e-22	44.2509	8128818	WASF1	down	8936
0.272795	6.30087	11.052	3.28395e-24	1.7329e-22	44.2185	8075493	PATZ1	stable	23598
0.457628	5.93516	11.0499	3.34064e-24	1.76002e-22	44.2016	7918925	TRIM45	up	80263
0.187218	8.50785	11.0462	3.44074e-24	1.80989e-22	44.1724	7899957	ZMYM4	stable	9202
-0.311739	6.29902	-11.0452	3.4682e-24	1.82146e-22	44.1646	8077663	JAGN1	stable	84522
-0.72789	6.98941	-11.0408	3.5927e-24	1.88388e-22	44.1297	7955179	TUBA1C	down	84790
0.44904	7.75225	11.04	3.61804e-24	1.89418e-22	44.1228	8001507	BBS2	up	583
0.717943	6.74427	11.035	3.76405e-24	1.96445e-22	44.0837	8163202	SVEP1	up	79987
-0.243464	8.95405	-11.0344	3.78297e-24	1.97123e-22	44.0788	7902771	SH3GLB1	stable	51100
-0.961354	5.4702	-11.0338	3.80219e-24	1.97815e-22	44.0737	8091723	RARRES1	down	5918
0.5981	5.91281	11.0336	3.80879e-24	1.97849e-22	44.072	7951077	SESN3	up	143686
-0.635384	5.71461	-11.0189	4.28338e-24	2.22155e-22	43.956	7986068	BLM	down	641
0.412708	5.59869	11.0166	4.36519e-24	2.26046e-22	43.9373	8174576	AMOT	up	154796
-0.740663	6.82316	-11.0149	4.4231e-24	2.28689e-22	43.9243	8083136	ATP1B3	down	483
-0.444968	6.31846	-11.0118	4.53579e-24	2.34152e-22	43.8994	8032909	PLIN3	down	10226
0.254202	7.25377	11.009	4.63623e-24	2.38967e-22	43.8778	7967881	MPHOSPH8	stable	54737
-0.283123	10.5969	-11.0072	4.70326e-24	2.42004e-22	43.8636	7966368	PPP1CC	stable	5501
-0.619946	7.34232	-11.0071	4.70969e-24	2.42004e-22	43.8622	7997642	CRISPLD2	down	83716
-0.213259	7.00101	-11.0056	4.76699e-24	2.44571e-22	43.8503	8025028	CLPP	stable	8192
-0.345683	5.63118	-11.0052	4.77902e-24	2.44811e-22	43.8478	7939590	SLC35C1	stable	55343
-0.223908	6.87708	-10.992	5.31512e-24	2.71438e-22	43.7428	7920912	UBQLN4	stable	56893
-0.750153	8.46012	-10.9828	5.72099e-24	2.91718e-22	43.67	8085360	TIMP4	down	7079
-0.243934	6.34324	-10.9793	5.88276e-24	2.99508e-22	43.6425	8076225	RPS19BP1	stable	91582
-0.311497	8.68334	-10.9705	6.309e-24	3.20719e-22	43.5734	8063211	NCOA3	stable	8202
-0.228885	7.1776	-10.9687	6.40394e-24	3.25049e-22	43.5586	8039413	PPP6R1	stable	22870
0.381598	5.25523	10.9621	6.7512e-24	3.42153e-22	43.5064	7935510	MORN4	stable	118812
-0.455685	3.72542	-10.9601	6.85954e-24	3.47116e-22	43.4907	8080562	IL17RB	down	55540
-0.290022	8.73432	-10.9578	6.98753e-24	3.53056e-22	43.4724	7996772	SLC7A6	stable	9057
-0.305715	8.73328	-10.9569	7.03678e-24	3.55005e-22	43.4655	8115918	CLTB	stable	1212
-0.316737	9.55461	-10.9487	7.5131e-24	3.78462e-22	43.4008	8007302	TUBG1	stable	7283
-0.256363	8.56225	-10.9467	7.63205e-24	3.83452e-22	43.3853	8175302	RTL8A	stable	26071
0.883384	6.68068	10.9467	7.63517e-24	3.83452e-22	43.3849	8162388	OMD	up	4958
0.207227	8.07799	10.9464	7.65279e-24	3.83757e-22	43.3826	7962499	SCAF11	stable	9169
-0.23752	7.84114	-10.9461	7.67208e-24	3.84146e-22	43.3801	7906235	PRCC	stable	5546
-0.250379	6.12087	-10.9361	8.31081e-24	4.15503e-22	43.3011	8159692	ARRDC1	stable	92714
0.453328	6.8964	10.9254	9.05337e-24	4.51272e-22	43.2165	7930703	TRUB1	up	142940
-0.372468	7.34807	-10.9249	9.08861e-24	4.52352e-22	43.2127	8064502	SNRPB	stable	6628
0.396635	5.48185	10.9185	9.55871e-24	4.74331e-22	43.1629	8044225	SULT1C4	up	27233
-0.228726	7.11208	-10.9087	1.03422e-23	5.12447e-22	43.085	8020527	RMC1	stable	29919
0.348942	5.51006	10.907	1.04847e-23	5.17968e-22	43.0715	8041867	MSH2	stable	4436
-0.216218	7.41184	-10.9031	1.08166e-23	5.32016e-22	43.0407	8051097	EIF2B4	stable	8890
-0.37407	6.76306	-10.903	1.0817e-23	5.32016e-22	43.0407	8071069	IL17RA	stable	23765
-0.333057	5.73276	-10.9025	1.08642e-23	5.33548e-22	43.0364	8098177	KLHL2	stable	11275
-0.610154	6.22284	-10.8994	1.11378e-23	5.46176e-22	43.0118	8094240	CD38	down	952
0.308039	4.80858	10.8973	1.13207e-23	5.54332e-22	42.9957	8130408	IPCEF1	stable	26034
-0.351779	4.98815	-10.8933	1.16919e-23	5.71665e-22	42.9639	7922001	FAM78B	stable	149297
0.396343	6.82708	10.8849	1.25016e-23	6.09468e-22	42.8977	7949650	CTSF	up	8722
-0.415221	5.05481	-10.883	1.26919e-23	6.17842e-22	42.8828	7899750	FAM167B	down	84734
0.502638	8.87959	10.8807	1.29251e-23	6.28272e-22	42.8648	7933194	CXCL12	up	6387
-0.247908	9.05433	-10.8796	1.30448e-23	6.33168e-22	42.8557	7944978	EI24	stable	9538
-0.279877	8.64763	-10.8783	1.318e-23	6.38801e-22	42.8455	7899737	EIF3I	stable	8668
0.302517	6.2605	10.8719	1.38624e-23	6.69921e-22	42.7956	7975851	IFT43	stable	112752
0.46936	7.00572	10.8707	1.40013e-23	6.75653e-22	42.7858	7907492	RABGAP1L	up	9910
-0.396344	7.3405	-10.8686	1.4232e-23	6.85792e-22	42.7696	7956401	SHMT2	down	6472
0.315118	4.84424	10.8676	1.43498e-23	6.90472e-22	42.7615	8035765	ZNF14	stable	7561
0.196078	9.16498	10.8667	1.4452e-23	6.94383e-22	42.7545	7926916	ZEB1	stable	6935
0.544258	6.96723	10.8651	1.46406e-23	7.0243e-22	42.7417	7917875	F3	up	2152
-0.193078	8.13361	-10.863	1.48828e-23	7.13024e-22	42.7255	8087685	TMEM115	stable	11070
-0.937467	5.32652	-10.8528	1.61441e-23	7.72344e-22	42.6451	8043981	IL1R2	down	7850
-0.371643	7.21742	-10.8468	1.69387e-23	8.09193e-22	42.5976	8172520	TFE3	stable	7030
0.323662	4.9993	10.8465	1.6981e-23	8.1005e-22	42.5952	8041519	RMDN2	stable	151393
0.416002	5.29817	10.8391	1.80012e-23	8.56268e-22	42.5375	7899851	AZIN2	up	113451
0.345792	5.63117	10.8328	1.89353e-23	8.98133e-22	42.4875	8058350	ICA1L	stable	130026
0.524989	9.25498	10.8256	2.00423e-23	9.49287e-22	42.4314	7958960	TPCN1	up	53373
-0.550798	7.54316	-10.8244	2.02321e-23	9.56914e-22	42.4221	8151423	JPH1	down	56704
-0.255302	6.74203	-10.8222	2.05953e-23	9.72714e-22	42.4045	8077042	SBF1	stable	6305
-0.390036	5.73464	-10.8191	2.11043e-23	9.95338e-22	42.3804	8014794	CACNB1	stable	782
0.410813	6.43087	10.8178	2.13249e-23	1.00432e-21	42.3701	7958761	ACAD10	up	80724
-0.442075	7.61074	-10.8145	2.1894e-23	1.02967e-21	42.3441	8009353	PITPNC1	down	26207
-0.3204	9.14299	-10.8083	2.29997e-23	1.07888e-21	42.2954	8082408	SEC61A1	stable	29927
-0.29468	6.8172	-10.8083	2.30051e-23	1.07888e-21	42.2952	8035886	C19orf12	stable	83636
-0.189383	8.5246	-10.8049	2.36307e-23	1.10665e-21	42.2687	7920515	UBE2Q1	stable	55585
0.285307	7.23377	10.7925	2.60767e-23	1.21949e-21	42.1714	7933105	ZNF25	stable	219749
-0.212162	9.12746	-10.7867	2.73033e-23	1.27506e-21	42.126	8167103	CDK16	stable	5127
-0.48649	6.7382	-10.7849	2.76944e-23	1.29152e-21	42.112	8050766	ADCY3	down	109
0.295313	6.94924	10.7844	2.78108e-23	1.29513e-21	42.1078	7943297	CEP57	stable	9702
0.322918	6.41601	10.7832	2.80699e-23	1.30537e-21	42.0986	7905339	GABPB2	stable	126626
-0.724059	6.96641	-10.7824	2.82634e-23	1.31253e-21	42.0919	7970810	SLC7A1	down	6541
-0.519174	5.88735	-10.7816	2.84347e-23	1.31865e-21	42.0859	8035201	CPAMD8	down	27151
0.393911	6.27348	10.7608	3.35314e-23	1.55069e-21	41.923	8014264	PEX12	stable	5193
-0.23706	8.82657	-10.7603	3.36771e-23	1.55311e-21	41.9187	8082788	CDV3	stable	55573
0.255008	7.19144	10.753	3.56698e-23	1.64273e-21	41.862	7980403	VIPAS39	stable	63894
0.436215	8.82285	10.7518	3.6026e-23	1.65685e-21	41.8521	7903404	RNPC3	up	55599
-0.241924	7.32183	-10.7511	3.62185e-23	1.6634e-21	41.8469	7978208	TINF2	stable	26277
-0.626273	5.04399	-10.7454	3.79046e-23	1.73844e-21	41.8019	8088142	CHDH	down	55349
-0.206606	8.45167	-10.7451	3.79787e-23	1.73945e-21	41.8	8032418	AP3D1	stable	8943
0.231553	5.88597	10.743	3.86183e-23	1.76631e-21	41.7835	7994620	KIF22	stable	3835
0.279856	6.93793	10.7399	3.95736e-23	1.80752e-21	41.7594	8030931	ZNF528	stable	84436
0.367353	7.66676	10.7387	3.99596e-23	1.82265e-21	41.7498	7928671	TMEM254	stable	80195
0.455213	7.20398	10.7361	4.07738e-23	1.85724e-21	41.7299	8138353	MEOX2	up	4223
0.209982	6.83943	10.735	4.11508e-23	1.87186e-21	41.7208	8119858	POLH	stable	5429
-0.388613	6.98881	-10.7313	4.23809e-23	1.92518e-21	41.6917	7953321	LTBR	stable	4055
-0.282007	6.25156	-10.7286	4.32838e-23	1.96352e-21	41.6708	8003875	SPNS2	stable	124976
-0.220568	9.09027	-10.7233	4.51579e-23	2.04575e-21	41.629	7946815	PIK3C2A	stable	5286
-0.209874	8.37633	-10.7092	5.0474e-23	2.2742e-21	41.519	8124828	FLOT1	stable	10211
0.235796	7.49151	10.706	5.17605e-23	2.32901e-21	41.4942	7971422	ZC3H13	stable	23091
0.332844	6.24029	10.7058	5.18393e-23	2.32941e-21	41.4927	7907486	ZBTB37	stable	84614
0.26148	7.75472	10.7052	5.21086e-23	2.33836e-21	41.4876	8151254	NCOA2	stable	10499
-0.396602	3.76747	-10.6996	5.44667e-23	2.44089e-21	41.4439	7923907	IL10	down	3586
0.286355	8.11276	10.6905	5.85248e-23	2.61922e-21	41.3729	8121043	ORC3	stable	23595
-0.234751	6.85536	-10.6863	6.04887e-23	2.69986e-21	41.3403	8155312	DCAF10	stable	79269
-0.240843	8.31216	-10.6816	6.27721e-23	2.79428e-21	41.3037	8040927	NRBP1	stable	29959
0.240281	2.97607	10.6787	6.42218e-23	2.855e-21	41.2811	8076094	DMC1	stable	11144
-0.282809	8.1545	-10.678	6.46064e-23	2.86827e-21	41.2752	7990417	SCAMP2	stable	10066
0.200997	5.59175	10.67	6.87929e-23	3.05006e-21	41.2132	8027272	ZNF85	stable	7639
0.273319	5.12444	10.6629	7.27847e-23	3.22276e-21	41.1575	8051793	OXER1	stable	165140
0.794658	5.99419	10.6614	7.36556e-23	3.25267e-21	41.1457	8095043	RASL11B	up	65997
-0.448307	3.39957	-10.6602	7.43638e-23	3.27959e-21	41.1363	7920278	S100A3	down	6274
0.464675	6.36669	10.658	7.56447e-23	3.33038e-21	41.1194	8004545	ATP1B2	up	482
-0.352227	5.94055	-10.6579	7.57154e-23	3.33038e-21	41.1185	8165552	NSMF	stable	26012
-0.217169	10.5782	-10.6456	8.34221e-23	3.66452e-21	41.0228	7906564	PEA15	stable	8682
0.2277	7.02208	10.6361	8.99467e-23	3.94592e-21	40.9484	7923889	EIF2D	stable	1939
0.290809	5.89023	10.6326	9.2433e-23	4.04966e-21	40.9215	8155148	TMEM8B	stable	51754
-0.307874	6.86102	-10.6296	9.46834e-23	4.1428e-21	40.8977	8090277	OSBPL11	stable	114885
-0.455976	5.41268	-10.6281	9.58109e-23	4.18663e-21	40.886	8013015	CENPV	down	201161
0.306896	7.79401	10.6261	9.7325e-23	4.24166e-21	40.8705	7987981	UBR1	stable	197131
0.260687	5.84727	10.623	9.9726e-23	4.34062e-21	40.8465	7897339	CAMTA1	stable	23261
0.267531	8.36446	10.6214	1.00989e-22	4.38985e-21	40.834	8085081	CRBN	stable	51185
-0.209523	8.4118	-10.6211	1.01197e-22	4.39319e-21	40.832	8111331	GOLPH3	stable	64083
0.318903	5.36222	10.6201	1.01992e-22	4.41616e-21	40.8243	8174092	ARMCX2	stable	9823
0.285626	5.09331	10.6122	1.08569e-22	4.68877e-21	40.7625	8173174	USP51	stable	158880
-0.58092	3.80902	-10.6099	1.10592e-22	4.76541e-21	40.7443	8100798	SULT1B1	down	27284
-0.736213	5.85802	-10.6098	1.1063e-22	4.76541e-21	40.744	8021653	SERPINB8	down	5271
-0.212615	8.03284	-10.6064	1.13662e-22	4.88335e-21	40.7173	8035177	SLC35E1	stable	79939
-0.217473	7.26452	-10.5993	1.20194e-22	5.15733e-21	40.6621	8098705	MTRF1L	stable	54516
-0.287612	5.05758	-10.5955	1.23903e-22	5.30966e-21	40.6321	7970395	TUBA3C	stable	7278
-0.262903	6.12427	-10.5911	1.28264e-22	5.48948e-21	40.5979	7912898	ATP13A2	stable	23400
0.384843	6.64075	10.5645	1.58053e-22	6.72978e-21	40.3917	7913824	RSRP1	stable	57035
-0.490644	5.96687	-10.5598	1.64051e-22	6.97626e-21	40.3549	8172056	RPGR	down	6103
0.417041	8.37293	10.5532	1.72714e-22	7.33526e-21	40.3041	8095585	SLC4A4	up	8671
0.385716	6.10028	10.5493	1.78199e-22	7.55858e-21	40.2732	8173647	ZDHHC15	stable	158866
-0.52151	5.85632	-10.5489	1.78645e-22	7.56788e-21	40.2707	8056327	GRB14	down	2888
-0.34088	5.52617	-10.5454	1.83709e-22	7.77251e-21	40.2431	8090469	GATA2	stable	2624
0.259983	3.39524	10.5438	1.8603e-22	7.86073e-21	40.2307	8114171	CDKL3	stable	51265
-0.428109	5.12124	-10.5424	1.88023e-22	7.93484e-21	40.2202	8072346	MTFP1	down	51537
0.293727	6.41722	10.5419	1.88789e-22	7.95709e-21	40.2162	8117667	ZSCAN26	stable	7741
-0.329654	6.50967	-10.5392	1.9283e-22	8.11713e-21	40.1953	7961865	KRAS	stable	3845
0.26745	6.62108	10.5382	1.94336e-22	8.17019e-21	40.1876	8042737	ALMS1	stable	7840
-0.244689	7.9278	-10.5356	1.98357e-22	8.32876e-21	40.1673	8126371	CCND3	stable	896
0.226654	8.30952	10.5342	2.00574e-22	8.40697e-21	40.1564	7944223	KMT2A	stable	4297
-0.271366	6.07954	-10.5341	2.00725e-22	8.40697e-21	40.1556	8030035	GRWD1	stable	83743
0.449533	8.77822	10.5326	2.03185e-22	8.49931e-21	40.1436	8081590	PHLDB2	up	90102
0.419803	5.55743	10.5249	2.15824e-22	9.01666e-21	40.084	7926708	THNSL1	up	79896
0.262726	5.06548	10.5181	2.27671e-22	9.4997e-21	40.0312	8016909	MKS1	stable	54903
-0.304687	9.81802	-10.5121	2.38552e-22	9.94124e-21	39.9851	7988753	SPPL2A	stable	84888
0.204735	8.47383	10.5118	2.39124e-22	9.95263e-21	39.9828	8079869	RBM5	stable	10181
-0.220264	7.14248	-10.5113	2.40036e-22	9.97811e-21	39.979	8034983	BRD4	stable	23476
-0.345055	6.95544	-10.5106	2.41511e-22	1.00269e-20	39.973	7987165	AVEN	stable	57099
0.250937	7.04893	10.5069	2.48559e-22	1.03067e-20	39.9445	8040985	ZNF512	stable	84450
0.834218	7.84445	10.5054	2.51558e-22	1.04181e-20	39.9327	8104746	NPR3	up	4883
-0.539563	7.94596	-10.5029	2.56362e-22	1.06038e-20	39.914	7959893	ADGRD1	down	283383
-0.456833	9.65324	-10.5002	2.61917e-22	1.08201e-20	39.8929	8007100	IGFBP4	down	3487
-0.246606	5.72365	-10.4989	2.64712e-22	1.09086e-20	39.8824	8158380	PKN3	stable	29941
0.236671	5.91995	10.4899	2.84078e-22	1.16777e-20	39.8127	8080001	HEMK1	stable	51409
-0.262329	7.93811	-10.4886	2.86867e-22	1.17778e-20	39.803	8014882	MIEN1	stable	84299
-0.876729	6.49063	-10.4784	3.10819e-22	1.27455e-20	39.7238	8116418	GFPT2	down	9945
-0.765769	7.64279	-10.4775	3.12914e-22	1.28156e-20	39.7172	8090823	SLCO2A1	down	6578
0.270837	8.63409	10.4743	3.20912e-22	1.3127e-20	39.6923	7990020	ANP32A	stable	8125
0.360764	6.98505	10.47	3.3196e-22	1.35623e-20	39.6588	8160332	MLLT3	stable	4300
0.273897	9.70086	10.4663	3.41797e-22	1.39471e-20	39.63	8005765	WSB1	stable	26118
0.297136	6.15998	10.4655	3.43807e-22	1.40119e-20	39.6242	8091087	NMNAT3	stable	349565
-0.447901	7.62009	-10.4609	3.56301e-22	1.45034e-20	39.589	8042356	MEIS1	down	4211
0.24386	6.99194	10.4591	3.61519e-22	1.46978e-20	39.5746	7963244	TFCP2	stable	7024
0.26338	7.91059	10.4588	3.62315e-22	1.47122e-20	39.5724	7958439	USP30	stable	84749
0.229754	8.69572	10.4567	3.68402e-22	1.4923e-20	39.556	7944623	TBCEL	stable	219899
0.643785	6.10867	10.4523	3.81286e-22	1.54074e-20	39.522	8101587	MAPK10	up	5602
0.44829	4.92388	10.452	3.82141e-22	1.54232e-20	39.5198	8114354	NME5	up	8382
-0.294376	5.25722	-10.4518	3.82689e-22	1.54266e-20	39.5184	8099326	SLC2A9	stable	56606
0.286532	9.25293	10.4502	3.87475e-22	1.55818e-20	39.5061	7975368	SRSF5	stable	6430
-0.236066	7.20102	-10.4499	3.88504e-22	1.56044e-20	39.5035	7921793	DEDD	stable	9191
0.284797	5.9434	10.4483	3.93253e-22	1.57761e-20	39.4915	8025927	ZNF627	stable	199692
0.421779	4.61453	10.4474	3.96206e-22	1.58754e-20	39.4841	8072088	SEZ6L	up	23544
-0.233549	7.44937	-10.4402	4.18992e-22	1.67682e-20	39.4289	8013776	FAM222B	stable	55731
-0.361989	8.68968	-10.4343	4.39063e-22	1.75504e-20	39.3827	7917741	TMED5	stable	50999
-0.225665	7.80558	-10.4305	4.51994e-22	1.80456e-20	39.3541	7971134	PROSER1	stable	80209
0.469641	5.64239	10.4303	4.52958e-22	1.80625e-20	39.352	7903507	FAM102B	up	284611
0.484661	5.85032	10.4251	4.7177e-22	1.87901e-20	39.3118	7976795	MEG3	up	55384
-0.459263	6.48258	-10.423	4.79605e-22	1.90793e-20	39.2955	7898693	ALPL	down	249
0.294058	6.62106	10.417	5.02416e-22	1.99629e-20	39.2496	8042195	AHSA2P	stable	130872
0.362991	5.81673	10.4058	5.48219e-22	2.17569e-20	39.1635	8103728	HMGB2	stable	3148
0.452471	5.10245	10.4035	5.58444e-22	2.21363e-20	39.1452	8113483	TMEM232	up	642987
0.199673	8.71741	10.4019	5.65157e-22	2.23758e-20	39.1334	8013486	USP22	stable	23326
-0.245488	5.33844	-10.4017	5.66398e-22	2.23983e-20	39.1313	8034806	DDX39A	stable	10212
0.459864	7.3347	10.4004	5.7202e-22	2.25938e-20	39.1215	8091243	PCOLCE2	up	26577
0.217526	7.73095	10.3944	5.99236e-22	2.35848e-20	39.0756	7985119	HMG20A	stable	10363
0.245903	7.84176	10.392	6.10669e-22	2.40064e-20	39.057	7921970	ALDH9A1	stable	223
0.289827	9.72924	10.3908	6.16485e-22	2.42065e-20	39.0476	8090193	HEG1	stable	57493
0.350105	6.07552	10.3898	6.21235e-22	2.43356e-20	39.04	7919715	ANP32E	stable	81611
0.30594	6.98529	10.3784	6.79e-22	2.65049e-20	38.9523	8117020	MYLIP	stable	29116
-0.649449	7.29402	-10.3759	6.92583e-22	2.70034e-20	38.9327	7986350	ARRDC4	down	91947
-0.341562	6.39124	-10.3736	7.05123e-22	2.74602e-20	38.915	8029710	VASP	stable	7408
0.289275	7.50394	10.3706	7.21657e-22	2.80713e-20	38.8921	8112622	GFM2	stable	84340
-0.422528	5.53998	-10.3696	7.27418e-22	2.82623e-20	38.8842	8040695	KCNK3	down	3777
-0.202255	7.57058	-10.3665	7.45213e-22	2.892e-20	38.8604	7953699	FOXJ2	stable	55810
-0.810975	9.17605	-10.3591	7.89388e-22	3.05986e-20	38.8035	7995838	MT1X	down	4501
-0.306659	5.38091	-10.3535	8.24692e-22	3.193e-20	38.7603	7949603	BRMS1	stable	25855
-0.563336	7.6395	-10.3528	8.29136e-22	3.20648e-20	38.755	8042830	MTHFD2	down	10797
-0.255029	7.86816	-10.3472	8.66258e-22	3.34615e-20	38.7118	8080810	PTPRG	stable	5793
0.823168	5.1975	10.3437	8.90324e-22	3.43402e-20	38.6847	8091537	IGSF10	up	285313
-0.268382	8.4177	-10.3436	8.9107e-22	3.43402e-20	38.6839	8071119	BCL2L13	stable	23786
-0.5741	8.10437	-10.3377	9.3235e-22	3.58895e-20	38.6392	8063386	CEBPB	down	1051
-0.293999	9.29506	-10.334	9.59882e-22	3.69067e-20	38.6105	8052149	PSME4	stable	23198
-0.34052	6.50835	-10.332	9.75232e-22	3.74187e-20	38.5948	8092552	IGF2BP2	stable	10644
0.674593	5.51488	10.3319	9.75445e-22	3.74187e-20	38.5946	8014316	CCL5	up	6352
-0.42379	6.29748	-10.3261	1.02077e-21	3.91121e-20	38.5497	8109350	SLC36A1	down	206358
0.416571	5.89321	10.3255	1.02568e-21	3.92551e-20	38.545	8028084	APLP1	up	333
-0.250173	6.2624	-10.3253	1.02714e-21	3.92659e-20	38.5436	8032127	R3HDM4	stable	91300
0.619245	6.37378	10.3225	1.04974e-21	4.0084e-20	38.5221	7983867	CGNL1	up	84952
-0.291239	6.90307	-10.3178	1.0892e-21	4.1543e-20	38.4857	8141625	EPHB4	stable	2050
0.292108	8.56421	10.3155	1.10832e-21	4.22238e-20	38.4685	8058614	LANCL1	stable	10314
-0.268401	5.74522	-10.3151	1.11175e-21	4.23061e-20	38.4655	7978553	SPTSSA	stable	171546
-0.183987	7.07038	-10.3132	1.1285e-21	4.28947e-20	38.4507	8074020	SELENOO	stable	83642
0.554963	4.92751	10.2901	1.35008e-21	5.12584e-20	38.2737	8084002	KCNMB2	up	10242
0.316857	4.80605	10.2825	1.43327e-21	5.4293e-20	38.2147	7943240	PIWIL4	stable	143689
-0.252904	7.66268	-10.2817	1.4412e-21	5.45312e-20	38.2092	7945944	RHOG	stable	391
0.86971	4.90025	10.2755	1.51242e-21	5.71611e-20	38.1616	7906919	RGS4	up	5999
0.749608	5.78038	10.2723	1.55033e-21	5.85275e-20	38.1372	7903777	GSTM5	up	2949
0.511301	5.81281	10.2721	1.55266e-21	5.85491e-20	38.1357	8068713	MX1	up	4599
-0.205856	9.20583	-10.2719	1.55585e-21	5.8603e-20	38.1337	7921133	HDGF	stable	3068
0.320091	5.11239	10.267	1.61651e-21	6.07954e-20	38.0959	7979927	ADAM20	stable	8748
0.27043	8.1342	10.2628	1.66942e-21	6.25285e-20	38.0641	8064637	C20orf194	stable	25943
0.244668	6.99448	10.2565	1.75276e-21	6.5575e-20	38.016	7952869	THYN1	stable	29087
0.283693	7.48736	10.2442	1.92793e-21	7.20476e-20	37.922	8135568	MDFIC	stable	29969
-0.231837	7.32801	-10.2424	1.95552e-21	7.29856e-20	37.908	7948696	MTA2	stable	9219
-1.18869	4.82529	-10.2423	1.95742e-21	7.29856e-20	37.907	7978019	MIR208A	down	406990
0.267209	3.50302	10.242	1.96204e-21	7.30762e-20	37.9047	8174351	NUP62CL	stable	54830
0.175236	7.13565	10.2364	2.04923e-21	7.62381e-20	37.8618	8168303	TAF1	stable	6872
0.325363	6.18832	10.2362	2.05223e-21	7.62646e-20	37.8603	7924682	LEFTY2	stable	7044
0.256391	4.97106	10.2343	2.08238e-21	7.72126e-20	37.8459	8041676	DYNC2LI1	stable	51626
-0.320429	5.38403	-10.2287	2.17492e-21	8.04648e-20	37.803	8059111	ABCB6	stable	10058
-0.154059	9.72966	-10.2257	2.22564e-21	8.22499e-20	37.7802	8015908	LSM12	stable	124801
0.544195	8.13306	10.2178	2.36544e-21	8.73192e-20	37.7201	8154178	JAK2	up	3717
0.213172	7.70771	10.2163	2.39475e-21	8.83032e-20	37.7079	7988286	SPG11	stable	80208
-0.308078	5.68836	-10.2155	2.40787e-21	8.8689e-20	37.7025	8073943	ZBED4	stable	9889
-0.27762	8.5253	-10.2091	2.5305e-21	9.28977e-20	37.6535	7967255	CLIP1	stable	6249
-0.738614	4.82451	-10.2079	2.55469e-21	9.36821e-20	37.6441	8086600	CCR1	down	1230
-0.252317	7.16343	-10.2015	2.68348e-21	9.82968e-20	37.5956	7921806	B4GALT3	stable	8703
-0.25284	8.19873	-10.1955	2.81113e-21	1.02634e-19	37.5497	8170906	FAM50A	stable	9130
0.503827	6.48145	10.1945	2.83415e-21	1.03361e-19	37.5417	7938035	TRIM22	up	10346
0.42669	5.45825	10.1942	2.84097e-21	1.03496e-19	37.5393	7989199	ALDH1A2	up	8854
-0.309853	9.88981	-10.1921	2.88702e-21	1.05059e-19	37.5234	7949496	CFL1	stable	1072
-0.209113	6.76815	-10.1904	2.92505e-21	1.06327e-19	37.5105	8159111	WDR5	stable	11091
0.741616	8.01059	10.1853	3.04258e-21	1.10479e-19	37.4716	7988414	GATM	up	2628
0.401206	5.50309	10.1851	3.04656e-21	1.10503e-19	37.4703	8120279	LRRC1	up	55227
0.426016	6.03283	10.1799	3.17298e-21	1.14838e-19	37.4302	7922807	COLGALT2	up	23127
-0.456199	6.89021	-10.1768	3.24946e-21	1.17478e-19	37.4067	8049567	RAMP1	down	10267
-0.305473	9.46788	-10.1748	3.2999e-21	1.19172e-19	37.3915	8109697	CCNG1	stable	900
0.505402	6.19362	10.172	3.37252e-21	1.21663e-19	37.37	7953469	GNB3	up	2784
-0.506665	4.99723	-10.1704	3.41325e-21	1.22999e-19	37.3581	8097252	BBS12	down	166379
-0.580887	6.73382	-10.169	3.45145e-21	1.24241e-19	37.3472	8029465	BCL3	down	602
-0.198698	7.80428	-10.1678	3.48287e-21	1.25237e-19	37.3382	8034589	FARSA	stable	2193
-0.327332	8.39101	-10.162	3.64214e-21	1.30822e-19	37.2941	8075009	GUCD1	stable	83606
-0.181433	7.12151	-10.1608	3.67566e-21	1.31884e-19	37.285	7920354	DENND4B	stable	9909
0.370816	6.65324	10.1587	3.73698e-21	1.3394e-19	37.2687	8038904	ZNF577	stable	84765
-0.608422	6.64144	-10.1577	3.76501e-21	1.348e-19	37.2613	8115814	SH3PXD2B	down	285590
0.371029	6.52735	10.1531	3.90119e-21	1.39525e-19	37.2263	8011823	ZNF594	stable	84622
-0.883843	6.40245	-10.1525	3.92043e-21	1.40063e-19	37.2214	8094870	SHISA3	down	152573
0.315787	5.6793	10.151	3.96447e-21	1.41484e-19	37.2104	8073470	C22orf46	stable	79640
0.693152	6.00502	10.1453	4.14301e-21	1.47631e-19	37.1669	8129573	MOXD1	up	26002
0.699119	6.1598	10.1453	4.14556e-21	1.47631e-19	37.1663	7934384	MSS51	up	118490
0.422803	5.96577	10.1387	4.36045e-21	1.55118e-19	37.1164	7928218	CDH23	up	64072
-0.211212	7.06776	-10.1353	4.47734e-21	1.59105e-19	37.0903	8086754	SCAP	stable	22937
-0.364111	6.43013	-10.1339	4.52485e-21	1.60623e-19	37.0799	7941621	DPP3	stable	10072
-0.335479	5.52608	-10.1319	4.59689e-21	1.63006e-19	37.0643	8018352	SLC25A19	stable	60386
0.239012	9.58954	10.12	5.03495e-21	1.7835e-19	36.9744	8054888	CLASP1	stable	23332
-0.251733	5.63851	-10.1133	5.30323e-21	1.87454e-19	36.9232	7959500	HIP1R	stable	9026
0.296693	6.52453	10.1124	5.33924e-21	1.88527e-19	36.9165	7953130	RHNO1	stable	83695
-0.430166	8.80518	-10.1117	5.36982e-21	1.89405e-19	36.9109	8172043	SRPX	down	8406
0.254524	7.1213	10.1088	5.48893e-21	1.93402e-19	36.8892	8017283	INTS2	stable	57508
0.519057	6.36591	10.1043	5.68504e-21	2.001e-19	36.8546	7917199	TTLL7	up	79739
0.263948	7.28281	10.0994	5.90304e-21	2.07554e-19	36.8175	8156945	RNF20	stable	56254
0.269438	7.72417	10.0988	5.92836e-21	2.08224e-19	36.8132	7961983	TM7SF3	stable	51768
-0.399311	9.98474	-10.0986	5.93854e-21	2.08362e-19	36.8115	7962537	SLC38A2	down	54407
0.286248	4.44126	10.0939	6.15873e-21	2.1586e-19	36.7756	7917370	COL24A1	stable	255631
0.249102	9.28561	10.0872	6.48174e-21	2.26569e-19	36.7252	8023415	TCF4	stable	6925
0.500275	7.36198	10.0872	6.48466e-21	2.26569e-19	36.7247	8096116	GPAT3	up	84803
-0.256774	7.40052	-10.0863	6.52679e-21	2.27802e-19	36.7183	8032871	DPP9	stable	91039
0.327496	4.9984	10.0859	6.55078e-21	2.28399e-19	36.7147	8015769	BRCA1	stable	672
-0.215464	5.99121	-10.0844	6.6242e-21	2.30717e-19	36.7037	8176109	SLC10A3	stable	8273
-0.38437	5.58623	-10.0717	7.3041e-21	2.53867e-19	36.6073	8119492	BYSL	stable	705
-1.14015	7.20085	-10.0675	7.54653e-21	2.6202e-19	36.5751	7954196	MGST1	down	4257
0.17922	7.23152	10.0672	7.56056e-21	2.62233e-19	36.5732	7932938	EPC1	stable	80314
-0.271434	6.68272	-10.0667	7.58966e-21	2.62969e-19	36.5694	7935707	CHUK	stable	1147
0.538243	6.91882	10.0661	7.62606e-21	2.63955e-19	36.5647	8114920	DPYSL3	up	1809
-0.33759	8.45253	-10.0625	7.83823e-21	2.71017e-19	36.5376	8095148	TMEM165	stable	55858
0.390161	6.4039	10.0545	8.33442e-21	2.87875e-19	36.477	8160559	DDX58	stable	23586
0.531411	5.29237	10.0535	8.40199e-21	2.89908e-19	36.4691	8121257	PRDM1	up	639
0.24878	6.97578	10.0475	8.79514e-21	3.03159e-19	36.424	8051963	SRBD1	stable	55133
0.664251	5.68274	10.0461	8.89437e-21	3.06263e-19	36.4129	7969861	ITGBL1	up	9358
-0.21762	8.0226	-10.0425	9.14018e-21	3.14402e-19	36.386	7914887	TRAPPC3	stable	27095
-0.284488	5.82284	-10.0399	9.32318e-21	3.20365e-19	36.3664	8119661	RRP36	stable	88745
-0.285932	5.88199	-10.0394	9.36005e-21	3.213e-19	36.3625	8058498	FZD5	stable	7855
0.244546	5.11046	10.0362	9.59184e-21	3.28918e-19	36.3384	8031499	SSC5D	stable	284297
-0.298133	6.89824	-10.0308	1.00033e-20	3.42675e-19	36.2969	7992795	THOC6	stable	79228
-0.410552	6.73043	-10.0289	1.01512e-20	3.47383e-19	36.2824	7949836	CDK2AP2	down	10263
-0.408962	7.65818	-10.0264	1.03479e-20	3.53752e-19	36.2635	7960518	TNFRSF1A	down	7132
0.241705	8.27078	10.0252	1.04384e-20	3.56479e-19	36.2549	8175755	CETN2	stable	1069
-0.293424	5.56045	-10.0245	1.0495e-20	3.58047e-19	36.2496	7923027	GLRX2	stable	51022
0.311207	6.94045	10.0192	1.0931e-20	3.72537e-19	36.2094	8064245	TCEA2	stable	6919
0.183009	7.04367	10.0167	1.11396e-20	3.7926e-19	36.1908	8099410	BOD1L1	stable	259282
-0.435798	8.45668	-10.009	1.18191e-20	4.01981e-19	36.1323	8142554	AASS	down	10157
-0.747211	8.68341	-10.0054	1.21479e-20	4.12743e-19	36.1052	8066619	PLTP	down	5360
-0.281315	6.8821	-10.0053	1.2161e-20	4.12766e-19	36.1042	8149258	MFHAS1	stable	9258
0.225966	8.22172	10.0049	1.21977e-20	4.13592e-19	36.1012	7933877	JMJD1C	stable	221037
0.253842	6.63338	10.0041	1.22718e-20	4.1568e-19	36.0952	7929562	ZNF518A	stable	9849
0.21619	7.48385	10.0005	1.26128e-20	4.26796e-19	36.0682	8056060	BAZ2B	stable	29994
0.215769	7.84092	9.99518	1.31413e-20	4.43778e-19	36.0277	8121161	UFL1	stable	23376
0.314331	9.03086	9.99036	1.36357e-20	4.59866e-19	35.9912	8145977	PLEKHA2	stable	59339
0.311533	6.49653	9.99027	1.36453e-20	4.59866e-19	35.9905	8027304	ZNF493	stable	284443
-0.324749	5.43923	-9.98996	1.36774e-20	4.59975e-19	35.9882	8110865	IRX4	stable	50805
-0.225356	6.16748	-9.98984	1.369e-20	4.59975e-19	35.9873	8132646	CCM2	stable	83605
-0.211804	6.01307	-9.98773	1.39128e-20	4.66992e-19	35.9714	8007272	COASY	stable	80347
-0.233893	7.76567	-9.9826	1.44707e-20	4.85226e-19	35.9326	8053214	AUP1	stable	550
-0.236088	6.44046	-9.98106	1.46418e-20	4.90471e-19	35.921	7914750	SMIM12	stable	113444
0.584703	5.03021	9.97391	1.54653e-20	5.17535e-19	35.867	8106418	CRHBP	up	1393
-0.456665	6.78559	-9.97263	1.56183e-20	5.22132e-19	35.8573	8069348	PCNT	down	5116
-0.443209	8.3735	-9.97105	1.58078e-20	5.27938e-19	35.8454	8115099	PDGFRB	down	5159
0.343896	6.29577	9.9689	1.60705e-20	5.36171e-19	35.8291	8038967	ZNF83	stable	55769
0.484406	7.63504	9.96561	1.64793e-20	5.49259e-19	35.8043	8156783	COL15A1	up	1306
-0.156312	5.95845	-9.9644	1.66326e-20	5.53815e-19	35.7952	7994985	SETD1A	stable	9739
-0.20171	9.26944	-9.96286	1.68294e-20	5.5981e-19	35.7836	7999532	GSPT1	stable	2935
-0.416645	7.8968	-9.95875	1.73673e-20	5.77124e-19	35.7525	7906863	UAP1	down	6675
-0.218005	8.66344	-9.95859	1.73878e-20	5.77231e-19	35.7514	7909236	MAPKAPK2	stable	9261
-0.247293	7.01498	-9.95802	1.74648e-20	5.79208e-19	35.747	7897685	UBIAD1	stable	29914
-0.184526	9.55433	-9.95027	1.85302e-20	6.13932e-19	35.6886	8085374	RAF1	stable	5894
-0.387787	3.42645	-9.94849	1.87836e-20	6.21709e-19	35.6752	7980861	CATSPERB	stable	79820
-0.26986	7.98857	-9.94074	1.99298e-20	6.58335e-19	35.6168	7897803	PLOD1	stable	5351
1.01714	4.2299	9.93984	2.00666e-20	6.62199e-19	35.61	8112971	HAPLN1	up	1404
-0.310234	6.9679	-9.93618	2.06362e-20	6.80322e-19	35.5824	7940989	ESRRA	stable	2101
0.40079	7.91862	9.93129	2.14215e-20	7.05511e-19	35.5455	8084541	VPS8	up	23355
0.277276	7.90437	9.93095	2.1476e-20	7.06607e-19	35.543	7945262	JAM3	stable	83700
0.369802	5.03192	9.93031	2.15825e-20	7.09411e-19	35.5381	8087691	CACNA2D2	stable	9254
0.361303	4.36758	9.91974	2.33948e-20	7.67463e-19	35.4586	8047952	UNC80	stable	285175
-0.64075	4.747	-9.91396	2.44496e-20	7.99183e-19	35.4151	7903565	GPSM2	down	29899
0.113049	9.67809	9.91392	2.44577e-20	7.99183e-19	35.4147	7939242	CAPRIN1	stable	4076
0.272443	3.75088	9.91238	2.47472e-20	8.0785e-19	35.4031	8101616	C4orf36	stable	132989
-0.283202	8.00047	-9.90505	2.61686e-20	8.52579e-19	35.348	8094599	KLF3	stable	51274
0.245143	4.79554	9.90312	2.65577e-20	8.6441e-19	35.3335	8022872	ZSCAN30	stable	100101467
0.302218	6.18666	9.90271	2.66399e-20	8.66239e-19	35.3304	7984686	BBS4	stable	585
0.387558	8.23108	9.89518	2.8214e-20	9.15634e-19	35.2738	8142431	SMIM30	stable	401397
0.355732	7.25694	9.89474	2.83096e-20	9.17843e-19	35.2704	7998103	GAS8	stable	2622
0.248943	7.63607	9.89368	2.85391e-20	9.24384e-19	35.2625	7968835	AKAP11	stable	11215
0.26727	8.7495	9.88987	2.9378e-20	9.50631e-19	35.2339	8050128	KIDINS220	stable	57498
0.257194	6.02905	9.88797	2.98083e-20	9.63617e-19	35.2196	8031857	ZNF135	stable	7694
-0.23222	7.2133	-9.88233	3.11147e-20	1.00293e-18	35.1772	8131479	MIOS	stable	54468
-0.233347	8.78298	-9.88104	3.1424e-20	1.01192e-18	35.1675	8012226	FXR2	stable	9513
0.297947	6.22368	9.88062	3.15245e-20	1.01417e-18	35.1643	7913682	HMGCL	stable	3155
-0.325311	6.37611	-9.87947	3.18012e-20	1.02209e-18	35.1557	7984743	CD276	stable	80381
-0.294635	8.73096	-9.87621	3.26003e-20	1.04676e-18	35.1312	7900413	ZMPSTE24	stable	10269
-0.984918	6.28411	-9.87571	3.27234e-20	1.04932e-18	35.1275	8048717	SGPP2	down	130367
0.191115	8.37312	9.87564	3.27429e-20	1.04932e-18	35.1269	7995655	FTO	stable	79068
-0.424704	7.60891	-9.87228	3.35898e-20	1.07439e-18	35.1017	7941761	RHOD	down	29984
0.224308	7.40698	9.86754	3.48239e-20	1.11173e-18	35.0661	7931293	DOCK1	stable	1793
-0.227931	7.00606	-9.86511	3.54732e-20	1.13137e-18	35.0479	8098924	LETM1	stable	3954
0.289083	7.27889	9.86341	3.59346e-20	1.14459e-18	35.0351	7990211	HEXA	stable	3073
-0.267318	10.0499	-9.86333	3.59565e-20	1.14459e-18	35.0345	7998655	RPS2	stable	6187
0.316865	7.66597	9.85893	3.71819e-20	1.18247e-18	35.0015	7982723	IVD	stable	3712
-0.204754	7.10471	-9.85834	3.73485e-20	1.18664e-18	34.9971	8169811	OCRL	stable	4952
0.355893	5.4435	9.85271	3.89815e-20	1.23683e-18	34.9549	8072382	OSBP2	stable	23762
0.356393	5.06411	9.85264	3.90027e-20	1.23683e-18	34.9543	8037430	ZNF404	stable	342908
0.636176	8.20029	9.85018	3.97414e-20	1.25786e-18	34.9358	8113504	NREP	up	9315
0.319922	6.58318	9.84959	3.99197e-20	1.26231e-18	34.9314	8091737	IFT80	stable	57560
-0.269695	6.09751	-9.84752	4.05518e-20	1.28107e-18	34.9159	8024584	NCLN	stable	56926
0.264234	3.91709	9.8462	4.096e-20	1.29249e-18	34.906	8089659	CCDC191	stable	57577
0.252523	6.93055	9.8461	4.09909e-20	1.29249e-18	34.9053	7988124	PPIP5K1	stable	9677
-0.310189	7.2166	-9.84527	4.12526e-20	1.29951e-18	34.899	8026982	MPV17L2	stable	84769
0.377545	6.11337	9.84481	4.13961e-20	1.3028e-18	34.8956	8047577	CARF	stable	79800
0.66372	8.05352	9.84255	4.21128e-20	1.32411e-18	34.8786	7901535	PODN	up	127435
0.733353	6.43094	9.83853	4.342e-20	1.36392e-18	34.8485	8095535	ENAM	up	10117
-0.381559	8.9321	-9.83448	4.47753e-20	1.40517e-18	34.8181	8043909	NPAS2	stable	4862
0.313007	3.7123	9.83063	4.61055e-20	1.44555e-18	34.7893	8167957	ZC3H12B	stable	340554
-0.268725	7.71841	-9.82512	4.80744e-20	1.50445e-18	34.748	8132580	YKT6	stable	10652
-0.210088	6.121	-9.82064	4.97401e-20	1.55512e-18	34.7144	8142795	IMPDH1	stable	3614
-0.230375	6.21295	-9.81731	5.10121e-20	1.59338e-18	34.6895	7896952	ATAD3A	stable	55210
0.768995	5.2847	9.81574	5.16235e-20	1.61097e-18	34.6777	8174201	BEX1	up	55859
0.181309	6.09631	9.81289	5.27506e-20	1.64306e-18	34.6564	8180206	GUSBP4	stable	375513
-0.191804	9.54777	-9.80788	5.47979e-20	1.70524e-18	34.6189	8057517	NCKAP1	stable	10787
-0.171164	5.92122	-9.80743	5.49847e-20	1.70945e-18	34.6155	8109254	TCOF1	stable	6949
0.230695	9.07038	9.80544	5.58192e-20	1.73378e-18	34.6007	7952103	DDX6	stable	1656
0.321331	7.29207	9.80388	5.64841e-20	1.75117e-18	34.589	7980983	MOAP1	stable	64112
0.271011	6.3488	9.80298	5.6873e-20	1.76158e-18	34.5822	8103399	PDGFC	stable	56034
-0.254585	7.56819	-9.80222	5.71987e-20	1.77002e-18	34.5766	8085660	DPH3	stable	285381
0.481836	6.3183	9.80082	5.78116e-20	1.78567e-18	34.5661	8151101	MYBL1	up	4603
0.537773	4.33042	9.79504	6.04023e-20	1.86224e-18	34.5228	8086344	CX3CR1	up	1524
-0.277339	6.47456	-9.78663	6.43753e-20	1.98106e-18	34.46	8028851	SHKBP1	stable	92799
0.280432	7.62679	9.78551	6.49248e-20	1.99612e-18	34.4516	8140915	PEX1	stable	5189
-0.249712	8.81234	-9.78389	6.57256e-20	2.01888e-18	34.4395	7999387	EMP2	stable	2013
-0.444464	7.1109	-9.78314	6.61018e-20	2.02856e-18	34.4339	8057599	TFPI	down	7035
0.407648	7.56942	9.78079	6.72907e-20	2.06235e-18	34.4163	8176163	GAB3	up	139716
0.477743	5.98255	9.78072	6.73265e-20	2.06235e-18	34.4158	7902553	IFI44	up	10561
-0.307724	5.57494	-9.77837	6.85362e-20	2.09747e-18	34.3982	8017143	PTRH2	stable	51651
0.435632	6.89495	9.7779	6.87782e-20	2.10295e-18	34.3947	7909801	LYPLAL1	up	127018
0.193584	6.12235	9.77665	6.94344e-20	2.12106e-18	34.3854	8134680	ZKSCAN1	stable	7586
-0.460611	4.26547	-9.77469	7.04698e-20	2.15072e-18	34.3708	8040249	ATP6V1C2	down	245973
-0.25135	7.37091	-9.77409	7.07921e-20	2.15857e-18	34.3663	7949746	POLD4	stable	57804
0.200651	7.14302	9.77227	7.17735e-20	2.1865e-18	34.3527	7993680	VPS35L	stable	57020
-0.269451	7.24191	-9.77056	7.27087e-20	2.21258e-18	34.3399	8165077	NACC2	stable	138151
-0.809678	9.95654	-9.77046	7.27627e-20	2.21258e-18	34.3392	8167185	TIMP1	down	7076
0.418293	7.13354	9.76535	7.56354e-20	2.29784e-18	34.301	7915775	IPP	up	3652
-0.363647	5.57763	-9.75905	7.93299e-20	2.40569e-18	34.2539	8051030	SLC5A6	stable	8884
-0.208813	5.75028	-9.75321	8.29158e-20	2.50986e-18	34.2103	8072962	MICALL1	stable	85377
0.299944	9.20952	9.75219	8.35555e-20	2.52693e-18	34.2027	8041383	LTBP1	stable	4052
0.261582	7.13827	9.74297	8.95921e-20	2.70458e-18	34.1339	7979044	NIN	stable	51199
0.275648	7.55728	9.73881	9.24542e-20	2.78845e-18	34.1029	7968711	COG6	stable	57511
0.251672	9.6332	9.72898	9.95793e-20	3.00063e-18	34.0297	7985695	AKAP13	stable	11214
-0.216644	6.34609	-9.71699	1.09022e-19	3.27627e-18	33.9403	8053449	TMEM150A	stable	129303
-0.404265	4.52588	-9.71451	1.11076e-19	3.33497e-18	33.9219	8030563	SIGLEC16	down	400709
-0.204795	6.6382	-9.711	1.14064e-19	3.4216e-18	33.8957	7949465	RELA	stable	5970
-0.170751	9.83677	-9.71035	1.14625e-19	3.43534e-18	33.8909	7960689	MLF2	stable	8079
0.341891	7.08559	9.7079	1.16763e-19	3.49629e-18	33.8727	8120067	SLC25A27	stable	9481
0.292712	8.89803	9.70667	1.1785e-19	3.52566e-18	33.8635	7916862	WLS	stable	79971
-0.272573	6.78597	-9.70571	1.1871e-19	3.5482e-18	33.8564	8027701	GRAMD1A	stable	57655
0.325263	3.9862	9.70559	1.18819e-19	3.54827e-18	33.8555	8036304	ZFP14	stable	57677
0.26248	7.05456	9.70068	1.23299e-19	3.67874e-18	33.819	7960654	ING4	stable	51147
-0.29829	9.39989	-9.6994	1.24497e-19	3.71118e-18	33.8094	8152628	DERL1	stable	79139
-0.342426	7.38577	-9.69893	1.24934e-19	3.72087e-18	33.806	7920291	S100A16	stable	140576
0.364434	3.34621	9.69849	1.25355e-19	3.73006e-18	33.8026	8113369	SLCO4C1	stable	353189
-0.250884	6.62041	-9.69731	1.26474e-19	3.76e-18	33.7939	8160981	FAM214B	stable	80256
-0.256343	6.01676	-9.69512	1.28577e-19	3.8157e-18	33.7776	8003840	EMC6	stable	83460
-0.244277	7.79146	-9.69354	1.3012e-19	3.85805e-18	33.7659	7963064	MCRS1	stable	10445
0.265163	7.36913	9.69231	1.31338e-19	3.89072e-18	33.7567	8096314	PKD2	stable	5311
0.568966	5.46092	9.69166	1.31983e-19	3.90636e-18	33.7518	8067942	MIR99A	up	407055
-0.333708	4.93316	-9.69023	1.33406e-19	3.94497e-18	33.7413	8083941	ECT2	stable	1894
0.320395	5.20923	9.68951	1.34141e-19	3.96317e-18	33.7358	7939665	MDK	stable	4192
-0.400318	8.63154	-9.68559	1.38156e-19	4.07817e-18	33.7067	8079153	ABHD5	down	51099
0.344358	7.00984	9.67729	1.47073e-19	4.33371e-18	33.6451	8101086	NAAA	stable	27163
-0.466817	8.94491	-9.67497	1.4967e-19	4.40633e-18	33.6278	8176193	F8	down	2157
0.838134	8.11854	9.67481	1.4985e-19	4.40773e-18	33.6266	7980152	LTBP2	up	4053
0.344438	5.10457	9.67459	1.50098e-19	4.41113e-18	33.625	7984932	SCAMP5	stable	192683
0.300188	9.15801	9.67393	1.50846e-19	4.42919e-18	33.6201	8142886	UBE2H	stable	7328
0.407866	3.89776	9.67112	1.54076e-19	4.52005e-18	33.5992	7953949	KLRD1	up	3824
0.278692	6.53057	9.66313	1.63634e-19	4.79624e-18	33.5398	7965060	BBS10	stable	79738
-0.298469	5.69692	-9.66149	1.65662e-19	4.8514e-18	33.5277	8164833	GBGT1	stable	26301
0.45906	6.04409	9.65921	1.68522e-19	4.93083e-18	33.5108	8092523	EHHADH	up	1962
0.364842	6.67731	9.65865	1.69237e-19	4.94739e-18	33.5066	8023497	ATP8B1	stable	5205
0.438926	7.41037	9.65726	1.71016e-19	4.99501e-18	33.4963	8100026	ATP8A1	up	10396
0.226656	5.7113	9.65641	1.72115e-19	5.022e-18	33.49	8061919	CBFA2T2	stable	9139
-0.188379	6.36212	-9.6562	1.72392e-19	5.022e-18	33.4884	8000890	SEPHS2	stable	22928
-0.214103	6.76567	-9.65177	1.78231e-19	5.18754e-18	33.4556	8163525	POLE3	stable	54107
0.339745	5.80271	9.65056	1.79866e-19	5.23057e-18	33.4465	8069574	C21orf91	stable	54149
-0.898809	6.1393	-9.6437	1.89386e-19	5.50261e-18	33.3957	8078155	GALNT15	down	117248
-0.332136	7.01805	-9.64274	1.90762e-19	5.53777e-18	33.3885	8121144	MANEA	stable	79694
-0.161187	7.70358	-9.64097	1.93312e-19	5.6069e-18	33.3754	8048304	CTDSP1	stable	58190
-0.214929	5.85009	-9.63975	1.95095e-19	5.65369e-18	33.3664	8025368	SNAPC2	stable	6618
-0.307542	7.61258	-9.63556	2.01337e-19	5.82948e-18	33.3353	7999419	DEXI	stable	28955
0.265167	6.43559	9.6341	2.03569e-19	5.88899e-18	33.3245	8054131	COA5	stable	493753
0.540864	6.07706	9.63358	2.04364e-19	5.90686e-18	33.3206	7908204	HMCN1	up	83872
-0.458422	7.36911	-9.63259	2.05894e-19	5.94593e-18	33.3133	8167763	TSPYL2	down	64061
-0.396193	7.05093	-9.63221	2.06472e-19	5.95745e-18	33.3105	8022531	NPC1	down	4864
-0.220065	6.14019	-9.62957	2.10617e-19	6.07179e-18	33.2909	7898263	FBLIM1	stable	54751
-0.270455	9.72824	-9.6284	2.12471e-19	6.11993e-18	33.2823	8015545	RAB5C	stable	5878
-0.174163	5.8582	-9.62591	2.16486e-19	6.23021e-18	33.2638	7905831	FLAD1	stable	80308
0.589867	6.30063	9.61572	2.33715e-19	6.72021e-18	33.1883	8152506	SAMD12	up	401474
0.224628	5.35795	9.60573	2.51905e-19	7.23699e-18	33.1144	8116607	LINC01011	stable	401232
0.317874	7.92007	9.60411	2.54981e-19	7.31906e-18	33.1024	7939595	CRY2	stable	1408
-0.474427	6.66272	-9.60225	2.58574e-19	7.41579e-18	33.0886	8008237	ITGA3	down	3675
0.296975	8.17647	9.60213	2.58807e-19	7.4161e-18	33.0877	7980616	PTPN21	stable	11099
0.231233	7.1321	9.59845	2.66057e-19	7.61728e-18	33.0605	8045604	MBD5	stable	55777
0.252713	6.38875	9.59746	2.68027e-19	7.6671e-18	33.0532	8160238	PSIP1	stable	11168
0.993351	6.59861	9.59589	2.71219e-19	7.75175e-18	33.0415	8022728	DSC1	up	1823
-0.195657	7.73747	-9.59294	2.77271e-19	7.91791e-18	33.0198	8134890	GNB2	stable	2783
-0.206083	8.15436	-9.58829	2.87125e-19	8.1923e-18	32.9853	7993223	CLEC16A	stable	23274
-0.343806	9.09121	-9.5845	2.95401e-19	8.4212e-18	32.9573	8126798	ADGRF5	stable	221395
0.264941	6.73883	9.58359	2.97407e-19	8.47112e-18	32.9506	8001818	TK2	stable	7084
-0.980524	3.75598	-9.58279	2.99194e-19	8.51477e-18	32.9447	8146957	PI15	down	51050
-0.268753	7.41007	-9.58262	2.99575e-19	8.51833e-18	32.9435	8005557	EPN2	stable	22905
-0.217093	8.72506	-9.57986	3.05853e-19	8.68941e-18	32.923	7919856	CERS2	stable	29956
0.45981	5.50888	9.57495	3.17307e-19	9.00714e-18	32.8868	8117435	BTN3A2	up	11118
-0.281023	8.55872	-9.5722	3.23909e-19	9.1867e-18	32.8665	8090490	RPN1	stable	6184
0.232537	10.0051	9.56898	3.31829e-19	9.40334e-18	32.8426	8127234	DST	stable	667
0.275528	5.79086	9.56639	3.38313e-19	9.57891e-18	32.8236	8027297	ZNF738	stable	148203
-0.833412	6.86683	-9.5661	3.39062e-19	9.59197e-18	32.8214	7968351	MEDAG	down	84935
0.241912	7.40942	9.56229	3.48873e-19	9.85942e-18	32.7932	7933947	HERC4	stable	26091
0.385314	4.52082	9.56177	3.50229e-19	9.88269e-18	32.7894	8151686	MMP16	stable	4325
-0.288022	8.3765	-9.56064	3.53193e-19	9.95789e-18	32.7811	7927786	REEP3	stable	221035
0.789807	6.18686	9.55989	3.552e-19	1.0006e-17	32.7755	8099476	PROM1	up	8842
0.336264	6.51914	9.55265	3.74973e-19	1.05541e-17	32.7221	7935011	CPEB3	stable	22849
0.370312	5.08976	9.55136	3.78619e-19	1.06477e-17	32.7126	8086125	TRANK1	stable	9881
0.315549	4.63294	9.54976	3.83166e-19	1.07665e-17	32.7008	8107594	SNCAIP	stable	9627
-0.231474	7.11629	-9.53748	4.20042e-19	1.17927e-17	32.6102	7955810	PRR13	stable	54458
0.311551	6.75125	9.53343	4.32947e-19	1.21448e-17	32.5804	8127094	GSTA4	stable	2941
0.521049	5.0266	9.53271	4.35288e-19	1.21899e-17	32.575	8173600	NAP1L2	up	4674
-0.181688	8.71701	-9.53115	4.40381e-19	1.23222e-17	32.5636	8172358	UXT	stable	8409
0.330926	8.65797	9.5293	4.46504e-19	1.2483e-17	32.5499	8173217	ARHGEF9	stable	23229
-0.335353	6.17167	-9.5279	4.51212e-19	1.25923e-17	32.5396	8028563	MRPS12	stable	6183
0.239391	4.94423	9.5278	4.51549e-19	1.25923e-17	32.5389	8055377	ZRANB3	stable	84083
-0.337011	7.76951	-9.52653	4.55845e-19	1.27015e-17	32.5295	8153201	AGO2	stable	27161
0.327198	6.6422	9.52605	4.57479e-19	1.27364e-17	32.526	7954717	BICD1	stable	636
0.449542	3.53362	9.52032	4.77491e-19	1.32824e-17	32.4838	8168531	GPR174	up	84636
-0.329711	7.00359	-9.51805	4.85674e-19	1.34987e-17	32.467	7944401	HMBS	stable	3145
0.380543	5.65079	9.51187	5.0862e-19	1.41247e-17	32.4215	8098441	TENM3	stable	55714
0.422749	6.75508	9.51013	5.1524e-19	1.42966e-17	32.4088	8117207	ALDH5A1	up	7915
0.894958	6.87307	9.50941	5.18043e-19	1.43624e-17	32.4034	7923578	FMOD	up	2331
-0.201458	6.09353	-9.50892	5.19922e-19	1.43985e-17	32.3999	8110362	GRK6	stable	2870
-0.214279	6.18871	-9.50885	5.20209e-19	1.43985e-17	32.3993	8076344	POLR3H	stable	171568
0.53825	9.40325	9.50483	5.3604e-19	1.48243e-17	32.3698	8118594	HLA-DPB1	up	3115
0.3202	6.173	9.50145	5.49732e-19	1.51904e-17	32.3449	7997128	IL34	stable	146433
-0.201609	8.17118	-9.49613	5.72006e-19	1.57928e-17	32.3057	7954173	STRAP	stable	11171
-0.208299	9.50134	-9.49471	5.78066e-19	1.59469e-17	32.2953	8027876	TMEM147	stable	10430
-0.51224	9.13026	-9.49357	5.8303e-19	1.60705e-17	32.2869	8166469	SAT1	down	6303
-0.283115	6.93404	-9.49298	5.85583e-19	1.61275e-17	32.2826	8123976	GFOD1	stable	54438
0.298793	5.91367	9.49013	5.98185e-19	1.64609e-17	32.2616	8106722	ATP6AP1L	stable	92270
-0.20908	7.43901	-9.48706	6.12008e-19	1.68274e-17	32.2391	8012116	CTDNEP1	stable	23399
-0.362523	5.36216	-9.48479	6.22458e-19	1.71007e-17	32.2224	8064388	SLC52A3	stable	113278
0.397178	8.70853	9.48326	6.29613e-19	1.72687e-17	32.2111	7904293	PTGFRN	up	5738
-0.774363	7.34852	-9.48177	6.3663e-19	1.74468e-17	32.2002	7950906	CTSC	down	1075
0.335498	4.70476	9.47456	6.71758e-19	1.83944e-17	32.1472	8014248	SLFN13	stable	146857
0.331954	6.39187	9.47105	6.8959e-19	1.88516e-17	32.1214	7963590	CSAD	stable	51380
-0.232512	6.79175	-9.46985	6.9579e-19	1.90055e-17	32.1126	8041763	PRKCE	stable	5581
0.266101	10.2082	9.46359	7.28965e-19	1.98954e-17	32.0667	7958414	ISCU	stable	23479
0.264652	8.8312	9.46327	7.3069e-19	1.99261e-17	32.0643	8086077	CLASP2	stable	23122
-0.196875	6.45377	-9.46263	7.34218e-19	1.99921e-17	32.0596	7912481	MAD2L2	stable	10459
-0.422263	5.16684	-9.46261	7.3431e-19	1.99921e-17	32.0595	7940582	BEST1	down	7439
0.319243	7.06894	9.46118	7.42189e-19	2.01901e-17	32.0489	8036763	DYRK1B	stable	9149
-0.80882	8.07105	-9.45135	7.98506e-19	2.16867e-17	31.9768	8114612	CD14	down	929
-0.293337	6.72756	-9.45096	8.00813e-19	2.17316e-17	31.974	7939642	CREB3L1	stable	90993
0.320546	6.21919	9.44626	8.2931e-19	2.24866e-17	31.9395	7901748	FGGY	stable	55277
-0.249222	6.95399	-9.44276	8.51222e-19	2.30432e-17	31.9138	7899253	ZDHHC18	stable	84243
0.367787	6.14754	9.4419	8.56635e-19	2.31709e-17	31.9076	8117476	BTN3A3	stable	10384
0.238605	5.10496	9.44051	8.65575e-19	2.33937e-17	31.8973	8067270	APCDD1L	stable	164284
-0.208512	9.16936	-9.43837	8.79431e-19	2.37489e-17	31.8817	7996677	NUTF2	stable	10204
0.261707	7.3178	9.43816	8.80829e-19	2.37674e-17	31.8801	8020668	IMPACT	stable	55364
-0.377908	7.02697	-9.42953	9.39196e-19	2.53013e-17	31.8169	8131600	TSPAN13	stable	27075
-0.221819	5.88627	-9.42913	9.41988e-19	2.5356e-17	31.8139	8025199	PNPLA6	stable	10908
-0.273981	6.90964	-9.4288	9.44314e-19	2.53981e-17	31.8115	7915578	TMEM53	stable	79639
-0.183873	6.30342	-9.42863	9.45495e-19	2.54093e-17	31.8103	8019194	FAAP100	stable	80233
0.382203	7.92973	9.4194	1.01262e-18	2.71693e-17	31.7427	7911529	MXRA8	stable	54587
0.485145	7.58254	9.41906	1.01514e-18	2.72152e-17	31.7402	8088745	FRMD4B	up	23150
-0.317717	5.1482	-9.41835	1.02052e-18	2.73373e-17	31.735	8036908	SERTAD3	stable	29946
0.262814	6.73079	9.41823	1.0214e-18	2.73389e-17	31.7341	8133167	KCTD7	stable	154881
0.288177	5.14781	9.41319	1.06036e-18	2.83363e-17	31.6972	8079229	ZNF501	stable	115560
0.263316	6.73499	9.41187	1.07085e-18	2.85707e-17	31.6875	8100603	CENPC	stable	1060
-0.28731	7.79825	-9.40538	1.12366e-18	2.99557e-17	31.6401	8128111	UBE2J1	stable	51465
-0.227081	9.47027	-9.40334	1.14077e-18	3.03873e-17	31.6252	8146000	ADAM9	stable	8754
-0.456436	7.81079	-9.40229	1.14969e-18	3.06004e-17	31.6175	8030007	EMP3	down	2014
-0.245012	8.63805	-9.39977	1.17146e-18	3.1155e-17	31.599	8119712	SRF	stable	6722
-0.311272	7.26496	-9.39924	1.17603e-18	3.12515e-17	31.5952	8130993	FAM20C	stable	56975
-1.49734	6.96835	-9.39691	1.19652e-18	3.17455e-17	31.5782	8135069	SERPINE1	down	5054
-0.277825	7.90543	-9.39602	1.20446e-18	3.19306e-17	31.5716	7915504	ELOVL1	stable	64834
0.34943	8.01277	9.39582	1.20626e-18	3.19528e-17	31.5702	8152222	AZIN1	stable	51582
-0.52558	7.932	-9.38463	1.3106e-18	3.46892e-17	31.4884	8113220	ELL2	down	22936
0.327364	7.1347	9.38443	1.31258e-18	3.4714e-17	31.4869	7899424	ATP5IF1	stable	93974
0.170313	6.86211	9.38303	1.32625e-18	3.50476e-17	31.4767	8001350	BRD7	stable	29117
0.242409	4.20772	9.38114	1.34493e-18	3.55131e-17	31.4629	8076612	EFCAB6	stable	64800
0.26325	5.73588	9.37512	1.40635e-18	3.71055e-17	31.4189	7941890	CARNS1	stable	57571
0.414263	9.89875	9.37134	1.4462e-18	3.81269e-17	31.3913	7956658	SLC16A7	up	9194
0.328237	6.72167	9.37074	1.45269e-18	3.82676e-17	31.3869	8101728	FAM13A	stable	10144
-0.258601	7.16161	-9.36468	1.51932e-18	3.99911e-17	31.3427	8142878	CDC26	stable	246184
-0.406608	6.93861	-9.36291	1.53937e-18	4.0487e-17	31.3298	7927936	DDX21	down	9188
0.415982	4.90661	9.35957	1.57795e-18	4.14689e-17	31.3054	8083779	SERPINI1	up	5274
0.196115	6.57828	9.3563	1.61655e-18	4.24496e-17	31.2816	7932285	MINDY3	stable	80013
-0.233704	7.38014	-9.3547	1.63583e-18	4.29223e-17	31.2699	7982326	KLF13	stable	51621
0.330707	6.20854	9.35312	1.65505e-18	4.33924e-17	31.2584	8120239	TMEM14A	stable	28978
0.207713	8.85626	9.35217	1.66669e-18	4.36632e-17	31.2515	8089701	ZBTB20	stable	26137
-0.288206	8.87466	-9.35102	1.681e-18	4.40033e-17	31.2431	7963911	CD63	stable	967
-0.301689	7.10546	-9.34911	1.70491e-18	4.45942e-17	31.2291	7986665	NIPA2	stable	81614
-0.17161	8.04438	-9.34707	1.73079e-18	4.52002e-17	31.2143	8057034	PRKRA	stable	8575
0.348371	5.8614	9.33965	1.82841e-18	4.76746e-17	31.1602	8105191	PARP8	stable	79668
-0.306556	7.96262	-9.33913	1.83547e-18	4.78214e-17	31.1564	8017547	ICAM2	stable	3384
0.349602	6.07052	9.33822	1.84788e-18	4.81071e-17	31.1498	8095870	CCNG2	stable	901
0.387511	7.9693	9.33686	1.8666e-18	4.85565e-17	31.1398	7931168	ACADSB	stable	36
0.201267	6.84123	9.33584	1.88063e-18	4.88724e-17	31.1324	8130087	PPIL4	stable	85313
-0.327448	5.59463	-9.33577	1.88169e-18	4.88724e-17	31.1319	7992147	CACNA1H	stable	8912
-0.180282	6.60025	-9.33222	1.9317e-18	5.01325e-17	31.106	8038477	AKT1S1	stable	84335
0.397468	6.58088	9.33113	1.94725e-18	5.04965e-17	31.0981	8098611	TLR3	up	7098
-0.340056	5.99811	-9.33099	1.94939e-18	5.05126e-17	31.0971	8020183	IMPA2	stable	3613
-0.188682	7.75729	-9.32865	1.9833e-18	5.13116e-17	31.0801	8175947	HCFC1	stable	3054
0.186215	7.41107	9.32662	2.01322e-18	5.20453e-17	31.0653	8090630	TMCC1	stable	23023
0.317756	6.83712	9.32488	2.03931e-18	5.26787e-17	31.0526	8121563	MARCKS	stable	4082
-0.261491	7.52133	-9.32436	2.04714e-18	5.28399e-17	31.0488	8131111	EIF3B	stable	8662
0.174874	7.06391	9.32395	2.05334e-18	5.2959e-17	31.0458	7955376	DIP2B	stable	57609
-0.281831	7.33929	-9.32016	2.11174e-18	5.43811e-17	31.0182	8022803	GAREM1	stable	64762
-0.225169	7.65264	-9.31897	2.13029e-18	5.47919e-17	31.0096	8040753	TMEM214	stable	54867
-0.346833	10.6238	-9.31893	2.13099e-18	5.47919e-17	31.0093	7938777	LDHA	stable	3939
-0.188712	6.91017	-9.31867	2.13505e-18	5.4854e-17	31.0074	8035905	ANKRD27	stable	84079
-0.230752	7.22882	-9.31778	2.14904e-18	5.51709e-17	31.0009	8148467	CHRAC1	stable	54108
-0.253279	9.25352	-9.31748	2.1539e-18	5.52255e-17	30.9987	8066939	B4GALT5	stable	9334
-0.332367	7.54633	-9.31744	2.15449e-18	5.52255e-17	30.9985	7967685	STX2	stable	2054
-0.182526	7.07647	-9.31548	2.18585e-18	5.59863e-17	30.9842	8102817	ELF2	stable	1998
0.20733	9.21766	9.31159	2.24966e-18	5.75764e-17	30.9559	8160036	DMAC1	stable	90871
0.186559	7.67741	9.30954	2.2839e-18	5.84079e-17	30.941	8144528	TNKS	stable	8658
-0.356155	5.0336	-9.30489	2.3636e-18	6.03534e-17	30.9072	8171418	PIGA	stable	5277
0.202048	7.47143	9.30466	2.36763e-18	6.04099e-17	30.9055	8124040	ATXN1	stable	6310
0.178011	7.3708	9.30384	2.38203e-18	6.07309e-17	30.8995	8168215	MED12	stable	9968
0.219883	5.59136	9.29907	2.46738e-18	6.28588e-17	30.8648	8133062	ZNF273	stable	10793
-0.203978	6.30813	-9.29846	2.47837e-18	6.30904e-17	30.8604	7949264	EHD1	stable	10938
-0.244037	5.92595	-9.29641	2.51616e-18	6.40036e-17	30.8455	8120061	ENPP4	stable	22875
0.492908	6.028	9.29213	2.59682e-18	6.59544e-17	30.8144	7958884	OAS1	up	4938
0.156208	8.63531	9.29024	2.63324e-18	6.68285e-17	30.8007	7934301	ECD	stable	11319
-0.203107	8.53247	-9.28954	2.64691e-18	6.71243e-17	30.7956	7949765	PPP1CA	stable	5499
0.200356	8.26147	9.28905	2.65653e-18	6.7317e-17	30.792	8097148	KIAA1109	stable	84162
0.375484	4.99105	9.28741	2.68877e-18	6.80822e-17	30.7801	7943376	CEP126	stable	57562
0.254958	7.51887	9.2857	2.72282e-18	6.8892e-17	30.7677	8051501	EIF2AK2	stable	5610
-0.198101	5.55475	-9.28429	2.75142e-18	6.951e-17	30.7574	8027049	KLHL26	stable	55295
-0.864139	7.85884	-9.27989	2.84208e-18	7.17458e-17	30.7255	7995806	MT1A	down	4489
-0.210525	6.09055	-9.27608	2.92294e-18	7.37123e-17	30.6978	8097388	LARP1B	stable	55132
-0.507347	7.10036	-9.27601	2.9244e-18	7.37123e-17	30.6973	8107920	SLC22A5	down	6584
-0.263242	7.04777	-9.27133	3.02698e-18	7.62401e-17	30.6634	8035007	AKAP8	stable	10270
0.206018	7.49653	9.26662	3.13382e-18	7.88712e-17	30.6292	7913156	AKR7A2	stable	8574
-0.36569	8.68298	-9.26559	3.15765e-18	7.94111e-17	30.6217	7922689	GLUL	stable	2752
0.261613	6.68344	9.26069	3.27358e-18	8.22645e-17	30.5862	8122409	PEX3	stable	8504
0.324365	8.19013	9.25523	3.40764e-18	8.53756e-17	30.5466	8141035	SGCE	stable	8910
-0.246884	8.752	-9.25442	3.42812e-18	8.58241e-17	30.5407	8079753	DAG1	stable	1605
0.234168	7.77582	9.25373	3.44564e-18	8.6198e-17	30.5357	8012212	ZBTB4	stable	57659
0.257028	8.78794	9.25343	3.45322e-18	8.63227e-17	30.5335	8157105	ZNF462	stable	58499
-0.214942	7.13793	-9.24867	3.57629e-18	8.93323e-17	30.499	7983157	TMEM62	stable	80021
-0.315283	4.28165	-9.24748	3.60759e-18	9.00464e-17	30.4904	8158902	CFAP77	stable	389799
-0.358928	6.25712	-9.24629	3.63938e-18	9.07719e-17	30.4818	8024391	DOT1L	stable	84444
-0.454709	8.43913	-9.24601	3.64685e-18	9.08901e-17	30.4798	7948630	FADS3	down	3995
-0.188232	7.50857	-9.24568	3.65579e-18	9.10448e-17	30.4774	8090295	SLC41A3	stable	54946
-0.227086	6.98553	-9.24557	3.65878e-18	9.10511e-17	30.4766	8075217	AP1B1	stable	162
0.279895	5.89942	9.24356	3.71307e-18	9.23331e-17	30.462	8121632	KPNA5	stable	3841
-0.582882	8.36271	-9.24203	3.75523e-18	9.31727e-17	30.4509	8140840	STEAP4	down	79689
0.524329	9.61834	9.23767	3.87736e-18	9.61314e-17	30.4194	7934997	PPP1R3C	up	5507
-0.355416	6.80102	-9.23731	3.88764e-18	9.63145e-17	30.4168	8111129	ZNF622	stable	90441
0.188311	10.7866	9.23565	3.93543e-18	9.7426e-17	30.4047	8041995	SPTBN1	stable	6711
-0.22341	9.53682	-9.2299	4.10528e-18	1.0133e-16	30.3631	7915733	PRDX1	stable	5052
-0.313234	5.1938	-9.22434	4.27641e-18	1.05475e-16	30.3228	7981013	PRIMA1	stable	145270
-0.304871	4.76227	-9.21421	4.60635e-18	1.13445e-16	30.2496	7940643	ASRGL1	stable	80150
-0.188929	7.43328	-9.21171	4.69179e-18	1.15398e-16	30.2315	8154872	UBAP1	stable	51271
-0.172722	6.73248	-9.21158	4.69605e-18	1.15398e-16	30.2306	8032755	ZBTB7A	stable	51341
-0.213478	6.78181	-9.20284	5.00696e-18	1.22766e-16	30.1674	8158009	SLC2A8	stable	29988
-0.176823	7.5306	-9.2027	5.01235e-18	1.22808e-16	30.1664	8037816	STRN4	stable	29888
-0.290576	6.96186	-9.19533	5.2905e-18	1.29433e-16	30.1132	8172531	PRAF2	stable	11230
-0.252064	6.64728	-9.19473	5.3137e-18	1.2984e-16	30.1088	8067409	LAMA5	stable	3911
0.279345	7.61362	9.1947	5.31497e-18	1.2984e-16	30.1086	7935647	COX15	stable	1355
-0.18773	8.34423	-9.18854	5.56048e-18	1.35739e-16	30.0641	8016099	EFTUD2	stable	9343
0.824252	8.09726	9.18743	5.60589e-18	1.36747e-16	30.0561	8106573	THBS4	up	7060
0.233512	8.65617	9.18674	5.63414e-18	1.37235e-16	30.0511	8081171	CRYBG3	stable	131544
0.276248	6.60884	9.18493	5.7094e-18	1.38966e-16	30.0381	7953765	RIMKLB	stable	57494
-0.295525	7.67916	-9.18353	5.76849e-18	1.40302e-16	30.0279	8082940	ARMC8	stable	25852
-0.26587	6.91418	-9.18248	5.81279e-18	1.41276e-16	30.0204	8044295	SH3RF3	stable	344558
-0.224379	6.1889	-9.1821	5.82911e-18	1.41558e-16	30.0176	8003217	EMC8	stable	10328
0.233241	7.70674	9.18201	5.83287e-18	1.41558e-16	30.017	8102171	TBCK	stable	93627
0.321036	4.475	9.18039	5.90271e-18	1.43148e-16	30.0053	8147244	NECAB1	stable	64168
-0.499248	5.71243	-9.18028	5.90722e-18	1.43153e-16	30.0045	8109194	SLC26A2	down	1836
-0.226681	5.18038	-9.18011	5.91444e-18	1.43224e-16	30.0033	8004385	NLGN2	stable	57555
-0.184141	7.76139	-9.17923	5.953e-18	1.44053e-16	29.9969	8087885	BAP1	stable	8314
0.248651	7.702	9.17912	5.95763e-18	1.44061e-16	29.9961	7945283	ACAD8	stable	27034
-0.22708	7.44463	-9.17765	6.02225e-18	1.45412e-16	29.9855	8153684	DGAT1	stable	8694
-0.68665	5.98997	-9.17543	6.12081e-18	1.47684e-16	29.9695	7973067	PNP	down	4860
0.14089	10.7562	9.17393	6.18836e-18	1.49206e-16	29.9587	8069644	APP	stable	351
-0.785825	9.10149	-9.17005	6.36671e-18	1.53395e-16	29.9307	8123744	F13A1	down	2162
-0.537057	5.34632	-9.16865	6.43236e-18	1.54865e-16	29.9206	8081853	POGLUT1	down	56983
0.325327	7.05003	9.16554	6.58013e-18	1.58308e-16	29.8982	8097867	TMEM131L	stable	23240
-0.273736	6.07153	-9.16535	6.5895e-18	1.58419e-16	29.8968	8079462	NBEAL2	stable	23218
-0.227932	8.49492	-9.16491	6.61089e-18	1.58819e-16	29.8936	8104422	MTRR	stable	4552
0.316466	7.62609	9.15451	7.13332e-18	1.7116e-16	29.8187	8083166	TRPC1	stable	7220
-0.424291	7.38302	-9.15448	7.13489e-18	1.7116e-16	29.8185	8146921	RDH10	down	157506
0.440384	5.77068	9.15416	7.15169e-18	1.7144e-16	29.8162	8043687	ANKRD36	up	375248
-0.31809	7.55798	-9.15052	7.34459e-18	1.75937e-16	29.7899	8016168	PLCD3	stable	113026
0.307381	6.16925	9.14801	7.48031e-18	1.7906e-16	29.7719	8134117	FZD1	stable	8321
-0.261086	9.81265	-9.14708	7.53118e-18	1.80148e-16	29.7652	7966996	RPLP0	stable	6175
0.259743	8.90775	9.14694	7.53916e-18	1.80209e-16	29.7642	8001211	ITFG1	stable	81533
-0.478843	7.51769	-9.14633	7.57279e-18	1.80883e-16	29.7598	7928944	PAPSS2	down	9060
1.55513	7.68303	9.14563	7.61164e-18	1.81681e-16	29.7547	7946033	HBB	up	3043
0.510916	6.12747	9.14477	7.65958e-18	1.82694e-16	29.7486	7917561	GBP4	up	115361
-0.23995	5.1083	-9.14401	7.7022e-18	1.83579e-16	29.7431	8064014	SLC17A9	stable	63910
0.248817	5.42856	9.14376	7.71659e-18	1.83791e-16	29.7413	8159501	LCN12	stable	286256
-0.229969	7.58195	-9.14306	7.7557e-18	1.8459e-16	29.7363	8016018	SLC25A39	stable	51629
-0.303172	7.26155	-9.14179	7.82824e-18	1.86183e-16	29.7271	8018793	JMJD6	stable	23210
0.37452	7.12174	9.14142	7.84918e-18	1.86548e-16	29.7245	7953341	TAPBPL	stable	55080
0.210518	6.23332	9.14016	7.92219e-18	1.88149e-16	29.7153	8023766	RTTN	stable	25914
0.365368	8.67293	9.13818	8.03756e-18	1.90753e-16	29.7011	8068024	JAM2	stable	58494
0.20232	5.49462	9.13771	8.06503e-18	1.91269e-16	29.6977	8145835	ERLIN2	stable	11160
0.274397	6.52297	9.13338	8.32412e-18	1.97273e-16	29.6666	7957404	METTL25	stable	84190
-0.676459	5.15674	-9.13297	8.34938e-18	1.97731e-16	29.6636	8097903	TLR2	down	7097
0.305331	9.84678	9.12685	8.73052e-18	2.0661e-16	29.6196	8052956	EXOC6B	stable	23233
-0.172361	9.16401	-9.12618	8.77379e-18	2.07486e-16	29.6148	8029560	CLPTM1	stable	1209
-0.29109	6.34887	-9.12234	9.02316e-18	2.1293e-16	29.5871	7910630	COA6	stable	388753
0.296866	5.9532	9.12207	9.04044e-18	2.13187e-16	29.5853	8093878	EVC	stable	2121
0.274903	5.44296	9.12145	9.08193e-18	2.14014e-16	29.5807	8146945	GDAP1	stable	54332
0.300837	6.00155	9.11979	9.19203e-18	2.16455e-16	29.5689	8114030	KIF3A	stable	11127
-0.271444	6.47039	-9.11954	9.20902e-18	2.16702e-16	29.5671	8032804	SH3GL1	stable	6455
-0.550058	7.67506	-9.11476	9.53584e-18	2.24075e-16	29.5327	7977933	SLC7A8	down	23428
-0.204559	6.68363	-9.11393	9.59391e-18	2.25281e-16	29.5267	8076673	RTL6	stable	84247
0.218921	7.36528	9.11124	9.78382e-18	2.29417e-16	29.5074	8008493	LUC7L3	stable	51747
0.263009	9.30243	9.10995	9.87627e-18	2.31259e-16	29.4981	7905099	VPS45	stable	11311
-0.225807	8.61806	-9.1068	1.01057e-17	2.36299e-16	29.4755	7913357	ECE1	stable	1889
0.235066	7.71016	9.10401	1.03133e-17	2.40983e-16	29.4555	8066303	CHD6	stable	84181
-0.202411	7.42203	-9.10339	1.03599e-17	2.41903e-16	29.451	8160756	DCAF12	stable	25853
-0.492194	5.46882	-9.10325	1.03708e-17	2.41989e-16	29.45	7965918	NT5DC3	down	51559
-0.291516	6.57729	-9.10292	1.03956e-17	2.42398e-16	29.4477	8027566	CEBPG	stable	1054
0.293978	7.016	9.10147	1.05059e-17	2.44798e-16	29.4373	8147019	ZC2HC1A	stable	51101
-0.22853	5.75958	-9.09947	1.06603e-17	2.48222e-16	29.4229	8171079	GTPBP6	stable	8225
0.31077	7.18323	9.09593	1.09392e-17	2.54536e-16	29.3975	7973826	NUBPL	stable	80224
-0.30285	6.55948	-9.09569	1.09583e-17	2.54803e-16	29.3957	8043552	KCNIP3	stable	30818
-0.291064	5.4298	-9.09531	1.09884e-17	2.55325e-16	29.393	8018305	JPT1	stable	51155
-0.240225	6.00077	-9.09193	1.12627e-17	2.61333e-16	29.3687	8072216	GAS2L1	stable	10634
-0.234895	7.1629	-9.0888	1.15223e-17	2.67171e-16	29.3463	8155096	CREB3	stable	10488
0.244242	6.61096	9.0821	1.20985e-17	2.80142e-16	29.2982	7971573	RCBTB2	stable	1102
-0.257003	7.5123	-9.07426	1.28091e-17	2.96389e-16	29.242	8125887	TEAD3	stable	7005
0.584439	7.27817	9.06917	1.32914e-17	3.07337e-16	29.2056	8039340	TNNT1	up	7138
-0.266626	5.57311	-9.0684	1.33667e-17	3.08864e-16	29.2	7967358	PITPNM2	stable	57605
0.325172	9.47833	9.06411	1.379e-17	3.17982e-16	29.1693	8027760	FXYD1	stable	5348
-0.307704	5.36818	-9.06235	1.39677e-17	3.21856e-16	29.1567	7967588	DHX37	stable	57647
-0.185403	5.60652	-9.06219	1.39842e-17	3.22014e-16	29.1555	8034754	SAMD1	stable	90378
-0.168615	7.24751	-9.06009	1.4199e-17	3.26508e-16	29.1405	8016508	SNF8	stable	11267
-0.361711	6.21256	-9.05918	1.42938e-17	3.28387e-16	29.134	8035782	ZNF682	stable	91120
0.466945	7.66275	9.05911	1.43004e-17	3.28387e-16	29.1335	7907531	GPR52	up	9293
-0.253516	6.65842	-9.058	1.44164e-17	3.30822e-16	29.1256	8126214	MOCS1	stable	4337
0.594697	6.22629	9.05746	1.44735e-17	3.31905e-16	29.1217	8035825	ZNF676	up	163223
0.233755	5.28396	9.0565	1.45744e-17	3.33988e-16	29.1148	8036309	ZFP82	stable	284406
0.426076	8.73701	9.05598	1.46302e-17	3.35036e-16	29.111	8102950	INPP4B	up	8821
-0.194748	6.57194	-9.05514	1.47196e-17	3.36852e-16	29.105	8008922	PPM1D	stable	8493
0.506009	5.197	9.05346	1.49e-17	3.40511e-16	29.0931	8095110	KIT	up	3815
-0.420811	7.47366	-9.05191	1.50683e-17	3.44122e-16	29.082	7950555	LRRC32	down	2615
-0.24227	7.23567	-9.05067	1.52052e-17	3.46534e-16	29.0731	8118661	PFDN6	stable	10471
0.278899	7.5802	9.0493	1.5357e-17	3.49755e-16	29.0633	8154785	CHMP5	stable	51510
0.247775	6.48746	9.04649	1.56742e-17	3.56735e-16	29.0432	7994961	CTF1	stable	1489
-0.19543	5.53848	-9.04437	1.59168e-17	3.61763e-16	29.028	8038571	JOSD2	stable	126119
0.392404	6.00512	9.04391	1.59705e-17	3.62736e-16	29.0247	8111153	MYO10	stable	4651
0.188729	6.37615	9.04282	1.6097e-17	3.64863e-16	29.0169	7933999	RUFY2	stable	55680
0.262227	5.77255	9.0417	1.62284e-17	3.67589e-16	29.0089	8047709	PARD3B	stable	117583
-0.812249	4.9693	-9.04137	1.62674e-17	3.68223e-16	29.0066	7950425	CHRDL2	down	25884
0.209692	3.41919	9.04078	1.63382e-17	3.69574e-16	29.0023	8144230	ZNF596	stable	169270
-0.154715	7.12355	-9.04052	1.6369e-17	3.70018e-16	29.0004	7900979	RNF220	stable	55182
-0.165651	7.09262	-9.03967	1.64703e-17	3.71803e-16	28.9944	7999478	TXNDC11	stable	51061
-0.26204	6.99136	-9.03723	1.67642e-17	3.77926e-16	28.9769	8110803	CLPTM1L	stable	81037
-0.601813	7.51509	-9.03655	1.68473e-17	3.79543e-16	28.9721	8043995	IL1R1	down	3554
0.305748	4.3274	9.03264	1.73322e-17	3.90203e-16	28.9441	8071489	P2RX6	stable	9127
-0.164449	6.81694	-9.03207	1.74034e-17	3.91541e-16	28.9401	7966570	DDX54	stable	79039
0.36425	7.60137	9.02479	1.83483e-17	4.12359e-16	28.888	8151496	ZNF704	stable	619279
0.596734	5.1853	9.02475	1.83535e-17	4.12359e-16	28.8877	7921955	RXRG	up	6258
0.291644	5.14611	9.02176	1.87554e-17	4.21104e-16	28.8664	8166096	TCEANC	stable	170082
-0.168912	7.52681	-9.02065	1.89069e-17	4.24221e-16	28.8585	8148824	HSF1	stable	3297
0.258564	6.63105	9.02038	1.89438e-17	4.24763e-16	28.8565	7928354	FAM149B1	stable	317662
0.380467	5.17635	9.0199	1.90099e-17	4.25957e-16	28.8531	7930320	CFAP58	stable	159686
0.302815	4.88869	9.0168	1.9443e-17	4.3537e-16	28.8309	8106210	ARHGEF28	stable	64283
-0.39981	6.17569	-9.01482	1.97234e-17	4.41351e-16	28.8168	8176133	G6PD	down	2539
-0.197406	8.25981	-9.01079	2.03084e-17	4.54137e-16	28.788	8061958	CHMP4B	stable	128866
0.308428	4.05026	9.00999	2.04269e-17	4.5648e-16	28.7823	8014903	GSDMB	stable	55876
0.218033	6.81107	9.00665	2.09262e-17	4.67324e-16	28.7585	7961371	DUSP16	stable	80824
0.188811	7.41823	9.00515	2.1155e-17	4.72116e-16	28.7478	8097066	METTL14	stable	57721
-0.173753	9.34567	-9.00048	2.18828e-17	4.87378e-16	28.7145	8160011	KIAA2026	stable	158358
0.37164	3.59673	8.99694	2.2452e-17	4.98721e-16	28.6892	7902452	AK5	stable	26289
-0.266089	6.43053	-8.98588	2.43223e-17	5.38471e-16	28.6104	8076403	NAGA	stable	4668
-0.365251	8.94428	-8.98573	2.43486e-17	5.38695e-16	28.6093	8157270	SLC31A1	stable	1317
-0.32524	7.05795	-8.98148	2.51087e-17	5.55142e-16	28.5791	8021154	CTIF	stable	9811
-0.235696	5.9528	-8.97916	2.55349e-17	5.6419e-16	28.5625	8164452	ZDHHC12	stable	84885
-0.256103	6.45345	-8.97689	2.59577e-17	5.72773e-16	28.5463	8060339	NRSN2	stable	80023
0.308938	7.44654	8.97447	2.64162e-17	5.82504e-16	28.5291	8088911	ZNF717	stable	100131827
-0.22138	6.39005	-8.97428	2.64518e-17	5.82904e-16	28.5277	7978239	RABGGTA	stable	5875
-0.707716	7.93373	-8.97209	2.68748e-17	5.91831e-16	28.5121	7898805	C1QB	down	713
0.178357	8.75683	8.97081	2.71234e-17	5.96913e-16	28.503	8172119	MED14	stable	9282
0.198764	9.51705	8.969	2.74806e-17	6.03974e-16	28.4902	7898910	PNRC2	stable	55629
0.253666	8.34554	8.9666	2.79625e-17	6.14161e-16	28.473	8030946	ZNF808	stable	388558
-0.1683	7.16103	-8.96406	2.84802e-17	6.25118e-16	28.455	8024660	HMG20B	stable	10362
-0.222906	5.60163	-8.96343	2.86104e-17	6.27562e-16	28.4505	7952132	SLC37A4	stable	2542
-0.471932	9.03581	-8.96103	2.91104e-17	6.38109e-16	28.4334	7910164	COQ8A	down	56997
-0.172204	7.73275	-8.95839	2.96714e-17	6.4998e-16	28.4146	8150928	NSMAF	stable	8439
-0.191533	7.54615	-8.95798	2.97581e-17	6.51449e-16	28.4117	8032650	PIP5K1C	stable	23396
-0.212369	10.4108	-8.95492	3.04244e-17	6.65599e-16	28.3899	7958000	CHPT1	stable	56994
-0.350806	5.72676	-8.95227	3.10123e-17	6.77781e-16	28.3711	8115907	NOP16	stable	51491
0.271785	4.57917	8.95222	3.1022e-17	6.77781e-16	28.3708	8066231	KIAA1755	stable	85449
0.276163	6.52619	8.9499	3.15458e-17	6.88775e-16	28.3543	8133057	ZNF138	stable	7697
-0.229923	5.27254	-8.94978	3.15734e-17	6.88925e-16	28.3534	8012099	PHF23	stable	79142
0.220074	7.61383	8.94352	3.30346e-17	7.20335e-16	28.3089	8035795	ZNF626	stable	199777
-0.195835	6.74468	-8.94201	3.33952e-17	7.27722e-16	28.2982	8109428	SAP30L	stable	79685
0.324497	5.01426	8.94042	3.37801e-17	7.35602e-16	28.2869	8095021	SPATA18	stable	132671
-0.236764	7.81942	-8.94034	3.3801e-17	7.35602e-16	28.2863	8139299	POLD2	stable	5425
-0.597297	3.61657	-8.93604	3.48657e-17	7.58278e-16	28.2557	8117288	SCGN	down	10590
-0.262103	5.68301	-8.93483	3.51711e-17	7.6442e-16	28.2472	8160682	NOL6	stable	65083
0.162298	6.06517	8.93252	3.57605e-17	7.76723e-16	28.2308	8085340	VGLL4	stable	9686
-0.192778	7.85667	-8.92824	3.68825e-17	8.00571e-16	28.2004	7900216	AKIRIN1	stable	79647
-0.289725	5.69059	-8.92653	3.73405e-17	8.09458e-16	28.1882	8053842	GPAT2	stable	150763
0.277972	5.35453	8.92589	3.75119e-17	8.12644e-16	28.1837	8112596	ANKRA2	stable	57763
0.260611	5.94155	8.92232	3.84895e-17	8.33279e-16	28.1584	7925130	TARBP1	stable	6894
0.357279	7.55471	8.91937	3.93185e-17	8.50675e-16	28.1374	8129888	NHSL1	stable	57224
0.244765	5.29653	8.91811	3.96745e-17	8.57262e-16	28.1285	7929932	KAZALD1	stable	81621
-0.306581	8.50651	-8.91359	4.09893e-17	8.85097e-16	28.0964	8037657	DMPK	stable	1760
-0.164931	6.50798	-8.91236	4.13548e-17	8.92411e-16	28.0877	7916135	CC2D1B	stable	200014
0.368155	6.1815	8.91059	4.18844e-17	9.03254e-16	28.0751	8038117	DBP	stable	1628
0.400301	5.91823	8.90679	4.30462e-17	9.27708e-16	28.0482	7958895	OAS3	up	4940
0.436313	6.4991	8.90572	4.33786e-17	9.34268e-16	28.0406	8055323	NCKAP5	up	344148
0.183105	5.16481	8.90421	4.38538e-17	9.43891e-16	28.0299	7977482	TTC5	stable	91875
-0.366692	9.03434	-8.90382	4.39776e-17	9.45943e-16	28.0271	8145122	SLC39A14	stable	23516
0.186609	7.74756	8.9013	4.47805e-17	9.62594e-16	28.0093	7926565	MLLT10	stable	8028
0.195336	7.22598	8.90121	4.48113e-17	9.62634e-16	28.0086	8139165	VPS41	stable	27072
-0.203458	7.24164	-8.89667	4.62997e-17	9.93966e-16	27.9764	7991630	TM2D3	stable	80213
0.534171	6.79547	8.89563	4.66451e-17	1.00074e-15	27.9691	8108697	PCDHB5	up	26167
0.235821	4.71275	8.89404	4.71841e-17	1.01165e-15	27.9578	8050713	PFN4	stable	375189
-0.195994	6.63141	-8.89252	4.77008e-17	1.02141e-15	27.9471	8033912	DNMT1	stable	1786
-0.178327	6.12337	-8.88976	4.86569e-17	1.04121e-15	27.9275	7991258	POLG	stable	5428
0.204121	4.47956	8.88807	4.92536e-17	1.05331e-15	27.9155	7915982	BEND5	stable	79656
-0.242538	8.07634	-8.88555	5.01544e-17	1.07188e-15	27.8977	8090678	MRPL3	stable	11222
0.394116	6.99775	8.88413	5.06683e-17	1.08217e-15	27.8877	7933821	RHOBTB1	stable	9886
0.349226	6.85198	8.88381	5.07849e-17	1.08397e-15	27.8854	8145865	ADGRA2	stable	25960
0.280371	4.27362	8.88342	5.09263e-17	1.08629e-15	27.8827	7980537	STON2	stable	85439
-0.343474	6.42936	-8.88298	5.10895e-17	1.08907e-15	27.8795	8003892	SMTNL2	stable	342527
-0.429528	8.06481	-8.87911	5.25287e-17	1.11832e-15	27.8522	8134552	ARPC1B	down	10095
0.469109	4.58338	8.8753	5.39868e-17	1.14863e-15	27.8252	8166028	FRMPD4	up	9758
0.315547	6.94166	8.87404	5.44803e-17	1.15839e-15	27.8162	8152606	SNTB1	stable	6641
-0.223695	6.41058	-8.87196	5.52978e-17	1.17502e-15	27.8016	8134904	POP7	stable	10248
-0.239099	5.70068	-8.87147	5.54932e-17	1.17767e-15	27.7981	8032275	MBD3	stable	53615
0.599598	5.51777	8.86986	5.61408e-17	1.19065e-15	27.7867	8173299	EDA2R	up	60401
-0.256054	6.90157	-8.86714	5.72478e-17	1.21258e-15	27.7675	8114767	PCDH1	stable	5097
0.454897	6.17911	8.86558	5.78905e-17	1.22542e-15	27.7565	8068697	MX2	up	4600
-0.214217	5.99217	-8.86364	5.87017e-17	1.2418e-15	27.7428	7985349	TLNRD1	stable	59274
0.337811	6.0804	8.86072	5.99456e-17	1.26588e-15	27.7221	7900159	DNALI1	stable	7802
-0.171121	7.41643	-8.86069	5.99597e-17	1.26588e-15	27.7219	7990092	MYO9A	stable	4649
0.199818	8.33003	8.86048	6.00512e-17	1.26632e-15	27.7204	7934367	ANXA7	stable	310
0.448446	7.98481	8.86	6.0259e-17	1.2691e-15	27.717	7972912	DCUN1D2	up	55208
-0.375894	6.12442	-8.85936	6.05372e-17	1.27415e-15	27.7124	8142585	CADPS2	stable	93664
0.540686	4.69525	8.85736	6.14099e-17	1.2917e-15	27.6984	8114977	HTR4	up	3360
0.521278	9.00822	8.85496	6.24774e-17	1.31333e-15	27.6814	7916616	CYP2J2	up	1573
-0.214396	7.17161	-8.85479	6.25534e-17	1.3141e-15	27.6802	8160857	SIGMAR1	stable	10280
0.330242	6.75763	8.85452	6.26766e-17	1.31585e-15	27.6782	8127346	RAB23	stable	51715
0.201125	5.96404	8.85312	6.33096e-17	1.3283e-15	27.6684	8035958	CEP89	stable	84902
-0.345679	8.10138	-8.84955	6.49476e-17	1.3601e-15	27.6432	8032392	MKNK2	stable	2872
-0.250709	4.63526	-8.84924	6.50926e-17	1.36228e-15	27.641	7983306	WDR76	stable	79968
-0.197601	7.24888	-8.84915	6.51349e-17	1.36231e-15	27.6404	7984203	ZNF609	stable	23060
-0.165433	5.72994	-8.84653	6.63713e-17	1.3873e-15	27.6219	8073960	PIM3	stable	415116
0.190384	8.2298	8.84244	6.83486e-17	1.42773e-15	27.593	7916969	ZRANB2	stable	9406
-0.218876	6.26924	-8.83952	6.97932e-17	1.45699e-15	27.5724	7923483	RABIF	stable	5877
-0.709947	7.4975	-8.83557	7.17963e-17	1.49787e-15	27.5445	8026971	IFI30	down	10437
0.253332	8.34205	8.82981	7.48205e-17	1.55999e-15	27.5039	7964413	R3HDM2	stable	22864
-0.19567	8.67031	-8.82786	7.58756e-17	1.58099e-15	27.4901	7912166	RERE	stable	473
-0.398289	2.96666	-8.82745	7.60964e-17	1.5846e-15	27.4872	8166314	PPEF1	down	5475
-0.194086	8.78517	-8.8271	7.62893e-17	1.58763e-15	27.4847	7974352	RTRAF	stable	51637
-0.362593	7.92326	-8.82586	7.69682e-17	1.60076e-15	27.476	8125059	CLIC1	stable	1192
0.236057	7.10126	8.82551	7.71635e-17	1.60382e-15	27.4735	7954029	CDKN1B	stable	1027
-0.235253	8.0169	-8.82452	7.77129e-17	1.61322e-15	27.4665	8091009	PIK3CB	stable	5291
-0.19455	5.74591	-8.81828	8.12596e-17	1.68475e-15	27.4226	8019754	MCRIP1	stable	348262
1.00546	8.52395	8.81612	8.25274e-17	1.70996e-15	27.4074	8111864	C6	up	729
-0.606827	6.4623	-8.81008	8.61715e-17	1.78214e-15	27.3648	8106730	XRCC4	down	7518
0.211913	5.43258	8.80661	8.83368e-17	1.82579e-15	27.3404	8075828	IFT27	stable	11020
-0.466954	7.50121	-8.80621	8.85901e-17	1.82989e-15	27.3376	7958600	ANKRD13A	down	88455
-0.165495	8.43442	-8.80583	8.88308e-17	1.83372e-15	27.3349	8016725	ANKRD40	stable	91369
0.418226	8.01155	8.80347	9.03428e-17	1.86378e-15	27.3183	7984588	THSD4	up	79875
-0.178241	7.67533	-8.80068	9.21681e-17	1.89674e-15	27.2986	8117929	ABCF1	stable	23
0.204719	5.56722	8.8005	9.22828e-17	1.89793e-15	27.2974	7940451	TKFC	stable	26007
-0.240081	6.82765	-8.79316	9.72546e-17	1.99648e-15	27.2457	7964033	ANKRD52	stable	283373
0.13696	8.63009	8.7916	9.8348e-17	2.01768e-15	27.2347	7965123	PPP1R12A	stable	4659
-1.00904	6.97474	-8.78979	9.96283e-17	2.04269e-15	27.222	7920244	S100A8	down	6279
0.234503	5.68128	8.78786	1.01007e-16	2.06967e-15	27.2085	8098556	PRIMPOL	stable	201973
0.415904	10.0248	8.78728	1.01428e-16	2.07702e-15	27.2044	8121749	GJA1	up	2697
-0.313832	6.38819	-8.78398	1.03851e-16	2.12301e-15	27.1811	8156761	NANS	stable	54187
-0.251905	7.66646	-8.78396	1.03865e-16	2.12301e-15	27.181	8161857	RFK	stable	55312
-0.548426	7.19733	-8.78059	1.06393e-16	2.17203e-15	27.1573	8119161	PIM1	down	5292
-0.168895	6.49616	-8.7803	1.0661e-16	2.17512e-15	27.1553	7898483	ARHGEF10L	stable	55160
-0.278502	7.91249	-8.7785	1.07994e-16	2.202e-15	27.1426	7911993	ICMT	stable	23463
0.204676	7.36111	8.7775	1.08764e-16	2.21634e-15	27.1356	8082607	ATP2C1	stable	27032
-0.233611	6.16095	-8.77051	1.14331e-16	2.32837e-15	27.0865	8157828	ARPC5L	stable	81873
-0.243518	8.23021	-8.76945	1.15202e-16	2.34467e-15	27.079	8007023	MSL1	stable	339287
-0.337595	7.01062	-8.76748	1.16832e-16	2.3764e-15	27.0652	8103011	OTUD4	stable	54726
0.28988	4.56611	8.76518	1.18762e-16	2.41271e-15	27.049	8055697	RBM43	stable	375287
-0.234675	8.43755	-8.76474	1.19132e-16	2.41786e-15	27.046	7901140	MAST2	stable	23139
-0.68584	7.38407	-8.76471	1.19161e-16	2.41786e-15	27.0457	7903893	CD53	down	963
0.301084	10.0883	8.76187	1.21601e-16	2.46587e-15	27.0258	7932796	SVIL	stable	6840
-0.347127	6.20455	-8.76058	1.22723e-16	2.48558e-15	27.0168	7938880	HTATIP2	stable	10553
0.328139	10.8266	8.76041	1.22875e-16	2.48715e-15	27.0155	8104035	SORBS2	stable	8470
0.188559	5.70732	8.75019	1.32154e-16	2.67172e-15	26.9439	8010949	GLOD4	stable	51031
0.178715	8.54384	8.74966	1.32661e-16	2.68036e-15	26.9401	8048772	RHBDD1	stable	84236
-0.214106	7.01671	-8.74886	1.33414e-16	2.69392e-15	26.9345	8122343	HECA	stable	51696
0.34914	5.23236	8.7478	1.34428e-16	2.71276e-15	26.9271	7927876	TET1	stable	80312
0.290527	8.54556	8.7461	1.36067e-16	2.74254e-15	26.9151	8169009	BEX4	stable	56271
-0.247267	6.82673	-8.7461	1.36069e-16	2.74254e-15	26.9151	8028552	NFKBIB	stable	4793
-0.19438	8.73954	-8.74208	1.40017e-16	2.82042e-15	26.887	7930031	GBF1	stable	8729
0.308801	4.44058	8.74123	1.40872e-16	2.83593e-15	26.881	7979524	TMEM30B	stable	161291
-0.344589	5.98315	-8.7391	1.43026e-16	2.87754e-15	26.8661	7900510	CTPS1	stable	1503
0.253598	6.67328	8.73827	1.43873e-16	2.89284e-15	26.8602	8025868	CCDC159	stable	126075
-0.174597	5.369	-8.73712	1.45051e-16	2.91477e-15	26.8522	7941039	RPS6KA4	stable	8986
-0.249956	6.71905	-8.73324	1.49111e-16	2.99274e-15	26.825	7980338	IRF2BPL	stable	64207
0.235515	5.58283	8.73283	1.49549e-16	2.99972e-15	26.8222	8034379	ZNF442	stable	79973
0.261757	5.5975	8.73134	1.5114e-16	3.02981e-15	26.8117	7942476	PAAF1	stable	80227
0.483367	6.18175	8.72927	1.53385e-16	3.07295e-15	26.7972	7941148	TM7SF2	up	7108
0.332636	4.8339	8.72706	1.55814e-16	3.11974e-15	26.7818	8113050	CETN3	stable	1070
0.684335	8.98956	8.72367	1.59617e-16	3.19397e-15	26.758	7927474	C10orf71	up	118461
-0.223133	6.85709	-8.72183	1.61721e-16	3.23412e-15	26.7451	8026541	FAM32A	stable	26017
0.202934	8.43936	8.7214	1.62221e-16	3.24218e-15	26.7421	8120441	PHF3	stable	23469
0.645057	8.64052	8.72014	1.63676e-16	3.26929e-15	26.7333	7997332	NUDT7	up	283927
-0.227526	5.01457	-8.71897	1.6505e-16	3.29459e-15	26.7251	7986110	FES	stable	2242
0.215856	5.80727	8.71889	1.6514e-16	3.29459e-15	26.7245	8093829	ZBTB49	stable	166793
0.16121	4.82006	8.71377	1.71258e-16	3.4146e-15	26.6887	7980690	EFCAB11	stable	90141
-0.340794	7.74533	-8.71116	1.74472e-16	3.47544e-15	26.6704	8170590	NSDHL	stable	50814
0.542416	4.42974	8.71112	1.74518e-16	3.47544e-15	26.6702	8154491	ADAMTSL1	up	92949
-0.381586	8.32213	-8.70668	1.80119e-16	3.58269e-15	26.6391	8077993	TMEM43	stable	79188
-0.249108	7.94482	-8.70017	1.88639e-16	3.74768e-15	26.5936	7987385	MEIS2	stable	4212
-0.362714	7.81899	-8.69787	1.91746e-16	3.80487e-15	26.5775	8041582	PKDCC	stable	91461
-0.22457	6.71519	-8.69762	1.92082e-16	3.80926e-15	26.5758	8111457	RAD1	stable	5810
0.294044	7.88487	8.69318	1.98243e-16	3.92444e-15	26.5447	8044450	ZC3H6	stable	376940
0.128194	8.80795	8.69073	2.01713e-16	3.99011e-15	26.5277	8006030	TAOK1	stable	57551
-0.562101	7.08902	-8.69067	2.018e-16	3.99011e-15	26.5272	8151223	SLCO5A1	down	81796
0.340663	7.12755	8.68979	2.03072e-16	4.01287e-15	26.521	8088397	ACOX2	stable	8309
-0.138574	6.71419	-8.68946	2.03544e-16	4.01981e-15	26.5188	8074003	TRABD	stable	80305
0.382428	6.59617	8.68626	2.08211e-16	4.10954e-15	26.4964	7957551	SOCS2	stable	8835
-0.276174	5.62048	-8.68585	2.08826e-16	4.11923e-15	26.4935	7958577	FAM222A	stable	84915
-0.298182	7.40018	-8.68496	2.1014e-16	4.14271e-15	26.4874	7974303	TMX1	stable	81542
0.272064	5.34749	8.68281	2.13378e-16	4.20156e-15	26.4723	7939507	ACCS	stable	84680
-0.530589	6.22231	-8.67962	2.18261e-16	4.29263e-15	26.4501	8002303	NQO1	down	1728
0.228274	7.0328	8.67924	2.18844e-16	4.30156e-15	26.4474	8116227	CLK4	stable	57396
0.42515	8.28789	8.67802	2.20753e-16	4.33652e-15	26.4389	7935058	MYOF	up	26509
0.330549	7.37376	8.67584	2.24184e-16	4.39874e-15	26.4237	7963187	LIMA1	stable	51474
-0.205399	3.63559	-8.67544	2.2483e-16	4.40881e-15	26.4209	8013771	TLCD1	stable	116238
0.167376	6.89555	8.67339	2.28121e-16	4.47072e-15	26.4066	8020930	ELP2	stable	55250
0.341997	7.48311	8.67077	2.324e-16	4.54775e-15	26.3883	8017704	AMZ2P1	stable	201283
-0.175555	5.646	-8.67074	2.32443e-16	4.54775e-15	26.3881	7934244	DNAJB12	stable	54788
-0.170804	10.5458	-8.67073	2.32461e-16	4.54775e-15	26.388	8130567	TCP1	stable	6950
0.15969	6.2013	8.66795	2.37078e-16	4.63534e-15	26.3687	8000263	COG7	stable	91949
0.280372	5.26378	8.66749	2.37868e-16	4.64805e-15	26.3654	8140504	MAGI2	stable	9863
-0.159689	8.30976	-8.66697	2.38733e-16	4.66222e-15	26.3618	8122672	TAB2	stable	23118
0.281596	7.88177	8.66656	2.39433e-16	4.67314e-15	26.3589	8147461	SDC2	stable	6383
0.317026	6.09421	8.66263	2.46197e-16	4.80236e-15	26.3315	8155898	PCSK5	stable	5125
-0.363879	8.5151	-8.6624	2.46589e-16	4.80719e-15	26.33	8088415	FAM107A	stable	11170
0.210477	3.66142	8.66132	2.48492e-16	4.84145e-15	26.3224	8034851	ADGRE3	stable	84658
0.205715	5.59414	8.657	2.56204e-16	4.98879e-15	26.2923	7980069	FAM161B	stable	145483
-0.225978	8.36345	-8.6566	2.56944e-16	5.00027e-15	26.2895	8127051	TRAM2	stable	9697
0.155987	7.29443	8.6521	2.65259e-16	5.15606e-15	26.2581	8123494	FAM120B	stable	84498
0.239264	5.36286	8.65012	2.69006e-16	5.22584e-15	26.2443	7915682	ZSWIM5	stable	57643
-0.365776	5.7995	-8.64974	2.69729e-16	5.23684e-15	26.2417	7915147	FHL3	stable	2275
0.335517	9.34663	8.64959	2.7001e-16	5.23923e-15	26.2407	8064100	PPDPF	stable	79144
0.324136	6.05927	8.63997	2.89022e-16	5.60162e-15	26.1737	8122242	PEX7	stable	5191
0.550415	8.32729	8.63371	3.0211e-16	5.85186e-15	26.1301	8115397	FAXDC2	up	10826
0.165858	7.76323	8.62845	3.13563e-16	6.06665e-15	26.0935	8129181	GOPC	stable	57120
0.320649	6.05443	8.62647	3.17979e-16	6.14495e-15	26.0798	7974816	SLC38A6	stable	145389
0.298717	7.46902	8.62197	3.28236e-16	6.33949e-15	26.0485	8146533	FAM110B	stable	90362
0.233163	8.19009	8.6201	3.32616e-16	6.42035e-15	26.0355	7989516	HERC1	stable	8925
-1.02102	6.15255	-8.61997	3.32917e-16	6.42245e-15	26.0346	8095736	AREG	down	374
0.228394	5.97277	8.61968	3.33603e-16	6.43195e-15	26.0326	8060977	SLX4IP	stable	128710
0.257472	5.01545	8.61942	3.34212e-16	6.43997e-15	26.0308	7972336	DZIP1	stable	22873
0.497357	9.12336	8.61354	3.48384e-16	6.70917e-15	25.9899	8111136	RETREG1	up	54463
0.709856	6.06369	8.61165	3.5306e-16	6.79527e-15	25.9768	8094778	UCHL1	up	7345
-0.201652	7.52079	-8.611	3.54691e-16	6.82272e-15	25.9722	8148358	PHF20L1	stable	51105
0.178747	8.04346	8.61009	3.56978e-16	6.8588e-15	25.9659	7917103	ZZZ3	stable	26009
0.352673	6.38677	8.60827	3.61578e-16	6.94317e-15	25.9533	8131631	HDAC9	stable	9734
0.201901	6.77333	8.6078	3.62789e-16	6.96241e-15	25.95	8095760	THAP6	stable	152815
-0.313609	6.22935	-8.60751	3.63535e-16	6.9727e-15	25.948	7978132	IPO4	stable	79711
-0.306773	7.97739	-8.60548	3.68775e-16	7.06914e-15	25.9339	8160016	RANBP6	stable	26953
-0.274656	6.24795	-8.60408	3.72422e-16	7.13308e-15	25.9242	8006562	RASL10B	stable	91608
0.156978	10.2696	8.60404	3.72539e-16	7.13308e-15	25.9239	7945182	APLP2	stable	334
-0.248831	4.95927	-8.60252	3.76553e-16	7.20166e-15	25.9134	8128099	GABRR2	stable	2570
-0.300107	9.00208	-8.60238	3.76934e-16	7.2048e-15	25.9124	8064939	TMX4	stable	56255
-0.199769	6.71228	-8.6015	3.7927e-16	7.2453e-15	25.9063	7960088	FBRSL1	stable	57666
-0.381116	6.99155	-8.5991	3.85755e-16	7.36495e-15	25.8896	8078729	MYD88	stable	4615
-0.250818	6.45609	-8.5985	3.87386e-16	7.39185e-15	25.8855	7941236	CDC42EP2	stable	10435
0.53096	8.54031	8.59419	3.9933e-16	7.61541e-15	25.8556	8056518	SCN7A	up	6332
-0.221306	6.44154	-8.58793	4.17372e-16	7.95036e-15	25.8121	7906469	DUSP23	stable	54935
-0.17158	8.01787	-8.58403	4.28993e-16	8.16705e-15	25.7851	8160722	UBAP2	stable	55833
-0.174501	5.55734	-8.57818	4.47035e-16	8.50082e-15	25.7446	7942168	FADD	stable	8772
-0.21143	5.81208	-8.57605	4.53805e-16	8.62462e-15	25.7298	8165622	ZMYND19	stable	116225
0.176956	7.54008	8.57533	4.56095e-16	8.6632e-15	25.7248	8151842	VIRMA	stable	25962
-0.173814	6.37915	-8.57273	4.64533e-16	8.81845e-15	25.7068	8035737	ATP13A1	stable	57130
0.227749	5.66543	8.57263	4.6484e-16	8.81924e-15	25.7061	8001337	ZNF423	stable	23090
-0.315069	4.96531	-8.57065	4.71391e-16	8.93844e-15	25.6924	7910416	URB2	stable	9816
0.483129	8.76371	8.56884	4.77414e-16	9.04213e-15	25.6799	8097692	EDNRA	up	1909
0.215414	6.23639	8.56876	4.77674e-16	9.04213e-15	25.6793	7963261	PHBP19	stable	494150
-0.206335	8.6483	-8.56867	4.77981e-16	9.04279e-15	25.6787	7967486	CCDC92	stable	80212
0.25882	6.16714	8.56183	5.0156e-16	9.47812e-15	25.6313	7924092	SLC30A1	stable	7779
-0.304063	5.79611	-8.56006	5.07862e-16	9.59176e-15	25.6191	8059565	PID1	stable	55022
-0.461521	8.4624	-8.55621	5.21785e-16	9.84356e-15	25.5924	8041048	FOSL2	down	2355
-0.234222	6.15104	-8.55604	5.22398e-16	9.84954e-15	25.5913	7906128	SLC25A44	stable	9673
-0.236073	5.49666	-8.5428	5.73347e-16	1.0804e-14	25.4997	8121418	SMPD2	stable	6610
0.181299	7.31101	8.54134	5.79286e-16	1.09098e-14	25.4896	7950864	ME3	stable	10873
-0.563182	6.365	-8.54125	5.79633e-16	1.09101e-14	25.489	8119088	CDKN1A	down	1026
-0.213456	7.81221	-8.53919	5.88094e-16	1.10631e-14	25.4748	8158725	ABL1	stable	25
0.297107	9.21226	8.53625	6.00364e-16	1.12749e-14	25.4544	8140579	CACNA2D1	stable	781
0.26146	4.88912	8.53517	6.04937e-16	1.13543e-14	25.447	7975676	BBOF1	stable	80127
-0.377563	6.69892	-8.53273	6.15378e-16	1.15373e-14	25.4301	7978595	BAZ1A	stable	11177
0.252507	5.76172	8.53232	6.1715e-16	1.1564e-14	25.4273	8031650	ZNF471	stable	57573
-0.244972	6.44224	-8.53171	6.198e-16	1.16071e-14	25.4231	8025877	PLPPR2	stable	64748
0.384007	6.6869	8.53117	6.22137e-16	1.16444e-14	25.4194	7942135	ANO1	stable	55107
0.159384	7.37742	8.53037	6.25673e-16	1.17039e-14	25.4138	7957043	FRS2	stable	10818
-0.259612	7.1554	-8.53003	6.27173e-16	1.17254e-14	25.4115	8061542	HM13	stable	81502
0.344828	4.97215	8.52471	6.51019e-16	1.21644e-14	25.3748	8150901	PENK	stable	5179
-0.315989	7.88101	-8.52415	6.53556e-16	1.2205e-14	25.3709	8115261	CCDC69	stable	26112
-0.344876	6.73466	-8.52356	6.56291e-16	1.22492e-14	25.3668	7967202	RHOF	stable	54509
-0.222176	7.45667	-8.52194	6.638e-16	1.23824e-14	25.3556	7933164	HNRNPF	stable	3185
-0.173419	9.02391	-8.51589	6.92573e-16	1.28974e-14	25.3139	8140061	BCL7B	stable	9275
0.223573	5.96164	8.51412	7.012e-16	1.30508e-14	25.3017	8121349	AFG1L	stable	246269
-0.158992	8.60087	-8.50832	7.30317e-16	1.35851e-14	25.2617	8052925	TEX261	stable	113419
-0.265711	7.84004	-8.5071	7.36608e-16	1.36945e-14	25.2532	8097570	USP38	stable	84640
0.255527	5.74975	8.5067	7.38638e-16	1.37224e-14	25.2505	8146357	MCM4	stable	4173
-0.20198	6.85965	-8.50665	7.38932e-16	1.37224e-14	25.2501	7914617	AK2	stable	204
0.172827	7.84561	8.49527	8.00239e-16	1.48361e-14	25.1717	8100714	YTHDC1	stable	91746
0.179441	3.54905	8.49418	8.06381e-16	1.49416e-14	25.1642	7982392	RYR3	stable	6263
0.349202	6.90929	8.4923	8.17058e-16	1.5131e-14	25.1513	8113773	ALDH7A1	stable	501
-0.214044	6.73816	-8.48795	8.42278e-16	1.55894e-14	25.1214	7980358	POMT2	stable	29954
0.131214	9.16647	8.48697	8.4812e-16	1.56888e-14	25.1146	7995421	LONP2	stable	83752
-0.397002	4.28942	-8.48305	8.71682e-16	1.61157e-14	25.0876	8038824	SIGLEC10	down	89790
0.45971	5.10534	8.4816	8.8056e-16	1.62618e-14	25.0777	7952022	JAML	up	120425
-0.228586	6.22764	-8.47768	9.05022e-16	1.6695e-14	25.0507	8070129	DONSON	stable	29980
-0.291226	7.82499	-8.47627	9.13995e-16	1.68512e-14	25.041	8142307	PNPLA8	stable	50640
0.312021	5.3351	8.47602	9.15606e-16	1.68716e-14	25.0393	7942520	LOC100287896	stable	100287896
-0.738597	7.14518	-8.47358	9.31367e-16	1.71525e-14	25.0225	8077490	LMCD1	down	29995
-0.249746	6.74703	-8.47342	9.32414e-16	1.71623e-14	25.0214	8032491	LMNB2	stable	84823
0.322066	5.9499	8.46876	9.63265e-16	1.77203e-14	24.9894	8065719	PXMP4	stable	11264
-0.190259	7.57116	-8.46841	9.65673e-16	1.77548e-14	24.9869	8167322	WDR13	stable	64743
-0.174865	9.30148	-8.46674	9.76997e-16	1.79531e-14	24.9754	8011077	PITPNA	stable	5306
0.436766	5.84957	8.4658	9.83453e-16	1.80618e-14	24.969	8175609	LINC00893	up	100131434
0.211857	6.83642	8.46511	9.88154e-16	1.81381e-14	24.9643	8077370	SETMAR	stable	6419
0.610688	6.51801	8.46018	1.02279e-15	1.87533e-14	24.9304	7932082	CCDC3	up	83643
-0.191027	7.38777	-8.45891	1.0319e-15	1.89099e-14	24.9217	8040698	SLC35F6	stable	54978
-0.293277	6.27556	-8.45665	1.04831e-15	1.92e-14	24.9061	7900911	DPH2	stable	1802
-0.289779	4.69172	-8.45654	1.04916e-15	1.9205e-14	24.9053	8025255	STXBP2	stable	6813
0.554697	5.52996	8.45626	1.0512e-15	1.92318e-14	24.9034	7925846	IDI2-AS1	up	55853
0.409885	6.11116	8.44644	1.1258e-15	2.05739e-14	24.836	7958913	OAS2	up	4939
-0.24269	6.05527	-8.44604	1.12892e-15	2.06197e-14	24.8333	7946149	APBB1	stable	322
-0.668039	4.15835	-8.44594	1.12969e-15	2.06224e-14	24.8326	8120335	FAM83B	down	222584
0.267584	4.60537	8.44411	1.14424e-15	2.08766e-14	24.82	7993624	SYT17	stable	51760
0.300028	6.92068	8.44396	1.14542e-15	2.08866e-14	24.819	7942964	TMEM135	stable	65084
0.275817	5.03171	8.4418	1.16284e-15	2.11812e-14	24.8042	7943442	DYNC2H1	stable	79659
0.404727	6.1866	8.44089	1.1702e-15	2.13036e-14	24.798	7927681	BICC1	up	80114
-0.358671	6.16336	-8.43757	1.19764e-15	2.17911e-14	24.7752	8131179	TTYH3	stable	80727
-0.439305	7.88631	-8.43648	1.20673e-15	2.19445e-14	24.7677	8029784	HIF3A	down	64344
0.194945	4.06392	8.43522	1.21744e-15	2.21273e-14	24.759	7906642	KLHDC9	stable	126823
0.164768	5.99894	8.43358	1.23139e-15	2.23686e-14	24.7478	8119670	KLC4	stable	89953
-0.19269	4.74351	-8.43132	1.25095e-15	2.27114e-14	24.7323	8032670	APBA3	stable	9546
0.269847	5.48595	8.42856	1.27524e-15	2.31399e-14	24.7134	8122327	CCDC28A	stable	25901
-0.160732	6.91513	-8.42694	1.28975e-15	2.33815e-14	24.7023	8011774	CAMTA2	stable	23125
-0.738249	5.06908	-8.42692	1.28996e-15	2.33815e-14	24.7021	7975268	ARG2	down	384
-0.288473	9.36893	-8.42452	1.31172e-15	2.37629e-14	24.6857	8135955	CALU	stable	813
-0.223765	5.77534	-8.42153	1.3393e-15	2.42495e-14	24.6652	7918869	NGF	stable	4803
0.229442	8.34276	8.42109	1.3434e-15	2.43105e-14	24.6622	8016159	DCAKD	stable	79877
-0.210292	8.93012	-8.41989	1.35466e-15	2.45008e-14	24.654	7979204	FERMT2	stable	10979
-0.333537	7.28913	-8.41965	1.35693e-15	2.45286e-14	24.6524	7950235	STARD10	stable	10809
-0.311404	6.27977	-8.41706	1.38161e-15	2.49613e-14	24.6346	7932069	NUDT5	stable	11164
-0.379975	6.3637	-8.41637	1.38828e-15	2.50682e-14	24.6299	8080487	PRKCD	stable	5580
-0.188883	6.42739	-8.41541	1.39759e-15	2.52225e-14	24.6233	7967841	CHFR	stable	55743
-0.189815	6.72269	-8.41521	1.39954e-15	2.52441e-14	24.6219	8037847	AP2S1	stable	1175
-0.27456	5.9287	-8.4149	1.40254e-15	2.52845e-14	24.6198	7940349	CCDC86	stable	79080
-0.408186	7.36282	-8.41237	1.4275e-15	2.57204e-14	24.6025	8123598	SERPINB1	down	1992
-0.164183	6.08145	-8.40812	1.47033e-15	2.64778e-14	24.5734	7941350	PCNX3	stable	399909
-0.214673	7.33972	-8.40726	1.47914e-15	2.66221e-14	24.5675	8032410	MOB3A	stable	126308
-0.200656	5.41729	-8.40477	1.50499e-15	2.70728e-14	24.5505	8066953	SPATA2	stable	9825
0.446879	8.35485	8.40385	1.51473e-15	2.72332e-14	24.5442	8017885	ABCA8	up	10351
0.260309	5.26278	8.39937	1.56265e-15	2.80796e-14	24.5135	7943919	TTC12	stable	54970
0.196177	8.44529	8.39485	1.61249e-15	2.8944e-14	24.4827	8019877	SMCHD1	stable	23347
0.338618	6.88146	8.3946	1.6153e-15	2.89788e-14	24.481	8042468	ANXA4	stable	307
-0.328609	5.53144	-8.39117	1.65435e-15	2.96634e-14	24.4575	8072705	RASD2	stable	23551
-0.643083	5.55766	-8.39072	1.65946e-15	2.9739e-14	24.4544	8077270	CHL1	down	10752
-0.194257	8.14611	-8.39029	1.66441e-15	2.98116e-14	24.4515	7903988	RAP1A	stable	5906
0.348493	5.47413	8.38884	1.68125e-15	3.00809e-14	24.4416	8038809	NKG7	stable	4818
0.455766	6.36979	8.38513	1.72517e-15	3.08502e-14	24.4162	7933733	FAM13C	up	220965
-0.297076	4.50763	-8.38328	1.74757e-15	3.12159e-14	24.4036	8033233	TUBB4A	stable	10382
0.177727	7.1237	8.38321	1.74843e-15	3.12159e-14	24.4031	8170326	FMR1	stable	2332
0.243908	6.57197	8.38052	1.78131e-15	3.17857e-14	24.3848	8073022	CBY1	stable	25776
-0.155095	8.19112	-8.3762	1.83563e-15	3.272e-14	24.3552	7987048	MTMR10	stable	54893
-0.208107	5.05577	-8.37461	1.85603e-15	3.30658e-14	24.3443	8149612	LZTS1	stable	11178
-0.198953	9.47181	-8.3744	1.85865e-15	3.3095e-14	24.343	7938544	TEAD1	stable	7003
0.176285	3.75221	8.3715	1.89642e-15	3.37314e-14	24.3232	8092358	MCF2L2	stable	23101
-0.197567	7.46836	-8.37115	1.90108e-15	3.37962e-14	24.3208	8172876	SMC1A	stable	8243
0.184396	7.98676	8.37047	1.91014e-15	3.39391e-14	24.3161	8094974	OCIAD1	stable	54940
-0.375	7.37076	-8.36686	1.95848e-15	3.47795e-14	24.2915	8000028	DCUN1D3	stable	123879
-0.190974	5.43986	-8.3666	1.96201e-15	3.48236e-14	24.2897	8066091	SOGA1	stable	140710
0.348963	4.37503	8.36505	1.98327e-15	3.51822e-14	24.2791	8019964	ARHGAP28	stable	79822
-0.175717	8.21619	-8.36481	1.98658e-15	3.52222e-14	24.2775	7897890	VPS13D	stable	55187
0.25427	6.43434	8.3601	2.05255e-15	3.63531e-14	24.2454	8071981	KIAA1671	stable	85379
-0.286338	8.31405	-8.35936	2.06308e-15	3.65201e-14	24.2403	8024019	PTBP1	stable	5725
0.180158	6.30868	8.35579	2.11483e-15	3.74163e-14	24.216	8003733	SGSM2	stable	9905
0.226665	6.81262	8.34872	2.22096e-15	3.92731e-14	24.1678	8150565	RNF170	stable	81790
0.384306	3.63631	8.34549	2.27125e-15	4.01411e-14	24.1458	7978343	CMA1	stable	1215
-0.721936	5.18271	-8.34333	2.30549e-15	4.07245e-14	24.1311	8102249	ETNPPL	down	64850
-0.262441	9.23972	-8.3432	2.30763e-15	4.07407e-14	24.1302	8008113	CALCOCO2	stable	10241
0.200889	7.29849	8.33967	2.36471e-15	4.17264e-14	24.1062	8027368	ZNF254	stable	9534
0.229279	5.54406	8.33666	2.41449e-15	4.25822e-14	24.0857	8123467	ERMARD	stable	55780
-0.180109	8.66054	-8.3358	2.42898e-15	4.2815e-14	24.0798	8011832	NUP88	stable	4927
0.887124	5.72153	8.32489	2.6194e-15	4.61025e-14	24.0056	8057771	STAT4	up	6775
-0.363999	7.80405	-8.32395	2.63653e-15	4.63754e-14	23.9992	7908758	SHISA4	stable	149345
0.586867	5.99604	8.32032	2.70343e-15	4.7502e-14	23.9746	7948167	APLNR	up	187
0.213784	5.76449	8.31767	2.75346e-15	4.83555e-14	23.9565	7946245	DCHS1	stable	8642
-0.177946	7.75205	-8.31751	2.75659e-15	4.83849e-14	23.9554	8067382	PSMA7	stable	5688
-0.304579	6.80154	-8.31561	2.79298e-15	4.89978e-14	23.9425	8146685	RRS1	stable	23212
0.185054	7.36739	8.31342	2.83564e-15	4.97201e-14	23.9276	8033780	ZNF426	stable	79088
-0.311423	5.82201	-8.31182	2.8671e-15	5.02188e-14	23.9168	8137280	NOS3	stable	4846
-0.215724	7.53186	-8.30813	2.9411e-15	5.14878e-14	23.8917	8027018	KXD1	stable	79036
0.358488	5.19796	8.30643	2.97596e-15	5.20707e-14	23.8801	8145555	SCARA3	stable	51435
-0.206919	5.54495	-8.3026	3.0556e-15	5.34362e-14	23.8542	8164496	KYAT1	stable	883
0.316166	9.60258	8.30073	3.09524e-15	5.41009e-14	23.8415	8161747	ZFAND5	stable	7763
0.211841	9.18016	8.30022	3.10619e-15	5.42639e-14	23.838	8051928	PREPL	stable	9581
0.225937	8.63009	8.2985	3.14331e-15	5.48546e-14	23.8263	7954613	CCDC91	stable	55297
-0.191162	6.38327	-8.29719	3.17186e-15	5.53239e-14	23.8175	7914648	PHC2	stable	1912
0.762286	7.05899	8.29703	3.17537e-15	5.53562e-14	23.8164	7964846	LRRC10	up	376132
-0.377428	5.86982	-8.29273	3.27117e-15	5.69428e-14	23.7871	7978376	STXBP6	stable	29091
-0.21534	6.76183	-8.29271	3.27151e-15	5.69428e-14	23.787	8143065	CYREN	stable	78996
0.206136	5.11193	8.2917	3.29431e-15	5.73096e-14	23.7802	8052418	PUS10	stable	150962
-0.214536	5.42832	-8.29111	3.30784e-15	5.74849e-14	23.7762	8032009	MIER2	stable	54531
-0.469975	6.2807	-8.29076	3.31586e-15	5.75942e-14	23.7738	7930872	NANOS1	down	340719
-0.319723	6.12727	-8.2878	3.38412e-15	5.87493e-14	23.7538	8143247	KIAA1549	stable	57670
-0.238857	6.77783	-8.28395	3.47541e-15	6.03026e-14	23.7276	8166219	SYAP1	stable	94056
0.390901	5.97488	8.28386	3.47752e-15	6.03078e-14	23.727	8116818	BMP6	stable	654
0.234075	3.45851	8.28248	3.51073e-15	6.08521e-14	23.7177	8078663	MIR26A1	stable	407015
0.434921	5.97224	8.28025	3.56512e-15	6.17627e-14	23.7026	7938629	PDE3B	up	5140
0.348558	4.24662	8.27672	3.65296e-15	6.31857e-14	23.6786	7951397	CASP1	stable	834
-0.290596	7.76822	-8.2764	3.66106e-15	6.3293e-14	23.6765	7953100	FKBP4	stable	2288
-0.261482	7.7761	-8.27539	3.68663e-15	6.3702e-14	23.6696	8076128	JOSD1	stable	9929
-0.313536	6.00232	-8.27488	3.69943e-15	6.389e-14	23.6662	8164013	STRBP	stable	55342
-0.149599	6.43339	-8.27129	3.79206e-15	6.54557e-14	23.6419	7994858	PRR14	stable	78994
-0.170756	4.89539	-8.27025	3.81948e-15	6.58949e-14	23.6348	8172460	SLC35A2	stable	7355
-0.143933	6.70843	-8.2693	3.84457e-15	6.62935e-14	23.6284	7996720	PSKH1	stable	5681
-0.209914	6.00829	-8.26911	3.8496e-15	6.63458e-14	23.6271	8093624	SH3BP2	stable	6452
-0.403745	5.06332	-8.2683	3.87109e-15	6.66816e-14	23.6216	8064451	SIRPB2	down	284759
0.458112	4.01654	8.2681	3.87657e-15	6.67415e-14	23.6202	7952313	MIRLET7A2	up	406882
0.21557	8.29976	8.26603	3.93213e-15	6.76282e-14	23.6062	8131013	SUN1	stable	23353
-0.254123	7.18724	-8.26266	4.02441e-15	6.91439e-14	23.5834	8027169	GATAD2A	stable	54815
0.164147	9.6093	8.26187	4.04635e-15	6.94849e-14	23.5781	8154394	SNAPC3	stable	6619
0.227141	8.13771	8.25732	4.17514e-15	7.15857e-14	23.5473	8113157	TTC37	stable	9652
0.269917	5.08585	8.25585	4.21767e-15	7.22778e-14	23.5373	8029321	ZNF283	stable	284349
0.373062	7.63789	8.25546	4.22895e-15	7.24339e-14	23.5347	8105121	GHR	stable	2690
-0.220534	4.30347	-8.25501	4.24208e-15	7.26213e-14	23.5317	7984174	SNX22	stable	79856
0.155624	7.76994	8.25203	4.32989e-15	7.40485e-14	23.5115	8144239	FBXO25	stable	26260
0.3969	4.23764	8.25185	4.33513e-15	7.41e-14	23.5103	8145736	NRG1	up	3084
0.191843	5.43338	8.25075	4.36819e-15	7.46267e-14	23.5029	7926936	CCDC7	stable	79741
-0.494478	7.74204	-8.25067	4.37067e-15	7.46309e-14	23.5023	8023710	CDH19	down	28513
0.430246	4.81155	8.24997	4.39173e-15	7.49136e-14	23.4976	8135544	FOXP2	up	93986
-0.21479	6.60395	-8.2492	4.41503e-15	7.52726e-14	23.4924	8131427	C7orf26	stable	79034
-0.208903	7.04443	-8.24837	4.44014e-15	7.5662e-14	23.4868	8123463	C6orf120	stable	387263
0.303366	8.04624	8.24478	4.55128e-15	7.75162e-14	23.4625	8101844	ADH5	stable	128
0.194691	6.5486	8.24245	4.62477e-15	7.87275e-14	23.4468	8167897	RRAGB	stable	10325
-0.170774	9.2199	-8.23571	4.84416e-15	8.24201e-14	23.4012	7978718	SEC23A	stable	10484
-0.45155	5.56004	-8.23306	4.93317e-15	8.38916e-14	23.3833	7983630	FGF7	down	2252
-0.215503	7.60594	-8.23253	4.95085e-15	8.41492e-14	23.3798	8013788	FLOT2	stable	2319
-0.232557	8.94068	-8.23144	4.98811e-15	8.47393e-14	23.3724	8142981	PODXL	stable	5420
-0.268683	6.87054	-8.2306	5.01716e-15	8.51894e-14	23.3667	7938331	ZNF143	stable	7702
0.309622	7.71188	8.22651	5.16011e-15	8.75274e-14	23.3391	7991602	PCSK6	stable	5046
0.523531	3.41292	8.22385	5.2551e-15	8.90933e-14	23.3212	7968866	FAM216B	up	144809
-0.261463	6.72335	-8.22024	5.38685e-15	9.1234e-14	23.2968	7936100	CALHM2	stable	51063
0.279622	5.01414	8.21538	5.56958e-15	9.42328e-14	23.264	8074845	ZNF280B	stable	140883
0.391065	5.29493	8.2132	5.65363e-15	9.56064e-14	23.2493	8040712	CENPA	stable	1058
-0.190868	9.00339	-8.21163	5.71464e-15	9.6589e-14	23.2388	8007397	PSME3	stable	10197
-0.601471	7.67756	-8.21085	5.7455e-15	9.70614e-14	23.2335	7898799	C1QC	down	714
0.386775	5.8972	8.21009	5.77561e-15	9.75206e-14	23.2283	8140752	ABCB4	stable	5244
-0.352802	7.40168	-8.20859	5.83504e-15	9.84741e-14	23.2183	8024228	MIDN	stable	90007
-0.218454	5.31193	-8.20768	5.87182e-15	9.90445e-14	23.2121	8065510	NANP	stable	140838
-0.393691	7.55193	-8.20727	5.88817e-15	9.927e-14	23.2094	8152215	KLF10	stable	7071
-0.219075	7.07213	-8.20576	5.94966e-15	1.00256e-13	23.1992	7947815	ACP2	stable	53
0.197831	9.15148	8.2049	5.98454e-15	1.00793e-13	23.1934	8160088	MPDZ	stable	8777
-0.339146	4.82365	-8.20261	6.07942e-15	1.02339e-13	23.178	8062844	TTPAL	stable	79183
-0.393555	5.60434	-8.20153	6.12439e-15	1.03044e-13	23.1707	7939492	C11orf96	stable	387763
0.312185	4.9876	8.19836	6.25893e-15	1.05201e-13	23.1494	8040458	KCNS3	stable	3790
-0.22245	5.61298	-8.19614	6.35491e-15	1.06717e-13	23.1344	7940698	TAF6L	stable	10629
-0.225314	5.45342	-8.18748	6.74314e-15	1.13111e-13	23.0761	7993296	SHISA9	stable	729993
-0.159889	8.17256	-8.18668	6.78033e-15	1.13678e-13	23.0707	8108163	C5orf24	stable	134553
0.681951	7.44617	8.17989	7.10252e-15	1.1896e-13	23.0251	8057486	PDE1A	up	5136
0.159541	4.75849	8.17922	7.13536e-15	1.19391e-13	23.0206	7986757	NDN	stable	4692
-0.19885	7.42867	-8.17922	7.13542e-15	1.19391e-13	23.0205	8026315	PKN1	stable	5585
-0.261729	6.09217	-8.17503	7.34284e-15	1.228e-13	22.9924	8032365	KLF16	stable	83855
-0.320598	6.1992	-8.16783	7.71354e-15	1.28935e-13	22.944	8139680	COBL	stable	23242
0.21215	4.32195	8.16773	7.71846e-15	1.28952e-13	22.9434	7925089	PCNX2	stable	80003
0.176054	6.9985	8.16236	8.00704e-15	1.33572e-13	22.9073	8002087	RANBP10	stable	57610
0.178812	8.61555	8.16117	8.07286e-15	1.34603e-13	22.8992	7920000	POGZ	stable	23126
0.634365	8.90606	8.15727	8.29041e-15	1.38023e-13	22.8731	8089544	CCDC80	up	151887
0.222317	6.37378	8.15166	8.61448e-15	1.43347e-13	22.8354	7905198	TARS2	stable	80222
0.290961	6.52755	8.14763	8.8549e-15	1.472e-13	22.8084	8099541	QDPR	stable	5860
-0.564635	6.67233	-8.14672	8.9097e-15	1.48037e-13	22.8023	7979663	RAB15	down	376267
0.242521	5.38216	8.14534	8.99404e-15	1.49364e-13	22.7931	7896822	AGRN	stable	375790
0.3139	4.46276	8.14397	9.07875e-15	1.50695e-13	22.7838	8127180	HMGCLL1	stable	54511
-0.230599	5.84677	-8.14389	9.08336e-15	1.50697e-13	22.7833	8059071	NHEJ1	stable	79840
-0.20234	7.92979	-8.14312	9.13139e-15	1.51418e-13	22.7782	8164883	SURF4	stable	6836
-0.220119	4.8617	-8.14248	9.17127e-15	1.51928e-13	22.7739	8053036	TPRKB	stable	51002
0.232205	4.45507	8.14211	9.19449e-15	1.52237e-13	22.7714	8163444	ZFP37	stable	7539
0.177742	7.56994	8.1402	9.31519e-15	1.54082e-13	22.7586	8099570	DCAF16	stable	54876
-0.183513	7.27919	-8.13493	9.65615e-15	1.59564e-13	22.7233	7978166	TM9SF1	stable	10548
-0.202122	7.24544	-8.13373	9.7354e-15	1.60793e-13	22.7152	7932512	DNAJC1	stable	64215
-0.245367	5.24649	-8.13242	9.82253e-15	1.62072e-13	22.7065	7992967	VASN	stable	114990
0.329924	5.33037	8.13214	9.84154e-15	1.62305e-13	22.7046	8125545	HLA-DOA	stable	3111
0.373181	5.5504	8.12983	9.99794e-15	1.64803e-13	22.6891	8167973	HEPH	stable	9843
0.212643	8.7667	8.12966	1.0009e-14	1.64904e-13	22.688	8086842	MAP4	stable	4134
0.270722	5.80744	8.12906	1.005e-14	1.65498e-13	22.684	7907370	DNM3	stable	26052
0.237057	11.0424	8.12744	1.01615e-14	1.67251e-13	22.6731	8146216	VDAC3	stable	7419
-0.198056	6.83437	-8.12733	1.01693e-14	1.67295e-13	22.6724	8110224	TSPAN17	stable	26262
-0.137807	9.41024	-8.12408	1.03974e-14	1.70965e-13	22.6506	8019211	NPLOC4	stable	55666
-0.384717	7.00401	-8.12379	1.04176e-14	1.71211e-13	22.6487	8080344	STAB1	stable	23166
0.392391	6.74934	8.12237	1.05192e-14	1.7271e-13	22.6391	7902227	GADD45A	stable	1647
-0.257392	7.21173	-8.12172	1.05654e-14	1.73384e-13	22.6348	8133818	PHTF2	stable	57157
0.435183	5.05503	8.11944	1.07309e-14	1.75927e-13	22.6196	8027431	ZNF536	up	9745
0.470742	7.98405	8.11747	1.08761e-14	1.7822e-13	22.6064	7914127	IFI6	up	2537
0.188209	6.44238	8.1132	1.11967e-14	1.83292e-13	22.5778	8059801	USP40	stable	55230
-0.188981	5.2913	-8.1087	1.15449e-14	1.88899e-13	22.5477	8000856	TBC1D10B	stable	26000
-0.309198	6.0324	-8.10249	1.20429e-14	1.96855e-13	22.5062	8066431	ADA	stable	100
-0.260021	6.28064	-8.09971	1.22734e-14	2.00524e-13	22.4876	7899096	ZNF593	stable	51042
0.203787	9.3049	8.09645	1.25482e-14	2.04913e-13	22.4658	7935968	LDB1	stable	8861
0.283084	4.85339	8.09619	1.25705e-14	2.05153e-13	22.4641	8157058	FSD1L	stable	83856
0.276815	7.63374	8.09613	1.25753e-14	2.05153e-13	22.4637	7923131	DENND1B	stable	163486
-0.230683	9.60266	-8.09474	1.26951e-14	2.07008e-13	22.4544	8011759	PFN1	stable	5216
0.201628	8.29339	8.09356	1.27972e-14	2.08569e-13	22.4465	7949674	RBM4B	stable	83759
-0.290453	6.67086	-8.09101	1.30211e-14	2.12115e-13	22.4295	8147206	RIPK2	stable	8767
-0.343704	4.46878	-8.08883	1.32149e-14	2.15166e-13	22.415	8044773	MARCO	stable	8685
0.271631	4.40789	8.08752	1.33336e-14	2.16887e-13	22.4062	8075886	IL2RB	stable	3560
-0.162582	6.27649	-8.08348	1.37045e-14	2.22595e-13	22.3792	7941797	GRK2	stable	156
0.398344	9.74861	8.08334	1.37175e-14	2.22697e-13	22.3783	8058857	IGFBP5	up	3488
0.242701	7.08183	8.08322	1.37282e-14	2.22762e-13	22.3776	7926170	DHTKD1	stable	55526
-0.1818	9.02586	-8.08294	1.37551e-14	2.23089e-13	22.3756	8070819	PTTG1IP	stable	754
0.22931	6.15437	8.08137	1.3902e-14	2.25363e-13	22.3652	8174228	TCEAL8	stable	90843
0.204487	5.52303	8.08074	1.39622e-14	2.26119e-13	22.3609	8021222	ELAC1	stable	55520
0.183696	8.3561	8.079	1.41282e-14	2.28695e-13	22.3493	8042207	COMMD1	stable	150684
-0.177464	6.42635	-8.07836	1.41888e-14	2.29565e-13	22.3451	8007250	NAGLU	stable	4669
0.233153	9.65517	8.07635	1.43843e-14	2.32614e-13	22.3317	8067017	DPM1	stable	8813
0.254263	6.35143	8.07241	1.47742e-14	2.38573e-13	22.3054	8069700	N6AMT1	stable	29104
-0.217284	4.18856	-8.07154	1.48616e-14	2.39867e-13	22.2996	8003656	SERPINF2	stable	5345
0.4997	4.83088	8.07052	1.49649e-14	2.41418e-13	22.2928	8140686	SEMA3D	up	223117
0.198002	6.48851	8.07006	1.50119e-14	2.42059e-13	22.2897	8061305	KIZ	stable	55857
-0.324841	6.23809	-8.06975	1.50431e-14	2.42445e-13	22.2877	7958200	EID3	stable	493861
0.200395	6.11427	8.06877	1.51434e-14	2.43942e-13	22.2812	7913814	SYF2	stable	25949
-0.251594	7.23576	-8.06837	1.51846e-14	2.44487e-13	22.2785	7920506	SHE	stable	126669
-0.114795	8.68658	-8.06676	1.53517e-14	2.47059e-13	22.2677	8029029	HNRNPUL1	stable	11100
0.292682	5.74843	8.06582	1.54492e-14	2.48507e-13	22.2615	7954810	LRRK2	stable	120892
0.243407	6.80631	8.06454	1.55837e-14	2.50431e-13	22.253	8121002	SMIM8	stable	57150
-0.1841	6.68965	-8.06218	1.58352e-14	2.54348e-13	22.2373	7931393	GLRX3	stable	10539
-0.324662	8.02731	-8.06085	1.59789e-14	2.56485e-13	22.2284	8143825	KCNH2	stable	3757
-0.200659	8.91381	-8.06048	1.6019e-14	2.56929e-13	22.2259	8054771	SLC35F5	stable	80255
0.257433	3.39513	8.05951	1.61246e-14	2.58499e-13	22.2195	7983828	TEX9	stable	374618
0.181575	8.24611	8.05503	1.66217e-14	2.66211e-13	22.1897	8145922	DDHD2	stable	23259
-0.289278	4.88948	-8.0543	1.67039e-14	2.67399e-13	22.1848	7917779	GCLM	stable	2730
0.216888	6.2069	8.05422	1.67135e-14	2.67424e-13	22.1842	8016789	MBTD1	stable	54799
-0.239913	6.98353	-8.05155	1.7019e-14	2.7205e-13	22.1665	7938816	ZDHHC13	stable	54503
0.126501	8.18838	8.05039	1.71533e-14	2.74067e-13	22.1587	7918725	TRIM33	stable	51592
0.192809	6.71813	8.0493	1.72804e-14	2.75963e-13	22.1515	8048175	SMARCAL1	stable	50485
0.228332	7.93557	8.04887	1.73308e-14	2.76637e-13	22.1486	8015685	EZH1	stable	2145
-0.157339	8.35009	-8.0475	1.74925e-14	2.79084e-13	22.1395	7959574	KMT5A	stable	387893
-0.187302	5.3916	-8.04654	1.76062e-14	2.80628e-13	22.1331	7973709	NFATC4	stable	4776
-0.333069	6.85303	-8.04434	1.78701e-14	2.84699e-13	22.1185	8157264	SLC31A2	stable	1318
-0.22802	4.58601	-8.04333	1.79926e-14	2.86376e-13	22.1118	7897416	SLC45A1	stable	50651
0.206461	5.28945	8.0428	1.80572e-14	2.87267e-13	22.1083	7970892	N4BP2L1	stable	90634
-0.212103	5.17424	-8.04154	1.82118e-14	2.89588e-13	22.0999	8130374	FBXO5	stable	26271
-0.361277	5.81568	-8.03945	1.84722e-14	2.93588e-13	22.086	7990545	CSPG4	stable	1464
0.284765	7.45234	8.03651	1.88432e-14	2.99342e-13	22.0664	8035793	ZNF737	stable	100129842
-0.171083	5.4194	-8.0351	1.90236e-14	3.02064e-13	22.0571	8029744	QPCTL	stable	54814
-0.188743	6.25514	-8.03469	1.90767e-14	3.02762e-13	22.0543	8169882	BCORL1	stable	63035
-0.351595	8.21713	-8.03291	1.93074e-14	3.06278e-13	22.0425	8145365	DOCK5	stable	80005
0.38622	4.9354	8.03237	1.9378e-14	3.07253e-13	22.0389	7902965	BTBD8	stable	284697
-0.629746	7.62798	-8.02901	1.98237e-14	3.1387e-13	22.0166	7926410	MRC1	down	4360
-0.198187	8.64662	-8.02758	2.00163e-14	3.1677e-13	22.0071	8070269	VPS26C	stable	10311
0.237341	5.92661	8.02723	2.00639e-14	3.17371e-13	22.0048	8014916	ORMDL3	stable	94103
-0.167548	6.11064	-8.02342	2.05875e-14	3.25499e-13	21.9795	7994874	FBRS	stable	64319
-0.469318	7.48188	-8.02261	2.07009e-14	3.27137e-13	21.9741	8090343	KLF15	down	28999
-0.16877	5.88382	-8.02194	2.07938e-14	3.28397e-13	21.9697	8008096	SNX11	stable	29916
0.534335	7.17362	8.01965	2.11182e-14	3.32937e-13	21.9545	7897378	PER3	up	8863
-0.283167	11.8397	-8.01959	2.11279e-14	3.32937e-13	21.954	8137979	ACTB	stable	60
0.328597	7.0189	8.0183	2.13127e-14	3.3569e-13	21.9455	8043657	CNNM4	stable	26504
-0.15062	8.23918	-8.01774	2.13936e-14	3.36805e-13	21.9417	7998774	RNPS1	stable	10921
0.299954	5.798	8.01516	2.17693e-14	3.42396e-13	21.9246	8121009	C6orf163	stable	206412
0.527674	8.04824	8.01412	2.19228e-14	3.44648e-13	21.9177	8097373	ABHD18	up	80167
0.164905	7.45032	8.01309	2.20762e-14	3.46731e-13	21.9109	8152111	ZNF706	stable	51123
0.333077	8.24976	8.01017	2.25156e-14	3.53466e-13	21.8915	7968577	NBEA	stable	26960
-0.217544	7.28124	-8.0093	2.26477e-14	3.55373e-13	21.8858	8129974	FUCA2	stable	2519
-0.155985	6.27869	-8.0075	2.29256e-14	3.59564e-13	21.8738	7973584	RNF31	stable	55072
0.162914	5.2574	8.00711	2.29859e-14	3.6034e-13	21.8712	7914361	COL16A1	stable	1307
-0.193059	6.91629	-8.00563	2.32155e-14	3.63597e-13	21.8615	8148737	MAF1	stable	84232
0.63965	7.42412	8.00051	2.40332e-14	3.76226e-13	21.8275	7975076	HSPA2	up	3306
-0.773304	5.46771	-8.00025	2.40743e-14	3.76693e-13	21.8258	8152617	HAS2	down	3037
-0.285164	7.44843	-7.99155	2.55306e-14	3.99292e-13	21.7681	8015460	ACLY	stable	47
0.254431	5.75254	7.99138	2.55595e-14	3.99557e-13	21.767	8075126	MN1	stable	4330
0.261593	5.3331	7.98977	2.58385e-14	4.03539e-13	21.7563	7940160	DTX4	stable	23220
0.234645	3.26227	7.98664	2.63885e-14	4.11935e-13	21.7356	7940226	MS4A2	stable	2206
0.482786	7.39318	7.97889	2.78044e-14	4.33429e-13	21.6843	8127563	COL12A1	up	1303
0.21005	9.41191	7.97856	2.78648e-14	4.34167e-13	21.6822	8043251	PTCD3	stable	55037
-0.202902	7.62039	-7.97844	2.7889e-14	4.3434e-13	21.6813	8034299	ELOF1	stable	84337
0.217807	6.82514	7.97636	2.82816e-14	4.40249e-13	21.6676	8102912	TBC1D9	stable	23158
0.173473	5.16669	7.97341	2.8848e-14	4.48646e-13	21.6481	8169015	TCEAL7	stable	56849
0.287887	6.01159	7.97202	2.9121e-14	4.52681e-13	21.6389	8102713	NUDT6	stable	11162
0.222243	5.6363	7.97112	2.92963e-14	4.55193e-13	21.633	8049969	SH3YL1	stable	26751
0.110998	8.97786	7.97003	2.95129e-14	4.58345e-13	21.6257	8056909	ATF2	stable	1386
-0.44873	7.13822	-7.96816	2.98869e-14	4.63936e-13	21.6134	8043197	VAMP8	down	8673
-0.231601	6.08315	-7.96754	3.00114e-14	4.65652e-13	21.6093	7979416	TIMM9	stable	26520
0.300114	6.92117	7.96716	3.00876e-14	4.66617e-13	21.6068	8054281	LONRF2	stable	164832
-0.294568	6.49316	-7.96486	3.05571e-14	4.73678e-13	21.5916	8076497	A4GALT	stable	53947
0.208568	6.58044	7.96466	3.05992e-14	4.74109e-13	21.5902	8084128	TTC14	stable	151613
0.449234	4.21578	7.96203	3.11454e-14	4.819e-13	21.5729	8165808	XG	up	7499
-0.203866	6.28605	-7.9569	3.22393e-14	4.98593e-13	21.539	7943882	PTS	stable	5805
0.550303	7.91025	7.95271	3.31587e-14	5.12574e-13	21.5114	8061272	CFAP61	up	26074
-0.163901	11.2997	-7.9489	3.40194e-14	5.25555e-13	21.4862	7898988	CLIC4	stable	25932
-0.243499	5.69038	-7.94886	3.403e-14	5.25555e-13	21.4859	8074773	YDJC	stable	150223
-0.212719	5.84623	-7.94834	3.41482e-14	5.27137e-13	21.4825	7963280	SMAGP	stable	57228
-0.205274	5.57521	-7.94592	3.4709e-14	5.35049e-13	21.4665	7907537	CACYBP	stable	27101
-0.310928	10.1677	-7.94363	3.52448e-14	5.42807e-13	21.4514	8053890	STARD7	stable	56910
0.212916	4.81493	7.942	3.5633e-14	5.48531e-13	21.4407	8092009	LRRC34	stable	151827
-0.439386	11.288	-7.94175	3.56939e-14	5.49214e-13	21.439	8135990	FLNC	down	2318
-0.148368	7.39714	-7.93752	3.67225e-14	5.63738e-13	21.4111	8087634	TUSC2	stable	11334
-0.31988	7.40587	-7.93494	3.73628e-14	5.73304e-13	21.3941	8029006	AXL	stable	558
-0.173325	5.74481	-7.93326	3.77877e-14	5.79556e-13	21.383	8030321	ALDH16A1	stable	126133
-0.230805	5.8938	-7.93308	3.78325e-14	5.79976e-13	21.3819	8075406	PES1	stable	23481
0.25813	3.87887	7.9319	3.81352e-14	5.84347e-13	21.374	8084766	TP63	stable	8626
-0.252856	7.48402	-7.93089	3.83935e-14	5.88035e-13	21.3674	7948881	WDR74	stable	54663
0.427789	3.88555	7.93054	3.84842e-14	5.89153e-13	21.3651	8003814	ASPA	up	443
-0.193524	3.26406	-7.92183	4.07977e-14	6.23997e-13	21.3078	7945040	HYLS1	stable	219844
0.26679	3.87009	7.92106	4.10101e-14	6.26669e-13	21.3027	8109912	KCNIP1	stable	30820
-0.249676	5.99757	-7.91989	4.13323e-14	6.31303e-13	21.295	8032157	SBNO2	stable	22904
-0.240548	3.46369	-7.91843	4.17395e-14	6.36939e-13	21.2854	8105899	MARVELD2	stable	153562
-0.185234	8.42623	-7.91794	4.1878e-14	6.38759e-13	21.2821	7914180	SPCS2	stable	9789
0.202171	4.91132	7.91702	4.21366e-14	6.42116e-13	21.2761	8158930	SPACA9	stable	11092
0.286482	6.97889	7.91623	4.23599e-14	6.45222e-13	21.2709	8113796	C5orf63	stable	401207
-0.445726	5.2578	-7.91303	4.32767e-14	6.58886e-13	21.2499	8006445	CCL11	down	6356
0.15538	7.15994	7.91073	4.39491e-14	6.68818e-13	21.2347	8125638	RXRB	stable	6257
-0.318082	5.55498	-7.9102	4.41051e-14	6.70884e-13	21.2312	8013135	SREBF1	stable	6720
-0.19459	6.43093	-7.90995	4.41816e-14	6.71742e-13	21.2295	7977340	BTBD6	stable	90135
0.326144	4.22654	7.90963	4.42747e-14	6.72851e-13	21.2275	7906348	CD1C	stable	911
-0.271012	6.79806	-7.90842	4.46368e-14	6.77735e-13	21.2195	7951325	DCUN1D5	stable	84259
0.205032	7.08548	7.90766	4.48622e-14	6.80847e-13	21.2145	7899990	NCDN	stable	23154
-0.266536	7.30251	-7.90322	4.62177e-14	7.01098e-13	21.1853	7947744	LRP4	stable	4038
-0.249062	5.66775	-7.90188	4.66324e-14	7.07067e-13	21.1765	8054766	ACR	stable	49
0.198256	5.90205	7.90179	4.66611e-14	7.0718e-13	21.1759	8042402	APLF	stable	200558
-0.321821	7.98577	-7.89764	4.79762e-14	7.25911e-13	21.1486	8169580	IL13RA1	stable	3597
0.173157	8.25157	7.89762	4.79842e-14	7.25911e-13	21.1485	8001841	DYNC1LI2	stable	1783
0.273061	3.03667	7.89699	4.81839e-14	7.286e-13	21.1444	8082745	ACKR4	stable	51554
0.203704	3.80721	7.89334	4.9376e-14	7.4595e-13	21.1204	7971757	NEK5	stable	341676
0.260253	7.43605	7.89323	4.94123e-14	7.46159e-13	21.1197	7974214	KLHDC1	stable	122773
0.290666	6.92042	7.89198	4.9829e-14	7.52111e-13	21.1114	8039044	ZNF415	stable	55786
-0.286344	5.74093	-7.89103	5.01458e-14	7.5655e-13	21.1052	7966356	HVCN1	stable	84329
0.390876	8.89514	7.89045	5.03403e-14	7.5914e-13	21.1014	7908694	NAV1	stable	89796
0.141339	7.74247	7.88798	5.11789e-14	7.71436e-13	21.0852	8023133	PIAS2	stable	9063
0.526173	6.88125	7.88703	5.15064e-14	7.76023e-13	21.0789	8088491	CADPS	up	8618
-0.170537	6.2483	-7.88617	5.18008e-14	7.80104e-13	21.0733	8171539	RAI2	stable	10742
-0.192549	6.48339	-7.88397	5.25715e-14	7.90995e-13	21.0588	8002370	ST3GAL2	stable	6483
-0.235384	6.19227	-7.88068	5.37399e-14	8.0821e-13	21.0372	8159786	TUBBP5	stable	643224
0.206609	4.86429	7.87962	5.41223e-14	8.13594e-13	21.0303	8028254	ZNF793	stable	390927
-0.163646	6.11876	-7.87909	5.43125e-14	8.16084e-13	21.0268	8025328	EVI5L	stable	115704
-0.425999	5.13891	-7.87856	5.45044e-14	8.18599e-13	21.0234	8061668	HCK	down	3055
-0.407627	6.18668	-7.8758	5.55184e-14	8.33451e-13	21.0053	7979196	GNPNAT1	down	64841
-0.210691	9.07693	-7.87292	5.6598e-14	8.49276e-13	20.9864	8018482	WBP2	stable	23558
0.279701	7.76317	7.87117	5.72625e-14	8.5886e-13	20.9749	8057797	CAVIN2	stable	8436
-0.189651	6.40066	-7.86863	5.82436e-14	8.73182e-13	20.9582	8030158	BAX	stable	581
-0.200899	6.01411	-7.8669	5.89212e-14	8.82546e-13	20.9469	7995834	MT1IP	stable	644314
0.240267	7.80141	7.86595	5.9296e-14	8.8776e-13	20.9407	7955450	LETMD1	stable	25875
-0.199227	6.32576	-7.86576	5.93678e-14	8.88436e-13	20.9395	8017718	AXIN2	stable	8313
0.286578	7.36392	7.86507	5.96452e-14	8.92186e-13	20.9349	7961891	BHLHE41	stable	79365
0.175401	7.80573	7.86187	6.09332e-14	9.10629e-13	20.9139	7927389	MAPK8	stable	5599
0.173159	4.57286	7.8618	6.09602e-14	9.10629e-13	20.9135	8065580	DUSP15	stable	128853
0.145236	7.69175	7.86044	6.15136e-14	9.18484e-13	20.9046	8045619	EPC2	stable	26122
-0.250479	5.53908	-7.86014	6.16385e-14	9.19937e-13	20.9026	8062873	KCNK15	stable	60598
-0.192519	5.42234	-7.85948	6.19115e-14	9.23597e-13	20.8983	8024497	THOP1	stable	7064
-0.223751	7.68466	-7.85823	6.24307e-14	9.30925e-13	20.8901	8013120	PEMT	stable	10400
0.21609	5.88526	7.85728	6.28271e-14	9.36416e-13	20.8839	8097626	GUSBP5	stable	441046
-0.26726	6.83029	-7.85635	6.3218e-14	9.41821e-13	20.8778	7899153	SH3BGRL3	stable	83442
-0.199577	6.32249	-7.85613	6.33116e-14	9.42793e-13	20.8763	7911600	NADK	stable	65220
-0.2225	3.76299	-7.85507	6.376e-14	9.48623e-13	20.8694	8014812	STAC2	stable	342667
-0.167419	6.08189	-7.84997	6.59648e-14	9.80987e-13	20.836	7914103	AHDC1	stable	27245
0.168727	6.85305	7.84978	6.60501e-14	9.81818e-13	20.8348	8022996	EPG5	stable	57724
0.33713	6.48837	7.84954	6.61554e-14	9.82943e-13	20.8332	8074780	YPEL1	stable	29799
0.164742	8.02503	7.84916	6.63208e-14	9.84962e-13	20.8307	7989159	ZNF280D	stable	54816
-0.338831	6.58155	-7.84692	6.73195e-14	9.99349e-13	20.8161	8120719	CD109	stable	135228
-0.207444	4.58383	-7.84665	6.74423e-14	1.00072e-12	20.8143	7905909	EFNA4	stable	1945
0.331464	4.95681	7.8455	6.79588e-14	1.00794e-12	20.8068	8025978	ZNF763	stable	284390
0.216669	7.55566	7.84288	6.91558e-14	1.02478e-12	20.7897	8141728	IFT22	stable	64792
0.418062	9.64046	7.84228	6.94335e-14	1.02844e-12	20.7857	8115147	CD74	up	972
-0.238608	5.22239	-7.84139	6.98454e-14	1.03408e-12	20.7799	8070615	WDR4	stable	10785
0.219899	4.83332	7.83898	7.09782e-14	1.05038e-12	20.7641	8169294	COL4A5	stable	1287
-0.161927	8.57208	-7.8365	7.21609e-14	1.06741e-12	20.7479	8044133	NCK2	stable	8440
0.372856	5.90867	7.83474	7.30076e-14	1.07946e-12	20.7364	8048432	CYP27A1	stable	1593
-0.30083	8.2165	-7.8289	7.59043e-14	1.12029e-12	20.6983	8069668	CYYR1	stable	116159
0.366215	4.11936	7.82816	7.62765e-14	1.12529e-12	20.6935	8083360	MED12L	stable	116931
0.324727	5.87154	7.82671	7.70191e-14	1.13574e-12	20.6839	8102065	BDH2	stable	56898
0.255864	5.95182	7.82544	7.76691e-14	1.14482e-12	20.6757	7971218	KBTBD7	stable	84078
0.305689	6.17823	7.82518	7.78072e-14	1.14635e-12	20.6739	7952004	SCN4B	stable	6330
0.247645	3.42159	7.8231	7.88902e-14	1.16128e-12	20.6604	7948354	GLYATL2	stable	219970
-0.17196	6.06444	-7.82135	7.98123e-14	1.17433e-12	20.649	8067802	RGS19	stable	10287
-0.214435	5.85249	-7.82125	7.98678e-14	1.17463e-12	20.6483	8006063	ANKRD13B	stable	124930
-0.348159	7.93479	-7.82106	7.99653e-14	1.17554e-12	20.6471	7961702	KCNJ8	stable	3764
-0.19597	9.99471	-7.81718	8.20558e-14	1.20574e-12	20.6218	8089652	NAA50	stable	80218
-0.270403	6.09548	-7.81512	8.31905e-14	1.22134e-12	20.6083	8152340	NUDCD1	stable	84955
-0.15801	6.31896	-7.81427	8.36597e-14	1.22768e-12	20.6028	8019308	MAFG	stable	4097
0.0929582	9.64911	7.81272	8.4529e-14	1.23933e-12	20.5926	8058024	SF3B1	stable	23451
-0.19437	7.80179	-7.81267	8.45568e-14	1.23933e-12	20.5923	8133788	PTPN12	stable	5782
-0.177264	5.40262	-7.81265	8.45646e-14	1.23933e-12	20.5922	8072777	MPST	stable	4357
-0.215046	6.87575	-7.81175	8.50757e-14	1.24627e-12	20.5863	8099037	MFSD10	stable	10227
0.468085	3.61703	7.80754	8.74857e-14	1.28045e-12	20.5589	8067944	MIRLET7C	up	406885
0.367258	5.00956	7.80692	8.78484e-14	1.28519e-12	20.5548	8081235	COL8A1	stable	1295
0.727652	8.22258	7.80671	8.79705e-14	1.28641e-12	20.5534	8107798	SLC27A6	up	28965
0.209645	6.93737	7.8041	8.95099e-14	1.30834e-12	20.5364	8026182	MRI1	stable	84245
0.214567	9.56052	7.80258	9.04181e-14	1.32104e-12	20.5265	8097586	GAB1	stable	2549
0.209725	6.25348	7.79767	9.3415e-14	1.36423e-12	20.4945	8064808	SLC23A2	stable	9962
-0.220987	7.5313	-7.79477	9.52275e-14	1.39009e-12	20.4756	8092905	LSG1	stable	55341
0.353168	5.03852	7.79129	9.7451e-14	1.42192e-12	20.453	7991478	PGPEP1L	stable	145814
-0.193125	6.14824	-7.79063	9.78808e-14	1.42757e-12	20.4487	8176098	UBL4A	stable	8266
-0.153631	7.71337	-7.78634	1.00704e-13	1.4681e-12	20.4208	8044462	TTL	stable	150465
0.191147	8.67795	7.78493	1.0165e-13	1.48125e-12	20.4116	8145660	DCTN6	stable	10671
0.337131	5.9328	7.78349	1.02629e-13	1.49486e-12	20.4022	8104663	CDH6	stable	1004
-0.262532	7.46598	-7.78098	1.04347e-13	1.51922e-12	20.3859	8026300	ADGRE5	stable	976
0.366315	5.63471	7.77973	1.05219e-13	1.53125e-12	20.3777	7957570	PLXNC1	stable	10154
0.250148	7.8787	7.77623	1.07683e-13	1.56164e-12	20.355	7984569	LRRC49	stable	54839
0.176391	2.97128	7.77594	1.0789e-13	1.56294e-12	20.3531	8092741	UTS2B	stable	257313
-0.513365	5.29205	-7.77591	1.07914e-13	1.56294e-12	20.3529	7905131	CA14	down	23632
0.122558	8.42983	7.77099	1.11491e-13	1.61335e-12	20.3209	8017776	HELZ	stable	9931
-0.18471	8.55281	-7.77068	1.11717e-13	1.61591e-12	20.3189	8121704	NUS1	stable	116150
0.229493	9.03742	7.76979	1.1238e-13	1.6248e-12	20.3131	8121927	RNF146	stable	81847
0.339325	5.13126	7.76772	1.13932e-13	1.64653e-12	20.2996	7988208	CATSPER2P1	stable	440278
-0.355463	4.31583	-7.76607	1.15185e-13	1.66319e-12	20.2889	8093839	NSG1	stable	27065
-0.198528	5.91	-7.76575	1.15427e-13	1.66597e-12	20.2868	8148841	SLC52A2	stable	79581
-0.185992	7.05169	-7.76495	1.16036e-13	1.67402e-12	20.2817	8139468	TBRG4	stable	9238
-0.186034	6.08937	-7.76417	1.16643e-13	1.68205e-12	20.2766	8112883	LOC644936	stable	644936
-0.257634	5.48309	-7.76407	1.16719e-13	1.68242e-12	20.2759	7937208	FUOM	stable	282969
-0.227755	6.06018	-7.76047	1.19534e-13	1.72151e-12	20.2525	7989718	RASL12	stable	51285
0.264565	5.6677	7.7597	1.20143e-13	1.72953e-12	20.2475	8092661	MASP1	stable	5648
-0.251041	5.40791	-7.75923	1.20515e-13	1.73414e-12	20.2445	8124806	NRM	stable	11270
0.337376	4.92463	7.75915	1.20581e-13	1.73433e-12	20.244	7930631	TDRD1	stable	56165
-0.174864	4.1892	-7.75744	1.21951e-13	1.75328e-12	20.2329	7974198	LRR1	stable	122769
0.255183	3.16457	7.75689	1.22396e-13	1.75892e-12	20.2293	8064904	FERMT1	stable	55612
-0.703056	7.38979	-7.75626	1.22909e-13	1.76554e-12	20.2252	7964834	CPM	down	1368
1.73271	7.49593	7.75581	1.23276e-13	1.77004e-12	20.2223	7912515	NPPA	up	4878
0.410255	6.65736	7.75271	1.25828e-13	1.80591e-12	20.2022	8072015	GRK3	up	157
0.277371	8.31328	7.75245	1.26044e-13	1.80823e-12	20.2005	8129497	EPB41L2	stable	2037
0.338239	5.99059	7.75203	1.26391e-13	1.81242e-12	20.1978	7964997	CAPS2	stable	84698
0.118032	8.42466	7.7486	1.29293e-13	1.85243e-12	20.1755	8041283	BIRC6	stable	57448
0.127331	8.40023	7.74824	1.29601e-13	1.85606e-12	20.1732	8097600	SMARCA5	stable	8467
0.143395	8.03032	7.74789	1.29903e-13	1.85878e-12	20.1709	8120758	SENP6	stable	26054
0.262561	6.80839	7.74643	1.31165e-13	1.87604e-12	20.1614	8074399	CLTCL1	stable	8218
0.146461	4.41839	7.74387	1.33403e-13	1.90722e-12	20.1448	7917548	GBP7	stable	388646
0.210096	6.23612	7.74198	1.35074e-13	1.92945e-12	20.1326	7908178	SWT1	stable	54823
-0.186982	7.04272	-7.74158	1.35431e-13	1.93372e-12	20.13	8032455	PLEKHJ1	stable	55111
0.15802	6.38583	7.73821	1.38482e-13	1.97479e-12	20.1082	8098500	CDKN2AIP	stable	55602
-0.169653	8.84682	-7.73821	1.38485e-13	1.97479e-12	20.1081	8084488	POLR2H	stable	5437
0.210232	5.66696	7.7381	1.38587e-13	1.9754e-12	20.1074	8009443	ARSG	stable	22901
-0.256484	5.02915	-7.73386	1.42518e-13	2.02929e-12	20.08	8116649	TUBB2A	stable	7280
-0.17284	5.79633	-7.73382	1.42551e-13	2.02929e-12	20.0797	8035477	ELL	stable	8178
-0.266434	5.17366	-7.73248	1.43826e-13	2.04657e-12	20.071	8066985	RIPOR3	stable	140876
0.511138	6.68839	7.72511	1.50987e-13	2.14663e-12	20.0233	7929065	IFIT1	up	3434
-0.2798	6.94113	-7.72442	1.51683e-13	2.15561e-12	20.0188	8122440	LTV1	stable	84946
-0.699961	4.80571	-7.72359	1.5251e-13	2.16644e-12	20.0135	8077499	LINC00312	down	29931
-0.313506	9.01222	-7.72268	1.53434e-13	2.17864e-12	20.0075	8088958	GBE1	stable	2632
0.209797	4.47547	7.72126	1.54875e-13	2.19815e-12	19.9984	8021001	KIAA1328	stable	57536
0.313811	7.27874	7.71468	1.61738e-13	2.29458e-12	19.9558	8113691	DTWD2	stable	285605
0.130208	8.97602	7.71032	1.66459e-13	2.35955e-12	19.9276	7913300	HP1BP3	stable	50809
0.426991	7.10167	7.70944	1.67428e-13	2.37228e-12	19.9219	8106393	F2R	up	2149
0.161562	6.32101	7.7013	1.76653e-13	2.49979e-12	19.8693	8008074	CDK5RAP3	stable	80279
0.195106	7.58459	7.70117	1.76804e-13	2.50086e-12	19.8684	7932885	ARHGAP12	stable	94134
-0.557501	8.5229	-7.69823	1.8025e-13	2.54637e-12	19.8495	8004510	CD68	down	968
0.163538	8.58895	7.69778	1.8079e-13	2.55291e-12	19.8466	8115895	KIAA1191	stable	57179
-0.44159	4.69695	-7.69728	1.81381e-13	2.56017e-12	19.8434	7987145	FMN1	down	342184
-0.139927	6.20917	-7.69702	1.81695e-13	2.56352e-12	19.8417	7990400	ULK3	stable	25989
0.287609	6.16467	7.69645	1.82373e-13	2.57199e-12	19.838	7950082	LOC100133315	stable	100133315
-0.182852	5.62136	-7.69635	1.82495e-13	2.57262e-12	19.8374	8083214	CHST2	stable	9435
-0.362397	6.13889	-7.69448	1.84752e-13	2.60224e-12	19.8253	7953211	TIGAR	stable	57103
-0.354162	7.83939	-7.69368	1.85728e-13	2.61378e-12	19.8201	8100393	KDR	stable	3791
0.211751	4.32545	7.69283	1.8677e-13	2.62732e-12	19.8146	7906475	FCRL6	stable	343413
-0.411565	5.81767	-7.69196	1.87843e-13	2.6413e-12	19.809	7914112	FGR	down	2268
0.194716	5.22552	7.69179	1.88055e-13	2.64316e-12	19.8079	8039362	DNAAF3	stable	352909
-0.154236	6.22668	-7.68812	1.92659e-13	2.70652e-12	19.7842	8073135	MIEF1	stable	54471
0.217681	9.4506	7.68806	1.92725e-13	2.70652e-12	19.7838	8156263	SPIN1	stable	10927
-0.179394	6.51016	-7.6815	2.01227e-13	2.82354e-12	19.7415	7948192	SSRP1	stable	6749
-0.308153	6.23521	-7.6814	2.0135e-13	2.82407e-12	19.7409	7905789	IL6R	stable	3570
0.346916	4.38507	7.68128	2.01515e-13	2.82519e-12	19.7401	7953278	KCNA5	stable	3741
0.194629	8.76476	7.68119	2.01637e-13	2.82572e-12	19.7395	7983606	EID1	stable	23741
0.372102	3.28828	7.67842	2.05341e-13	2.8752e-12	19.7216	8013567	LYRM9	stable	201229
0.173873	7.66699	7.67816	2.05693e-13	2.87893e-12	19.72	8158686	FUBP3	stable	8939
0.230238	5.8272	7.67385	2.11604e-13	2.95916e-12	19.6922	8031744	ZNF17	stable	7565
-0.271612	3.43761	-7.67315	2.12578e-13	2.97153e-12	19.6877	8068120	GRIK1-AS2	stable	100379661
0.172328	6.52637	7.66775	2.2025e-13	3.07491e-12	19.6529	7936891	EEF1AKMT2	stable	399818
-0.188581	6.66661	-7.6648	2.24559e-13	3.13376e-12	19.6339	8102162	INTS12	stable	57117
0.536492	8.39338	7.66148	2.29498e-13	3.19999e-12	19.6125	8057377	CCDC141	up	285025
-0.222121	5.2851	-7.65936	2.32721e-13	3.24223e-12	19.5988	8139021	KIAA0895	stable	23366
0.188884	5.94029	7.65844	2.34131e-13	3.26051e-12	19.5929	7979516	TRMT5	stable	57570
0.276138	5.26916	7.65699	2.36368e-13	3.29028e-12	19.5836	8037767	PNMA8A	stable	55228
0.274449	6.96585	7.65591	2.3804e-13	3.31217e-12	19.5767	8060854	PLCB1	stable	23236
0.207688	4.93004	7.65215	2.43986e-13	3.39065e-12	19.5525	8158637	HMCN2	stable	256158
0.175807	7.17622	7.65179	2.44564e-13	3.39726e-12	19.5502	8039034	ZNF160	stable	90338
-0.154518	8.95279	-7.65098	2.45872e-13	3.41401e-12	19.5449	8097704	TMEM184C	stable	55751
0.415667	4.92355	7.64764	2.51307e-13	3.48802e-12	19.5235	8091523	P2RY13	up	53829
-0.159441	6.87306	-7.64183	2.61067e-13	3.62047e-12	19.4861	8141425	TAF6	stable	6878
-0.178001	6.36819	-7.64162	2.61419e-13	3.62384e-12	19.4848	7985482	WHAMM	stable	123720
-0.187186	9.98529	-7.6415	2.6163e-13	3.62526e-12	19.484	7976598	PAPOLA	stable	10914
-0.219282	5.81336	-7.64073	2.62945e-13	3.6396e-12	19.4791	7994659	MVP	stable	9961
-0.288899	5.03805	-7.6407	2.62993e-13	3.6396e-12	19.4789	8162759	TBC1D2	stable	55357
0.304483	5.78252	7.63966	2.64793e-13	3.66299e-12	19.4722	8040815	ABHD1	stable	84696
-0.248445	8.52403	-7.63889	2.66134e-13	3.68e-12	19.4672	8076331	TOB2	stable	10766
-0.173603	7.57718	-7.63817	2.67389e-13	3.69583e-12	19.4626	8033465	TIMM44	stable	10469
-0.203594	5.38658	-7.63647	2.70392e-13	3.73578e-12	19.4517	8028016	PROSER3	stable	148137
-0.190545	10.9329	-7.63405	2.74709e-13	3.79099e-12	19.4361	8101659	SPARCL1	stable	8404
0.442752	8.30229	7.63366	2.75399e-13	3.79866e-12	19.4337	7962375	PRICKLE1	up	144165
0.288828	6.45903	7.63282	2.76934e-13	3.81824e-12	19.4282	8003722	SRR	stable	63826
-0.220891	11.2191	-7.63015	2.81806e-13	3.879e-12	19.4111	8117995	TUBB	stable	203068
-0.138798	7.85383	-7.62758	2.86591e-13	3.9416e-12	19.3946	8137865	GNA12	stable	2768
0.243033	5.88307	7.6273	2.87119e-13	3.94723e-12	19.3928	8157949	RALGPS1	stable	9649
-0.15552	6.91886	-7.62579	2.89961e-13	3.98466e-12	19.3831	8080100	RAD54L2	stable	23132
-0.21165	6.88072	-7.62532	2.90859e-13	3.99535e-12	19.3801	8099051	NOP14	stable	8602
-0.154583	6.61811	-7.62397	2.9344e-13	4.02748e-12	19.3714	8083119	RNF7	stable	9616
0.448956	10.1968	7.6232	2.94925e-13	4.0462e-12	19.3665	8135821	LMOD2	up	442721
0.292927	7.19405	7.61974	3.01666e-13	4.13527e-12	19.3443	8014100	C17orf75	stable	64149
0.31882	6.24212	7.61819	3.04745e-13	4.17576e-12	19.3344	8054064	ANKRD36B	stable	57730
0.1687	5.82911	7.61717	3.0677e-13	4.20178e-12	19.3279	8116335	MRNIP	stable	51149
-0.218027	7.24091	-7.6142	3.12803e-13	4.28089e-12	19.3088	7942417	ARHGEF17	stable	9828
0.285805	9.64426	7.61297	3.15308e-13	4.3134e-12	19.3009	8095751	PARM1	stable	25849
-0.353801	4.00415	-7.61289	3.15489e-13	4.31411e-12	19.3004	8039236	LILRA5	stable	353514
-0.277194	8.80291	-7.60589	3.30243e-13	4.51214e-12	19.2556	7963880	ITGA7	stable	3679
0.198895	6.80792	7.60454	3.33172e-13	4.55031e-12	19.2469	8153890	ZNF251	stable	90987
-0.151689	4.90588	-7.60432	3.33652e-13	4.5536e-12	19.2455	8050591	NDUFAF2	stable	91942
0.201416	5.2956	7.60082	3.41368e-13	4.65651e-12	19.2231	8096147	WDFY3-AS2	stable	404201
0.263428	7.05078	7.59959	3.44108e-13	4.69004e-12	19.2152	8151890	TP53INP1	stable	94241
-0.16872	7.08669	-7.59836	3.4689e-13	4.7244e-12	19.2073	8017106	TRIM37	stable	4591
-0.197077	5.70444	-7.59835	3.46913e-13	4.7244e-12	19.2073	8007435	RUNDC1	stable	146923
0.201006	3.94768	7.59657	3.5096e-13	4.77756e-12	19.1959	8084732	RTP4	stable	64108
0.384274	4.5216	7.59618	3.51857e-13	4.78782e-12	19.1934	7994826	ITGAL	stable	3683
0.691293	7.07802	7.58744	3.72498e-13	5.05835e-12	19.1375	7969955	METTL21EP	up	121952
0.2244	7.86536	7.58529	3.77749e-13	5.12548e-12	19.1237	8103106	LRBA	stable	987
-0.270933	9.78362	-7.58512	3.78178e-13	5.12921e-12	19.1226	8143307	HIPK2	stable	28996
0.132975	8.63416	7.58484	3.78857e-13	5.13633e-12	19.1209	8157700	RABGAP1	stable	23637
0.199838	5.544	7.5814	3.87451e-13	5.25069e-12	19.0989	8076025	PLA2G6	stable	8398
0.233557	5.05085	7.57998	3.91053e-13	5.29735e-12	19.0898	8172379	ZNF630	stable	57232
0.519033	6.44768	7.57896	3.93662e-13	5.33053e-12	19.0833	8018006	ABCA10	up	10349
[truncated: 16,419 more rows]
