# Supplementary material for: Identification of TGF-β-related genes in cardiac hypertrophy and heart failure based on single cell RNA sequencing
Source: Aging (Albany NY). 2023 Jul 26;15(14):7187–218. doi: 10.18632/aging.204901 (PMC10415570; doi:10.18632/aging.204901)
Supplement: Supplementary Table 5 [file aging-15-204901-s005.xlsx]

## Sheet: Sheet1
Supplementary Table 5. Genes in the three gene modules by WGCNA.
royalblue	brown4	darkturquoise
PHGDH	VCAM1	NSUN4
VOPP1	CDC42SE1	ROR1
ECM1	SELE	FAM46C
ATP8B2	TNFSF18	RNF115
PRG4	RGS16	TUFT1
PLA2G4A	PTGS2	UCK2
MFAP2	DUSP5	GORAB
SDC3	EGR2	RASAL2
DOCK7	CH25H	XPR1
CNN3	NR4A1	ATP2B4
NOTCH2	SLC2A14	G0S2
ARHGEF2	SLC2A3	DIEXF
CRABP2	RND1	TGFB2
CSRP1	HCAR3	LRRC41
FAS	FOS	NEGR1
HECTD2	TNFAIP2	NEXN-AS1
MARVELD1	DLL4	FUBP1
ARHGAP22	CHSY1	DDAH1
ALDH18A1	CX3CL1	DENND2C
ADAM12	KDM6B	SELENBP1
SPON1	CCL2	CD5L
CD44	CCL8	COPA
PRR5L	CCL4	ILDR2
EXT2	MIR21	PTPN14
CAPN5	CCL3	TP53BP2
PRSS23	SOCS3	ENAH
TAGLN	USP36	PFKP
OAF	MIDN	STAM
CAVIN3	ICAM1	OTUD1
ARRB1	ICAM4	MYPN
MAML2	LDLR	CHST3
KDELC2	JUNB	LRMDA
BACE1	IER2	IFIT1
MCAM	ZFP36	PI4K2A
THY1	BCL3	ENTPD7
EEF1AKMT3	FOSB	SLK
APAF1	ZNF331	BAG3
DYNLL1	NFKBID	INPP5F
TUBA1A	PELI1	PTPRE
FMNL3	SEMA4C	USP6NL
ANKS1B	IL1B	C10orf67
SLC41A2	NR4A2	IPMK
CMKLR1	SNAI1	NT5C2
TMEM119	ADAMTS1	NRAP
LSP1	ZBTB21	PNPLA2
KDELC1	MAFF	NCR3LG1
MMP14	CLDN5	AMOTL1
DACT1	BHLHE40	ARHGEF12
PPM1A	HES1	RRAS2
VASH1	CCNL1	CSRP3
SPRED1	CXCL8	BDNF
SLC12A1	CXCL1	CLCF1
LOXL1	CXCL2	C11orf24
ATP10A	EGR1	SCN3B
GPR176	IRF1	SLC48A1
MYO1E	TNF	DAZAP2
CILP	TNFAIP3	ATP23
ITPRIPL2	IL6	TDG
NDRG4	TCIM	ACACB
HPR	EGR3	TRAFD1
CMIP	TNFRSF10D	RNF34
PLCG2	RNF122	CKAP4
DOK4	NR4A3	TBX5
CDH11	SLC25A25	SAP18
CHST6	MIR221	FNDC3A
HSDL1	MIR222	KLF5
KSR1		IPO5
SLFN5		FARP1
FKBP10		UBAC2
MRC2		LATS2
TANC2		SACS
P2RX1		USP12
RAB34		PCDH9
MEOX1		LINC00346
COL1A1		MIR323A
SMURF2		AJUBA
RAB31		EGLN3
TMEM241		CFL2
RCN3		CHAC1
CPT1C		FEM1B
TSHZ3		NEIL1
PTGIR		UBE2Q2
EML4		ABHD2
GLI2		ZNF774
DHRS9		LPCAT4
COL3A1		FSIP1
MYO1B		ITGA11
PLCL1		ADAMTS7
NRP2		TNFRSF12A
FAM49A		KIAA0556
CYP1B1		CYLD
LOXL3		CENPN
COL5A2		SMG1
SERPINE2		SNAI3
ASIP		NSRP1
RRBP1		SCPEP1
ZNF217		MAP3K3
BACE2		SOX9
PFKL		NAT9
COL6A1		MYL12A
COL6A2		TWSG1
TIAM1		MYO5B
RUNX1		ZNF516
SUSD2		FSTL3
KDELR3		U2AF2
SELENOM		DAPK3
C1QTNF6		PLIN4
RPL3		INSR
GAP43		FBXO27
ARHGEF26		PTPRH
OSBPL10		GALM
ITGB5		MAP4K4
ABCC5		XIRP2
FAM114A1		SLC39A10
PDGFRA		SPATS2L
CLCN3		MAP2
SPON2		DGKD
AFAP1		LRRFIP1
SEL1L3		YWHAQ
PAPSS1		ROCK2
ARSJ		HS1BP3
SCRG1		STRN
RAI14		EIF2AK3
GPX8		RND3
F2RL1		STK39
VCAN		CHRNA1
PRRC1		IDH1
GALNT10		AP1S3
DAP		PTPN1
ENC1		SEL1L2
SPATA24		CDH22
SPARC		BMP7
KCNMB1		PMEPA1
PDLIM7		NCAM2
ADAMTS2		MAP3K7CL
PHACTR1		SH3BGR
ID4		PKNOX1
TRIM38		RCAN1
APOBEC2		SETD4
MLIP		MYO18B
TCF21		EAF1
AKAP12		BTD
TULP4		KLHL40
GMDS		ST3GAL6
OR2W1		C3orf52
KLHL31		PXYLP1
FAM46A		TSC22D2
FYN		FNDC3B
THBS2		IL1RAP
FSCN1		XIRP1
ELN		SMARCC1
STEAP1		DCBLD2
COL1A2		P2RY14
DYNC1I1		TBL1XR1
THSD7A		DLG1
HERPUD2		RUBCN
GLI3		SLAIN2
TNS3		SHROOM3
HGF		EIF4E
TMEM243		SH3RF1
CREB3L2		CASP3
ZC3HAV1L		TRIO
CTHRC1		OTULIN
LOXL2		C5orf51
KCTD9		IL31RA
TRPS1		ERBIN
NDRG1		PDE8B
TMOD1		HSPA4
TGFBR1		CYSTM1
NIPSNAP3B		ARHGEF37
TMEM268		ZFR
PTGS1		SELENOP
NEK6		SSBP2
CERCAM		EFNA5
COL5A1		AFF4
GLIS3		HBEGF
TRPM3		DIAPH1
GNAQ		PRELID2
GOLM1		SPINK1
SHC3		RBM22
PHF19		ADAM19
FNBP1		PANK3
VAV2		TBC1D22B
NHSL2		SLC29A1
SRPX2		COL19A1
BGN		RNF217
CASK		TIAM2
MORC4		SYNJ2
FLNA		STK38
		DLK2
		SUPT3H
		AKIRIN2
		SLC18B1
		HIVEP2
		PDE10A
		GPR146
		MAFK
		RABGEF1
		LRRN3
		IFRD1
		CAV2
		CCDC136
		FLNC
		SBDS
		SRPK2
		BMT2
		LPL
		TRIM55
		C8orf46
		DEPTOR
		SQLE
		TRIB1
		ANGPT2
		PAG1
		AZIN1
		ABRA
		TNFRSF11B
		KLHL38
		CDC37L1
		NFX1
		DNAJB5
		POLR1E
		MAMDC2
		SMC5
		GADD45G
		PTPDC1
		MVB12B
		AQP7
		VCP
		RNF38
		SHB
		CDK20
		ALAD
		TTLL11
		FAM78A
		RALGDS
		PLP1
		FAM122C
		FHL1
		ACOT9
		BCOR
		YWHAQP8
		ACSL4
		GPC4
		FAM122B
