# Supplementary material for: Identification of TGF-β-related genes in cardiac hypertrophy and heart failure based on single cell RNA sequencing
Source: Aging (Albany NY). 2023 Jul 26;15(14):7187–218. doi: 10.18632/aging.204901 (PMC10415570; doi:10.18632/aging.204901)
Supplement: Supplementary Table 6 [file aging-15-204901-s006.xlsx]

## Sheet: Additional file 7. Table S6
Supplementary Table 6. Intersection results from DEGs in scRNA and gene modules from WGCNA.
symbol
NEGR1
CNN3
ECM1
CSRP1
CYP1B1
COL3A1
COL5A2
MYO1B
SERPINE2
ITGB5
ARHGEF26
HES1
AFAP1
FAM114A1
PDGFRA
SELENOP
ENC1
VCAN
EFNA5
EGR1
SPARC
ADAMTS2
MLIP
TCF21
AKAP12
THBS2
ELN
COL1A2
CREB3L2
SRPX2
BGN
TRPS1
NDRG1
GLIS3
MAMDC2
GNAQ
CERCAM
COL5A1
PRSS23
MAML2
TAGLN
OAF
MYPN
NRAP
TUBA1A
FMNL3
ANKS1B
MMP14
FOS
ATP10A
CILP
LOXL1
CDH11
RAB34
CCL2
CCL4
FKBP10
MEOX1
COL1A1
MRC2
SOCS3
RRBP1
TSHZ3
RCN3
CLDN5
MYO18B
SELENOM
NCAM2
ADAMTS1
COL6A1
COL6A2
RGS16
PDLIM7
NR4A1
DYNLL1
THSD7A
FOSB
CAVIN3
PTGIR
RND3
KLHL31
NHSL2
KDELC2
CMKLR1
CCL3
IER2
ZFP36
XIRP2
RAI14
JUNB
PMEPA1
TMEM241
TULP4
TRIM55
PHACTR1
NOTCH2
SELENBP1
BACE2
NDRG4
SPRED1
PLCL1
PFKL
SBDS
SOX9
FSTL3
GLI3
SLC2A3
FLNC
FNDC3B
ITGA11
LDLR
CYSTM1
XIRP1
ARHGAP22
CAV2
MCAM
TIAM1
GALNT10
CHSY1
PAPSS1
GMDS
UBE2Q2
SLC29A1
FHL1
SH3RF1
AMOTL1
SMURF2
SMC5
DAP
PTPRE
PELI1
ARRB1
ST3GAL6
PXYLP1
CKAP4
SAP18
PRRC1
TGFB2
CASK
FYN
MAP2
XPR1
TRIO
BHLHE40
SPON1
NSRP1
COPA
TANC2
RRAS2
SPON2
BMT2
HIVEP2
AQP7
TGFBR1
CD44
CCNL1
MYO1E
TMOD1
YWHAQ
ARHGEF2
IL1B
ICAM1
CXCL8
DEPTOR
CSRP3
CMIP
LPL
ACACB
CXCL2
RASAL2
DIAPH1
ABCC5
TNFAIP3
OTUD1
SCPEP1
DOCK7
PLCG2
ROR1
SHROOM3
STRN
FLNA
OTULIN
NR4A2
UBAC2
LSP1
PTPN1
RUBCN
DYNC1I1
ARHGEF12
MIDN
MYL12A
DGKD
TIAM2
IRF1
PCDH9
STK39
PDE10A
CDC37L1
PRELID2
RPL3
SYNJ2
DAPK3
STAM
CLCN3
ABHD2
RNF34
LRMDA
PTPN14
COL19A1
STK38
FNDC3A
SUPT3H
LRRFIP1
TNFRSF12A
DLG1
ENAH
SRPK2
ATP2B4
INSR
MAP3K3
NT5C2
DCBLD2
EIF2AK3
TSC22D2
SMG1
CFL2
