# Supplementary material for: Identification of TGF-β-related genes in cardiac hypertrophy and heart failure based on single cell RNA sequencing
Source: Aging (Albany NY). 2023 Jul 26;15(14):7187–218. doi: 10.18632/aging.204901 (PMC10415570; doi:10.18632/aging.204901)
Supplement: Supplementary Table 9 [file aging-15-204901-s008.xlsx]

## Sheet: Sheet1
Supplementary Table 9. Human transcription factor list.
Species	Symbol	Ensembl	Family	Protein	Entrez ID
Homo_sapiens	ZBTB8B	ENSG00000273274	ZBTB	ENSP00000476499;ENSP00000476499;	728116
Homo_sapiens	GSX2	ENSG00000180613	Homeobox	ENSP00000319118;ENSP00000483522;	170825
Homo_sapiens	TBX2	ENSG00000121068	T-box	ENSP00000404781;ENSP00000240328;	6909
Homo_sapiens	PAX8	ENSG00000125618	PAX	ENSP00000395498;ENSP00000263335;ENSP00000380768;ENSP00000263334;ENSP00000314750;	7849
Homo_sapiens	CREB3L1	ENSG00000157613	TF_bZIP	ENSP00000481956;ENSP00000436574;	90993
Homo_sapiens	NKX6-1	ENSG00000163623	Homeobox	ENSP00000295886;ENSP00000449761;	4825
Homo_sapiens	ZNF621	ENSG00000172888	zf-C2H2	ENSP00000386051;ENSP00000340841;ENSP00000413236;	285268
Homo_sapiens	ZNF138	ENSG00000197008	zf-C2H2	ENSP00000303533;ENSP00000399528;ENSP00000407262;	7697
Homo_sapiens	ZNF654	ENSG00000175105	zf-C2H2	ENSP00000312141;ENSP00000490842;	55279
Homo_sapiens	POU3F3	ENSG00000198914	Pou	ENSP00000355001;	5455
Homo_sapiens	ALX1	ENSG00000180318	Homeobox	ENSP00000315417;	8092
Homo_sapiens	EMX1	ENSG00000135638	Homeobox	ENSP00000258106;ENSP00000446992;	2016
Homo_sapiens	ZNF718	ENSG00000250312	zf-C2H2	ENSP00000476435;ENSP00000480556;	255403
Homo_sapiens	VSX2	ENSG00000119614	Homeobox	ENSP00000261980;	338917
Homo_sapiens	POU1F1	ENSG00000064835	Pou	ENSP00000454072;ENSP00000342931;ENSP00000263781;	5449
Homo_sapiens	RARA	ENSG00000131759	THR-like	ENSP00000377649;ENSP00000377648;ENSP00000377643;ENSP00000462514;ENSP00000254066;ENSP00000389993;	5914
Homo_sapiens	TLX3	ENSG00000164438	Homeobox	ENSP00000296921;	30012
Homo_sapiens	ZIC2	ENSG00000043355	zf-C2H2	ENSP00000365514;	7546
Homo_sapiens	ZNF226	ENSG00000167380	zf-C2H2	ENSP00000465121;ENSP00000393265;ENSP00000336719;	7769
Homo_sapiens	ZNF808	ENSG00000198482	zf-C2H2	ENSP00000420522;ENSP00000352846;	388558
Homo_sapiens	AC067968.1	ENSG00000267022	zf-C2H2	ENSP00000467018;	-
Homo_sapiens	NR3C1	ENSG00000113580	ESR-like	ENSP00000427672;ENSP00000343205;ENSP00000405282;ENSP00000422518;ENSP00000231509;ENSP00000377977;ENSP00000387672;ENSP00000377979;	2908
Homo_sapiens	HIC2	ENSG00000169635	ZBTB	ENSP00000385319;ENSP00000385319;ENSP00000384889;ENSP00000387757;	23119
Homo_sapiens	ZNF442	ENSG00000198342	zf-C2H2	ENSP00000440162;ENSP00000242804;ENSP00000388634;ENSP00000404935;	79973
Homo_sapiens	FOSL1	ENSG00000175592	TF_bZIP	ENSP00000310170;	8061
Homo_sapiens	MTF1	ENSG00000188786	zf-C2H2	ENSP00000362127;	4520
Homo_sapiens	YBX3	ENSG00000060138	CSD	ENSP00000279550;ENSP00000228251;ENSP00000485718;	8531
Homo_sapiens	ZNF705A	ENSG00000196946	zf-C2H2	ENSP00000379816;ENSP00000481663;ENSP00000352233;	440077
Homo_sapiens	NFE2	ENSG00000123405	TF_bZIP	ENSP00000397185;ENSP00000447558;ENSP00000312436;ENSP00000446929;ENSP00000439120;	4778
Homo_sapiens	RAX2	ENSG00000173976	Homeobox	ENSP00000450687;ENSP00000450456;	84839
Homo_sapiens	SP1	ENSG00000185591	zf-C2H2	ENSP00000329357;ENSP00000404263;	6667
Homo_sapiens	ARID3A	ENSG00000116017	ARID	ENSP00000263620;ENSP00000464969;	1820
Homo_sapiens	FEZF1	ENSG00000128610	zf-C2H2	ENSP00000392727;ENSP00000411145;	389549
Homo_sapiens	THAP4	ENSG00000176946	THAP	ENSP00000385006;	51078
Homo_sapiens	ZNF286A	ENSG00000187607	zf-C2H2	ENSP00000466154;ENSP00000397163;ENSP00000464063;ENSP00000464218;	57335
Homo_sapiens	FOXQ1	ENSG00000164379	Fork_head	ENSP00000296839;	94234
Homo_sapiens	AIRE	ENSG00000160224	SAND	ENSP00000291582;	326
Homo_sapiens	SNAI3	ENSG00000185669	zf-C2H2	ENSP00000327968;	333929
Homo_sapiens	ZNF224	ENSG00000267680	zf-C2H2	ENSP00000337368;	7767
Homo_sapiens	ATOH8	ENSG00000168874	bHLH	ENSP00000304676;	84913
Homo_sapiens	MECOM	ENSG00000085276	zf-C2H2	ENSP00000420072;ENSP00000419770;ENSP00000417299;ENSP00000394302;ENSP00000417506;ENSP00000420466;ENSP00000486104;ENSP00000417922;ENSP00000420048;ENSP00000264674;ENSP00000419757;ENSP00000417899;ENSP00000419995;	2122
Homo_sapiens	ZNF45	ENSG00000124459	zf-C2H2	ENSP00000269973;ENSP00000468579;ENSP00000481895;	7596
Homo_sapiens	ZNF674	ENSG00000251192	zf-C2H2	ENSP00000428248;ENSP00000429148;	641339
Homo_sapiens	ZXDA	ENSG00000198205	zf-C2H2	ENSP00000351530;	7789
Homo_sapiens	ST18	ENSG00000147488	zf-C2HC	ENSP00000428521;ENSP00000276480;	9705
Homo_sapiens	NKX6-2	ENSG00000148826	Homeobox	ENSP00000357581;	84504
Homo_sapiens	ZNF689	ENSG00000156853	zf-C2H2	ENSP00000287461;	115509
Homo_sapiens	ZNF449	ENSG00000173275	zf-C2H2	ENSP00000339585;	203523
Homo_sapiens	ZNF2	ENSG00000275111	zf-C2H2	ENSP00000480057;ENSP00000480297;ENSP00000483131;ENSP00000477960;ENSP00000482030;	7549
Homo_sapiens	TFDP2	ENSG00000114126	E2F	ENSP00000418122;ENSP00000417726;ENSP00000417585;ENSP00000417220;ENSP00000418971;ENSP00000420616;ENSP00000418590;ENSP00000439782;ENSP00000420599;ENSP00000419036;	7029
Homo_sapiens	ZBTB25	ENSG00000089775	ZBTB	ENSP00000378204;ENSP00000451046;ENSP00000476746;	7597
Homo_sapiens	PIAS4	ENSG00000105229	zf-MIZ	ENSP00000262971;	51588
Homo_sapiens	HES4	ENSG00000188290	bHLH	ENSP00000393198;ENSP00000425085;ENSP00000304595;	57801
Homo_sapiens	ZNF592	ENSG00000166716	zf-C2H2	ENSP00000452877;ENSP00000299927;	9640
Homo_sapiens	WT1	ENSG00000184937	zf-C2H2	ENSP00000491511;ENSP00000413452;ENSP00000331327;ENSP00000368370;ENSP00000415516;ENSP00000491984;ENSP00000435624;ENSP00000492269;ENSP00000435307;	7490
Homo_sapiens	ZBTB49	ENSG00000168826	ZBTB	ENSP00000338807;ENSP00000338807;ENSP00000425747;ENSP00000426765;ENSP00000424525;ENSP00000421654;ENSP00000422321;	166793
Homo_sapiens	PAX5	ENSG00000196092	PAX	ENSP00000429197;ENSP00000350844;ENSP00000430773;ENSP00000367078;ENSP00000429359;ENSP00000367084;ENSP00000429637;ENSP00000412188;ENSP00000367083;ENSP00000367071;ENSP00000404687;ENSP00000429291;ENSP00000431038;	5079
Homo_sapiens	MAFG	ENSG00000197063	TF_bZIP	ENSP00000376173;ENSP00000350369;ENSP00000459634;	4097
Homo_sapiens	ZNF837	ENSG00000152475	zf-C2H2	ENSP00000405699;ENSP00000471478;	116412
Homo_sapiens	FOXD4	ENSG00000170122	Fork_head	ENSP00000371940;	2298
Homo_sapiens	GATA3	ENSG00000107485	zf-GATA	ENSP00000341619;ENSP00000494926;ENSP00000368632;	2625
Homo_sapiens	HOMEZ	ENSG00000215271	Homeobox	ENSP00000453979;ENSP00000475307;ENSP00000350049;	57594
Homo_sapiens	ZNF26	ENSG00000198393	zf-C2H2	ENSP00000333725;ENSP00000437420;	7574
Homo_sapiens	ZSCAN20	ENSG00000121903	zf-C2H2	ENSP00000355053;	7579
Homo_sapiens	MEOX2	ENSG00000106511	Homeobox	ENSP00000262041;	4223
Homo_sapiens	DMRTA1	ENSG00000176399	DM	ENSP00000319651;	63951
Homo_sapiens	ZNF567	ENSG00000189042	zf-C2H2	ENSP00000467712;ENSP00000441838;ENSP00000467379;ENSP00000353957;	163081
Homo_sapiens	OVOL1	ENSG00000172818	zf-C2H2	ENSP00000434220;ENSP00000337862;	5017
Homo_sapiens	PRRX2	ENSG00000167157	Homeobox	ENSP00000361547;	51450
Homo_sapiens	MAFB	ENSG00000204103	TF_bZIP	ENSP00000362410;	9935
Homo_sapiens	ZNF195	ENSG00000005801	zf-C2H2	ENSP00000387998;ENSP00000344483;ENSP00000435828;ENSP00000431937;ENSP00000005082;ENSP00000346613;ENSP00000477630;ENSP00000382511;	7748
Homo_sapiens	ZNF75D	ENSG00000186376	zf-C2H2	ENSP00000359800;ENSP00000359802;	7626
Homo_sapiens	PIAS2	ENSG00000078043	zf-MIZ	ENSP00000317163;ENSP00000465676;ENSP00000443238;ENSP00000479025;	9063
Homo_sapiens	FOXJ1	ENSG00000129654	Fork_head	ENSP00000323880;	2302
Homo_sapiens	GRHL1	ENSG00000134317	CP2	ENSP00000418275;ENSP00000384209;ENSP00000324693;	29841
Homo_sapiens	KLF11	ENSG00000172059	zf-C2H2	ENSP00000444690;ENSP00000442722;ENSP00000307023;	8462
Homo_sapiens	ATF2	ENSG00000115966	TF_bZIP	ENSP00000407911;ENSP00000387093;ENSP00000389504;ENSP00000437952;ENSP00000376327;ENSP00000412293;ENSP00000386326;ENSP00000340576;ENSP00000264110;ENSP00000402229;ENSP00000406995;	1386
Homo_sapiens	NFAT5	ENSG00000102908	RHD	ENSP00000455628;ENSP00000346420;ENSP00000457593;ENSP00000486610;ENSP00000338806;ENSP00000377343;ENSP00000462061;	10725
Homo_sapiens	MXD1	ENSG00000059728	bHLH	ENSP00000410672;ENSP00000443935;ENSP00000264444;ENSP00000386523;	4084
Homo_sapiens	SMAD3	ENSG00000166949	MH1	ENSP00000332973;ENSP00000453082;ENSP00000401133;ENSP00000455095;ENSP00000437757;ENSP00000453684;ENSP00000458060;	4088
Homo_sapiens	DMRT2	ENSG00000173253	DM	ENSP00000397494;ENSP00000350865;ENSP00000259622;ENSP00000371690;ENSP00000489226;ENSP00000371686;	10655
Homo_sapiens	BARHL1	ENSG00000125492	Homeobox	ENSP00000263610;ENSP00000444704;	56751
Homo_sapiens	IKZF4	ENSG00000123411	zf-C2H2	ENSP00000450020;ENSP00000448419;ENSP00000412101;ENSP00000262032;	64375
Homo_sapiens	ZNF607	ENSG00000198182	zf-C2H2	ENSP00000347338;ENSP00000466785;ENSP00000438015;	84775
Homo_sapiens	E2F7	ENSG00000165891	E2F	ENSP00000449284;ENSP00000447963;ENSP00000393639;ENSP00000448245;ENSP00000323246;	144455
Homo_sapiens	ZNF595	ENSG00000272602	zf-C2H2	ENSP00000477392;ENSP00000476367;ENSP00000476408;	152687
Homo_sapiens	ETV5	ENSG00000244405	ETS	ENSP00000413755;ENSP00000306894;	2119
Homo_sapiens	CSRNP3	ENSG00000178662	CSRNP_N	ENSP00000344042;ENSP00000412081;ENSP00000387195;ENSP00000386278;ENSP00000318258;	80034
Homo_sapiens	CEBPD	ENSG00000221869	TF_bZIP	ENSP00000386165;	1052
Homo_sapiens	ZNF669	ENSG00000188295	zf-C2H2	ENSP00000342818;ENSP00000404370;	79862
Homo_sapiens	TBX22	ENSG00000122145	T-box	ENSP00000487527;ENSP00000362393;ENSP00000362390;	50945
Homo_sapiens	ZNF304	ENSG00000131845	zf-C2H2	ENSP00000401642;ENSP00000470319;ENSP00000282286;ENSP00000375586;	57343
Homo_sapiens	FOXN4	ENSG00000139445	Fork_head	ENSP00000347354;ENSP00000474754;ENSP00000299162;	121643
Homo_sapiens	TBX6	ENSG00000149922	T-box	ENSP00000279386;ENSP00000485762;ENSP00000461223;ENSP00000378650;ENSP00000460425;	6911
Homo_sapiens	ZBED2	ENSG00000177494	zf-BED	ENSP00000321370;	79413
Homo_sapiens	HES5	ENSG00000197921	bHLH	ENSP00000367714;	388585
Homo_sapiens	ZNF283	ENSG00000167637	zf-C2H2	ENSP00000468708;ENSP00000327314;ENSP00000484852;	284349
Homo_sapiens	PLAG1	ENSG00000181690	zf-C2H2	ENSP00000404067;ENSP00000325546;ENSP00000416537;	5324
Homo_sapiens	ZNF512B	ENSG00000196700	zf-C2H2	ENSP00000358904;	57473
Homo_sapiens	ZNF486	ENSG00000256229	zf-C2H2	ENSP00000335042;	90649
Homo_sapiens	ZMIZ2	ENSG00000122515	zf-MIZ	ENSP00000409648;ENSP00000311778;ENSP00000396601;ENSP00000483853;ENSP00000265346;ENSP00000414723;	83637
Homo_sapiens	TERF2	ENSG00000132604	MYB	ENSP00000254942;	7014
Homo_sapiens	TFAM	ENSG00000108064	HMG	ENSP00000363002;ENSP00000378776;ENSP00000420588;	7019
Homo_sapiens	LCORL	ENSG00000178177	HTH	ENSP00000371661;ENSP00000371659;	254251
Homo_sapiens	THAP5	ENSG00000177683	THAP	ENSP00000400500;ENSP00000415841;	168451
Homo_sapiens	TCF15	ENSG00000125878	bHLH	ENSP00000246080;	6939
Homo_sapiens	ZNF75A	ENSG00000162086	zf-C2H2	ENSP00000482769;ENSP00000459566;	7627
Homo_sapiens	HMGB2	ENSG00000164104	HMG	ENSP00000296503;ENSP00000423001;ENSP00000404912;ENSP00000393448;	3148
Homo_sapiens	EGR3	ENSG00000179388	zf-C2H2	ENSP00000318057;ENSP00000430310;	1960
Homo_sapiens	ZFP69B	ENSG00000187801	zf-C2H2	ENSP00000354547;ENSP00000399664;	65243
Homo_sapiens	USF1	ENSG00000158773	bHLH	ENSP00000356998;ENSP00000356999;ENSP00000433041;ENSP00000435005;ENSP00000357000;	7391
Homo_sapiens	TBR1	ENSG00000136535	T-box	ENSP00000387023;ENSP00000393934;ENSP00000374205;	10716
Homo_sapiens	SMAD2	ENSG00000175387	MH1	ENSP00000467075;ENSP00000466254;ENSP00000349282;ENSP00000468732;ENSP00000468202;ENSP00000465971;ENSP00000384449;ENSP00000465355;ENSP00000262160;ENSP00000466193;	4087
Homo_sapiens	ZNF165	ENSG00000197279	zf-C2H2	ENSP00000366542;	7718
Homo_sapiens	HOXA11	ENSG00000005073	Homeobox	ENSP00000448962;ENSP00000006015;	3207
Homo_sapiens	LMX1A	ENSG00000162761	Homeobox	ENSP00000356868;ENSP00000294816;ENSP00000340226;	4009
Homo_sapiens	LHX6	ENSG00000106852	Homeobox	ENSP00000362860;ENSP00000475927;ENSP00000362859;ENSP00000377854;ENSP00000340137;ENSP00000441464;	26468
Homo_sapiens	ZNF155	ENSG00000204920	zf-C2H2	ENSP00000385163;ENSP00000270014;ENSP00000465691;ENSP00000481677;	7711
Homo_sapiens	ZNF16	ENSG00000170631	zf-C2H2	ENSP00000378369;ENSP00000484504;ENSP00000276816;	7564
Homo_sapiens	ZNF225	ENSG00000256294	zf-C2H2	ENSP00000468686;ENSP00000262894;	7768
Homo_sapiens	ZSCAN10	ENSG00000130182	zf-C2H2	ENSP00000459520;ENSP00000440047;ENSP00000458879;ENSP00000252463;	84891
Homo_sapiens	HNF1B	ENSG00000275410	Homeobox	ENSP00000482529;ENSP00000480291;ENSP00000482711;ENSP00000477524;ENSP00000478682;	6928
Homo_sapiens	AC008758.1	ENSG00000196826	zf-C2H2	ENSP00000404127;	-
Homo_sapiens	HOXA13	ENSG00000106031	Homeobox	ENSP00000222753;	3209
Homo_sapiens	MKX	ENSG00000150051	Homeobox	ENSP00000452751;ENSP00000364946;ENSP00000400896;	283078
Homo_sapiens	TBX1	ENSG00000184058	T-box	ENSP00000331791;ENSP00000331176;ENSP00000352483;	6899
Homo_sapiens	ZNF70	ENSG00000187792	zf-C2H2	ENSP00000339314;	7621
Homo_sapiens	ZNF282	ENSG00000170265	zf-C2H2	ENSP00000477841;	8427
Homo_sapiens	PRDM13	ENSG00000112238	zf-C2H2	ENSP00000358217;	59336
Homo_sapiens	ZNF786	ENSG00000197362	zf-C2H2	ENSP00000313516;ENSP00000417470;	136051
Homo_sapiens	ZNF547	ENSG00000152433	zf-C2H2	ENSP00000282282;	284306
Homo_sapiens	EOMES	ENSG00000163508	T-box	ENSP00000295743;ENSP00000388620;ENSP00000487112;	8320
Homo_sapiens	HOXB1	ENSG00000120094	Homeobox	ENSP00000355140;ENSP00000494703;	3211
Homo_sapiens	ZKSCAN3	ENSG00000189298	zf-C2H2	ENSP00000341883;ENSP00000366465;ENSP00000252211;	80317
Homo_sapiens	ZNF648	ENSG00000179930	zf-C2H2	ENSP00000344129;	127665
Homo_sapiens	MECP2	ENSG00000169057	MBD	ENSP00000301948;ENSP00000395535;ENSP00000484470;ENSP00000479736;ENSP00000384865;ENSP00000486978;ENSP00000492871;	4204
Homo_sapiens	WIZ	ENSG00000011451	zf-C2H2	ENSP00000445824;ENSP00000469534;ENSP00000495441;ENSP00000373933;ENSP00000263381;ENSP00000469022;	58525
Homo_sapiens	ZNF317	ENSG00000130803	zf-C2H2	ENSP00000353554;ENSP00000247956;	57693
Homo_sapiens	ZGLP1	ENSG00000220201	zf-GATA	ENSP00000385403;ENSP00000384434;	100125288
Homo_sapiens	BACH2	ENSG00000112182	TF_bZIP	ENSP00000437473;ENSP00000257749;ENSP00000397668;ENSP00000345642;ENSP00000384145;	60468
Homo_sapiens	IRX4	ENSG00000113430	Homeobox	ENSP00000424235;ENSP00000231357;ENSP00000423161;ENSP00000482393;ENSP00000481396;	50805
Homo_sapiens	IRF4	ENSG00000137265	IRF	ENSP00000436094;ENSP00000370343;	3662
Homo_sapiens	HOXA9	ENSG00000078399	Homeobox	ENSP00000343619;	3205
Homo_sapiens	SMAD7	ENSG00000101665	MH1	ENSP00000467621;ENSP00000262158;	4092
Homo_sapiens	ZNF613	ENSG00000176024	zf-C2H2	ENSP00000490115;ENSP00000293471;ENSP00000375671;	79898
Homo_sapiens	SOX30	ENSG00000039600	HMG	ENSP00000427984;ENSP00000265007;ENSP00000309343;	11063
Homo_sapiens	TSC22D4	ENSG00000166925	TSC22	ENSP00000377560;ENSP00000388168;ENSP00000300181;	81628
Homo_sapiens	MEOX1	ENSG00000005102	Homeobox	ENSP00000321684;ENSP00000377271;	4222
Homo_sapiens	ZNF438	ENSG00000183621	zf-C2H2	ENSP00000406934;ENSP00000364460;ENSP00000354663;ENSP00000333571;ENSP00000445461;ENSP00000413060;ENSP00000387546;ENSP00000412363;	220929
Homo_sapiens	TCF4	ENSG00000196628	bHLH	ENSP00000457649;ENSP00000456125;ENSP00000455179;ENSP00000381382;ENSP00000439656;ENSP00000348374;ENSP00000457765;ENSP00000490451;ENSP00000486072;ENSP00000490006;ENSP00000455984;ENSP00000490883;ENSP00000490832;ENSP00000455418;ENSP00000486670;ENSP00000457263;ENSP00000490625;ENSP00000455135;ENSP00000439827;ENSP00000478549;ENSP00000441562;ENSP00000454647;ENSP00000454366;ENSP00000346440;ENSP00000445202…	6925
Homo_sapiens	ZBTB18	ENSG00000179456	ZBTB	ENSP00000481278;ENSP00000481278;ENSP00000351539;ENSP00000351539;	10472
Homo_sapiens	RBPJL	ENSG00000124232	CSL	ENSP00000361826;ENSP00000341243;ENSP00000483978;ENSP00000361828;	11317
Homo_sapiens	LYL1	ENSG00000104903	bHLH	ENSP00000264824;	4066
Homo_sapiens	BHLHE22	ENSG00000180828	bHLH	ENSP00000318799;	27319
Homo_sapiens	AC010422.6	ENSG00000269693	zf-C2H2	ENSP00000473043;	-
Homo_sapiens	IRF3	ENSG00000126456	IRF	ENSP00000469113;ENSP00000366344;ENSP00000473128;ENSP00000470140;ENSP00000473176;ENSP00000470431;ENSP00000470905;ENSP00000400378;ENSP00000471896;ENSP00000472223;ENSP00000470436;ENSP00000310127;ENSP00000471358;	3661
Homo_sapiens	ZNF260	ENSG00000254004	zf-C2H2	ENSP00000467219;ENSP00000465834;ENSP00000464964;ENSP00000429803;	339324
Homo_sapiens	PROX2	ENSG00000119608	HPD	ENSP00000451223;ENSP00000451463;	283571
Homo_sapiens	TP63	ENSG00000073282	P53	ENSP00000389485;ENSP00000387839;ENSP00000392488;ENSP00000407144;ENSP00000394337;ENSP00000376254;ENSP00000346614;ENSP00000376253;ENSP00000264731;ENSP00000317510;ENSP00000376256;ENSP00000401661;	8626
Homo_sapiens	HOXA6	ENSG00000106006	Homeobox	ENSP00000222728;	3203
Homo_sapiens	DMRTB1	ENSG00000143006	DM	ENSP00000360500;	63948
Homo_sapiens	CCDC169-SOHLH2	ENSG00000250709	bHLH	ENSP00000421868;	100526761
Homo_sapiens	YY2	ENSG00000230797	zf-C2H2	ENSP00000389381;	404281
Homo_sapiens	ZNF143	ENSG00000166478	zf-C2H2	ENSP00000379849;ENSP00000379843;ENSP00000299606;ENSP00000379847;ENSP00000432154;	7702
Homo_sapiens	PBRM1	ENSG00000163939	HMG	ENSP00000386643;ENSP00000338302;ENSP00000378307;ENSP00000386529;ENSP00000349213;ENSP00000386601;ENSP00000386593;ENSP00000387775;ENSP00000296302;	55193
Homo_sapiens	ZNF841	ENSG00000197608	zf-C2H2	ENSP00000415453;ENSP00000470746;ENSP00000374185;ENSP00000471190;	284371
Homo_sapiens	ADNP	ENSG00000101126	Homeobox	ENSP00000495540;ENSP00000342905;ENSP00000379346;ENSP00000360662;ENSP00000379349;ENSP00000483881;	23394
Homo_sapiens	SPIB	ENSG00000269404	ETS	ENSP00000391877;ENSP00000471921;	6689
Homo_sapiens	BCL11B	ENSG00000127152	zf-C2H2	ENSP00000387419;ENSP00000280435;ENSP00000349723;	64919
Homo_sapiens	ZNF513	ENSG00000163795	zf-C2H2	ENSP00000318373;ENSP00000384874;	130557
Homo_sapiens	NEUROD6	ENSG00000164600	bHLH	ENSP00000297142;	63974
Homo_sapiens	SRF	ENSG00000112658	SRF	ENSP00000265354;	6722
Homo_sapiens	TBXT	ENSG00000164458	T-box	ENSP00000355836;ENSP00000296946;ENSP00000355841;ENSP00000453512;	6862
Homo_sapiens	HOXD9	ENSG00000128709	Homeobox	ENSP00000249499;	3235
Homo_sapiens	ZBTB47	ENSG00000114853	ZBTB	ENSP00000420968;ENSP00000232974;ENSP00000232974;	92999
Homo_sapiens	ZNF22	ENSG00000165512	zf-C2H2	ENSP00000298299;	7570
Homo_sapiens	NFXL1	ENSG00000170448	zf-NF-X1	ENSP00000370949;ENSP00000425812;ENSP00000333113;ENSP00000422037;	152518
Homo_sapiens	ZNF543	ENSG00000178229	zf-C2H2	ENSP00000322545;	125919
Homo_sapiens	ZNF540	ENSG00000171817	zf-C2H2	ENSP00000465503;ENSP00000343768;ENSP00000324598;ENSP00000466274;ENSP00000467118;	163255
Homo_sapiens	SOX14	ENSG00000168875	HMG	ENSP00000305343;	8403
Homo_sapiens	TFAP4	ENSG00000090447	bHLH	ENSP00000459390;ENSP00000204517;	7023
Homo_sapiens	ASCL2	ENSG00000183734	bHLH	ENSP00000332293;	430
Homo_sapiens	HEY1	ENSG00000164683	bHLH	ENSP00000429705;ENSP00000346761;ENSP00000338272;	23462
Homo_sapiens	EBF3	ENSG00000108001	COE	ENSP00000347463;ENSP00000387543;ENSP00000357637;	253738
Homo_sapiens	XBP1	ENSG00000100219	TF_bZIP	ENSP00000216037;ENSP00000481170;ENSP00000343155;ENSP00000385162;ENSP00000384295;	7494
Homo_sapiens	ZNF562	ENSG00000171466	zf-C2H2	ENSP00000464716;ENSP00000410734;ENSP00000293648;	54811
Homo_sapiens	PROP1	ENSG00000175325	Homeobox	ENSP00000311290;	5626
Homo_sapiens	CDX4	ENSG00000131264	Homeobox	ENSP00000362613;	1046
Homo_sapiens	SOX10	ENSG00000100146	HMG	ENSP00000354130;ENSP00000399777;ENSP00000380093;ENSP00000414853;	6663
Homo_sapiens	BORCS8-MEF2B	ENSG00000064489	SRF	ENSP00000390762;ENSP00000454967;	4207
Homo_sapiens	ZNF211	ENSG00000121417	zf-C2H2	ENSP00000240731;ENSP00000339562;ENSP00000299871;ENSP00000442601;ENSP00000254182;ENSP00000384436;ENSP00000375584;	10520
Homo_sapiens	ZNF266	ENSG00000174652	zf-C2H2	ENSP00000466714;ENSP00000467151;ENSP00000468491;ENSP00000467315;ENSP00000467403;	10781
Homo_sapiens	ZNF580	ENSG00000213015	zf-C2H2	ENSP00000446126;ENSP00000320050;ENSP00000443957;	51157
Homo_sapiens	OVOL3	ENSG00000105261	zf-C2H2	ENSP00000487603;ENSP00000465620;	728361
Homo_sapiens	ZNF391	ENSG00000124613	zf-C2H2	ENSP00000419498;ENSP00000244576;	346157
Homo_sapiens	ATOH1	ENSG00000172238	bHLH	ENSP00000302216;	474
Homo_sapiens	ATF5	ENSG00000169136	TF_bZIP	ENSP00000470633;ENSP00000396954;	22809
Homo_sapiens	MYB	ENSG00000118513	MYB	ENSP00000432948;ENSP00000432877;ENSP00000434723;ENSP00000434816;ENSP00000326328;ENSP00000435578;ENSP00000437264;ENSP00000410825;ENSP00000434420;ENSP00000433844;ENSP00000477898;ENSP00000435293;ENSP00000434795;ENSP00000434639;ENSP00000356788;ENSP00000390460;ENSP00000432168;ENSP00000437081;ENSP00000403387;ENSP00000436925;ENSP00000435938;ENSP00000432851;ENSP00000436602;ENSP00000341050;ENSP00000435595…	4602
Homo_sapiens	ALX3	ENSG00000156150	Homeobox	ENSP00000358807;	257
Homo_sapiens	SP2	ENSG00000167182	zf-C2H2	ENSP00000365931;	6668
Homo_sapiens	THAP2	ENSG00000173451	THAP	ENSP00000310796;	83591
Homo_sapiens	GATA2	ENSG00000179348	zf-GATA	ENSP00000417074;ENSP00000345681;ENSP00000400259;	2624
Homo_sapiens	CDX2	ENSG00000165556	Homeobox	ENSP00000370408;	1045
Homo_sapiens	OLIG2	ENSG00000205927	bHLH	ENSP00000371794;ENSP00000331040;	10215
Homo_sapiens	SIM1	ENSG00000112246	bHLH	ENSP00000358210;ENSP00000262901;	6492
Homo_sapiens	ZNF445	ENSG00000185219	zf-C2H2	ENSP00000413073;ENSP00000379387;	353274
Homo_sapiens	YBX2	ENSG00000006047	CSD	ENSP00000007699;	51087
Homo_sapiens	ZBTB10	ENSG00000205189	ZBTB	ENSP00000368384;ENSP00000368384;ENSP00000484716;ENSP00000484716;ENSP00000416134;ENSP00000416134;ENSP00000412036;ENSP00000412036;ENSP00000387462;ENSP00000387462;	65986
Homo_sapiens	ZIK1	ENSG00000171649	zf-C2H2	ENSP00000472867;ENSP00000468937;ENSP00000438487;	284307
Homo_sapiens	ZNF611	ENSG00000213020	zf-C2H2	ENSP00000443505;ENSP00000439211;ENSP00000437616;ENSP00000322427;ENSP00000469376;ENSP00000472648;	81856
Homo_sapiens	DLX2	ENSG00000115844	Homeobox	ENSP00000234198;ENSP00000446904;	1746
Homo_sapiens	RREB1	ENSG00000124782	zf-C2H2	ENSP00000420519;ENSP00000369270;ENSP00000419511;ENSP00000369265;ENSP00000420299;ENSP00000305560;ENSP00000335574;ENSP00000483108;	6239
Homo_sapiens	GATA1	ENSG00000102145	zf-GATA	ENSP00000365853;ENSP00000365858;	2623
Homo_sapiens	BHLHA15	ENSG00000180535	bHLH	ENSP00000326391;ENSP00000476312;	168620
Homo_sapiens	SOX21	ENSG00000125285	HMG	ENSP00000366144;	11166
Homo_sapiens	MAFA	ENSG00000182759	TF_bZIP	ENSP00000328364;	389692
Homo_sapiens	PITX1	ENSG00000069011	Homeobox	ENSP00000451199;ENSP00000423624;ENSP00000427542;ENSP00000265340;ENSP00000422908;	5307
Homo_sapiens	ZNF286B	ENSG00000249459	zf-C2H2	ENSP00000461413;	729288
Homo_sapiens	TGIF2LX	ENSG00000153779	Homeobox	ENSP00000453704;ENSP00000355119;	90316
Homo_sapiens	SATB1	ENSG00000182568	CUT	ENSP00000399518;ENSP00000341024;ENSP00000399708;	6304
Homo_sapiens	SIM2	ENSG00000159263	bHLH	ENSP00000290399;	6493
Homo_sapiens	EN1	ENSG00000163064	Homeobox	ENSP00000295206;	2019
Homo_sapiens	ZNF845	ENSG00000213799	zf-C2H2	ENSP00000388311;ENSP00000470005;	91664
Homo_sapiens	DRGX	ENSG00000165606	Homeobox	ENSP00000401653;ENSP00000363254;	644168
Homo_sapiens	MAX	ENSG00000125952	bHLH	ENSP00000452197;ENSP00000452378;ENSP00000342482;ENSP00000378104;ENSP00000480127;ENSP00000451907;ENSP00000351175;ENSP00000450818;ENSP00000452286;ENSP00000284165;ENSP00000246163;ENSP00000351490;	4149
Homo_sapiens	ZNF696	ENSG00000185730	zf-C2H2	ENSP00000427857;ENSP00000328515;	79943
Homo_sapiens	ZNF521	ENSG00000198795	zf-C2H2	ENSP00000463000;ENSP00000464415;ENSP00000382352;ENSP00000463748;ENSP00000440768;ENSP00000462724;ENSP00000354794;	25925
Homo_sapiens	ZFP62	ENSG00000196670	zf-C2H2	ENSP00000423820;ENSP00000426193;ENSP00000422987;	643836
Homo_sapiens	GLI3	ENSG00000106571	zf-C2H2	ENSP00000379258;ENSP00000496377;	2737
Homo_sapiens	ZBTB8A	ENSG00000160062	ZBTB	ENSP00000317561;ENSP00000317561;ENSP00000362609;ENSP00000362609;	653121
Homo_sapiens	ZNF791	ENSG00000173875	zf-C2H2	ENSP00000342974;ENSP00000471179;	163049
Homo_sapiens	ZFP42	ENSG00000179059	zf-C2H2	ENSP00000483363;ENSP00000317686;ENSP00000424662;	132625
Homo_sapiens	TGIF1	ENSG00000177426	Homeobox	ENSP00000339631;ENSP00000450025;ENSP00000383031;ENSP00000327959;ENSP00000385206;ENSP00000449287;ENSP00000449973;ENSP00000446838;ENSP00000384970;ENSP00000447747;ENSP00000449501;ENSP00000449531;ENSP00000448121;ENSP00000384133;ENSP00000449580;ENSP00000483499;ENSP00000449722;ENSP00000343969;ENSP00000448934;	7050
Homo_sapiens	ZNF557	ENSG00000130544	zf-C2H2	ENSP00000404065;ENSP00000252840;	79230
Homo_sapiens	MEIS3	ENSG00000105419	Homeobox	ENSP00000454073;ENSP00000475941;ENSP00000333552;ENSP00000453307;ENSP00000452854;ENSP00000453934;ENSP00000388667;ENSP00000453757;	56917
Homo_sapiens	ZNF565	ENSG00000196357	zf-C2H2	ENSP00000306869;ENSP00000347234;ENSP00000465906;ENSP00000376013;	147929
Homo_sapiens	AC002310.5	ENSG00000261459	zf-C2H2	ENSP00000454241;	-
Homo_sapiens	DLX1	ENSG00000144355	Homeobox	ENSP00000354478;ENSP00000448827;ENSP00000354865;	1745
Homo_sapiens	OLIG1	ENSG00000184221	bHLH	ENSP00000371785;	116448
Homo_sapiens	GCFC2	ENSG00000005436	GCFC	ENSP00000318690;ENSP00000386552;	6936
Homo_sapiens	ZNF124	ENSG00000196418	zf-C2H2	ENSP00000440365;ENSP00000340749;	7678
Homo_sapiens	ZBTB5	ENSG00000168795	ZBTB	ENSP00000307604;ENSP00000307604;	9925
Homo_sapiens	ZNF554	ENSG00000172006	zf-C2H2	ENSP00000321132;	115196
Homo_sapiens	ZBTB38	ENSG00000177311	ZBTB	ENSP00000406955;ENSP00000406955;ENSP00000424254;ENSP00000424254;ENSP00000426387;ENSP00000426387;ENSP00000490370;ENSP00000422894;ENSP00000426288;ENSP00000490041;ENSP00000372635;ENSP00000425705;ENSP00000422757;ENSP00000421037;	253461
Homo_sapiens	ZNF600	ENSG00000189190	zf-C2H2	ENSP00000344791;	162966
Homo_sapiens	BSX	ENSG00000188909	Homeobox	ENSP00000344285;	390259
Homo_sapiens	BHLHE41	ENSG00000123095	bHLH	ENSP00000242728;	79365
Homo_sapiens	ZSCAN23	ENSG00000187987	zf-C2H2	ENSP00000289788;	222696
Homo_sapiens	HOXA1	ENSG00000105991	Homeobox	ENSP00000494260;ENSP00000343246;	3198
Homo_sapiens	MLX	ENSG00000108788	bHLH	ENSP00000464697;ENSP00000246912;ENSP00000416627;ENSP00000320913;	6945
Homo_sapiens	TSC22D1	ENSG00000102804	TSC22	ENSP00000481585;ENSP00000261489;ENSP00000483407;ENSP00000397435;	8848
Homo_sapiens	EGR4	ENSG00000135625	zf-C2H2	ENSP00000445626;ENSP00000419687;	1961
Homo_sapiens	DUXA	ENSG00000258873	Homeobox	ENSP00000452398;	503835
Homo_sapiens	ZNF493	ENSG00000196268	zf-C2H2	ENSP00000376110;ENSP00000347691;	284443
Homo_sapiens	CREBZF	ENSG00000137504	TF_bZIP	ENSP00000434281;ENSP00000260058;ENSP00000433459;ENSP00000435762;	58487
Homo_sapiens	PAX1	ENSG00000125813	PAX	ENSP00000481334;ENSP00000410355;ENSP00000381499;	5075
Homo_sapiens	THAP11	ENSG00000168286	THAP	ENSP00000304689;	57215
Homo_sapiens	ARID4A	ENSG00000032219	ARID	ENSP00000344556;ENSP00000397368;ENSP00000378597;ENSP00000416053;ENSP00000347602;	5926
Homo_sapiens	ZSCAN22	ENSG00000182318	zf-C2H2	ENSP00000332433;	342945
Homo_sapiens	ZNF729	ENSG00000196350	zf-C2H2	ENSP00000469582;	100287226
Homo_sapiens	ZNF221	ENSG00000159905	zf-C2H2	ENSP00000467367;ENSP00000251269;ENSP00000467446;ENSP00000477876;	7638
Homo_sapiens	FOXN1	ENSG00000109101	Fork_head	ENSP00000464645;ENSP00000226247;	8456
Homo_sapiens	MSGN1	ENSG00000151379	bHLH	ENSP00000281047;	343930
Homo_sapiens	OTX2	ENSG00000165588	TF_Otx	ENSP00000451272;ENSP00000386185;ENSP00000343819;ENSP00000451357;ENSP00000452336;	5015
Homo_sapiens	TCF7L1	ENSG00000152284	HMG	ENSP00000282111;	83439
Homo_sapiens	THAP6	ENSG00000174796	THAP	ENSP00000422402;ENSP00000423720;ENSP00000309007;ENSP00000427651;ENSP00000370217;	152815
Homo_sapiens	IRF2	ENSG00000168310	IRF	ENSP00000425037;ENSP00000427204;ENSP00000422860;ENSP00000424552;ENSP00000377218;	3660
Homo_sapiens	TFAP2D	ENSG00000008197	AP-2	ENSP00000008391;	83741
Homo_sapiens	ZNF239	ENSG00000196793	zf-C2H2	ENSP00000363569;ENSP00000398202;ENSP00000443907;ENSP00000307774;	8187
Homo_sapiens	EBF1	ENSG00000164330	COE	ENSP00000477809;ENSP00000370029;ENSP00000322898;ENSP00000428020;	1879
Homo_sapiens	GBX1	ENSG00000164900	Homeobox	ENSP00000297537;	2636
Homo_sapiens	REST	ENSG00000084093	zf-C2H2	ENSP00000311816;ENSP00000484836;ENSP00000492813;ENSP00000490969;ENSP00000484058;ENSP00000479151;ENSP00000484206;ENSP00000481650;ENSP00000492006;	5978
Homo_sapiens	CSDE1	ENSG00000009307	CSD	ENSP00000261443;ENSP00000435185;ENSP00000481762;ENSP00000437159;ENSP00000432958;ENSP00000407724;ENSP00000351329;ENSP00000358543;ENSP00000342408;ENSP00000431297;	7812
Homo_sapiens	ZNF641	ENSG00000167528	zf-C2H2	ENSP00000437832;ENSP00000449974;ENSP00000394627;ENSP00000301042;	121274
Homo_sapiens	ZNF90	ENSG00000213988	zf-C2H2	ENSP00000410466;	7643
Homo_sapiens	FOXN3	ENSG00000053254	Fork_head	ENSP00000451135;ENSP00000452005;ENSP00000450684;ENSP00000450833;ENSP00000451024;ENSP00000451437;ENSP00000479114;ENSP00000343288;ENSP00000452227;ENSP00000261302;	1112
Homo_sapiens	ZNF385A	ENSG00000161642	zf-C2H2	ENSP00000338927;ENSP00000446913;ENSP00000377849;ENSP00000449161;	25946
Homo_sapiens	ZNF727	ENSG00000214652	zf-C2H2	ENSP00000485448;	442319
Homo_sapiens	ZNF257	ENSG00000197134	zf-C2H2	ENSP00000470209;	113835
Homo_sapiens	C11orf95	ENSG00000188070	zf-BED	ENSP00000482180;	65998
Homo_sapiens	ZNF98	ENSG00000197360	zf-C2H2	ENSP00000350418;	148198
Homo_sapiens	PPARD	ENSG00000112033	THR-like	ENSP00000353916;ENSP00000413314;ENSP00000337063;ENSP00000414372;ENSP00000310928;	5467
Homo_sapiens	ZNF223	ENSG00000178386	zf-C2H2	ENSP00000467647;ENSP00000401947;	7766
Homo_sapiens	ZNF561	ENSG00000171469	zf-C2H2	ENSP00000393074;ENSP00000392013;ENSP00000303915;	93134
Homo_sapiens	CDX1	ENSG00000113722	Homeobox	ENSP00000477928;ENSP00000231656;	1044
Homo_sapiens	ZBTB3	ENSG00000185670	ZBTB	ENSP00000378286;	79842
Homo_sapiens	TADA2B	ENSG00000173011	MYB	ENSP00000308022;	93624
Homo_sapiens	LHX2	ENSG00000106689	Homeobox	ENSP00000394978;ENSP00000476200;ENSP00000362717;	9355
Homo_sapiens	AC005324.4	ENSG00000255104	zf-C2H2	ENSP00000458062;ENSP00000408168;	-
Homo_sapiens	MEIS2	ENSG00000134138	Homeobox	ENSP00000453793;ENSP00000475899;ENSP00000380749;ENSP00000453497;ENSP00000341400;ENSP00000453390;ENSP00000404185;ENSP00000339549;ENSP00000380745;ENSP00000452693;	4212
Homo_sapiens	MLXIPL	ENSG00000009950	bHLH	ENSP00000392636;ENSP00000346629;ENSP00000406296;ENSP00000412330;ENSP00000320886;	51085
Homo_sapiens	ZNF274	ENSG00000171606	zf-C2H2	ENSP00000484810;ENSP00000321209;ENSP00000409872;ENSP00000478533;ENSP00000321187;	10782
Homo_sapiens	HOXB2	ENSG00000173917	Homeobox	ENSP00000331741;	3212
Homo_sapiens	ZNF816	ENSG00000180257	zf-C2H2	ENSP00000350295;ENSP00000403266;	125893
Homo_sapiens	GTF3A	ENSG00000122034	zf-C2H2	ENSP00000389655;ENSP00000409175;ENSP00000370532;ENSP00000491190;	2971
Homo_sapiens	NKX2-4	ENSG00000125816	Homeobox	ENSP00000345147;	644524
Homo_sapiens	ZNF134	ENSG00000213762	zf-C2H2	ENSP00000379464;	7693
Homo_sapiens	ETV2	ENSG00000105672	ETS	ENSP00000368312;ENSP00000368309;ENSP00000475089;ENSP00000385369;ENSP00000384524;ENSP00000468453;	2116
Homo_sapiens	POU2F1	ENSG00000143190	Pou	ENSP00000414660;ENSP00000356840;ENSP00000356836;ENSP00000415993;ENSP00000401217;ENSP00000441285;	5451
Homo_sapiens	SALL1	ENSG00000103449	zf-C2H2	ENSP00000251020;ENSP00000407914;ENSP00000456777;	6299
Homo_sapiens	ZNF136	ENSG00000196646	zf-C2H2	ENSP00000344162;	7695
Homo_sapiens	SP140L	ENSG00000185404	SAND	ENSP00000397911;ENSP00000243810;ENSP00000379811;ENSP00000395195;	93349
Homo_sapiens	ZNF780B	ENSG00000128000	zf-C2H2	ENSP00000221355;ENSP00000484593;ENSP00000391641;	163131
Homo_sapiens	IRF5	ENSG00000128604	IRF	ENSP00000419950;ENSP00000417454;ENSP00000419056;ENSP00000419149;ENSP00000418534;ENSP00000420274;ENSP00000249375;ENSP00000385352;ENSP00000349770;ENSP00000483292;ENSP00000417770;ENSP00000418037;ENSP00000480058;	3663
Homo_sapiens	ZNF443	ENSG00000180855	zf-C2H2	ENSP00000301547;	10224
Homo_sapiens	ETV1	ENSG00000006468	ETS	ENSP00000385686;ENSP00000411626;ENSP00000385551;ENSP00000405327;ENSP00000382293;ENSP00000384085;ENSP00000384138;ENSP00000385381;ENSP00000242066;	2115
Homo_sapiens	HMG20B	ENSG00000064961	HMG	ENSP00000328269;ENSP00000402877;ENSP00000393904;ENSP00000410924;	10362
Homo_sapiens	PGR	ENSG00000082175	ESR-like	ENSP00000481227;ENSP00000436561;ENSP00000432914;ENSP00000325120;ENSP00000482698;ENSP00000436803;ENSP00000263463;ENSP00000432352;ENSP00000487607;	5241
Homo_sapiens	MYBL2	ENSG00000101057	MYB	ENSP00000380072;ENSP00000217026;	4605
Homo_sapiens	EGR2	ENSG00000122877	zf-C2H2	ENSP00000242480;ENSP00000402040;ENSP00000387634;	1959
Homo_sapiens	ZNF397	ENSG00000186812	zf-C2H2	ENSP00000331577;	84307
Homo_sapiens	NFATC2	ENSG00000101096	RHD	ENSP00000396471;ENSP00000379330;ENSP00000360619;ENSP00000477370;ENSP00000477342;ENSP00000477142;	4773
Homo_sapiens	OTX1	ENSG00000115507	TF_Otx	ENSP00000355631;ENSP00000282549;	5013
Homo_sapiens	CREM	ENSG00000095794	TF_bZIP	ENSP00000417807;ENSP00000363860;ENSP00000409220;ENSP00000420681;ENSP00000393538;ENSP00000417165;ENSP00000420511;ENSP00000345384;ENSP00000419075;ENSP00000417460;ENSP00000418336;ENSP00000417562;ENSP00000419684;ENSP00000346804;ENSP00000363853;ENSP00000420437;ENSP00000349387;ENSP00000341875;ENSP00000419018;ENSP00000337138;ENSP00000265372;ENSP00000417327;ENSP00000344365;ENSP00000379225;ENSP00000354593…	1390
Homo_sapiens	FOXO3	ENSG00000118689	Fork_head	ENSP00000339527;ENSP00000385824;	2309
Homo_sapiens	ZBTB6	ENSG00000186130	ZBTB	ENSP00000362763;ENSP00000362763;	10773
Homo_sapiens	ZNF433	ENSG00000197647	zf-C2H2	ENSP00000448099;ENSP00000393416;ENSP00000339767;	163059
Homo_sapiens	CREB1	ENSG00000118260	TF_bZIP	ENSP00000236995;ENSP00000405539;ENSP00000387699;	1385
Homo_sapiens	POU3F4	ENSG00000196767	Pou	ENSP00000495996;ENSP00000362296;	5456
Homo_sapiens	ZNF672	ENSG00000171161	zf-C2H2	ENSP00000426199;ENSP00000421915;ENSP00000427021;	79894
Homo_sapiens	ZNF329	ENSG00000181894	zf-C2H2	ENSP00000470008;ENSP00000439527;ENSP00000470323;ENSP00000350773;	79673
Homo_sapiens	SCRT1	ENSG00000261678	zf-C2H2	ENSP00000455711;	83482
Homo_sapiens	ZNF140	ENSG00000196387	zf-C2H2	ENSP00000445411;ENSP00000347755;	7699
Homo_sapiens	ZBED6	ENSG00000257315	zf-BED	ENSP00000447879;	100381270
Homo_sapiens	ZNF765	ENSG00000196417	zf-C2H2	ENSP00000379689;	91661
Homo_sapiens	CRX	ENSG00000105392	TF_Otx	ENSP00000221996;ENSP00000445565;	1406
Homo_sapiens	ZNF853	ENSG00000236609	zf-C2H2	ENSP00000455585;	54753
Homo_sapiens	BAZ2B	ENSG00000123636	MBD	ENSP00000339670;ENSP00000376533;ENSP00000393565;ENSP00000376534;	29994
Homo_sapiens	ZNF182	ENSG00000147118	zf-C2H2	ENSP00000366142;ENSP00000380165;	7569
Homo_sapiens	ZNF467	ENSG00000181444	zf-C2H2	ENSP00000304769;	168544
Homo_sapiens	ZNF253	ENSG00000256771	zf-C2H2	ENSP00000467235;ENSP00000468720;ENSP00000347868;ENSP00000492582;	56242
Homo_sapiens	PRDM10	ENSG00000170325	zf-C2H2	ENSP00000432237;ENSP00000302669;ENSP00000431262;ENSP00000351686;ENSP00000354118;ENSP00000398431;ENSP00000435940;	56980
Homo_sapiens	ZNF333	ENSG00000160961	zf-C2H2	ENSP00000292530;	84449
Homo_sapiens	PRDM1	ENSG00000057657	zf-C2H2	ENSP00000358092;ENSP00000358085;ENSP00000358087;	639
Homo_sapiens	ZIM3	ENSG00000141946	zf-C2H2	ENSP00000269834;	114026
Homo_sapiens	GATA4	ENSG00000136574	zf-GATA	ENSP00000435043;ENSP00000435712;ENSP00000435347;ENSP00000482268;ENSP00000334458;	2626
Homo_sapiens	GLIS2	ENSG00000126603	zf-C2H2	ENSP00000395547;ENSP00000262366;	84662
Homo_sapiens	ZNF180	ENSG00000167384	zf-C2H2	ENSP00000221327;ENSP00000375818;ENSP00000468021;	7733
Homo_sapiens	ZNF366	ENSG00000178175	zf-C2H2	ENSP00000313158;	167465
Homo_sapiens	SOX18	ENSG00000203883	HMG	ENSP00000341815;	54345
Homo_sapiens	ZFP1	ENSG00000184517	zf-C2H2	ENSP00000377080;ENSP00000457044;ENSP00000333192;	162239
Homo_sapiens	ZNF517	ENSG00000197363	zf-C2H2	ENSP00000432025;ENSP00000435166;ENSP00000436103;ENSP00000353058;	340385
Homo_sapiens	HOXD10	ENSG00000128710	Homeobox	ENSP00000249501;	3236
Homo_sapiens	ZNF112	ENSG00000062370	zf-C2H2	ENSP00000337081;ENSP00000346305;	7771
Homo_sapiens	CCDC88A	ENSG00000115355	TF_bZIP	ENSP00000480931;	55704
Homo_sapiens	ZNF628	ENSG00000197483	zf-C2H2	ENSP00000469591;ENSP00000465905;ENSP00000375598;	89887
Homo_sapiens	ZNF829	ENSG00000185869	zf-C2H2	ENSP00000429266;ENSP00000428679;	374899
Homo_sapiens	TADA2A	ENSG00000276234	MYB	ENSP00000484884;ENSP00000477709;ENSP00000480446;ENSP00000478363;ENSP00000481890;ENSP00000478162;ENSP00000481091;	6871
Homo_sapiens	ASCL3	ENSG00000176009	bHLH	ENSP00000435770;	56676
Homo_sapiens	ZNF688	ENSG00000229809	zf-C2H2	ENSP00000223459;ENSP00000455227;	146542
Homo_sapiens	ZNF784	ENSG00000179922	zf-C2H2	ENSP00000320096;	147808
Homo_sapiens	MYOD1	ENSG00000129152	bHLH	ENSP00000250003;	4654
Homo_sapiens	SMAD5	ENSG00000113658	MH1	ENSP00000422954;ENSP00000425749;ENSP00000446474;ENSP00000424279;ENSP00000441954;ENSP00000426696;	4090
Homo_sapiens	GSX1	ENSG00000169840	Homeobox	ENSP00000304331;	219409
Homo_sapiens	DMBX1	ENSG00000197587	Homeobox	ENSP00000361024;ENSP00000353132;	127343
Homo_sapiens	ZNF419	ENSG00000105136	zf-C2H2	ENSP00000390916;ENSP00000346136;ENSP00000221735;ENSP00000392129;ENSP00000299860;ENSP00000388864;ENSP00000414709;	79744
Homo_sapiens	SP110	ENSG00000135899	SAND	ENSP00000375902;ENSP00000258382;ENSP00000258381;ENSP00000439558;ENSP00000351488;	3431
Homo_sapiens	SALL3	ENSG00000256463	zf-C2H2	ENSP00000461451;ENSP00000481352;ENSP00000441823;ENSP00000439975;ENSP00000458360;	27164
Homo_sapiens	BBX	ENSG00000114439	HMG	ENSP00000385530;ENSP00000319974;ENSP00000413274;ENSP00000408358;ENSP00000407662;ENSP00000408297;ENSP00000403860;ENSP00000385518;ENSP00000414673;ENSP00000406554;ENSP00000403806;ENSP00000385317;ENSP00000413320;	56987
Homo_sapiens	FEZF2	ENSG00000153266	zf-C2H2	ENSP00000418804;ENSP00000418589;ENSP00000283268;	55079
Homo_sapiens	EBF2	ENSG00000221818	COE	ENSP00000386178;ENSP00000437909;ENSP00000430241;	64641
Homo_sapiens	HMGA2	ENSG00000149948	HMGA	ENSP00000346658;ENSP00000407306;ENSP00000437747;ENSP00000384026;ENSP00000443372;ENSP00000377205;ENSP00000439317;ENSP00000377206;ENSP00000440919;ENSP00000437621;	8091
Homo_sapiens	DACH1	ENSG00000276644	DACH	ENSP00000482245;ENSP00000481551;ENSP00000482493;ENSP00000482797;	1602
Homo_sapiens	SETDB1	ENSG00000143379	MBD	ENSP00000432348;ENSP00000271640;ENSP00000357965;	9869
Homo_sapiens	VAX2	ENSG00000116035	Homeobox	ENSP00000405114;ENSP00000234392;ENSP00000495231;	25806
Homo_sapiens	MEF2D	ENSG00000116604	SRF	ENSP00000477413;ENSP00000476788;ENSP00000353803;ENSP00000357223;ENSP00000271555;	4209
Homo_sapiens	ZNF273	ENSG00000198039	zf-C2H2	ENSP00000418719;	10793
Homo_sapiens	ZNF287	ENSG00000141040	zf-C2H2	ENSP00000379168;ENSP00000379169;	57336
Homo_sapiens	ZNF37A	ENSG00000075407	zf-C2H2	ENSP00000329141;ENSP00000354377;	7587
Homo_sapiens	RAX	ENSG00000134438	Homeobox	ENSP00000334813;	30062
Homo_sapiens	OSR2	ENSG00000164920	zf-C2H2	ENSP00000429910;ENSP00000430041;ENSP00000430780;ENSP00000402862;ENSP00000430074;ENSP00000414657;ENSP00000297565;	116039
Homo_sapiens	ZNF763	ENSG00000197054	zf-C2H2	ENSP00000402017;ENSP00000465145;ENSP00000369774;	284390
Homo_sapiens	TSHZ3	ENSG00000121297	zf-C2H2	ENSP00000240587;	57616
Homo_sapiens	ZNF555	ENSG00000186300	zf-C2H2	ENSP00000467893;ENSP00000334853;	148254
Homo_sapiens	HOXC10	ENSG00000180818	Homeobox	ENSP00000307321;	3226
Homo_sapiens	TOX	ENSG00000198846	HMG	ENSP00000354842;	9760
Homo_sapiens	KLF8	ENSG00000102349	zf-C2H2	ENSP00000417303;	11279
Homo_sapiens	ZNF235	ENSG00000159917	zf-C2H2	ENSP00000291182;	9310
Homo_sapiens	ZNF746	ENSG00000181220	zf-C2H2	ENSP00000395007;ENSP00000493970;ENSP00000345140;	155061
Homo_sapiens	VAX1	ENSG00000148704	Homeobox	ENSP00000277905;ENSP00000358207;	11023
Homo_sapiens	BARX2	ENSG00000043039	Homeobox	ENSP00000281437;	8538
Homo_sapiens	ZNF311	ENSG00000197935	zf-C2H2	ENSP00000366384;	282890
Homo_sapiens	RBPJ	ENSG00000168214	CSL	ENSP00000423703;ENSP00000339699;ENSP00000340124;ENSP00000423907;ENSP00000345206;ENSP00000305815;ENSP00000347659;ENSP00000423406;ENSP00000427170;ENSP00000354528;ENSP00000421804;	3516
Homo_sapiens	PDX1	ENSG00000139515	Homeobox	ENSP00000370421;	3651
Homo_sapiens	ZXDB	ENSG00000198455	zf-C2H2	ENSP00000364023;	158586
Homo_sapiens	ZNF528	ENSG00000167555	zf-C2H2	ENSP00000353652;	84436
Homo_sapiens	BATF3	ENSG00000123685	TF_bZIP	ENSP00000243440;	55509
Homo_sapiens	HOXC12	ENSG00000123407	Homeobox	ENSP00000243103;	3228
Homo_sapiens	SMAD1	ENSG00000170365	MH1	ENSP00000426568;ENSP00000305769;ENSP00000377652;ENSP00000424959;ENSP00000424649;ENSP00000427002;ENSP00000425270;	4086
Homo_sapiens	ZFP91	ENSG00000186660	zf-C2H2	ENSP00000339030;	80829
Homo_sapiens	HMX2	ENSG00000188816	Homeobox	ENSP00000341108;	3167
Homo_sapiens	ZNF416	ENSG00000083817	zf-C2H2	ENSP00000196489;	55659
Homo_sapiens	ZNF776	ENSG00000152443	zf-C2H2	ENSP00000321812;	284309
Homo_sapiens	SPDEF	ENSG00000124664	ETS	ENSP00000363149;ENSP00000442715;	25803
Homo_sapiens	ARID3C	ENSG00000205143	ARID	ENSP00000368189;	138715
Homo_sapiens	ZNF417	ENSG00000173480	zf-C2H2	ENSP00000472272;ENSP00000311319;	147687
Homo_sapiens	FOXO1	ENSG00000150907	Fork_head	ENSP00000368880;	2308
Homo_sapiens	ZNF709	ENSG00000242852	zf-C2H2	ENSP00000380840;	163051
Homo_sapiens	FOXH1	ENSG00000160973	Fork_head	ENSP00000366534;	8928
Homo_sapiens	ZNF80	ENSG00000174255	zf-C2H2	ENSP00000417192;ENSP00000483565;ENSP00000309812;	7634
Homo_sapiens	ZNF296	ENSG00000170684	zf-C2H2	ENSP00000302770;ENSP00000479435;	162979
Homo_sapiens	ZFX	ENSG00000005889	zf-C2H2	ENSP00000438233;ENSP00000368486;ENSP00000343384;ENSP00000368475;ENSP00000304985;	7543
Homo_sapiens	SP4	ENSG00000105866	zf-C2H2	ENSP00000222584;	6671
Homo_sapiens	ID1	ENSG00000125968	bHLH	ENSP00000365280;ENSP00000365273;	3397
Homo_sapiens	ZNF701	ENSG00000167562	zf-C2H2	ENSP00000301093;ENSP00000444339;ENSP00000375662;ENSP00000479648;	55762
Homo_sapiens	CEBPB	ENSG00000172216	TF_bZIP	ENSP00000305422;	1051
Homo_sapiens	ZNF66	ENSG00000160229	zf-C2H2	ENSP00000461425;	7617
Homo_sapiens	TULP2	ENSG00000104804	Tub	ENSP00000429131;ENSP00000221399;	7288
Homo_sapiens	RFX1	ENSG00000132005	RFX	ENSP00000254325;	5989
Homo_sapiens	ZNF724	ENSG00000196081	zf-C2H2	ENSP00000413411;	440519
Homo_sapiens	GRHL2	ENSG00000083307	CP2	ENSP00000379260;ENSP00000495564;ENSP00000251808;	79977
Homo_sapiens	ZNF879	ENSG00000234284	zf-C2H2	ENSP00000414887;	345462
Homo_sapiens	TEAD3	ENSG00000007866	TEA	ENSP00000345772;ENSP00000492431;	7005
Homo_sapiens	ZNF541	ENSG00000118156	zf-C2H2	ENSP00000313258;ENSP00000375770;	84215
Homo_sapiens	ZNF610	ENSG00000167554	zf-C2H2	ENSP00000324441;ENSP00000327597;ENSP00000485001;ENSP00000383922;ENSP00000471021;ENSP00000477617;	162963
Homo_sapiens	ELK4	ENSG00000158711	ETS	ENSP00000289703;ENSP00000350681;ENSP00000483628;ENSP00000484946;	2005
Homo_sapiens	TERF1	ENSG00000147601	MYB	ENSP00000276603;ENSP00000276602;	7013
Homo_sapiens	RXRG	ENSG00000143171	RXR-like	ENSP00000482458;ENSP00000352900;	6258
Homo_sapiens	USF2	ENSG00000105698	bHLH	ENSP00000368429;ENSP00000471099;ENSP00000222305;ENSP00000470081;ENSP00000471511;ENSP00000340633;ENSP00000469364;ENSP00000471775;	7392
Homo_sapiens	ZNF35	ENSG00000169981	zf-C2H2	ENSP00000379368;	7584
Homo_sapiens	FOXO4	ENSG00000184481	Fork_head	ENSP00000363377;ENSP00000342209;	4303
Homo_sapiens	RFX2	ENSG00000087903	RFX	ENSP00000306335;ENSP00000467166;ENSP00000352076;ENSP00000467736;ENSP00000465122;	5990
Homo_sapiens	CTCFL	ENSG00000124092	zf-C2H2	ENSP00000243914;ENSP00000437999;ENSP00000413713;ENSP00000477165;ENSP00000476783;ENSP00000360239;ENSP00000477412;ENSP00000476718;ENSP00000476398;ENSP00000399061;ENSP00000477488;ENSP00000403369;ENSP00000409344;ENSP00000415329;ENSP00000476458;ENSP00000476577;ENSP00000415579;ENSP00000439998;ENSP00000392034;	140690
Homo_sapiens	AFF1	ENSG00000172493	AF-4	ENSP00000425755;ENSP00000424483;ENSP00000305689;ENSP00000378578;ENSP00000427593;ENSP00000440843;ENSP00000424766;ENSP00000424881;	4299
Homo_sapiens	ZNF775	ENSG00000196456	zf-C2H2	ENSP00000417483;ENSP00000330838;	285971
Homo_sapiens	ELF2	ENSG00000109381	ETS	ENSP00000377782;ENSP00000368867;ENSP00000426087;ENSP00000351458;ENSP00000397796;ENSP00000426997;ENSP00000368868;	1998
Homo_sapiens	ZNF32	ENSG00000169740	zf-C2H2	ENSP00000363556;ENSP00000379143;	7580
Homo_sapiens	LHX5	ENSG00000089116	Homeobox	ENSP00000261731;	64211
Homo_sapiens	SOHLH1	ENSG00000165643	bHLH	ENSP00000298466;ENSP00000404438;	402381
Homo_sapiens	NSD2	ENSG00000109685	HMG	ENSP00000372348;ENSP00000424482;ENSP00000372347;ENSP00000425761;ENSP00000399251;ENSP00000372351;ENSP00000423972;ENSP00000308780;ENSP00000421681;ENSP00000329167;ENSP00000381311;	7468
Homo_sapiens	HMGB4	ENSG00000176256	HMG	ENSP00000429214;ENSP00000430919;	127540
Homo_sapiens	ZBTB44	ENSG00000196323	ZBTB	ENSP00000433457;ENSP00000433457;ENSP00000435413;ENSP00000432558;ENSP00000434177;ENSP00000434177;ENSP00000380861;ENSP00000380861;ENSP00000436187;ENSP00000436187;ENSP00000408079;ENSP00000350574;	29068
Homo_sapiens	ZNF444	ENSG00000167685	zf-C2H2	ENSP00000468069;ENSP00000338860;	55311
Homo_sapiens	NKX2-5	ENSG00000183072	Homeobox	ENSP00000327758;	1482
Homo_sapiens	ARID5B	ENSG00000150347	ARID	ENSP00000308862;ENSP00000279873;	84159
Homo_sapiens	JDP2	ENSG00000140044	TF_bZIP	ENSP00000399587;ENSP00000409787;ENSP00000415558;ENSP00000452769;ENSP00000267569;	122953
Homo_sapiens	FOS	ENSG00000170345	TF_bZIP	ENSP00000451786;ENSP00000306245;ENSP00000452590;ENSP00000450886;ENSP00000452386;	2353
Homo_sapiens	BARX1	ENSG00000131668	Homeobox	ENSP00000253968;ENSP00000385613;	56033
Homo_sapiens	LIN28B	ENSG00000187772	CSD	ENSP00000489735;ENSP00000490468;ENSP00000344401;	389421
Homo_sapiens	LHX3	ENSG00000107187	Homeobox	ENSP00000483080;ENSP00000360813;ENSP00000360811;	8022
Homo_sapiens	NRF1	ENSG00000106459	Nrf1	ENSP00000376924;ENSP00000223190;ENSP00000342351;ENSP00000376922;ENSP00000394877;ENSP00000309826;	4899
Homo_sapiens	HOXC13	ENSG00000123364	Homeobox	ENSP00000243056;	3229
Homo_sapiens	FOXS1	ENSG00000179772	Fork_head	ENSP00000365145;	2307
Homo_sapiens	DMTF1	ENSG00000135164	MYB	ENSP00000463638;ENSP00000332171;ENSP00000448775;ENSP00000412532;ENSP00000378193;ENSP00000402627;	9988
Homo_sapiens	ISL1	ENSG00000016082	Homeobox	ENSP00000230658;ENSP00000422676;	3670
Homo_sapiens	STAT3	ENSG00000168610	STAT	ENSP00000373923;ENSP00000264657;ENSP00000467000;ENSP00000467985;ENSP00000384943;	6774
Homo_sapiens	ETV6	ENSG00000139083	ETS	ENSP00000379658;ENSP00000266427;	2120
Homo_sapiens	IRX3	ENSG00000177508	Homeobox	ENSP00000331608;	79191
Homo_sapiens	ZNF627	ENSG00000198551	zf-C2H2	ENSP00000354414;	199692
Homo_sapiens	ZKSCAN5	ENSG00000196652	zf-C2H2	ENSP00000377725;ENSP00000322872;ENSP00000392104;	23660
Homo_sapiens	NFATC4	ENSG00000100968	RHD	ENSP00000451284;ENSP00000450733;ENSP00000451224;ENSP00000450590;ENSP00000451183;ENSP00000451395;ENSP00000451151;ENSP00000396788;ENSP00000452270;ENSP00000450686;ENSP00000450810;ENSP00000451502;ENSP00000452349;ENSP00000388910;ENSP00000451454;ENSP00000388668;ENSP00000450644;ENSP00000439350;ENSP00000450469;ENSP00000250373;ENSP00000452039;	4776
Homo_sapiens	ZNF212	ENSG00000170260	zf-C2H2	ENSP00000338572;	7988
Homo_sapiens	KLF5	ENSG00000102554	zf-C2H2	ENSP00000366915;ENSP00000440407;	688
Homo_sapiens	ZNF572	ENSG00000180938	zf-C2H2	ENSP00000319305;	137209
Homo_sapiens	HES1	ENSG00000114315	bHLH	ENSP00000232424;	3280
Homo_sapiens	ZNF343	ENSG00000088876	zf-C2H2	ENSP00000278772;ENSP00000482819;ENSP00000483851;	79175
Homo_sapiens	ZNF91	ENSG00000167232	zf-C2H2	ENSP00000300619;ENSP00000471709;ENSP00000380272;	7644
Homo_sapiens	THAP7	ENSG00000184436	THAP	ENSP00000382084;ENSP00000215742;	80764
Homo_sapiens	GTF2IRD2B	ENSG00000174428	GTF2I	ENSP00000480524;ENSP00000486360;ENSP00000411454;ENSP00000480037;	389524
Homo_sapiens	ONECUT1	ENSG00000169856	CUT	ENSP00000476168;ENSP00000302630;	3175
Homo_sapiens	ZNF79	ENSG00000196152	zf-C2H2	ENSP00000438418;ENSP00000478201;ENSP00000362446;ENSP00000484833;	7633
Homo_sapiens	ZSCAN5C	ENSG00000204532	zf-C2H2	ENSP00000435234;ENSP00000365443;	649137
Homo_sapiens	TRERF1	ENSG00000124496	zf-C2H2	ENSP00000346285;ENSP00000362008;ENSP00000362013;ENSP00000439689;	55809
Homo_sapiens	BATF	ENSG00000156127	TF_bZIP	ENSP00000450486;ENSP00000286639;	10538
Homo_sapiens	LHX9	ENSG00000143355	Homeobox	ENSP00000356360;ENSP00000356357;ENSP00000453064;ENSP00000356361;	56956
Homo_sapiens	TOX4	ENSG00000092203	HMG	ENSP00000393080;ENSP00000477868;	9878
Homo_sapiens	REL	ENSG00000162924	RHD	ENSP00000496299;ENSP00000295025;ENSP00000377989;	5966
Homo_sapiens	HOXD11	ENSG00000128713	Homeobox	ENSP00000249504;	3237
Homo_sapiens	ZBTB34	ENSG00000177125	ZBTB	ENSP00000362551;ENSP00000362551;ENSP00000317534;ENSP00000317534;	403341
Homo_sapiens	ATF6B	ENSG00000213676	TF_bZIP	ENSP00000364349;ENSP00000364347;	1388
Homo_sapiens	FOXD4L6	ENSG00000273514	Fork_head	ENSP00000484875;	653404
Homo_sapiens	ELK3	ENSG00000111145	ETS	ENSP00000447857;ENSP00000446806;ENSP00000228741;ENSP00000449430;	2004
Homo_sapiens	ZNF559	ENSG00000188321	zf-C2H2	ENSP00000468153;ENSP00000474719;ENSP00000474760;ENSP00000377461;	84527
Homo_sapiens	GSC2	ENSG00000063515	Homeobox	ENSP00000086933;	2928
Homo_sapiens	ONECUT3	ENSG00000205922	CUT	ENSP00000371786;	390874
Homo_sapiens	ARNT	ENSG00000143437	bHLH	ENSP00000346372;ENSP00000423851;ENSP00000351407;ENSP00000427571;ENSP00000425899;	405
Homo_sapiens	ETV4	ENSG00000175832	ETS	ENSP00000465718;ENSP00000377273;ENSP00000441749;ENSP00000321835;ENSP00000468636;ENSP00000440023;ENSP00000443846;	2118
Homo_sapiens	ZNF792	ENSG00000180884	zf-C2H2	ENSP00000385099;ENSP00000474130;	126375
Homo_sapiens	IRF1	ENSG00000125347	IRF	ENSP00000480887;ENSP00000405655;ENSP00000473661;ENSP00000392455;ENSP00000384406;ENSP00000245414;ENSP00000396318;	3659
Homo_sapiens	NFATC3	ENSG00000072736	RHD	ENSP00000456120;ENSP00000331324;ENSP00000300659;ENSP00000264008;ENSP00000456379;ENSP00000460533;	4775
Homo_sapiens	PAX2	ENSG00000075891	PAX	ENSP00000396259;ENSP00000355069;ENSP00000452489;ENSP00000347385;ENSP00000398652;ENSP00000359319;	5076
Homo_sapiens	ZNF222	ENSG00000159885	zf-C2H2	ENSP00000187879;ENSP00000375822;	7673
Homo_sapiens	KLF4	ENSG00000136826	zf-C2H2	ENSP00000363804;ENSP00000483629;	9314
Homo_sapiens	TSC22D3	ENSG00000157514	TSC22	ENSP00000361466;ENSP00000425414;ENSP00000361457;ENSP00000427427;ENSP00000361458;ENSP00000361459;ENSP00000421016;ENSP00000314655;ENSP00000361474;	1831
Homo_sapiens	ZNF229	ENSG00000278318	zf-C2H2	ENSP00000479884;ENSP00000479807;	7772
Homo_sapiens	TFEC	ENSG00000105967	bHLH	ENSP00000318676;ENSP00000265440;ENSP00000387650;ENSP00000377125;ENSP00000417432;	22797
Homo_sapiens	ZNF668	ENSG00000167394	zf-C2H2	ENSP00000440149;ENSP00000441349;ENSP00000416853;ENSP00000378434;ENSP00000442573;ENSP00000300849;ENSP00000403975;	79759
Homo_sapiens	HOXD1	ENSG00000128645	Homeobox	ENSP00000328598;	3231
Homo_sapiens	ASCL1	ENSG00000139352	bHLH	ENSP00000266744;	429
Homo_sapiens	RCOR3	ENSG00000117625	MYB	ENSP00000355972;ENSP00000432779;ENSP00000437048;ENSP00000355973;ENSP00000436838;ENSP00000398558;ENSP00000413929;	55758
Homo_sapiens	ZNF790	ENSG00000197863	zf-C2H2	ENSP00000480834;ENSP00000480764;ENSP00000478852;ENSP00000349161;	388536
Homo_sapiens	ZNF605	ENSG00000196458	zf-C2H2	ENSP00000353314;ENSP00000376135;	100289635
Homo_sapiens	POU4F3	ENSG00000091010	Pou	ENSP00000230732;ENSP00000495718;	5459
Homo_sapiens	ESRRA	ENSG00000173153	ESR-like	ENSP00000441970;ENSP00000384851;ENSP00000000442;ENSP00000385971;ENSP00000444710;ENSP00000439896;	2101
Homo_sapiens	GLIS3	ENSG00000107249	zf-C2H2	ENSP00000371398;ENSP00000325494;	169792
Homo_sapiens	ZNF519	ENSG00000175322	zf-C2H2	ENSP00000464872;	162655
Homo_sapiens	ZNF354A	ENSG00000169131	zf-C2H2	ENSP00000337122;	6940
Homo_sapiens	ZNF214	ENSG00000149050	zf-C2H2	ENSP00000445373;ENSP00000278314;	7761
Homo_sapiens	AC019117.3	ENSG00000283321	bHLH	ENSP00000490530;	-
Homo_sapiens	ZFAT	ENSG00000066827	zf-C2H2	ENSP00000429930;ENSP00000367069;ENSP00000428483;ENSP00000427831;ENSP00000394501;ENSP00000430924;ENSP00000427879;ENSP00000429091;	57623
Homo_sapiens	ZKSCAN4	ENSG00000187626	zf-C2H2	ENSP00000366509;	387032
Homo_sapiens	AC008770.2	ENSG00000267179	zf-C2H2	ENSP00000467286;	-
Homo_sapiens	FOXA1	ENSG00000129514	Fork_head	ENSP00000250448;	3169
Homo_sapiens	ZNF658	ENSG00000274349	zf-C2H2	ENSP00000479295;ENSP00000482447;ENSP00000482540;ENSP00000480919;	26149
Homo_sapiens	PITX3	ENSG00000107859	Homeobox	ENSP00000359019;ENSP00000439383;	5309
Homo_sapiens	ZNF496	ENSG00000162714	zf-C2H2	ENSP00000294753;ENSP00000473324;	84838
Homo_sapiens	ZNF248	ENSG00000198105	zf-C2H2	ENSP00000349882;ENSP00000379208;	57209
Homo_sapiens	KLF10	ENSG00000155090	zf-C2H2	ENSP00000379222;ENSP00000285407;	7071
Homo_sapiens	BCL6	ENSG00000113916	ZBTB	ENSP00000413122;ENSP00000413122;ENSP00000479784;ENSP00000479784;ENSP00000232014;ENSP00000232014;ENSP00000384371;ENSP00000384371;	604
Homo_sapiens	HKR1	ENSG00000181666	zf-C2H2	ENSP00000438261;ENSP00000466467;ENSP00000315505;ENSP00000375994;ENSP00000467562;ENSP00000437774;	284459
Homo_sapiens	TCF7L2	ENSG00000148737	HMG	ENSP00000435694;ENSP00000348274;ENSP00000440547;ENSP00000344823;ENSP00000443883;ENSP00000487507;ENSP00000277945;ENSP00000444972;ENSP00000446172;ENSP00000446238;ENSP00000358402;ENSP00000490260;ENSP00000347949;ENSP00000443626;ENSP00000358404;ENSP00000486891;ENSP00000358393;	6934
Homo_sapiens	MAEL	ENSG00000143194	HMG	ENSP00000356846;	84944
Homo_sapiens	NR1H4	ENSG00000012504	THR-like	ENSP00000315442;ENSP00000447149;ENSP00000448978;ENSP00000448506;ENSP00000376712;ENSP00000188403;	9971
Homo_sapiens	POU5F1B	ENSG00000212993	Pou	ENSP00000495779;ENSP00000419298;	5462
Homo_sapiens	ZNF316	ENSG00000205903	zf-C2H2	ENSP00000477706;	100131017
Homo_sapiens	POU2F2	ENSG00000028277	Pou	ENSP00000452930;ENSP00000471890;ENSP00000453255;ENSP00000475664;ENSP00000431603;ENSP00000476062;ENSP00000454179;ENSP00000339369;ENSP00000436988;ENSP00000373992;ENSP00000437224;	5452
Homo_sapiens	ZNF432	ENSG00000256087	zf-C2H2	ENSP00000221315;ENSP00000470488;	9668
Homo_sapiens	HSF5	ENSG00000176160	HSF	ENSP00000313243;	124535
Homo_sapiens	ZNF382	ENSG00000161298	zf-C2H2	ENSP00000389722;ENSP00000410113;ENSP00000407593;ENSP00000492867;ENSP00000292928;	84911
Homo_sapiens	ZNF507	ENSG00000168813	zf-C2H2	ENSP00000441549;ENSP00000312277;ENSP00000348162;	22847
Homo_sapiens	MYCL	ENSG00000116990	bHLH	ENSP00000380494;ENSP00000361903;	4610
Homo_sapiens	SNAI1	ENSG00000124216	zf-C2H2	ENSP00000244050;	6615
Homo_sapiens	NKX6-3	ENSG00000165066	Homeobox	ENSP00000428361;	157848
Homo_sapiens	SREBF2	ENSG00000198911	bHLH	ENSP00000395728;ENSP00000484441;ENSP00000354476;	6721
Homo_sapiens	ZNF347	ENSG00000197937	zf-C2H2	ENSP00000471712;ENSP00000405218;ENSP00000334146;	84671
Homo_sapiens	ZNF281	ENSG00000162702	zf-C2H2	ENSP00000294740;ENSP00000356321;ENSP00000356322;	23528
Homo_sapiens	BNC2	ENSG00000173068	zf-C2H2	ENSP00000370047;ENSP00000431516;ENSP00000370042;ENSP00000444640;ENSP00000408370;	54796
Homo_sapiens	HOXA10	ENSG00000253293	Homeobox	ENSP00000379633;ENSP00000283921;	3206
Homo_sapiens	SOX4	ENSG00000124766	HMG	ENSP00000244745;	6659
Homo_sapiens	SPI1	ENSG00000066336	ETS	ENSP00000227163;ENSP00000367799;	6688
Homo_sapiens	ZFP90	ENSG00000184939	zf-C2H2	ENSP00000460547;ENSP00000381304;ENSP00000454418;	146198
Homo_sapiens	ZNF23	ENSG00000167377	zf-C2H2	ENSP00000377171;ENSP00000349796;ENSP00000387673;ENSP00000462429;	7571
Homo_sapiens	SOX11	ENSG00000176887	HMG	ENSP00000322568;	6664
Homo_sapiens	MIS18BP1	ENSG00000129534	MYB	ENSP00000309790;	55320
Homo_sapiens	HLX	ENSG00000136630	Homeobox	ENSP00000408248;ENSP00000355870;	3142
Homo_sapiens	ZNF85	ENSG00000105750	zf-C2H2	ENSP00000471588;ENSP00000342340;ENSP00000469673;ENSP00000329793;ENSP00000472145;ENSP00000470667;ENSP00000473059;	7639
Homo_sapiens	ZNF799	ENSG00000196466	zf-C2H2	ENSP00000415278;ENSP00000411084;	90576
Homo_sapiens	MEF2C	ENSG00000081189	SRF	ENSP00000422390;ENSP00000389610;ENSP00000489865;ENSP00000486554;ENSP00000487430;ENSP00000490473;ENSP00000426465;ENSP00000427163;ENSP00000485972;ENSP00000423826;ENSP00000487538;ENSP00000427286;ENSP00000490354;ENSP00000421925;ENSP00000424606;ENSP00000426665;ENSP00000490525;ENSP00000487184;ENSP00000425636;ENSP00000426442;ENSP00000424331;ENSP00000340874;ENSP00000490241;ENSP00000487311;ENSP00000423597…	4208
Homo_sapiens	PRDM16	ENSG00000142611	zf-C2H2	ENSP00000426975;ENSP00000425796;ENSP00000367643;ENSP00000270722;ENSP00000421400;	63976
Homo_sapiens	ZNF408	ENSG00000175213	zf-C2H2	ENSP00000309606;	79797
Homo_sapiens	ZNF200	ENSG00000010539	zf-C2H2	ENSP00000395723;ENSP00000380080;ENSP00000405786;ENSP00000458508;ENSP00000380077;ENSP00000380079;	7752
Homo_sapiens	ZNF883	ENSG00000285447	zf-C2H2	ENSP00000490059;	169834
Homo_sapiens	ZNF526	ENSG00000167625	zf-C2H2	ENSP00000301215;	116115
Homo_sapiens	DBP	ENSG00000105516	TF_bZIP	ENSP00000469426;ENSP00000222122;ENSP00000471220;	1628
Homo_sapiens	ZNF473	ENSG00000142528	zf-C2H2	ENSP00000375697;ENSP00000388961;ENSP00000270617;ENSP00000472808;	25888
Homo_sapiens	ZNF551	ENSG00000204519	zf-C2H2	ENSP00000472674;ENSP00000282296;	90233
Homo_sapiens	IKZF2	ENSG00000030419	zf-C2H2	ENSP00000342876;ENSP00000396253;ENSP00000412869;ENSP00000363439;ENSP00000395203;ENSP00000410447;	22807
Homo_sapiens	E4F1	ENSG00000167967	zf-C2H2	ENSP00000301727;ENSP00000457672;ENSP00000454652;ENSP00000456760;	1877
Homo_sapiens	OTP	ENSG00000171540	Homeobox	ENSP00000302814;	23440
Homo_sapiens	ZNF800	ENSG00000048405	zf-C2H2	ENSP00000376989;ENSP00000265827;ENSP00000376988;	168850
Homo_sapiens	FERD3L	ENSG00000146618	bHLH	ENSP00000275461;	222894
Homo_sapiens	ZNF865	ENSG00000261221	zf-C2H2	ENSP00000457715;	100507290
Homo_sapiens	ZNF707	ENSG00000181135	zf-C2H2	ENSP00000436212;ENSP00000351482;ENSP00000495224;ENSP00000413215;ENSP00000436250;	101928160
Homo_sapiens	ZNF606	ENSG00000166704	zf-C2H2	ENSP00000343617;ENSP00000446972;	80095
Homo_sapiens	SOX8	ENSG00000005513	HMG	ENSP00000293894;	30812
Homo_sapiens	GCM1	ENSG00000137270	GCM	ENSP00000259803;	8521
Homo_sapiens	BCL6B	ENSG00000161940	ZBTB	ENSP00000445010;ENSP00000293805;ENSP00000293805;	255877
Homo_sapiens	HEYL	ENSG00000163909	bHLH	ENSP00000361943;	26508
Homo_sapiens	SALL4	ENSG00000101115	zf-C2H2	ENSP00000379319;ENSP00000217086;ENSP00000360594;	57167
Homo_sapiens	ZNF18	ENSG00000154957	zf-C2H2	ENSP00000462383;ENSP00000462296;ENSP00000463471;ENSP00000315664;ENSP00000391376;	7566
Homo_sapiens	ZSCAN5B	ENSG00000197213	zf-C2H2	ENSP00000466072;ENSP00000351883;	342933
Homo_sapiens	MTA1	ENSG00000182979	zf-GATA	ENSP00000394106;ENSP00000333633;ENSP00000385702;ENSP00000384180;ENSP00000393438;	9112
Homo_sapiens	NR6A1	ENSG00000148200	GCNF-like	ENSP00000420587;ENSP00000341135;ENSP00000362686;ENSP00000413701;ENSP00000420267;	2649
Homo_sapiens	JUN	ENSG00000177606	TF_bZIP	ENSP00000360266;	3725
Homo_sapiens	ZNF141	ENSG00000131127	zf-C2H2	ENSP00000240499;	7700
Homo_sapiens	NFX1	ENSG00000086102	zf-NF-X1	ENSP00000368856;ENSP00000317695;	4799
Homo_sapiens	ARX	ENSG00000004848	Homeobox	ENSP00000368332;	170302
Homo_sapiens	PEG3	ENSG00000198300	zf-C2H2	ENSP00000326581;ENSP00000472395;ENSP00000472402;ENSP00000470467;ENSP00000473190;ENSP00000469486;	5178
Homo_sapiens	RARB	ENSG00000077092	THR-like	ENSP00000332296;ENSP00000373282;ENSP00000391391;ENSP00000398840;	5915
Homo_sapiens	NCOR2	ENSG00000196498	MYB	ENSP00000405367;ENSP00000402808;ENSP00000384202;ENSP00000348551;ENSP00000385618;ENSP00000400281;ENSP00000384018;ENSP00000408247;	9612
Homo_sapiens	UBTFL1	ENSG00000255009	HMG	ENSP00000485108;	642623
Homo_sapiens	ZNF331	ENSG00000130844	zf-C2H2	ENSP00000393817;ENSP00000421014;ENSP00000421728;ENSP00000422471;ENSP00000427532;ENSP00000253144;ENSP00000427439;ENSP00000393336;ENSP00000423156;	55422
Homo_sapiens	ZNF778	ENSG00000170100	zf-C2H2	ENSP00000305203;ENSP00000481538;ENSP00000405289;	197320
Homo_sapiens	NRL	ENSG00000129535	TF_bZIP	ENSP00000380193;ENSP00000454062;ENSP00000380191;ENSP00000452966;ENSP00000380197;	4901
Homo_sapiens	MYOG	ENSG00000122180	bHLH	ENSP00000241651;	4656
Homo_sapiens	NOTO	ENSG00000214513	Homeobox	ENSP00000381486;	344022
Homo_sapiens	ZNF205	ENSG00000122386	zf-C2H2	ENSP00000371627;ENSP00000219091;ENSP00000460890;ENSP00000480401;	7755
Homo_sapiens	LEF1	ENSG00000138795	HMG	ENSP00000369284;ENSP00000406176;ENSP00000422840;ENSP00000265165;	51176
Homo_sapiens	ZNF529	ENSG00000186020	zf-C2H2	ENSP00000465578;ENSP00000465917;ENSP00000468594;ENSP00000334695;	57711
Homo_sapiens	HOXA2	ENSG00000105996	Homeobox	ENSP00000222718;	3199
Homo_sapiens	ZNF148	ENSG00000163848	zf-C2H2	ENSP00000420448;ENSP00000353863;ENSP00000419322;ENSP00000420335;ENSP00000420102;	7707
Homo_sapiens	SMARCC1	ENSG00000173473	MYB	ENSP00000254480;	6599
Homo_sapiens	ZNF322	ENSG00000181315	zf-C2H2	ENSP00000478899;ENSP00000482607;ENSP00000483223;ENSP00000418897;ENSP00000419728;	79692
Homo_sapiens	TAL2	ENSG00000186051	bHLH	ENSP00000334547;	6887
Homo_sapiens	EMX2	ENSG00000170370	Homeobox	ENSP00000450962;	2018
Homo_sapiens	KLF2	ENSG00000127528	zf-C2H2	ENSP00000248071;	10365
Homo_sapiens	ZBTB22	ENSG00000236104	ZBTB	ENSP00000407545;ENSP00000407545;ENSP00000404403;ENSP00000413172;	9278
Homo_sapiens	ZNF550	ENSG00000251369	zf-C2H2	ENSP00000422344;ENSP00000469537;ENSP00000469679;ENSP00000446224;ENSP00000469580;ENSP00000445978;	162972
Homo_sapiens	ZFP3	ENSG00000180787	zf-C2H2	ENSP00000320347;	124961
Homo_sapiens	ZNF597	ENSG00000167981	zf-C2H2	ENSP00000301744;	146434
Homo_sapiens	PBX4	ENSG00000105717	Homeobox	ENSP00000251203;	80714
Homo_sapiens	ZNF652	ENSG00000198740	zf-C2H2	ENSP00000354686;ENSP00000424848;ENSP00000416305;	22834
Homo_sapiens	CSDC2	ENSG00000172346	CSD	ENSP00000417127;ENSP00000302485;	27254
Homo_sapiens	TPRX1	ENSG00000178928	Homeobox	ENSP00000438832;	284355
Homo_sapiens	ZFHX3	ENSG00000140836	Homeobox	ENSP00000493252;ENSP00000268489;ENSP00000438926;	463
Homo_sapiens	ZNF358	ENSG00000198816	zf-C2H2	ENSP00000472777;ENSP00000472305;	140467
Homo_sapiens	FOXD1	ENSG00000251493	Fork_head	ENSP00000481581;	2297
Homo_sapiens	STAT2	ENSG00000170581	STAT	ENSP00000315768;ENSP00000387354;ENSP00000450751;	6773
Homo_sapiens	ZNF431	ENSG00000196705	zf-C2H2	ENSP00000308578;ENSP00000471876;	170959
Homo_sapiens	SREBF1	ENSG00000072310	bHLH	ENSP00000411516;ENSP00000379100;ENSP00000379106;ENSP00000261646;ENSP00000348069;	6720
Homo_sapiens	ZNF69	ENSG00000198429	zf-C2H2	ENSP00000402985;	7620
Homo_sapiens	FOXB2	ENSG00000204612	Fork_head	ENSP00000365898;	442425
Homo_sapiens	MIER1	ENSG00000198160	MYB	ENSP00000360053;ENSP00000350321;ENSP00000347514;ENSP00000383820;ENSP00000360055;ENSP00000360057;ENSP00000348253;ENSP00000383821;	57708
Homo_sapiens	LRRFIP2	ENSG00000093167	LRRFIP	ENSP00000338727;ENSP00000416013;ENSP00000405480;ENSP00000416364;ENSP00000413026;ENSP00000379705;ENSP00000346349;ENSP00000416907;ENSP00000391360;ENSP00000412206;ENSP00000409574;	9209
Homo_sapiens	GATA6	ENSG00000141448	zf-GATA	ENSP00000269216;ENSP00000462313;	2627
Homo_sapiens	HIVEP2	ENSG00000010818	zf-C2H2	ENSP00000356576;ENSP00000356575;ENSP00000012134;	3097
Homo_sapiens	ZNF100	ENSG00000197020	zf-C2H2	ENSP00000445201;ENSP00000476534;ENSP00000351042;	163227
Homo_sapiens	SOHLH2	ENSG00000120669	bHLH	ENSP00000369210;	54937
Homo_sapiens	ZKSCAN8	ENSG00000198315	zf-C2H2	ENSP00000402948;ENSP00000332750;	7745
Homo_sapiens	HOXC9	ENSG00000180806	Homeobox	ENSP00000423861;ENSP00000302836;	3225
Homo_sapiens	SP9	ENSG00000217236	zf-C2H2	ENSP00000378418;	100131390
Homo_sapiens	ZNF684	ENSG00000117010	zf-C2H2	ENSP00000361784;	127396
Homo_sapiens	ZNF484	ENSG00000127081	zf-C2H2	ENSP00000364646;ENSP00000378882;ENSP00000364645;ENSP00000378881;	83744
Homo_sapiens	ZNF570	ENSG00000171827	zf-C2H2	ENSP00000331540;ENSP00000467218;	148268
Homo_sapiens	ZNF251	ENSG00000198169	zf-C2H2	ENSP00000292562;	90987
Homo_sapiens	NR1H3	ENSG00000025434	THR-like	ENSP00000384745;ENSP00000385073;ENSP00000433271;ENSP00000420656;ENSP00000403696;ENSP00000412636;ENSP00000415591;ENSP00000403798;ENSP00000378793;ENSP00000432073;ENSP00000434650;ENSP00000391005;ENSP00000477707;ENSP00000385801;ENSP00000387946;	10062
Homo_sapiens	ZIC3	ENSG00000156925	zf-C2H2	ENSP00000359638;ENSP00000287538;	7547
Homo_sapiens	FEV	ENSG00000163497	ETS	ENSP00000295727;	54738
Homo_sapiens	NFYB	ENSG00000120837	NF-YB	ENSP00000448250;ENSP00000447486;ENSP00000240055;	4801
Homo_sapiens	ZNF677	ENSG00000197928	zf-C2H2	ENSP00000334394;ENSP00000469391;	342926
Homo_sapiens	HOPX	ENSG00000171476	Homeobox	ENSP00000396275;ENSP00000370654;ENSP00000422175;ENSP00000315198;ENSP00000452003;ENSP00000451794;ENSP00000424101;ENSP00000452340;ENSP00000452098;ENSP00000337330;	84525
Homo_sapiens	ZNF460	ENSG00000197714	zf-C2H2	ENSP00000446167;ENSP00000353491;	10794
Homo_sapiens	ARID3B	ENSG00000179361	ARID	ENSP00000455668;ENSP00000477878;ENSP00000343126;	10620
Homo_sapiens	ZNF581	ENSG00000171425	zf-C2H2	ENSP00000466564;ENSP00000466047;ENSP00000270451;ENSP00000466338;	51545
Homo_sapiens	GLMP	ENSG00000198715	NCU-G1	ENSP00000483691;ENSP00000479149;ENSP00000357247;ENSP00000477187;ENSP00000480936;ENSP00000477180;ENSP00000476260;ENSP00000354553;	112770
Homo_sapiens	ZNF649	ENSG00000198093	zf-C2H2	ENSP00000347043;ENSP00000468983;	65251
Homo_sapiens	NKX1-1	ENSG00000235608	Homeobox	ENSP00000407978;	54729
Homo_sapiens	ZNF469	ENSG00000225614	zf-C2H2	ENSP00000402343;ENSP00000456500;	84627
Homo_sapiens	VEZF1	ENSG00000136451	zf-C2H2	ENSP00000462337;ENSP00000258963;ENSP00000464687;	7716
Homo_sapiens	ZNF518A	ENSG00000177853	zf-C2H2	ENSP00000480280;	9849
Homo_sapiens	TFDP1	ENSG00000198176	E2F	ENSP00000364519;ENSP00000386145;ENSP00000401389;	7027
Homo_sapiens	RELA	ENSG00000173039	RHD	ENSP00000436545;ENSP00000434372;ENSP00000479572;ENSP00000435531;ENSP00000311508;ENSP00000434745;ENSP00000432922;ENSP00000433616;ENSP00000431153;ENSP00000433526;ENSP00000483705;ENSP00000433144;ENSP00000384273;ENSP00000435290;ENSP00000434098;ENSP00000437137;ENSP00000432537;	5970
Homo_sapiens	CREB3L3	ENSG00000060566	TF_bZIP	ENSP00000469355;ENSP00000472399;ENSP00000078445;	84699
Homo_sapiens	GZF1	ENSG00000125812	ZBTB	ENSP00000366250;ENSP00000366250;ENSP00000338290;	64412
Homo_sapiens	ZNF19	ENSG00000157429	zf-C2H2	ENSP00000462810;ENSP00000288177;ENSP00000458105;ENSP00000454864;	7567
Homo_sapiens	SAMD11	ENSG00000187634	SAND	ENSP00000411579;	148398
Homo_sapiens	RUNX2	ENSG00000124813	Runt	ENSP00000496517;ENSP00000495497;ENSP00000460188;ENSP00000360491;ENSP00000458178;ENSP00000485863;ENSP00000360486;ENSP00000352514;ENSP00000360493;ENSP00000420707;	860
Homo_sapiens	HSF2	ENSG00000025156	HSF	ENSP00000357440;ENSP00000400380;	3298
Homo_sapiens	CARHSP1	ENSG00000153048	CSD	ENSP00000478055;ENSP00000457864;ENSP00000480144;ENSP00000481550;ENSP00000480542;ENSP00000455284;ENSP00000455855;ENSP00000379838;ENSP00000455522;ENSP00000455016;ENSP00000311847;ENSP00000456909;ENSP00000483591;ENSP00000460812;	23589
Homo_sapiens	TFCP2L1	ENSG00000115112	CP2	ENSP00000263707;	29842
Homo_sapiens	TSHZ1	ENSG00000179981	zf-C2H2	ENSP00000464391;ENSP00000453834;ENSP00000323584;	10194
Homo_sapiens	ZNF234	ENSG00000263002	zf-C2H2	ENSP00000465011;ENSP00000400878;	10780
Homo_sapiens	ZNF43	ENSG00000198521	zf-C2H2	ENSP00000350085;ENSP00000469578;ENSP00000470275;ENSP00000469645;ENSP00000347045;	7594
Homo_sapiens	HIF3A	ENSG00000124440	bHLH	ENSP00000432809;	64344
Homo_sapiens	FOXE3	ENSG00000186790	Fork_head	ENSP00000334472;	2301
Homo_sapiens	POU5F2	ENSG00000248483	Pou	ENSP00000489796;	134187
Homo_sapiens	NOBOX	ENSG00000106410	Homeobox	ENSP00000496732;ENSP00000419457;ENSP00000419565;ENSP00000495343;	135935
Homo_sapiens	FOXR2	ENSG00000189299	Fork_head	ENSP00000427329;	139628
Homo_sapiens	ID4	ENSG00000172201	bHLH	ENSP00000367972;	3400
Homo_sapiens	ZNF93	ENSG00000184635	zf-C2H2	ENSP00000467553;ENSP00000342002;ENSP00000491147;	81931
Homo_sapiens	PTF1A	ENSG00000168267	bHLH	ENSP00000365687;	256297
Homo_sapiens	ZNF625	ENSG00000257591	zf-C2H2	ENSP00000394380;	90589
Homo_sapiens	PAX6	ENSG00000007372	PAX	ENSP00000492316;ENSP00000491862;ENSP00000492808;ENSP00000492024;ENSP00000490971;ENSP00000492129;ENSP00000491295;ENSP00000491517;ENSP00000492205;ENSP00000492658;ENSP00000368406;ENSP00000492397;ENSP00000492166;ENSP00000388132;ENSP00000368410;ENSP00000491872;ENSP00000491492;ENSP00000491210;ENSP00000397384;ENSP00000492802;ENSP00000492587;ENSP00000491324;ENSP00000491904;ENSP00000492177;ENSP00000368424…	5080
Homo_sapiens	ZNF267	ENSG00000185947	zf-C2H2	ENSP00000300870;	10308
Homo_sapiens	PAX7	ENSG00000009709	PAX	ENSP00000383502;ENSP00000403389;ENSP00000364524;	5081
Homo_sapiens	BHLHE23	ENSG00000125533	bHLH	ENSP00000480998;ENSP00000359371;	128408
Homo_sapiens	GRHL3	ENSG00000158055	CP2	ENSP00000348333;ENSP00000288955;ENSP00000354943;ENSP00000236255;	57822
Homo_sapiens	ZNF512	ENSG00000243943	zf-C2H2	ENSP00000347648;ENSP00000451572;ENSP00000407038;ENSP00000369040;ENSP00000395660;	84450
Homo_sapiens	ZFP2	ENSG00000198939	zf-C2H2	ENSP00000430531;ENSP00000430980;ENSP00000354453;	80108
Homo_sapiens	ZNF787	ENSG00000142409	zf-C2H2	ENSP00000478557;	126208
Homo_sapiens	GMEB1	ENSG00000162419	SAND	ENSP00000355186;ENSP00000294409;ENSP00000362922;	10691
Homo_sapiens	ZNF700	ENSG00000196757	zf-C2H2	ENSP00000479449;ENSP00000467996;ENSP00000254321;	90592
Homo_sapiens	SIX5	ENSG00000177045	Homeobox	ENSP00000494267;ENSP00000453239;ENSP00000316842;	147912
Homo_sapiens	HOXD8	ENSG00000175879	Homeobox	ENSP00000406045;ENSP00000315949;ENSP00000409026;ENSP00000437431;	3234
Homo_sapiens	EBF4	ENSG00000088881	COE	ENSP00000345030;ENSP00000370022;ENSP00000477023;ENSP00000405003;ENSP00000477107;	57593
Homo_sapiens	ZNF692	ENSG00000171163	zf-C2H2	ENSP00000305483;ENSP00000355427;ENSP00000433522;ENSP00000431582;ENSP00000391200;	55657
Homo_sapiens	MYT1	ENSG00000196132	zf-C2HC	ENSP00000353269;ENSP00000442412;ENSP00000327465;ENSP00000480510;	4661
Homo_sapiens	CPHXL	ENSG00000283755	Homeobox	ENSP00000491599;	105371346
Homo_sapiens	ZNF615	ENSG00000197619	zf-C2H2	ENSP00000365906;ENSP00000473089;ENSP00000375672;ENSP00000471549;ENSP00000483676;ENSP00000484711;ENSP00000471041;	284370
Homo_sapiens	NR2F1	ENSG00000175745	RXR-like	ENSP00000481517;ENSP00000325819;ENSP00000495420;ENSP00000495740;	7025
Homo_sapiens	IRF7	ENSG00000185507	IRF	ENSP00000433903;ENSP00000380700;ENSP00000380704;ENSP00000436696;ENSP00000329411;ENSP00000434607;ENSP00000380697;ENSP00000331803;ENSP00000434524;ENSP00000432403;	3665
Homo_sapiens	ZNF117	ENSG00000152926	zf-C2H2	ENSP00000479944;ENSP00000484825;ENSP00000282869;	109504726
Homo_sapiens	ZNF579	ENSG00000218891	zf-C2H2	ENSP00000320188;	163033
Homo_sapiens	ZNF556	ENSG00000172000	zf-C2H2	ENSP00000467366;ENSP00000302603;	80032
Homo_sapiens	ZNF777	ENSG00000196453	zf-C2H2	ENSP00000247930;	27153
Homo_sapiens	FOXE1	ENSG00000178919	Fork_head	ENSP00000364265;	2304
Homo_sapiens	ZNF680	ENSG00000173041	zf-C2H2	ENSP00000309330;	340252
Homo_sapiens	ZIC4	ENSG00000174963	zf-C2H2	ENSP00000417855;ENSP00000420627;ENSP00000420775;ENSP00000397695;ENSP00000372553;ENSP00000418277;ENSP00000435509;	84107
Homo_sapiens	NFYC	ENSG00000066136	NF-YC	ENSP00000436710;ENSP00000361738;ENSP00000361734;ENSP00000409219;ENSP00000396620;ENSP00000361737;ENSP00000416403;ENSP00000408867;ENSP00000408315;ENSP00000312617;ENSP00000433820;ENSP00000397647;ENSP00000433413;ENSP00000414299;ENSP00000434404;ENSP00000361736;ENSP00000404427;ENSP00000361754;	4802
Homo_sapiens	PRDM15	ENSG00000141956	zf-C2H2	ENSP00000408592;ENSP00000381556;ENSP00000396943;ENSP00000387958;ENSP00000390245;ENSP00000431410;ENSP00000269844;ENSP00000415471;	63977
Homo_sapiens	ZNF468	ENSG00000204604	zf-C2H2	ENSP00000375660;ENSP00000470381;	162967
Homo_sapiens	ID2	ENSG00000115738	bHLH	ENSP00000385465;ENSP00000379585;ENSP00000234091;	3398
Homo_sapiens	ZSCAN5A	ENSG00000131848	zf-C2H2	ENSP00000466445;ENSP00000375593;ENSP00000467631;ENSP00000467238;	79149
Homo_sapiens	ISL2	ENSG00000159556	Homeobox	ENSP00000290759;	64843
Homo_sapiens	ZNF710	ENSG00000140548	zf-C2H2	ENSP00000268154;ENSP00000453147;ENSP00000453404;	374655
Homo_sapiens	ZIC5	ENSG00000139800	zf-C2H2	ENSP00000267294;	85416
Homo_sapiens	ZBED4	ENSG00000100426	zf-BED	ENSP00000216268;	9889
Homo_sapiens	ZNF679	ENSG00000197123	zf-C2H2	ENSP00000416809;ENSP00000255746;	168417
Homo_sapiens	HMBOX1	ENSG00000147421	Homeobox	ENSP00000380516;ENSP00000475196;ENSP00000287701;ENSP00000453185;ENSP00000430059;ENSP00000453211;ENSP00000452827;ENSP00000430110;	79618
Homo_sapiens	RFX5	ENSG00000143390	RFX	ENSP00000376502;ENSP00000357864;ENSP00000390769;ENSP00000398666;ENSP00000409187;ENSP00000290524;ENSP00000389130;ENSP00000399095;ENSP00000387618;	5993
Homo_sapiens	ZNF687	ENSG00000143373	zf-C2H2	ENSP00000398821;ENSP00000336620;ENSP00000319829;	57592
Homo_sapiens	ZNF773	ENSG00000152439	zf-C2H2	ENSP00000282292;ENSP00000469416;	374928
Homo_sapiens	HOXB7	ENSG00000260027	Homeobox	ENSP00000239165;	3217
Homo_sapiens	ZNF470	ENSG00000197016	zf-C2H2	ENSP00000333223;ENSP00000375590;	388566
Homo_sapiens	HHEX	ENSG00000152804	Homeobox	ENSP00000450017;ENSP00000282728;ENSP00000447953;	3087
Homo_sapiens	ANHX	ENSG00000227059	Homeobox	ENSP00000439513;ENSP00000409950;	647589
Homo_sapiens	L3MBTL1	ENSG00000185513	zf-C2HC	ENSP00000402107;ENSP00000362226;ENSP00000362227;ENSP00000398516;ENSP00000410139;	26013
Homo_sapiens	ASCL4	ENSG00000187855	bHLH	ENSP00000345420;	121549
Homo_sapiens	ZNF480	ENSG00000198464	zf-C2H2	ENSP00000334164;ENSP00000417424;ENSP00000335670;ENSP00000471754;	147657
Homo_sapiens	FOXI3	ENSG00000214336	Fork_head	ENSP00000478384;	344167
Homo_sapiens	ZFP57	ENSG00000204644	zf-C2H2	ENSP00000366078;ENSP00000366080;ENSP00000418259;	346171
Homo_sapiens	RFX8	ENSG00000196460	RFX	ENSP00000494216;ENSP00000424661;ENSP00000422968;ENSP00000494249;	731220
Homo_sapiens	GLI4	ENSG00000250571	zf-C2H2	ENSP00000430987;ENSP00000345024;	2738
Homo_sapiens	MBD3	ENSG00000071655	MBD	ENSP00000412302;ENSP00000156825;	53615
Homo_sapiens	ZNF732	ENSG00000186777	zf-C2H2	ENSP00000478210;ENSP00000415774;	654254
Homo_sapiens	TCF12	ENSG00000140262	bHLH	ENSP00000444696;ENSP00000453264;ENSP00000388940;ENSP00000440017;ENSP00000331057;ENSP00000267811;ENSP00000453876;ENSP00000454102;ENSP00000453737;ENSP00000342459;	6938
Homo_sapiens	ELK1	ENSG00000126767	ETS	ENSP00000345585;ENSP00000366182;ENSP00000247161;	2002
Homo_sapiens	DBX1	ENSG00000109851	Homeobox	ENSP00000436881;	120237
Homo_sapiens	GFI1	ENSG00000162676	zf-C2H2	ENSP00000399719;ENSP00000294702;ENSP00000359357;	2672
Homo_sapiens	ZNF726	ENSG00000213967	zf-C2H2	ENSP00000471516;ENSP00000317125;	730087
Homo_sapiens	SIX3	ENSG00000138083	Homeobox	ENSP00000260653;	6496
Homo_sapiens	ZSCAN12	ENSG00000158691	zf-C2H2	ENSP00000380039;ENSP00000354305;	9753
Homo_sapiens	BATF2	ENSG00000168062	TF_bZIP	ENSP00000301887;ENSP00000435640;	116071
Homo_sapiens	NR5A2	ENSG00000116833	SF-like	ENSP00000236914;ENSP00000356331;ENSP00000439116;ENSP00000356326;	2494
Homo_sapiens	ZEB2	ENSG00000169554	zf-C2H2	ENSP00000454157;ENSP00000454157;ENSP00000395496;ENSP00000395496;ENSP00000490872;ENSP00000490872;ENSP00000490508;ENSP00000490508;ENSP00000386854;ENSP00000386854;ENSP00000490673;ENSP00000490673;ENSP00000394777;ENSP00000302501;ENSP00000302501;ENSP00000490723;ENSP00000490723;ENSP00000490934;ENSP00000490934;ENSP00000443792;ENSP00000443792;ENSP00000376601;ENSP00000475553;ENSP00000487174;ENSP00000487174…	9839
Homo_sapiens	GTF2I	ENSG00000263001	GTF2I	ENSP00000477837;ENSP00000460070;ENSP00000484526;ENSP00000482476;ENSP00000404240;	2969
Homo_sapiens	ZNF568	ENSG00000198453	zf-C2H2	ENSP00000466901;ENSP00000389794;ENSP00000334685;ENSP00000480246;ENSP00000399643;ENSP00000413396;ENSP00000482444;ENSP00000481819;ENSP00000394514;	374900
Homo_sapiens	ZNF217	ENSG00000171940	zf-C2H2	ENSP00000360526;ENSP00000304308;	7764
Homo_sapiens	CDC5L	ENSG00000096401	MYB	ENSP00000360532;	988
Homo_sapiens	TSC22D2	ENSG00000196428	TSC22	ENSP00000354543;ENSP00000417747;	9819
Homo_sapiens	PIAS3	ENSG00000131788	zf-MIZ	ENSP00000358304;ENSP00000376765;	10401
Homo_sapiens	IRX5	ENSG00000176842	Homeobox	ENSP00000378132;ENSP00000316250;	10265
Homo_sapiens	ERF	ENSG00000105722	ETS	ENSP00000388173;ENSP00000469274;ENSP00000468962;ENSP00000222329;	2077
Homo_sapiens	ZFP37	ENSG00000136866	zf-C2H2	ENSP00000452552;ENSP00000363344;ENSP00000451310;	7539
Homo_sapiens	ETV3	ENSG00000117036	ETS	ENSP00000357175;ENSP00000327316;	2117
Homo_sapiens	TFE3	ENSG00000068323	bHLH	ENSP00000314129;	7030
Homo_sapiens	CTCF	ENSG00000102974	zf-C2H2	ENSP00000495218;ENSP00000384707;ENSP00000494408;ENSP00000494443;ENSP00000493495;ENSP00000494538;ENSP00000494358;ENSP00000264010;ENSP00000495348;	10664
Homo_sapiens	EGR1	ENSG00000120738	zf-C2H2	ENSP00000239938;	1958
Homo_sapiens	TFDP3	ENSG00000183434	E2F	ENSP00000385461;	51270
Homo_sapiens	E2F2	ENSG00000007968	E2F	ENSP00000355249;	1870
Homo_sapiens	ZFP36L2	ENSG00000152518	zf-CCCH	ENSP00000282388;	678
Homo_sapiens	NFIC	ENSG00000141905	CTF/NFI	ENSP00000342194;ENSP00000396843;ENSP00000466647;ENSP00000492983;ENSP00000465655;ENSP00000378543;ENSP00000465177;	4782
Homo_sapiens	LCOR	ENSG00000196233	HTH	ENSP00000348298;ENSP00000360144;ENSP00000360138;ENSP00000443431;	84458
Homo_sapiens	ZNF614	ENSG00000142556	zf-C2H2	ENSP00000270649;	80110
Homo_sapiens	RFX7	ENSG00000181827	RFX	ENSP00000453376;ENSP00000453611;ENSP00000453281;	64864
Homo_sapiens	ZBTB7A	ENSG00000178951	ZBTB	ENSP00000471865;ENSP00000471865;ENSP00000323670;ENSP00000323670;	51341
Homo_sapiens	ZNF717	ENSG00000227124	zf-C2H2	ENSP00000419377;	100131827
Homo_sapiens	ZNF34	ENSG00000196378	zf-C2H2	ENSP00000434049;ENSP00000396894;ENSP00000341528;	80778
Homo_sapiens	NR4A2	ENSG00000153234	NGFIB-like	ENSP00000386747;ENSP00000415632;ENSP00000385379;ENSP00000344479;ENSP00000394671;ENSP00000386993;ENSP00000389986;ENSP00000410952;	4929
Homo_sapiens	MEF2A	ENSG00000068305	SRF	ENSP00000452989;ENSP00000337202;ENSP00000453478;ENSP00000453095;ENSP00000453441;ENSP00000454023;ENSP00000346389;	4205
Homo_sapiens	ZNF367	ENSG00000165244	zf-C2H2	ENSP00000364405;	195828
Homo_sapiens	RCOR1	ENSG00000089902	MYB	ENSP00000262241;	23186
Homo_sapiens	ZNF264	ENSG00000083844	zf-C2H2	ENSP00000263095;ENSP00000440376;	9422
Homo_sapiens	ZNF441	ENSG00000197044	zf-C2H2	ENSP00000350576;	126068
Homo_sapiens	TWIST1	ENSG00000122691	bHLH	ENSP00000242261;ENSP00000346582;ENSP00000416986;	7291
Homo_sapiens	AFF4	ENSG00000072364	AF-4	ENSP00000265343;ENSP00000395268;ENSP00000367858;ENSP00000409069;	27125
Homo_sapiens	STAT5A	ENSG00000126561	STAT	ENSP00000465437;ENSP00000468749;ENSP00000466320;ENSP00000443107;ENSP00000341208;	6776
Homo_sapiens	ZNF888	ENSG00000213793	zf-C2H2	ENSP00000491567;	388559
Homo_sapiens	AC023509.3	ENSG00000267281	TF_bZIP	ENSP00000466174;	-
Homo_sapiens	ZNF805	ENSG00000204524	zf-C2H2	ENSP00000412999;ENSP00000365414;	390980
Homo_sapiens	ZHX3	ENSG00000174306	Homeobox	ENSP00000443783;ENSP00000454006;ENSP00000312222;ENSP00000405421;ENSP00000452965;ENSP00000415498;	23051
Homo_sapiens	ZNF584	ENSG00000171574	zf-C2H2	ENSP00000471105;ENSP00000306756;	201514
Homo_sapiens	PRRX1	ENSG00000116132	Homeobox	ENSP00000450762;ENSP00000239461;ENSP00000356734;	5396
Homo_sapiens	HOXA3	ENSG00000105997	Homeobox	ENSP00000379640;ENSP00000324884;ENSP00000484411;	3200
Homo_sapiens	E2F5	ENSG00000133740	E2F	ENSP00000398124;ENSP00000256117;ENSP00000414312;	1875
Homo_sapiens	KLF17	ENSG00000171872	zf-C2H2	ENSP00000361373;	128209
Homo_sapiens	RHOXF1	ENSG00000101883	Homeobox	ENSP00000217999;	158800
Homo_sapiens	NKX2-3	ENSG00000119919	Homeobox	ENSP00000479692;ENSP00000342828;	159296
Homo_sapiens	ZNF691	ENSG00000164011	zf-C2H2	ENSP00000361585;ENSP00000361580;ENSP00000361584;ENSP00000486871;ENSP00000361581;ENSP00000361586;ENSP00000361582;	51058
Homo_sapiens	ZSCAN31	ENSG00000235109	zf-C2H2	ENSP00000391235;ENSP00000390076;ENSP00000345339;ENSP00000407529;ENSP00000413705;ENSP00000402937;ENSP00000480254;ENSP00000380050;	64288
Homo_sapiens	ZNF337	ENSG00000130684	zf-C2H2	ENSP00000252979;ENSP00000365619;	26152
Homo_sapiens	ZNF429	ENSG00000197013	zf-C2H2	ENSP00000351280;ENSP00000479286;	353088
Homo_sapiens	YY1	ENSG00000100811	zf-C2H2	ENSP00000262238;ENSP00000452225;	7528
Homo_sapiens	ZNF76	ENSG00000065029	zf-C2H2	ENSP00000419106;ENSP00000344097;ENSP00000363064;	7629
Homo_sapiens	AC020909.1	ENSG00000142539	ETS	ENSP00000473233;	-
Homo_sapiens	ZSCAN2	ENSG00000176371	zf-C2H2	ENSP00000351257;ENSP00000445451;ENSP00000325123;ENSP00000410198;ENSP00000441855;	54993
Homo_sapiens	ZNF12	ENSG00000164631	zf-C2H2	ENSP00000384405;ENSP00000385939;ENSP00000344745;	7559
Homo_sapiens	DNAJC1	ENSG00000136770	MYB	ENSP00000366179;	64215
Homo_sapiens	ZNF585A	ENSG00000196967	zf-C2H2	ENSP00000375998;ENSP00000349440;ENSP00000292841;	199704
Homo_sapiens	ZNF385B	ENSG00000144331	zf-C2H2	ENSP00000386845;ENSP00000494328;	151126
Homo_sapiens	FOXA2	ENSG00000125798	Fork_head	ENSP00000366319;ENSP00000400341;	3170
Homo_sapiens	ZSCAN9	ENSG00000137185	zf-C2H2	ENSP00000252207;ENSP00000436166;ENSP00000404074;ENSP00000433402;	7746
Homo_sapiens	ZNF814	ENSG00000204514	zf-C2H2	ENSP00000480123;ENSP00000410545;	730051
Homo_sapiens	ZNF697	ENSG00000143067	zf-C2H2	ENSP00000396857;	90874
Homo_sapiens	ZNF462	ENSG00000148143	zf-C2H2	ENSP00000405837;	58499
Homo_sapiens	ZNF618	ENSG00000157657	zf-C2H2	ENSP00000363241;ENSP00000363239;ENSP00000395400;ENSP00000483198;ENSP00000288466;	114991
Homo_sapiens	CREB3L2	ENSG00000182158	TF_bZIP	ENSP00000329140;ENSP00000403550;	64764
Homo_sapiens	ZNF827	ENSG00000151612	zf-C2H2	ENSP00000423130;ENSP00000424541;ENSP00000421863;ENSP00000368761;	152485
Homo_sapiens	ZNF77	ENSG00000175691	zf-C2H2	ENSP00000319053;	58492
Homo_sapiens	NEUROG2	ENSG00000178403	bHLH	ENSP00000317333;	63973
Homo_sapiens	MSC	ENSG00000178860	bHLH	ENSP00000321445;	9242
Homo_sapiens	NEUROD1	ENSG00000162992	bHLH	ENSP00000295108;	4760
Homo_sapiens	ZBTB12	ENSG00000204366	ZBTB	ENSP00000364677;ENSP00000364677;	221527
Homo_sapiens	ZNF629	ENSG00000102870	zf-C2H2	ENSP00000262525;	23361
Homo_sapiens	ATOH7	ENSG00000179774	bHLH	ENSP00000362777;	220202
Homo_sapiens	KLF7	ENSG00000118263	zf-C2H2	ENSP00000387510;ENSP00000393268;ENSP00000309570;ENSP00000403284;	8609
Homo_sapiens	ZBTB48	ENSG00000204859	ZBTB	ENSP00000466390;ENSP00000366902;ENSP00000366902;ENSP00000416054;ENSP00000313416;	3104
Homo_sapiens	MESP2	ENSG00000188095	bHLH	ENSP00000342392;	145873
Homo_sapiens	FOXK1	ENSG00000164916	Fork_head	ENSP00000328720;	221937
Homo_sapiens	ZBTB41	ENSG00000177888	ZBTB	ENSP00000356375;ENSP00000356375;	360023
Homo_sapiens	NR2C2	ENSG00000177463	RXR-like	ENSP00000388387;ENSP00000413438;ENSP00000384463;ENSP00000401807;ENSP00000412473;ENSP00000320447;ENSP00000376814;ENSP00000483059;	7182
Homo_sapiens	ZNF558	ENSG00000167785	zf-C2H2	ENSP00000301475;ENSP00000471277;	148156
Homo_sapiens	RFX4	ENSG00000111783	RFX	ENSP00000444163;ENSP00000447423;ENSP00000350552;ENSP00000447735;ENSP00000376585;ENSP00000448694;	5992
Homo_sapiens	SMARCC2	ENSG00000139613	MYB	ENSP00000449396;ENSP00000267064;ENSP00000302919;ENSP00000377591;	6601
Homo_sapiens	PLAGL1	ENSG00000118495	zf-C2H2	ENSP00000356544;ENSP00000486355;ENSP00000486763;ENSP00000485907;ENSP00000356543;ENSP00000400929;ENSP00000392418;ENSP00000353734;ENSP00000400060;ENSP00000486752;ENSP00000487447;ENSP00000395960;ENSP00000346810;ENSP00000486632;	5325
Homo_sapiens	ZBTB7B	ENSG00000160685	ZBTB	ENSP00000438647;ENSP00000438647;ENSP00000357411;ENSP00000357411;ENSP00000406286;ENSP00000406286;ENSP00000292176;	51043
Homo_sapiens	ZNF425	ENSG00000204947	zf-C2H2	ENSP00000367300;	155054
Homo_sapiens	HOXB4	ENSG00000182742	Homeobox	ENSP00000328928;	3214
Homo_sapiens	ZNF500	ENSG00000103199	zf-C2H2	ENSP00000464747;ENSP00000219478;ENSP00000445714;	26048
Homo_sapiens	FOXL2	ENSG00000183770	Fork_head	ENSP00000333188;	668
Homo_sapiens	PHOX2B	ENSG00000109132	Homeobox	ENSP00000226382;	8929
Homo_sapiens	ISX	ENSG00000175329	Homeobox	ENSP00000386037;ENSP00000311492;	91464
Homo_sapiens	ZBTB21	ENSG00000173276	ZBTB	ENSP00000381512;ENSP00000381517;ENSP00000308759;ENSP00000381523;	49854
Homo_sapiens	ZNF582	ENSG00000018869	zf-C2H2	ENSP00000483414;ENSP00000465619;ENSP00000301310;	147948
Homo_sapiens	SP100	ENSG00000067066	SAND	ENSP00000343023;ENSP00000264052;ENSP00000393679;ENSP00000386427;	6672
Homo_sapiens	ZSCAN21	ENSG00000166529	zf-C2H2	ENSP00000292450;ENSP00000441212;	7589
Homo_sapiens	STAT6	ENSG00000166888	STAT	ENSP00000438451;ENSP00000401486;ENSP00000444530;ENSP00000445409;ENSP00000451742;ENSP00000491116;ENSP00000451546;ENSP00000450921;ENSP00000300134;	6778
Homo_sapiens	FOXC2	ENSG00000176692	Fork_head	ENSP00000326371;	2303
Homo_sapiens	TCF3	ENSG00000071564	bHLH	ENSP00000467508;ENSP00000396363;ENSP00000344375;ENSP00000468487;ENSP00000465510;ENSP00000262965;ENSP00000378813;ENSP00000466565;ENSP00000466952;ENSP00000468481;ENSP00000465549;ENSP00000480564;	6929
Homo_sapiens	LHX1	ENSG00000273706	Homeobox	ENSP00000477829;	3975
Homo_sapiens	ID3	ENSG00000117318	bHLH	ENSP00000363689;	3399
Homo_sapiens	ARID5A	ENSG00000196843	ARID	ENSP00000350078;ENSP00000400785;	10865
Homo_sapiens	PAX3	ENSG00000135903	PAX	ENSP00000386750;ENSP00000343052;ENSP00000375922;ENSP00000375921;ENSP00000338767;ENSP00000342092;ENSP00000258387;ENSP00000386817;	5077
Homo_sapiens	DEAF1	ENSG00000177030	SAND	ENSP00000371846;ENSP00000431563;	10522
Homo_sapiens	ZNF44	ENSG00000197857	zf-C2H2	ENSP00000377008;ENSP00000347910;ENSP00000348419;ENSP00000380850;	51710
Homo_sapiens	KLF1	ENSG00000105610	zf-C2H2	ENSP00000264834;	10661
Homo_sapiens	GATAD2B	ENSG00000143614	zf-GATA	ENSP00000489595;ENSP00000357644;ENSP00000489309;ENSP00000489184;	57459
Homo_sapiens	SIX1	ENSG00000126778	Homeobox	ENSP00000494686;ENSP00000247182;	6495
Homo_sapiens	ONECUT2	ENSG00000119547	CUT	ENSP00000419185;	9480
Homo_sapiens	ZFY	ENSG00000067646	zf-C2H2	ENSP00000372525;ENSP00000155093;ENSP00000485605;ENSP00000393908;	7544
Homo_sapiens	ATMIN	ENSG00000166454	zf-C2H2	ENSP00000464427;	23300
Homo_sapiens	NFIA	ENSG00000162599	CTF/NFI	ENSP00000360233;ENSP00000360227;ENSP00000474461;ENSP00000384523;ENSP00000360226;ENSP00000473830;ENSP00000360231;ENSP00000474806;ENSP00000360229;ENSP00000474462;ENSP00000419785;ENSP00000384680;	4774
Homo_sapiens	FOXI2	ENSG00000186766	Fork_head	ENSP00000373572;	399823
Homo_sapiens	TFCP2	ENSG00000135457	CP2	ENSP00000449280;ENSP00000447991;ENSP00000257915;ENSP00000449742;	7024
Homo_sapiens	MBD4	ENSG00000129071	MBD	ENSP00000394080;ENSP00000422327;ENSP00000249910;ENSP00000424873;	8930
Homo_sapiens	ZIC1	ENSG00000152977	zf-C2H2	ENSP00000419664;ENSP00000282928;	7545
Homo_sapiens	POU6F1	ENSG00000184271	Pou	ENSP00000330190;ENSP00000448389;	5463
Homo_sapiens	FIGLA	ENSG00000183733	bHLH	ENSP00000333097;	344018
Homo_sapiens	TFAP2E	ENSG00000116819	AP-2	ENSP00000362332;	339488
Homo_sapiens	ZNF213	ENSG00000085644	zf-C2H2	ENSP00000380087;ENSP00000459177;ENSP00000403892;ENSP00000460157;ENSP00000459293;	7760
Homo_sapiens	ZNF17	ENSG00000186272	zf-C2H2	ENSP00000302455;ENSP00000471905;	7565
Homo_sapiens	HAND1	ENSG00000113196	bHLH	ENSP00000231121;	9421
Homo_sapiens	HSFX1	ENSG00000171116	HSF	ENSP00000359444;	100506164
Homo_sapiens	FOXC1	ENSG00000054598	Fork_head	ENSP00000493906;ENSP00000370256;	2296
Homo_sapiens	PAX9	ENSG00000198807	PAX	ENSP00000355245;ENSP00000384817;	5083
Homo_sapiens	ZNF28	ENSG00000198538	zf-C2H2	ENSP00000375661;ENSP00000397693;ENSP00000412143;	7576
Homo_sapiens	MNT	ENSG00000070444	bHLH	ENSP00000174618;	4335
Homo_sapiens	NEUROD2	ENSG00000171532	bHLH	ENSP00000306754;	4761
Homo_sapiens	ZNF133	ENSG00000125846	zf-C2H2	ENSP00000346090;ENSP00000487315;ENSP00000366899;ENSP00000383945;ENSP00000485741;ENSP00000439427;ENSP00000385279;ENSP00000400897;ENSP00000442978;ENSP00000481326;	7692
Homo_sapiens	BNC1	ENSG00000169594	zf-C2H2	ENSP00000456727;ENSP00000307041;	646
Homo_sapiens	PRDM9	ENSG00000164256	zf-C2H2	ENSP00000296682;	56979
Homo_sapiens	HNF1A	ENSG00000135100	Homeobox	ENSP00000443112;ENSP00000438804;ENSP00000257555;ENSP00000476181;	6927
Homo_sapiens	ZNF653	ENSG00000161914	zf-C2H2	ENSP00000293771;ENSP00000467069;ENSP00000465166;	115950
Homo_sapiens	UNCX	ENSG00000164853	Homeobox	ENSP00000314480;	340260
Homo_sapiens	TGIF2	ENSG00000118707	Homeobox	ENSP00000362979;ENSP00000362981;ENSP00000453773;ENSP00000476174;ENSP00000452878;ENSP00000481787;	60436
Homo_sapiens	ZSCAN32	ENSG00000140987	zf-C2H2	ENSP00000483210;ENSP00000380061;ENSP00000380057;ENSP00000391787;ENSP00000302502;	54925
Homo_sapiens	ZFHX4	ENSG00000091656	Homeobox	ENSP00000430848;ENSP00000430497;	79776
Homo_sapiens	ZFP69	ENSG00000187815	zf-C2H2	ENSP00000361791;ENSP00000361790;	339559
Homo_sapiens	ETV7	ENSG00000010030	ETS	ENSP00000484485;ENSP00000341843;ENSP00000342260;ENSP00000440592;ENSP00000486712;ENSP00000362843;ENSP00000481885;ENSP00000362842;	51513
Homo_sapiens	TLX1	ENSG00000107807	Homeobox	ENSP00000359215;ENSP00000434914;	3195
Homo_sapiens	ZNF747	ENSG00000169955	zf-C2H2	ENSP00000457274;	65988
Homo_sapiens	ATF7	ENSG00000170653	TF_bZIP	ENSP00000387406;ENSP00000449938;ENSP00000399465;	11016
Homo_sapiens	ZNF74	ENSG00000185252	zf-C2H2	ENSP00000385855;ENSP00000383301;ENSP00000483077;	7625
Homo_sapiens	ETV3L	ENSG00000253831	ETS	ENSP00000430271;	440695
Homo_sapiens	FIZ1	ENSG00000179943	zf-C2H2	ENSP00000468342;ENSP00000468018;ENSP00000465131;ENSP00000221665;ENSP00000468529;	84922
Homo_sapiens	ZNF177	ENSG00000188629	zf-C2H2	ENSP00000468531;ENSP00000341497;ENSP00000415070;	7730
Homo_sapiens	ZKSCAN1	ENSG00000106261	zf-C2H2	ENSP00000443508;ENSP00000480305;ENSP00000409172;ENSP00000323148;	7586
Homo_sapiens	HOXA7	ENSG00000122592	Homeobox	ENSP00000242159;	3204
Homo_sapiens	GATA5	ENSG00000130700	zf-GATA	ENSP00000252997;	140628
Homo_sapiens	THAP3	ENSG00000041988	THAP	ENSP00000311537;ENSP00000473646;ENSP00000366854;ENSP00000464954;ENSP00000054650;	90326
Homo_sapiens	TFEB	ENSG00000112561	bHLH	ENSP00000412551;ENSP00000351742;ENSP00000383998;ENSP00000384203;ENSP00000230323;ENSP00000410391;ENSP00000362124;ENSP00000377824;ENSP00000343948;	7942
Homo_sapiens	SOX3	ENSG00000134595	HMG	ENSP00000359567;	6658
Homo_sapiens	MYSM1	ENSG00000162601	MYB	ENSP00000418734;	114803
Homo_sapiens	HEY2	ENSG00000135547	bHLH	ENSP00000357349;ENSP00000357348;	23493
Homo_sapiens	ZNF84	ENSG00000198040	zf-C2H2	ENSP00000376133;ENSP00000331465;ENSP00000437949;ENSP00000445549;ENSP00000445820;	7637
Homo_sapiens	NCOA1	ENSG00000084676	bHLH	ENSP00000288599;ENSP00000385097;ENSP00000385216;ENSP00000320940;ENSP00000379197;	8648
Homo_sapiens	SUB1	ENSG00000113387	PC4	ENSP00000265073;ENSP00000426850;ENSP00000422078;ENSP00000422806;ENSP00000427100;	10923
Homo_sapiens	ZNF723	ENSG00000268696	zf-C2H2	ENSP00000494306;	646864
Homo_sapiens	SOX13	ENSG00000143842	HMG	ENSP00000356172;ENSP00000478239;	9580
Homo_sapiens	ZBTB37	ENSG00000185278	ZBTB	ENSP00000415293;ENSP00000415293;ENSP00000356674;ENSP00000356674;ENSP00000356677;	84614
Homo_sapiens	MSX1	ENSG00000163132	Homeobox	ENSP00000372170;	4487
Homo_sapiens	ZNF564	ENSG00000249709	zf-C2H2	ENSP00000340004;	163050
Homo_sapiens	NKX2-1	ENSG00000136352	Homeobox	ENSP00000346879;ENSP00000428341;ENSP00000429519;ENSP00000429607;	7080
Homo_sapiens	ZNF292	ENSG00000188994	zf-C2H2	ENSP00000342847;ENSP00000358590;ENSP00000428857;	23036
Homo_sapiens	ZNF749	ENSG00000186230	zf-C2H2	ENSP00000333980;	388567
Homo_sapiens	LHX4	ENSG00000121454	Homeobox	ENSP00000263726;	89884
Homo_sapiens	HES2	ENSG00000069812	bHLH	ENSP00000367065;ENSP00000367068;ENSP00000465248;ENSP00000367067;ENSP00000465270;	54626
Homo_sapiens	HLF	ENSG00000108924	TF_bZIP	ENSP00000226067;ENSP00000402496;ENSP00000461455;ENSP00000460296;ENSP00000460572;	3131
Homo_sapiens	IRF9	ENSG00000213928	IRF	ENSP00000453974;ENSP00000313529;ENSP00000453540;ENSP00000454095;ENSP00000380073;ENSP00000454078;	10379
Homo_sapiens	PPARG	ENSG00000132170	THR-like	ENSP00000495840;ENSP00000380210;ENSP00000494873;ENSP00000287820;ENSP00000380207;ENSP00000494934;ENSP00000380205;ENSP00000380195;ENSP00000380224;ENSP00000380221;ENSP00000380196;ENSP00000312472;	5468
Homo_sapiens	SHOX2	ENSG00000168779	Homeobox	ENSP00000419362;ENSP00000398704;ENSP00000397099;ENSP00000374240;ENSP00000479329;	6474
Homo_sapiens	ZNF277	ENSG00000198839	zf-C2H2	ENSP00000354501;ENSP00000402292;ENSP00000390359;	11179
Homo_sapiens	ZNF878	ENSG00000257446	zf-C2H2	ENSP00000447931;	729747
Homo_sapiens	ARID1B	ENSG00000049618	ARID	ENSP00000344546;ENSP00000412835;ENSP00000489636;ENSP00000490550;ENSP00000490948;ENSP00000490385;ENSP00000489729;ENSP00000313006;ENSP00000383596;ENSP00000490491;ENSP00000055163;	57492
Homo_sapiens	ZNF426	ENSG00000130818	zf-C2H2	ENSP00000468100;ENSP00000253115;ENSP00000439017;	79088
Homo_sapiens	DLX4	ENSG00000108813	Homeobox	ENSP00000240306;ENSP00000480366;ENSP00000410622;	1748
Homo_sapiens	ZNF33B	ENSG00000196693	zf-C2H2	ENSP00000481265;ENSP00000352444;	7582
Homo_sapiens	ZNF639	ENSG00000121864	zf-C2H2	ENSP00000419650;ENSP00000477626;ENSP00000418766;ENSP00000417740;ENSP00000325634;	51193
Homo_sapiens	BARHL2	ENSG00000143032	Homeobox	ENSP00000359474;	343472
Homo_sapiens	ZNF83	ENSG00000167766	zf-C2H2	ENSP00000472619;ENSP00000301096;ENSP00000440713;ENSP00000445993;ENSP00000439681;	55769
Homo_sapiens	HAND2	ENSG00000164107	bHLH	ENSP00000352565;ENSP00000477638;ENSP00000427084;	9464
Homo_sapiens	ZBTB42	ENSG00000179627	ZBTB	ENSP00000450673;ENSP00000450673;ENSP00000409107;	100128927
Homo_sapiens	ARNTL2	ENSG00000029153	bHLH	ENSP00000379238;ENSP00000442438;ENSP00000266503;ENSP00000400185;ENSP00000438545;ENSP00000312247;ENSP00000445836;ENSP00000261178;	56938
Homo_sapiens	ZNF320	ENSG00000182986	zf-C2H2	ENSP00000473091;ENSP00000468995;	162967
Homo_sapiens	ZNF10	ENSG00000256223	zf-C2H2	ENSP00000248211;ENSP00000393814;ENSP00000384893;	7556
Homo_sapiens	TUB	ENSG00000166402	Tub	ENSP00000299506;ENSP00000434400;ENSP00000305426;	7275
Homo_sapiens	ZNF107	ENSG00000196247	zf-C2H2	ENSP00000343443;ENSP00000481898;ENSP00000400037;ENSP00000483720;ENSP00000378789;	51427
Homo_sapiens	ZFP36L1	ENSG00000185650	zf-CCCH	ENSP00000388402;ENSP00000337386;ENSP00000450600;ENSP00000450784;	677
Homo_sapiens	ZNF713	ENSG00000178665	zf-C2H2	ENSP00000487818;ENSP00000416662;	349075
Homo_sapiens	ARID2	ENSG00000189079	ARID	ENSP00000397307;ENSP00000335044;ENSP00000415650;	196528
Homo_sapiens	ATF4	ENSG00000128272	TF_bZIP	ENSP00000336790;ENSP00000384587;ENSP00000379912;	468
Homo_sapiens	KMT2C	ENSG00000055609	HMG	ENSP00000347325;ENSP00000262189;	58508
Homo_sapiens	ZNF783	ENSG00000204946	zf-C2H2	ENSP00000410890;	100289678
Homo_sapiens	HIVEP1	ENSG00000095951	zf-C2H2	ENSP00000486543;ENSP00000368698;ENSP00000445617;	3096
Homo_sapiens	MGA	ENSG00000174197	T-box	ENSP00000219905;ENSP00000457035;ENSP00000457151;ENSP00000442467;ENSP00000457474;ENSP00000455155;ENSP00000456141;	23269
Homo_sapiens	ZNF560	ENSG00000198028	zf-C2H2	ENSP00000301480;	147741
Homo_sapiens	MSX2	ENSG00000120149	Homeobox	ENSP00000239243;	4488
Homo_sapiens	ZNF174	ENSG00000103343	zf-C2H2	ENSP00000268655;ENSP00000460397;	7727
Homo_sapiens	TRPS1	ENSG00000104447	zf-GATA	ENSP00000428680;ENSP00000428910;ENSP00000220888;ENSP00000379065;ENSP00000428121;ENSP00000492037;	7227
Homo_sapiens	ZNF616	ENSG00000204611	zf-C2H2	ENSP00000471000;	90317
Homo_sapiens	DNAJC2	ENSG00000105821	MYB	ENSP00000368565;ENSP00000249270;	27000
Homo_sapiens	ATF3	ENSG00000162772	TF_bZIP	ENSP00000355954;ENSP00000355948;ENSP00000480606;ENSP00000336908;ENSP00000432208;ENSP00000344352;ENSP00000355952;ENSP00000483576;ENSP00000355950;	467
Homo_sapiens	HOXB3	ENSG00000120093	Homeobox	ENSP00000418035;ENSP00000417207;ENSP00000418729;ENSP00000308252;ENSP00000420595;ENSP00000418892;ENSP00000449977;ENSP00000419676;	3213
Homo_sapiens	ZNF101	ENSG00000181896	zf-C2H2	ENSP00000468049;ENSP00000400952;ENSP00000319716;ENSP00000466744;	94039
Homo_sapiens	ZNF583	ENSG00000198440	zf-C2H2	ENSP00000291598;ENSP00000388502;	147949
Homo_sapiens	ZNF880	ENSG00000221923	zf-C2H2	ENSP00000406318;	400713
Homo_sapiens	ELF4	ENSG00000102034	ETS	ENSP00000478297;ENSP00000338608;ENSP00000311280;	2000
Homo_sapiens	ZHX2	ENSG00000178764	Homeobox	ENSP00000314709;	22882
Homo_sapiens	GSC	ENSG00000133937	Homeobox	ENSP00000238558;	145258
Homo_sapiens	ZNF71	ENSG00000197951	zf-C2H2	ENSP00000328245;	58491
Homo_sapiens	HBP1	ENSG00000105856	HMG	ENSP00000418738;ENSP00000420500;ENSP00000475809;ENSP00000222574;ENSP00000419143;	26959
Homo_sapiens	HOXB8	ENSG00000120068	Homeobox	ENSP00000460659;ENSP00000460254;ENSP00000239144;	3218
Homo_sapiens	ZNF302	ENSG00000089335	zf-C2H2	ENSP00000396379;ENSP00000405219;ENSP00000391067;ENSP00000486577;ENSP00000421028;ENSP00000481754;	55900
Homo_sapiens	ZFP41	ENSG00000181638	zf-C2H2	ENSP00000327427;ENSP00000430465;	286128
Homo_sapiens	TBX20	ENSG00000164532	T-box	ENSP00000386170;	57057
Homo_sapiens	NEUROG1	ENSG00000181965	bHLH	ENSP00000317580;	4762
Homo_sapiens	DUX4	ENSG00000260596	Homeobox	ENSP00000458065;ENSP00000455112;ENSP00000483555;ENSP00000456539;	100288687
Homo_sapiens	PKNOX2	ENSG00000165495	Homeobox	ENSP00000298282;	63876
Homo_sapiens	SMARCA1	ENSG00000102038	MYB	ENSP00000360162;ENSP00000360163;ENSP00000360164;	6594
Homo_sapiens	ZSCAN18	ENSG00000121413	zf-C2H2	ENSP00000412253;ENSP00000392653;ENSP00000470123;ENSP00000468934;ENSP00000240727;	65982
Homo_sapiens	ZNF334	ENSG00000198185	zf-C2H2	ENSP00000485779;ENSP00000402582;ENSP00000484362;ENSP00000255129;ENSP00000473194;	55713
Homo_sapiens	ZNF219	ENSG00000165804	zf-C2H2	ENSP00000450609;ENSP00000451969;ENSP00000451212;ENSP00000392401;ENSP00000450900;ENSP00000450803;ENSP00000354206;ENSP00000388558;ENSP00000451890;	51222
Homo_sapiens	THRA	ENSG00000126351	THR-like	ENSP00000264637;ENSP00000463466;ENSP00000395641;ENSP00000377679;ENSP00000464123;ENSP00000443972;ENSP00000462955;	7067
Homo_sapiens	ZIM2	ENSG00000269699	zf-C2H2	ENSP00000470326;ENSP00000486502;ENSP00000472306;ENSP00000468984;	23619
Homo_sapiens	TCF24	ENSG00000261787	bHLH	ENSP00000455444;	100129654
Homo_sapiens	ZNF181	ENSG00000197841	zf-C2H2	ENSP00000420727;ENSP00000419435;ENSP00000376065;	339318
Homo_sapiens	ALX4	ENSG00000052850	Homeobox	ENSP00000332744;	60529
Homo_sapiens	HDX	ENSG00000165259	Homeobox	ENSP00000297977;ENSP00000423670;ENSP00000362272;	139324
Homo_sapiens	ZNF530	ENSG00000183647	zf-C2H2	ENSP00000332861;ENSP00000472564;	348327
Homo_sapiens	GMEB2	ENSG00000101216	SAND	ENSP00000359094;ENSP00000359086;ENSP00000266068;	26205
Homo_sapiens	SMAD9	ENSG00000120693	MH1	ENSP00000382216;ENSP00000239885;ENSP00000369154;	4093
Homo_sapiens	HOXC11	ENSG00000123388	Homeobox	ENSP00000446680;	3227
Homo_sapiens	ZNF502	ENSG00000196653	zf-C2H2	ENSP00000296091;ENSP00000406469;ENSP00000397390;	91392
Homo_sapiens	ZNF114	ENSG00000178150	zf-C2H2	ENSP00000469998;ENSP00000471727;ENSP00000318898;	163071
Homo_sapiens	TBX4	ENSG00000121075	T-box	ENSP00000495714;ENSP00000377435;ENSP00000240335;ENSP00000495986;ENSP00000467588;	9496
Homo_sapiens	E2F6	ENSG00000169016	E2F	ENSP00000446315;ENSP00000370936;ENSP00000302159;ENSP00000438864;	1876
Homo_sapiens	FOXD4L4	ENSG00000184659	Fork_head	ENSP00000366630;	349334
Homo_sapiens	ZNF233	ENSG00000159915	zf-C2H2	ENSP00000375820;	353355
Homo_sapiens	ZNF230	ENSG00000159882	zf-C2H2	ENSP00000409318;	7773
Homo_sapiens	ZNF594	ENSG00000180626	zf-C2H2	ENSP00000382513;ENSP00000461032;	84622
Homo_sapiens	TULP1	ENSG00000112041	Tub	ENSP00000477534;ENSP00000229771;ENSP00000319414;	7287
Homo_sapiens	HOXB9	ENSG00000170689	Homeobox	ENSP00000309439;	3219
Homo_sapiens	SSRP1	ENSG00000149136	HMG	ENSP00000489564;ENSP00000278412;	6749
Homo_sapiens	DLX3	ENSG00000064195	Homeobox	ENSP00000449976;ENSP00000389870;	1747
Homo_sapiens	ZBTB1	ENSG00000126804	ZBTB	ENSP00000451000;ENSP00000451000;ENSP00000450689;ENSP00000451584;	22890
Homo_sapiens	AHR	ENSG00000106546	bHLH	ENSP00000436466;ENSP00000495987;ENSP00000242057;	196
Homo_sapiens	ZNF660	ENSG00000144792	zf-C2H2	ENSP00000324605;	285349
Homo_sapiens	CSRNP2	ENSG00000110925	CSRNP_N	ENSP00000228515;ENSP00000447657;ENSP00000447983;ENSP00000447065;	81566
Homo_sapiens	HIVEP3	ENSG00000127124	zf-C2H2	ENSP00000361665;ENSP00000361664;ENSP00000494598;	59269
Homo_sapiens	FOXJ3	ENSG00000198815	Fork_head	ENSP00000393408;ENSP00000439044;ENSP00000354449;ENSP00000403060;ENSP00000361653;ENSP00000361654;ENSP00000354620;	22887
Homo_sapiens	PRDM8	ENSG00000152784	zf-C2H2	ENSP00000406998;ENSP00000423985;ENSP00000339764;	56978
Homo_sapiens	RORC	ENSG00000143365	THR-like	ENSP00000327025;ENSP00000349164;	6097
Homo_sapiens	CEBPG	ENSG00000153879	TF_bZIP	ENSP00000284000;ENSP00000466022;	1054
Homo_sapiens	BACH1	ENSG00000156273	TF_bZIP	ENSP00000416569;ENSP00000286800;ENSP00000400576;ENSP00000470673;ENSP00000408605;ENSP00000392202;ENSP00000382805;	100379661
Homo_sapiens	ZNF705B	ENSG00000215356	zf-C2H2	ENSP00000382987;	100132396
Homo_sapiens	ZNF319	ENSG00000166188	zf-C2H2	ENSP00000299237;	57567
Homo_sapiens	FOXR1	ENSG00000176302	Fork_head	ENSP00000314806;	283150
Homo_sapiens	ZNF41	ENSG00000147124	zf-C2H2	ENSP00000315173;ENSP00000366265;	7592
Homo_sapiens	YBX1	ENSG00000065978	CSD	ENSP00000361626;ENSP00000405937;ENSP00000389639;	4904
Homo_sapiens	SATB2	ENSG00000119042	CUT	ENSP00000388764;ENSP00000401112;ENSP00000388581;ENSP00000483287;ENSP00000260926;ENSP00000405420;	23314
Homo_sapiens	ZSCAN1	ENSG00000152467	zf-C2H2	ENSP00000282326;	284312
Homo_sapiens	ZNF571	ENSG00000180479	zf-C2H2	ENSP00000351594;ENSP00000392638;ENSP00000467572;ENSP00000333660;	51276
Homo_sapiens	NKX2-8	ENSG00000136327	Homeobox	ENSP00000258829;	26257
Homo_sapiens	ZNF3	ENSG00000166526	zf-C2H2	ENSP00000299667;ENSP00000415358;ENSP00000306372;	7551
Homo_sapiens	TEAD2	ENSG00000074219	TEA	ENSP00000366419;ENSP00000469672;ENSP00000469640;ENSP00000472109;ENSP00000310701;	8463
Homo_sapiens	NR5A1	ENSG00000136931	SF-like	ENSP00000483309;ENSP00000362690;ENSP00000393245;ENSP00000362689;	2516
Homo_sapiens	ZNF485	ENSG00000198298	zf-C2H2	ENSP00000363558;ENSP00000354694;	220992
Homo_sapiens	NR2F2	ENSG00000185551	RXR-like	ENSP00000377721;ENSP00000377726;ENSP00000457112;ENSP00000389853;ENSP00000401674;	7026
Homo_sapiens	ZNF491	ENSG00000177599	zf-C2H2	ENSP00000313443;ENSP00000392176;	126069
Homo_sapiens	SP6	ENSG00000189120	zf-C2H2	ENSP00000340799;ENSP00000438209;	80320
Homo_sapiens	ZNF439	ENSG00000171291	zf-C2H2	ENSP00000395632;ENSP00000305077;	90594
Homo_sapiens	KLF14	ENSG00000266265	zf-C2H2	ENSP00000463287;	136259
Homo_sapiens	IKZF1	ENSG00000185811	zf-C2H2	ENSP00000413025;ENSP00000396554;ENSP00000342750;ENSP00000331614;ENSP00000483016;ENSP00000352123;ENSP00000496453;ENSP00000494055;ENSP00000478368;ENSP00000349928;	10320
Homo_sapiens	UBP1	ENSG00000153560	CP2	ENSP00000395558;ENSP00000283629;ENSP00000401614;ENSP00000283628;	7342
Homo_sapiens	DUXB	ENSG00000282757	Homeobox	ENSP00000491301;	100033411
Homo_sapiens	FOXA3	ENSG00000170608	Fork_head	ENSP00000304004;	3171
Homo_sapiens	ZBTB26	ENSG00000171448	ZBTB	ENSP00000362760;ENSP00000362760;ENSP00000362758;	57684
Homo_sapiens	ZNF215	ENSG00000149054	zf-C2H2	ENSP00000393202;ENSP00000278319;	7762
Homo_sapiens	ZNF284	ENSG00000186026	zf-C2H2	ENSP00000411032;	342909
Homo_sapiens	ZNF667	ENSG00000198046	zf-C2H2	ENSP00000439402;ENSP00000292069;ENSP00000486473;	63934
Homo_sapiens	ZKSCAN2	ENSG00000155592	zf-C2H2	ENSP00000331626;	342357
Homo_sapiens	THAP9	ENSG00000168152	THAP	ENSP00000305533;ENSP00000426750;ENSP00000425966;ENSP00000425503;	79725
Homo_sapiens	TCF21	ENSG00000118526	bHLH	ENSP00000237316;ENSP00000356857;	6943
Homo_sapiens	ZNF197	ENSG00000186448	zf-C2H2	ENSP00000345809;ENSP00000379370;	10168
Homo_sapiens	ZNF549	ENSG00000121406	zf-C2H2	ENSP00000365407;ENSP00000240719;	256051
Homo_sapiens	PROX1	ENSG00000117707	HPD	ENSP00000420283;ENSP00000261454;ENSP00000355925;ENSP00000400694;	5629
Homo_sapiens	TCFL5	ENSG00000101190	bHLH	ENSP00000217162;ENSP00000334294;	10732
Homo_sapiens	FOSL2	ENSG00000075426	TF_bZIP	ENSP00000264716;ENSP00000368939;ENSP00000396497;	2355
Homo_sapiens	E2F3	ENSG00000112242	E2F	ENSP00000443418;ENSP00000262904;ENSP00000483249;	1871
Homo_sapiens	BAZ2A	ENSG00000076108	MBD	ENSP00000368754;ENSP00000447941;ENSP00000446880;ENSP00000449473;	11176
Homo_sapiens	HMGB3	ENSG00000029993	HMG	ENSP00000410354;ENSP00000359393;ENSP00000405601;ENSP00000417027;ENSP00000442758;	3149
Homo_sapiens	ZNF599	ENSG00000153896	zf-C2H2	ENSP00000333802;	148103
Homo_sapiens	ZNF492	ENSG00000229676	zf-C2H2	ENSP00000413660;	57615
Homo_sapiens	ZNF232	ENSG00000167840	zf-C2H2	ENSP00000250076;ENSP00000461305;	7775
Homo_sapiens	MIER3	ENSG00000155545	MYB	ENSP00000386584;ENSP00000370596;ENSP00000370611;ENSP00000370624;	166968
Homo_sapiens	GLI1	ENSG00000111087	zf-C2H2	ENSP00000436671;ENSP00000441006;ENSP00000437607;ENSP00000434408;ENSP00000228682;	2735
Homo_sapiens	ZBTB24	ENSG00000112365	ZBTB	ENSP00000230122;ENSP00000230122;	9841
Homo_sapiens	ZNF532	ENSG00000074657	zf-C2H2	ENSP00000468532;ENSP00000465709;ENSP00000466007;ENSP00000338217;ENSP00000468238;ENSP00000464894;	55205
Homo_sapiens	ZNF644	ENSG00000122482	zf-C2H2	ENSP00000482748;	84146
Homo_sapiens	HOXD3	ENSG00000128652	Homeobox	ENSP00000386498;ENSP00000249440;	3232
Homo_sapiens	UBTF	ENSG00000108312	HMG	ENSP00000345297;ENSP00000437180;ENSP00000432925;ENSP00000390669;ENSP00000431295;ENSP00000435708;ENSP00000431539;ENSP00000377231;ENSP00000302640;ENSP00000433046;	7343
Homo_sapiens	ZNF410	ENSG00000119725	zf-C2H2	ENSP00000334170;ENSP00000451763;ENSP00000490985;ENSP00000483073;ENSP00000407130;ENSP00000323293;ENSP00000442228;ENSP00000451620;ENSP00000451748;	57862
Homo_sapiens	SP140	ENSG00000079263	SAND	ENSP00000393618;ENSP00000398210;ENSP00000342096;ENSP00000375899;	11262
Homo_sapiens	ZNF92	ENSG00000146757	zf-C2H2	ENSP00000400495;ENSP00000396126;ENSP00000350113;ENSP00000332595;	168374
Homo_sapiens	HINFP	ENSG00000172273	zf-C2H2	ENSP00000318085;ENSP00000436815;	25988
Homo_sapiens	LHX8	ENSG00000162624	Homeobox	ENSP00000294638;ENSP00000348597;	431707
Homo_sapiens	AC025287.4	ENSG00000284484	Homeobox	ENSP00000491197;	-
Homo_sapiens	ZNF20	ENSG00000132010	zf-C2H2	ENSP00000335437;	7568
Homo_sapiens	ZNF418	ENSG00000196724	zf-C2H2	ENSP00000379451;ENSP00000407039;ENSP00000468968;ENSP00000483763;ENSP00000471652;	147686
Homo_sapiens	ZBTB14	ENSG00000198081	ZBTB	ENSP00000349503;ENSP00000349503;ENSP00000478971;ENSP00000484129;ENSP00000383009;ENSP00000463555;	7541
Homo_sapiens	MLXIP	ENSG00000175727	bHLH	ENSP00000445891;ENSP00000440769;ENSP00000312834;ENSP00000444507;	22877
Homo_sapiens	CREB3L4	ENSG00000143578	TF_bZIP	ENSP00000357592;ENSP00000357589;ENSP00000391847;ENSP00000271889;ENSP00000357596;	148327
Homo_sapiens	SCX	ENSG00000260428	bHLH	ENSP00000476384;	642658
Homo_sapiens	NANOGP8	ENSG00000255192	Homeobox	ENSP00000487045;ENSP00000487073;	388112
Homo_sapiens	ZNF548	ENSG00000188785	zf-C2H2	ENSP00000379482;ENSP00000337555;	147694
Homo_sapiens	L3MBTL4	ENSG00000154655	zf-C2HC	ENSP00000318543;ENSP00000382976;ENSP00000382975;	91133
Homo_sapiens	ZNF655	ENSG00000197343	zf-C2H2	ENSP00000252713;ENSP00000377718;ENSP00000419135;ENSP00000393876;	79027
Homo_sapiens	AC118549	ENSG00000036549	MYB	ENSP00000359837;ENSP00000359834;	26009
Homo_sapiens	TBX10	ENSG00000167800	T-box	ENSP00000335191;	347853
Homo_sapiens	ZNF587	ENSG00000198466	zf-C2H2	ENSP00000345479;ENSP00000393865;ENSP00000406999;	84914
Homo_sapiens	AC012531.3	ENSG00000273049	Homeobox	ENSP00000476742;	-
Homo_sapiens	ELF1	ENSG00000120690	ETS	ENSP00000489586;ENSP00000486912;ENSP00000239882;	1997
Homo_sapiens	AC073612.1	ENSG00000258064	THAP	ENSP00000454911;	-
Homo_sapiens	LIN28A	ENSG00000131914	CSD	ENSP00000254231;ENSP00000363314;	79727
Homo_sapiens	HMGXB4	ENSG00000100281	HMG	ENSP00000216106;	10042
Homo_sapiens	ZNF396	ENSG00000186496	zf-C2H2	ENSP00000466500;ENSP00000302310;	252884
Homo_sapiens	NR2E1	ENSG00000112333	RXR-like	ENSP00000357982;ENSP00000357979;	7101
Homo_sapiens	ZNF823	ENSG00000197933	zf-C2H2	ENSP00000340683;ENSP00000466840;ENSP00000410654;	55552
Homo_sapiens	STAT4	ENSG00000138378	STAT	ENSP00000376134;ENSP00000351255;	6775
Homo_sapiens	ZNF626	ENSG00000188171	zf-C2H2	ENSP00000484232;ENSP00000469566;ENSP00000469958;	199777
Homo_sapiens	AC105001.2	ENSG00000258724	HMG	ENSP00000451145;	-
Homo_sapiens	TEF	ENSG00000167074	TF_bZIP	ENSP00000266304;ENSP00000385256;	7008
Homo_sapiens	PPARA	ENSG00000186951	THR-like	ENSP00000385523;ENSP00000414752;ENSP00000262735;ENSP00000385246;	5465
Homo_sapiens	ZNF8	ENSG00000278129	zf-C2H2	ENSP00000477716;	7554
Homo_sapiens	ZNF501	ENSG00000186446	zf-C2H2	ENSP00000379363;ENSP00000482632;	115560
Homo_sapiens	ZNF454	ENSG00000178187	zf-C2H2	ENSP00000326249;ENSP00000430354;	285676
Homo_sapiens	PRDM2	ENSG00000116731	zf-C2H2	ENSP00000312352;ENSP00000411103;ENSP00000235372;ENSP00000341621;	7799
Homo_sapiens	ETS1	ENSG00000134954	ETS	ENSP00000441430;ENSP00000433500;ENSP00000376436;ENSP00000324578;	2113
Homo_sapiens	PRDM6	ENSG00000061455	zf-C2H2	ENSP00000384725;	93166
Homo_sapiens	ZBED3	ENSG00000132846	zf-BED	ENSP00000427487;ENSP00000255198;	84327
Homo_sapiens	ZNF354C	ENSG00000177932	zf-C2H2	ENSP00000324064;	30832
Homo_sapiens	ESX1	ENSG00000123576	Homeobox	ENSP00000361669;	80712
Homo_sapiens	HOXB6	ENSG00000108511	Homeobox	ENSP00000420009;ENSP00000225648;	3216
Homo_sapiens	NFKB1	ENSG00000109320	RHD	ENSP00000226574;ENSP00000423877;ENSP00000424815;ENSP00000469340;ENSP00000424790;ENSP00000426147;ENSP00000420904;ENSP00000378297;	4790
Homo_sapiens	TULP3	ENSG00000078246	Tub	ENSP00000380321;ENSP00000442631;ENSP00000440364;ENSP00000410051;ENSP00000441319;	7289
Homo_sapiens	RARG	ENSG00000172819	THR-like	ENSP00000343698;ENSP00000388510;ENSP00000444335;ENSP00000377947;	5916
Homo_sapiens	ZNF705G	ENSG00000215372	zf-C2H2	ENSP00000383020;	100131980
Homo_sapiens	OLIG3	ENSG00000177468	bHLH	ENSP00000356708;	167826
Homo_sapiens	ZNF821	ENSG00000102984	zf-C2H2	ENSP00000458112;	55565
Homo_sapiens	HNF4A	ENSG00000101076	RXR-like	ENSP00000315180;ENSP00000396216;ENSP00000476609;ENSP00000476310;ENSP00000410911;ENSP00000481331;ENSP00000312987;ENSP00000412111;	3172
Homo_sapiens	TCF7	ENSG00000081059	HMG	ENSP00000378472;ENSP00000429547;ENSP00000429935;ENSP00000367822;ENSP00000378469;ENSP00000340347;ENSP00000429178;ENSP00000427968;ENSP00000430179;	6932
Homo_sapiens	SMAD4	ENSG00000141646	MH1	ENSP00000381452;ENSP00000341551;ENSP00000466941;ENSP00000468611;ENSP00000466934;ENSP00000465874;ENSP00000464772;ENSP00000464901;ENSP00000465878;	4089
Homo_sapiens	DMRTC2	ENSG00000142025	DM	ENSP00000470553;ENSP00000269945;ENSP00000469525;ENSP00000472488;ENSP00000472159;ENSP00000472215;	63946
Homo_sapiens	ZBED5	ENSG00000236287	zf-BED	ENSP00000398106;ENSP00000415939;	58486
Homo_sapiens	NEUROG3	ENSG00000122859	bHLH	ENSP00000242462;	50674
Homo_sapiens	ESR2	ENSG00000140009	ESR-like	ENSP00000450488;ENSP00000451582;ENSP00000335551;ENSP00000267525;ENSP00000343925;ENSP00000351412;ENSP00000345616;ENSP00000450699;ENSP00000452426;ENSP00000452485;	2100
Homo_sapiens	ZNF683	ENSG00000176083	zf-C2H2	ENSP00000388792;ENSP00000384782;ENSP00000344095;	257101
Homo_sapiens	ZEB1	ENSG00000148516	zf-C2H2	ENSP00000452787;ENSP00000452787;ENSP00000415961;ENSP00000453559;ENSP00000319248;ENSP00000319248;ENSP00000453674;ENSP00000444891;ENSP00000444891;ENSP00000453970;ENSP00000354487;ENSP00000354487;ENSP00000391612;	6935
Homo_sapiens	NPAS3	ENSG00000151322	bHLH	ENSP00000319610;ENSP00000448373;ENSP00000450392;ENSP00000348460;ENSP00000448916;ENSP00000350446;	64067
Homo_sapiens	ZNF785	ENSG00000197162	zf-C2H2	ENSP00000420340;ENSP00000456097;ENSP00000378642;	146540
Homo_sapiens	HOXA4	ENSG00000197576	Homeobox	ENSP00000448015;ENSP00000479166;ENSP00000353151;ENSP00000408845;	3201
Homo_sapiens	ZNF831	ENSG00000124203	zf-C2H2	ENSP00000360069;ENSP00000490240;	128611
Homo_sapiens	HOXB5	ENSG00000120075	Homeobox	ENSP00000239151;	3215
Homo_sapiens	HMGXB3	ENSG00000113716	HMG	ENSP00000422231;ENSP00000421917;ENSP00000479027;	22993
Homo_sapiens	ZNF227	ENSG00000131115	zf-C2H2	ENSP00000375823;ENSP00000321049;ENSP00000482749;ENSP00000467577;	7770
Homo_sapiens	ZNF446	ENSG00000083838	zf-C2H2	ENSP00000472219;ENSP00000478778;ENSP00000484676;ENSP00000472802;	55663
Homo_sapiens	PAXBP1	ENSG00000159086	GCFC	ENSP00000290178;ENSP00000328992;	94104
Homo_sapiens	HSFX2	ENSG00000268738	HSF	ENSP00000469223;	100130086
Homo_sapiens	ARID4B	ENSG00000054267	ARID	ENSP00000391497;ENSP00000264183;ENSP00000394663;ENSP00000264184;ENSP00000355562;	51742
Homo_sapiens	ZNF157	ENSG00000147117	zf-C2H2	ENSP00000366273;	7712
Homo_sapiens	MXD4	ENSG00000123933	bHLH	ENSP00000337889;	10608
Homo_sapiens	LRRFIP1	ENSG00000124831	LRRFIP	ENSP00000375857;ENSP00000310109;ENSP00000289175;ENSP00000244815;ENSP00000409431;	9208
Homo_sapiens	ZFP30	ENSG00000120784	zf-C2H2	ENSP00000343581;ENSP00000422930;	22835
Homo_sapiens	ELF3	ENSG00000163435	ETS	ENSP00000356253;ENSP00000356252;ENSP00000352673;	1999
Homo_sapiens	INSM2	ENSG00000168348	zf-C2H2	ENSP00000306523;	84684
Homo_sapiens	HMGA1	ENSG00000137309	HMGA	ENSP00000385693;ENSP00000363230;ENSP00000308227;ENSP00000288245;ENSP00000399888;	3159
Homo_sapiens	MITF	ENSG00000187098	bHLH	ENSP00000418845;ENSP00000295600;ENSP00000494105;ENSP00000377880;ENSP00000435909;ENSP00000324443;ENSP00000391803;ENSP00000327867;ENSP00000398639;ENSP00000324246;	4286
Homo_sapiens	MXI1	ENSG00000119950	bHLH	ENSP00000358625;ENSP00000331152;ENSP00000239007;ENSP00000376842;ENSP00000407711;ENSP00000354606;ENSP00000398981;	4601
Homo_sapiens	NR4A1	ENSG00000123358	NGFIB-like	ENSP00000353427;ENSP00000440864;ENSP00000243050;ENSP00000378301;ENSP00000457070;ENSP00000449587;ENSP00000378302;ENSP00000449539;	3164
Homo_sapiens	ZNF585B	ENSG00000245680	zf-C2H2	ENSP00000436774;ENSP00000433773;	92285
Homo_sapiens	TBX21	ENSG00000073861	T-box	ENSP00000177694;	30009
Homo_sapiens	TFAP2C	ENSG00000087510	AP-2	ENSP00000201031;	7022
Homo_sapiens	HMG20A	ENSG00000140382	HMG	ENSP00000452864;ENSP00000371133;ENSP00000453727;ENSP00000454136;ENSP00000336856;	10363
Homo_sapiens	ZNF770	ENSG00000198146	zf-C2H2	ENSP00000453474;ENSP00000348673;	54989
Homo_sapiens	KLF6	ENSG00000067082	zf-C2H2	ENSP00000419923;	1316
Homo_sapiens	GLI2	ENSG00000074047	zf-C2H2	ENSP00000354586;ENSP00000390436;	2736
Homo_sapiens	SIX4	ENSG00000100625	Homeobox	ENSP00000450761;ENSP00000216513;	51804
Homo_sapiens	ZNF813	ENSG00000198346	zf-C2H2	ENSP00000379684;	126017
Homo_sapiens	ZNF7	ENSG00000147789	zf-C2H2	ENSP00000432724;ENSP00000393260;ENSP00000439424;	7553
Homo_sapiens	FOXK2	ENSG00000141568	Fork_head	ENSP00000335677;ENSP00000436108;ENSP00000433167;ENSP00000432663;	3607
Homo_sapiens	ZNF577	ENSG00000161551	zf-C2H2	ENSP00000491349;ENSP00000491936;ENSP00000301399;ENSP00000389652;	84765
Homo_sapiens	RHOXF2B	ENSG00000203989	Homeobox	ENSP00000360455;	727940
Homo_sapiens	ZNF623	ENSG00000183309	zf-C2H2	ENSP00000435232;ENSP00000411139;ENSP00000445979;	9831
Homo_sapiens	USF3	ENSG00000176542	bHLH	ENSP00000420721;ENSP00000420752;ENSP00000320794;	205717
Homo_sapiens	SOX12	ENSG00000177732	HMG	ENSP00000347646;	6666
Homo_sapiens	HSF4	ENSG00000102878	HSF	ENSP00000427832;ENSP00000463706;ENSP00000430299;ENSP00000430631;ENSP00000403219;ENSP00000428161;ENSP00000428978;ENSP00000430947;	3299
Homo_sapiens	ZNF705E	ENSG00000214534	zf-C2H2	ENSP00000492790;	100131539
Homo_sapiens	GCM2	ENSG00000124827	GCM	ENSP00000368805;	9247
Homo_sapiens	E2F4	ENSG00000205250	E2F	ENSP00000458082;ENSP00000368686;ENSP00000454477;ENSP00000457239;	1874
Homo_sapiens	FOXP1	ENSG00000114861	Fork_head	ENSP00000482847;ENSP00000333560;ENSP00000484803;ENSP00000419393;ENSP00000417857;ENSP00000418524;ENSP00000418883;ENSP00000318902;ENSP00000418102;ENSP00000418225;ENSP00000420736;	27086
Homo_sapiens	FOXF1	ENSG00000103241	Fork_head	ENSP00000262426;	2294
Homo_sapiens	DMRT1	ENSG00000137090	DM	ENSP00000371711;	1761
Homo_sapiens	ZNF518B	ENSG00000178163	zf-C2H2	ENSP00000317614;	85460
Homo_sapiens	ZNF436	ENSG00000125945	zf-C2H2	ENSP00000313582;ENSP00000363736;	80818
Homo_sapiens	NHLH1	ENSG00000171786	bHLH	ENSP00000302189;	4807
Homo_sapiens	ZBTB33	ENSG00000177485	ZBTB	ENSP00000450969;ENSP00000450969;ENSP00000314153;ENSP00000314153;	10009
Homo_sapiens	SP8	ENSG00000164651	zf-C2H2	ENSP00000408792;ENSP00000483588;ENSP00000354482;	221833
Homo_sapiens	NR1D2	ENSG00000174738	THR-like	ENSP00000373283;ENSP00000310006;	9975
Homo_sapiens	FLI1	ENSG00000151702	ETS	ENSP00000281428;ENSP00000432950;ENSP00000433488;ENSP00000339627;	2313
Homo_sapiens	REPIN1	ENSG00000214022	zf-C2H2	ENSP00000428562;ENSP00000419872;ENSP00000388287;ENSP00000380451;ENSP00000419789;ENSP00000407714;ENSP00000417291;	29803
Homo_sapiens	SNAI2	ENSG00000019549	zf-C2H2	ENSP00000494171;ENSP00000020945;	6591
Homo_sapiens	TFAP2A	ENSG00000137203	AP-2	ENSP00000419961;ENSP00000368928;ENSP00000418541;ENSP00000316516;ENSP00000417735;ENSP00000417495;ENSP00000368933;ENSP00000419696;	7020
Homo_sapiens	ETS2	ENSG00000157557	ETS	ENSP00000354194;ENSP00000353344;	2114
Homo_sapiens	ZNF735	ENSG00000223614	zf-C2H2	ENSP00000485547;	730291
Homo_sapiens	HOXC5	ENSG00000172789	Homeobox	ENSP00000309336;	3222
Homo_sapiens	SOX9	ENSG00000125398	HMG	ENSP00000495527;ENSP00000245479;	6662
Homo_sapiens	NR2C1	ENSG00000120798	RXR-like	ENSP00000376813;ENSP00000478728;ENSP00000333275;ENSP00000328843;	7181
Homo_sapiens	NFYA	ENSG00000001167	NF-YA	ENSP00000229418;ENSP00000345702;	4800
Homo_sapiens	NKX3-2	ENSG00000109705	Homeobox	ENSP00000371875;	579
Homo_sapiens	TTF1	ENSG00000125482	MYB	ENSP00000481441;ENSP00000333920;	7270
Homo_sapiens	NR4A3	ENSG00000119508	NGFIB-like	ENSP00000333122;ENSP00000378531;ENSP00000482027;ENSP00000340301;	8013
Homo_sapiens	ZNF768	ENSG00000169957	zf-C2H2	ENSP00000369777;ENSP00000456527;	79724
Homo_sapiens	SETDB2	ENSG00000136169	MBD	ENSP00000346175;ENSP00000258672;ENSP00000482240;ENSP00000326477;	83852
Homo_sapiens	FOXI1	ENSG00000168269	Fork_head	ENSP00000415483;ENSP00000304286;	2299
Homo_sapiens	ZNF574	ENSG00000105732	zf-C2H2	ENSP00000351939;ENSP00000469029;ENSP00000471611;ENSP00000222339;	64763
Homo_sapiens	FOXL1	ENSG00000176678	Fork_head	ENSP00000326272;ENSP00000472376;	2300
Homo_sapiens	ZNF527	ENSG00000189164	zf-C2H2	ENSP00000390179;	84503
Homo_sapiens	CIC	ENSG00000079432	HMG	ENSP00000160740;ENSP00000459719;ENSP00000458663;	23152
Homo_sapiens	HES6	ENSG00000144485	bHLH	ENSP00000387155;ENSP00000387008;ENSP00000387215;ENSP00000272937;	55502
Homo_sapiens	NKX2-6	ENSG00000180053	Homeobox	ENSP00000320089;	137814
Homo_sapiens	NR1D1	ENSG00000126368	THR-like	ENSP00000246672;	9572
Homo_sapiens	ZNF121	ENSG00000197961	zf-C2H2	ENSP00000468643;ENSP00000467838;ENSP00000326967;	7675
Homo_sapiens	ZBTB7C	ENSG00000184828	ZBTB	ENSP00000468254;ENSP00000468254;ENSP00000467877;ENSP00000467877;ENSP00000468782;ENSP00000468782;ENSP00000439781;ENSP00000439781;	201501
Homo_sapiens	ZNF619	ENSG00000177873	zf-C2H2	ENSP00000398024;ENSP00000411132;ENSP00000322529;ENSP00000428004;ENSP00000397232;ENSP00000430705;ENSP00000388710;	285267
Homo_sapiens	SOX2	ENSG00000181449	HMG	ENSP00000323588;	6657
Homo_sapiens	ZNF131	ENSG00000172262	ZBTB	ENSP00000423945;ENSP00000423945;ENSP00000421246;ENSP00000421246;ENSP00000426504;ENSP00000426504;ENSP00000305804;ENSP00000426614;	7690
Homo_sapiens	E2F1	ENSG00000101412	E2F	ENSP00000345571;	1869
Homo_sapiens	ZNF678	ENSG00000181450	zf-C2H2	ENSP00000344828;ENSP00000394651;ENSP00000440403;	339500
Homo_sapiens	ZSCAN25	ENSG00000197037	zf-C2H2	ENSP00000262941;ENSP00000334800;ENSP00000377708;	221785
Homo_sapiens	THAP8	ENSG00000161277	THAP	ENSP00000292894;	199745
Homo_sapiens	ZNF596	ENSG00000172748	zf-C2H2	ENSP00000310033;ENSP00000318719;ENSP00000381613;	169270
Homo_sapiens	ZNF622	ENSG00000173545	zf-C2H2	ENSP00000310042;	90441
Homo_sapiens	ZBTB2	ENSG00000181472	ZBTB	ENSP00000323183;ENSP00000323183;	57621
Homo_sapiens	ZSCAN26	ENSG00000197062	zf-C2H2	ENSP00000485228;ENSP00000484931;ENSP00000478769;ENSP00000479314;ENSP00000484018;ENSP00000481707;	7741
Homo_sapiens	MYF6	ENSG00000111046	bHLH	ENSP00000228641;	4618
Homo_sapiens	ZNF236	ENSG00000130856	zf-C2H2	ENSP00000463787;ENSP00000253159;ENSP00000444524;ENSP00000322361;	7776
Homo_sapiens	ZNF589	ENSG00000164048	zf-C2H2	ENSP00000404592;ENSP00000346729;	51385
Homo_sapiens	TWIST2	ENSG00000233608	bHLH	ENSP00000405176;ENSP00000482581;	117581
Homo_sapiens	PATZ1	ENSG00000100105	ZBTB	ENSP00000337520;ENSP00000337520;ENSP00000215919;ENSP00000215919;ENSP00000266269;ENSP00000266269;ENSP00000384173;	23598
Homo_sapiens	LBX1	ENSG00000138136	Homeobox	ENSP00000359212;	10660
Homo_sapiens	ZBTB40	ENSG00000184677	ZBTB	ENSP00000384527;ENSP00000384527;ENSP00000363782;ENSP00000363782;ENSP00000364798;ENSP00000364798;ENSP00000383098;	9923
Homo_sapiens	ZSCAN16	ENSG00000196812	zf-C2H2	ENSP00000366527;	80345
Homo_sapiens	ZNF202	ENSG00000166261	zf-C2H2	ENSP00000433881;ENSP00000432504;ENSP00000337724;	7753
Homo_sapiens	ZNF782	ENSG00000196597	zf-C2H2	ENSP00000419397;ENSP00000418686;ENSP00000440624;	158431
Homo_sapiens	HSFX3	ENSG00000283697	HSF	ENSP00000490928;	101928917
Homo_sapiens	ZNF721	ENSG00000182903	zf-C2H2	ENSP00000340524;ENSP00000428878;	170960
Homo_sapiens	ZNF676	ENSG00000196109	zf-C2H2	ENSP00000380310;	163223
Homo_sapiens	ZXDC	ENSG00000070476	zf-C2H2	ENSP00000374359;ENSP00000426532;ENSP00000337694;	79364
Homo_sapiens	ZNF576	ENSG00000124444	zf-C2H2	ENSP00000435934;ENSP00000435463;ENSP00000375827;ENSP00000435899;ENSP00000436182;ENSP00000337852;	79177
Homo_sapiens	POU3F1	ENSG00000185668	Pou	ENSP00000362103;	5453
Homo_sapiens	IRF6	ENSG00000117595	IRF	ENSP00000355988;ENSP00000496669;ENSP00000403855;	3664
Homo_sapiens	OSR1	ENSG00000143867	zf-C2H2	ENSP00000272223;	130497
Homo_sapiens	PRDM14	ENSG00000147596	zf-C2H2	ENSP00000276594;	63978
Homo_sapiens	ZNF586	ENSG00000083828	zf-C2H2	ENSP00000375583;ENSP00000379458;	54807
Homo_sapiens	TBX19	ENSG00000143178	T-box	ENSP00000356795;ENSP00000397540;	9095
Homo_sapiens	FOXN2	ENSG00000170802	Fork_head	ENSP00000388486;ENSP00000484534;ENSP00000343633;	3344
Homo_sapiens	EVX2	ENSG00000174279	Homeobox	ENSP00000312385;	344191
Homo_sapiens	ZBED1	ENSG00000214717	zf-BED	ENSP00000370621;ENSP00000370616;ENSP00000419148;ENSP00000370620;	9189
Homo_sapiens	IRX6	ENSG00000159387	Homeobox	ENSP00000290552;	79190
Homo_sapiens	PBX2	ENSG00000204304	Homeobox	ENSP00000364190;	5089
Homo_sapiens	CLOCK	ENSG00000134852	bHLH	ENSP00000396649;ENSP00000308741;ENSP00000426983;ENSP00000370723;	9575
Homo_sapiens	TAL1	ENSG00000162367	bHLH	ENSP00000294339;ENSP00000360951;	6886
Homo_sapiens	HELT	ENSG00000187821	bHLH	ENSP00000422140;ENSP00000343464;ENSP00000426033;	391723
Homo_sapiens	DLX5	ENSG00000105880	Homeobox	ENSP00000222598;ENSP00000475008;	1749
Homo_sapiens	GTF2IRD2	ENSG00000196275	GTF2I	ENSP00000406723;ENSP00000486581;	84163
Homo_sapiens	HMGB1	ENSG00000189403	HMG	ENSP00000369904;ENSP00000345347;ENSP00000382412;ENSP00000343040;ENSP00000382417;ENSP00000384678;	3146
Homo_sapiens	HMX1	ENSG00000215612	Homeobox	ENSP00000383516;	3166
Homo_sapiens	GBX2	ENSG00000168505	Homeobox	ENSP00000302251;	2637
Homo_sapiens	NFIX	ENSG00000008441	CTF/NFI	ENSP00000465094;ENSP00000353219;ENSP00000466735;ENSP00000351354;ENSP00000468794;ENSP00000465616;ENSP00000467512;ENSP00000467785;ENSP00000468707;ENSP00000380781;ENSP00000466389;	4784
Homo_sapiens	ZNF646	ENSG00000167395	zf-C2H2	ENSP00000391271;ENSP00000300850;ENSP00000378429;	9726
Homo_sapiens	ZNF479	ENSG00000185177	zf-C2H2	ENSP00000333776;ENSP00000324518;ENSP00000478005;	90827
Homo_sapiens	AC073111.3	ENSG00000284041	zf-C2H2	ENSP00000419336;	-
Homo_sapiens	EVX1	ENSG00000106038	Homeobox	ENSP00000419266;	2128
Homo_sapiens	MZF1	ENSG00000099326	zf-C2H2	ENSP00000469493;ENSP00000215057;	7593
Homo_sapiens	RUNX3	ENSG00000020633	Runt	ENSP00000308051;ENSP00000343477;ENSP00000382800;	864
Homo_sapiens	HOXD12	ENSG00000170178	Homeobox	ENSP00000385586;	3238
Homo_sapiens	JUND	ENSG00000130522	TF_bZIP	ENSP00000252818;ENSP00000475153;	3727
Homo_sapiens	RXRB	ENSG00000204231	RXR-like	ENSP00000363817;ENSP00000363812;	6257
Homo_sapiens	ZNF208	ENSG00000160321	zf-C2H2	ENSP00000380315;ENSP00000476345;	7757
Homo_sapiens	ZNF383	ENSG00000188283	zf-C2H2	ENSP00000464871;ENSP00000466101;ENSP00000340132;	163087
Homo_sapiens	ESRRB	ENSG00000119715	ESR-like	ENSP00000370270;ENSP00000424992;ENSP00000493776;ENSP00000423004;ENSP00000494434;ENSP00000422488;	2103
Homo_sapiens	ZNF891	ENSG00000214029	zf-C2H2	ENSP00000437590;	101060200
Homo_sapiens	ZNF699	ENSG00000196110	zf-C2H2	ENSP00000311596;ENSP00000467723;	374879
Homo_sapiens	NR2E3	ENSG00000278570	RXR-like	ENSP00000482504;ENSP00000479254;ENSP00000479962;	10002
Homo_sapiens	ZNF335	ENSG00000198026	zf-C2H2	ENSP00000325326;	63925
Homo_sapiens	STAT1	ENSG00000115415	STAT	ENSP00000386244;ENSP00000376137;ENSP00000376136;ENSP00000354394;	6772
Homo_sapiens	GATAD2A	ENSG00000167491	zf-GATA	ENSP00000351552;ENSP00000384899;ENSP00000353463;	54815
Homo_sapiens	ZFPM1	ENSG00000179588	zf-C2H2	ENSP00000326630;	161882
Homo_sapiens	NFE2L2	ENSG00000116044	TF_bZIP	ENSP00000380252;ENSP00000411575;ENSP00000467401;ENSP00000380253;ENSP00000391590;	4780
Homo_sapiens	ZNF276	ENSG00000158805	zf-C2H2	ENSP00000415836;ENSP00000457210;ENSP00000289816;	92822
Homo_sapiens	ESRRG	ENSG00000196482	ESR-like	ENSP00000352077;ENSP00000419594;ENSP00000354584;ENSP00000417374;ENSP00000355907;ENSP00000419155;ENSP00000355904;ENSP00000386171;ENSP00000355225;ENSP00000355905;ENSP00000419514;ENSP00000481528;ENSP00000375761;ENSP00000418629;ENSP00000353108;	2104
Homo_sapiens	ZNF835	ENSG00000127903	zf-C2H2	ENSP00000444747;	90485
Homo_sapiens	TP53	ENSG00000141510	P53	ENSP00000425104;ENSP00000482903;ENSP00000481401;ENSP00000478219;ENSP00000481638;ENSP00000477531;ENSP00000481179;ENSP00000426252;ENSP00000482258;ENSP00000352610;ENSP00000473895;ENSP00000391127;ENSP00000424104;ENSP00000398846;ENSP00000484375;ENSP00000269305;ENSP00000410739;ENSP00000480868;ENSP00000478499;ENSP00000482222;ENSP00000423862;ENSP00000482537;ENSP00000488924;ENSP00000484409;ENSP00000391478;	7157
Homo_sapiens	ZNF514	ENSG00000144026	zf-C2H2	ENSP00000295208;ENSP00000405509;	84874
Homo_sapiens	ZFP82	ENSG00000181007	zf-C2H2	ENSP00000431265;	284406
Homo_sapiens	ZNF728	ENSG00000269067	zf-C2H2	ENSP00000471593;	388523
Homo_sapiens	PBX1	ENSG00000185630	Homeobox	ENSP00000453188;ENSP00000439943;ENSP00000405890;ENSP00000485692;ENSP00000483563;ENSP00000356872;ENSP00000452727;	5087
Homo_sapiens	NR1I3	ENSG00000143257	THR-like	ENSP00000421374;ENSP00000427175;ENSP00000412672;ENSP00000399361;ENSP00000426016;ENSP00000424834;ENSP00000356965;ENSP00000424345;ENSP00000424934;ENSP00000426292;ENSP00000356959;ENSP00000356963;ENSP00000487337;ENSP00000427600;ENSP00000425900;ENSP00000423007;ENSP00000356961;ENSP00000425417;ENSP00000427034;ENSP00000407446;ENSP00000422982;ENSP00000356960;ENSP00000423089;ENSP00000406493;ENSP00000423666…	9970
Homo_sapiens	ZNF780A	ENSG00000197782	zf-C2H2	ENSP00000472189;ENSP00000400997;ENSP00000387705;ENSP00000341507;ENSP00000469786;	284323
Homo_sapiens	NPAS2	ENSG00000170485	bHLH	ENSP00000388528;ENSP00000338283;ENSP00000395265;ENSP00000397595;	4862
Homo_sapiens	ZNF154	ENSG00000179909	zf-C2H2	ENSP00000469633;ENSP00000421258;	7710
Homo_sapiens	RERE	ENSG00000142599	zf-GATA	ENSP00000366684;ENSP00000465133;ENSP00000338629;ENSP00000383700;	473
Homo_sapiens	NFATC1	ENSG00000131196	RHD	ENSP00000466489;ENSP00000442435;ENSP00000468111;ENSP00000316553;ENSP00000380892;ENSP00000327850;ENSP00000253506;ENSP00000466194;ENSP00000389377;ENSP00000439992;ENSP00000467181;	4772
Homo_sapiens	SALL2	ENSG00000165821	zf-C2H2	ENSP00000483562;ENSP00000396773;ENSP00000440054;	6297
Homo_sapiens	ATF6	ENSG00000118217	TF_bZIP	ENSP00000356919;	22926
Homo_sapiens	PBX3	ENSG00000167081	Homeobox	ENSP00000362588;ENSP00000387456;ENSP00000362586;ENSP00000341990;	5090
Homo_sapiens	JARID2	ENSG00000008083	ARID	ENSP00000341280;ENSP00000380478;	3720
Homo_sapiens	PKNOX1	ENSG00000160199	Homeobox	ENSP00000402243;ENSP00000291547;	5316
Homo_sapiens	ELF5	ENSG00000135374	ETS	ENSP00000484521;ENSP00000407589;ENSP00000311010;ENSP00000257832;	2001
Homo_sapiens	ZNF714	ENSG00000160352	zf-C2H2	ENSP00000478345;ENSP00000479085;ENSP00000477828;ENSP00000484530;	148206
Homo_sapiens	NFIB	ENSG00000147862	CTF/NFI	ENSP00000475362;ENSP00000490945;ENSP00000380711;ENSP00000490020;ENSP00000380705;ENSP00000370340;ENSP00000490762;ENSP00000370321;ENSP00000496424;ENSP00000475813;ENSP00000490864;ENSP00000370311;ENSP00000489634;ENSP00000442888;ENSP00000490588;ENSP00000380709;ENSP00000370308;ENSP00000370346;ENSP00000490950;ENSP00000481181;	4781
Homo_sapiens	NR0B1	ENSG00000169297	Miscellaneous	ENSP00000368246;ENSP00000368253;	190
Homo_sapiens	ZNF664	ENSG00000179195	zf-C2H2	ENSP00000441405;ENSP00000376205;ENSP00000440645;ENSP00000337320;	144348
Homo_sapiens	DACH2	ENSG00000126733	DACH	ENSP00000420896;ENSP00000421919;ENSP00000422727;ENSP00000478116;ENSP00000362217;ENSP00000362223;	117154
Homo_sapiens	SOX15	ENSG00000129194	HMG	ENSP00000458286;ENSP00000439311;ENSP00000355354;	6665
Homo_sapiens	RBAK	ENSG00000146587	zf-C2H2	ENSP00000275423;ENSP00000380120;	57786
Homo_sapiens	ZNF14	ENSG00000105708	zf-C2H2	ENSP00000340514;	7561
Homo_sapiens	CDIP1	ENSG00000089486	zf-LITAF-like	ENSP00000382508;ENSP00000466186;ENSP00000455462;ENSP00000454994;ENSP00000455050;ENSP00000457877;	29965
Homo_sapiens	VSX1	ENSG00000100987	Homeobox	ENSP00000386612;ENSP00000365897;ENSP00000401690;ENSP00000387069;ENSP00000387720;ENSP00000365899;	30813
Homo_sapiens	HOXD13	ENSG00000128714	Homeobox	ENSP00000376322;	3239
Homo_sapiens	ZNF423	ENSG00000102935	zf-C2H2	ENSP00000455426;ENSP00000455061;ENSP00000455588;ENSP00000457928;ENSP00000262383;ENSP00000457664;ENSP00000442321;	23090
Homo_sapiens	ZNF552	ENSG00000178935	zf-C2H2	ENSP00000375582;	79818
Homo_sapiens	ZNF730	ENSG00000183850	zf-C2H2	ENSP00000472959;	100129543
Homo_sapiens	ZNF781	ENSG00000196381	zf-C2H2	ENSP00000351391;ENSP00000466370;	163115
Homo_sapiens	AC010616.1	ENSG00000268041	ETS	ENSP00000491574;	390937
Homo_sapiens	IRX1	ENSG00000170549	Homeobox	ENSP00000305244;	79192
Homo_sapiens	ARID1A	ENSG00000117713	ARID	ENSP00000478955;ENSP00000390317;ENSP00000387636;ENSP00000363267;ENSP00000489842;ENSP00000320485;	8289
Homo_sapiens	ZNF716	ENSG00000182111	zf-C2H2	ENSP00000394248;	441234
Homo_sapiens	PRDM12	ENSG00000130711	zf-C2H2	ENSP00000253008;	59335
Homo_sapiens	TSHZ2	ENSG00000182463	zf-C2H2	ENSP00000360552;ENSP00000333114;ENSP00000475114;	128553
Homo_sapiens	KLF13	ENSG00000169926	zf-C2H2	ENSP00000452609;ENSP00000302456;	51621
Homo_sapiens	FOXO6	ENSG00000204060	Fork_head	ENSP00000493184;	-
Homo_sapiens	IRX2	ENSG00000170561	Homeobox	ENSP00000372056;ENSP00000307006;	153572
Homo_sapiens	MYBL1	ENSG00000185697	MYB	ENSP00000429633;ENSP00000428011;ENSP00000428265;	4603
Homo_sapiens	CEBPA	ENSG00000245848	TF_bZIP	ENSP00000427514;	1050
Homo_sapiens	ZNF407	ENSG00000215421	zf-C2H2	ENSP00000310359;ENSP00000299687;ENSP00000481798;ENSP00000479246;ENSP00000463270;ENSP00000462348;	55628
Homo_sapiens	MIXL1	ENSG00000185155	Homeobox	ENSP00000355775;ENSP00000442439;	83881
Homo_sapiens	MEIS1	ENSG00000143995	Homeobox	ENSP00000454209;ENSP00000475161;ENSP00000272369;ENSP00000440571;ENSP00000381518;	4211
Homo_sapiens	ZNF671	ENSG00000083814	zf-C2H2	ENSP00000321848;	79891
Homo_sapiens	AC138696.1	ENSG00000264668	zf-C2H2	ENSP00000428966;	-
Homo_sapiens	ZNF630	ENSG00000221994	zf-C2H2	ENSP00000354683;ENSP00000480858;ENSP00000393163;ENSP00000386393;	57232
Homo_sapiens	ZNF524	ENSG00000171443	zf-C2H2	ENSP00000301073;ENSP00000466907;	147807
Homo_sapiens	MEF2B	ENSG00000213999	SRF	ENSP00000386480;ENSP00000402154;ENSP00000386784;ENSP00000386374;	100271849
Homo_sapiens	ZNF662	ENSG00000182983	zf-C2H2	ENSP00000329264;ENSP00000405047;	389114
Homo_sapiens	ZNF534	ENSG00000198633	zf-C2H2	ENSP00000391358;ENSP00000327538;	147658
Homo_sapiens	PRDM5	ENSG00000138738	zf-C2H2	ENSP00000404832;ENSP00000424861;ENSP00000422309;ENSP00000264808;	11107
Homo_sapiens	TOX2	ENSG00000124191	HMG	ENSP00000390278;ENSP00000344724;ENSP00000362090;ENSP00000350849;	84969
Homo_sapiens	ZNF415	ENSG00000170954	zf-C2H2	ENSP00000395055;ENSP00000439435;ENSP00000472911;ENSP00000243643;	55786
Homo_sapiens	ZBTB20	ENSG00000181722	ZBTB	ENSP00000420324;ENSP00000420324;ENSP00000418092;ENSP00000418092;ENSP00000377375;ENSP00000377375;ENSP00000349803;ENSP00000349803;ENSP00000419153;ENSP00000419153;ENSP00000419902;ENSP00000417307;	26137
Homo_sapiens	ZNF740	ENSG00000139651	zf-C2H2	ENSP00000409463;	283337
Homo_sapiens	SPIC	ENSG00000166211	ETS	ENSP00000448580;	121599
Homo_sapiens	TBX15	ENSG00000092607	T-box	ENSP00000207157;ENSP00000358437;	6913
Homo_sapiens	ZNF766	ENSG00000196214	zf-C2H2	ENSP00000409652;ENSP00000468950;	90321
Homo_sapiens	ZNF25	ENSG00000175395	zf-C2H2	ENSP00000302222;	219749
Homo_sapiens	PMS1	ENSG00000064933	HMG	ENSP00000401064;ENSP00000406490;ENSP00000491236;ENSP00000389938;ENSP00000485312;ENSP00000398378;ENSP00000387125;ENSP00000404492;ENSP00000387169;ENSP00000406225;	5378
Homo_sapiens	MYC	ENSG00000136997	bHLH	ENSP00000367207;ENSP00000430235;ENSP00000479618;ENSP00000478887;	4609
Homo_sapiens	SIX6	ENSG00000184302	Homeobox	ENSP00000328596;	4990
Homo_sapiens	POU2F3	ENSG00000137709	Pou	ENSP00000441687;ENSP00000260264;ENSP00000453150;	25833
Homo_sapiens	EHF	ENSG00000135373	ETS	ENSP00000433508;ENSP00000435837;ENSP00000435835;ENSP00000399733;ENSP00000257831;	26298
Homo_sapiens	ZNF544	ENSG00000198131	zf-C2H2	ENSP00000469635;ENSP00000469514;ENSP00000471684;ENSP00000269829;ENSP00000472721;	27300
Homo_sapiens	NANOGNB	ENSG00000205857	Homeobox	ENSP00000492127;ENSP00000371553;	360030
Homo_sapiens	ZBTB43	ENSG00000169155	ZBTB	ENSP00000362563;ENSP00000362563;ENSP00000362556;ENSP00000390344;ENSP00000412145;	23099
Homo_sapiens	ZNF536	ENSG00000198597	zf-C2H2	ENSP00000465771;ENSP00000347730;	9745
Homo_sapiens	ZNF440	ENSG00000171295	zf-C2H2	ENSP00000393489;ENSP00000305373;	126070
Homo_sapiens	RORB	ENSG00000198963	THR-like	ENSP00000366093;ENSP00000379507;	6096
Homo_sapiens	ZNF844	ENSG00000223547	zf-C2H2	ENSP00000448588;ENSP00000392024;	284391
Homo_sapiens	ZNF263	ENSG00000006194	zf-C2H2	ENSP00000461146;ENSP00000444497;ENSP00000461755;ENSP00000219069;	10127
Homo_sapiens	ZNF846	ENSG00000196605	zf-C2H2	ENSP00000467891;ENSP00000465467;ENSP00000380999;	100505555
Homo_sapiens	MTA2	ENSG00000149480	zf-GATA	ENSP00000278823;ENSP00000431346;ENSP00000431797;	9219
Homo_sapiens	CBFB	ENSG00000067955	CBF	ENSP00000415151;ENSP00000462273;ENSP00000456637;ENSP00000462148;ENSP00000462932;ENSP00000290858;	865
Homo_sapiens	NPAS1	ENSG00000130751	bHLH	ENSP00000405290;ENSP00000469142;	4861
Homo_sapiens	AC022167.5	ENSG00000283516	zf-LITAF-like	ENSP00000490446;ENSP00000489792;ENSP00000490685;	-
Homo_sapiens	ZNF57	ENSG00000171970	zf-C2H2	ENSP00000478776;ENSP00000430223;ENSP00000303696;	126295
Homo_sapiens	EN2	ENSG00000164778	Homeobox	ENSP00000297375;	2020
Homo_sapiens	ZFPM2	ENSG00000169946	zf-C2H2	ENSP00000428720;ENSP00000430757;ENSP00000384179;	23414
Homo_sapiens	HESX1	ENSG00000163666	Homeobox	ENSP00000295934;	8820
Homo_sapiens	SP3	ENSG00000172845	zf-C2H2	ENSP00000492253;ENSP00000406140;ENSP00000413665;ENSP00000310301;	6670
Homo_sapiens	E2F8	ENSG00000129173	E2F	ENSP00000481103;ENSP00000434199;ENSP00000250024;	79733
Homo_sapiens	ZNF563	ENSG00000188868	zf-C2H2	ENSP00000469879;ENSP00000293725;ENSP00000471960;	147837
Homo_sapiens	MAFK	ENSG00000198517	TF_bZIP	ENSP00000385437;ENSP00000386009;ENSP00000344903;	7975
Homo_sapiens	ZNF569	ENSG00000196437	zf-C2H2	ENSP00000325018;ENSP00000375992;ENSP00000466221;ENSP00000375993;	148266
Homo_sapiens	ZNF300	ENSG00000145908	zf-C2H2	ENSP00000397178;ENSP00000274599;ENSP00000392593;ENSP00000377773;	91975
Homo_sapiens	HES7	ENSG00000179111	bHLH	ENSP00000314774;ENSP00000446205;ENSP00000462491;	84667
Homo_sapiens	NR1I2	ENSG00000144852	THR-like	ENSP00000336528;ENSP00000377319;ENSP00000492264;ENSP00000420297;ENSP00000492881;	8856
Homo_sapiens	SOX7	ENSG00000171056	HMG	ENSP00000301921;	83595
Homo_sapiens	ZBTB39	ENSG00000166860	ZBTB	ENSP00000300101;ENSP00000300101;	9880
Homo_sapiens	ZNF398	ENSG00000197024	zf-C2H2	ENSP00000389972;ENSP00000418564;ENSP00000419391;ENSP00000420418;	57541
Homo_sapiens	ZNF420	ENSG00000197050	zf-C2H2	ENSP00000338770;ENSP00000468736;ENSP00000468387;ENSP00000306102;ENSP00000467772;	147923
Homo_sapiens	NCOR1	ENSG00000141027	MYB	ENSP00000379189;ENSP00000268712;ENSP00000379192;ENSP00000379198;	9611
Homo_sapiens	SHOX	ENSG00000185960	Homeobox	ENSP00000370987;ENSP00000370990;ENSP00000335505;	6473
Homo_sapiens	CEBPE	ENSG00000092067	TF_bZIP	ENSP00000206513;	1053
Homo_sapiens	LITAF	ENSG00000189067	zf-LITAF-like	ENSP00000461813;ENSP00000460133;ENSP00000458871;ENSP00000459533;ENSP00000461667;ENSP00000459138;ENSP00000371231;ENSP00000458836;ENSP00000458981;ENSP00000340118;ENSP00000397958;ENSP00000481589;ENSP00000483114;ENSP00000460743;	9516
Homo_sapiens	SEBOX	ENSG00000274529	Homeobox	ENSP00000444503;	645832
Homo_sapiens	ZBTB11	ENSG00000066422	ZBTB	ENSP00000326200;ENSP00000326200;	27107
Homo_sapiens	FOXP2	ENSG00000128573	Fork_head	ENSP00000489229;ENSP00000377132;ENSP00000377130;ENSP00000385069;ENSP00000377129;ENSP00000377135;ENSP00000386200;ENSP00000489135;ENSP00000489073;ENSP00000488944;ENSP00000265436;	93986
Homo_sapiens	TLX2	ENSG00000115297	Homeobox	ENSP00000233638;	3196
Homo_sapiens	TOX3	ENSG00000103460	HMG	ENSP00000219746;ENSP00000385705;	27324
Homo_sapiens	NR3C2	ENSG00000151623	ESR-like	ENSP00000423510;ENSP00000341390;ENSP00000343907;ENSP00000350815;ENSP00000421481;ENSP00000486719;	4306
Homo_sapiens	POU5F1	ENSG00000204531	Pou	ENSP00000484778;ENSP00000389359;ENSP00000425479;ENSP00000475512;ENSP00000475880;ENSP00000259915;ENSP00000425083;	5460
Homo_sapiens	ZNF573	ENSG00000189144	zf-C2H2	ENSP00000349861;ENSP00000340171;ENSP00000375983;ENSP00000465020;ENSP00000440464;	126231
Homo_sapiens	ZNF350	ENSG00000256683	zf-C2H2	ENSP00000243644;	59348
Homo_sapiens	ZNF324	ENSG00000083812	zf-C2H2	ENSP00000471778;ENSP00000196482;ENSP00000444812;	25799
Homo_sapiens	ZBTB32	ENSG00000011590	ZBTB	ENSP00000262630;ENSP00000262630;ENSP00000376035;ENSP00000376035;ENSP00000466524;	27033
Homo_sapiens	ZNF394	ENSG00000160908	zf-C2H2	ENSP00000337363;	84124
Homo_sapiens	FOXD4L5	ENSG00000204779	Fork_head	ENSP00000366637;	653427
Homo_sapiens	AHRR	ENSG00000063438	bHLH	ENSP00000428893;ENSP00000424601;ENSP00000429944;ENSP00000323816;ENSP00000430842;	57491
Homo_sapiens	PRDM4	ENSG00000110851	zf-C2H2	ENSP00000228437;	11108
Homo_sapiens	GFI1B	ENSG00000165702	zf-C2H2	ENSP00000361195;ENSP00000490303;ENSP00000361196;ENSP00000489646;ENSP00000344782;	8328
Homo_sapiens	ZNF341	ENSG00000131061	zf-C2H2	ENSP00000344308;ENSP00000364346;ENSP00000432933;	84905
Homo_sapiens	KLF15	ENSG00000163884	zf-C2H2	ENSP00000296233;	28999
Homo_sapiens	ZMIZ1	ENSG00000108175	zf-MIZ	ENSP00000401558;ENSP00000334474;	57178
Homo_sapiens	ZSCAN4	ENSG00000180532	zf-C2H2	ENSP00000480210;ENSP00000321963;	201516
Homo_sapiens	ZNF850	ENSG00000267041	zf-C2H2	ENSP00000464976;ENSP00000483509;	342892
Homo_sapiens	ZNF256	ENSG00000152454	zf-C2H2	ENSP00000282308;	10172
Homo_sapiens	ZBTB46	ENSG00000130584	ZBTB	ENSP00000303102;ENSP00000303102;ENSP00000245663;ENSP00000245663;ENSP00000378536;	140685
Homo_sapiens	HSFY1	ENSG00000172468	HSF	ENSP00000342302;ENSP00000311166;ENSP00000303599;ENSP00000372307;	86614
Homo_sapiens	HSFY2	ENSG00000169953	HSF	ENSP00000372303;ENSP00000306549;ENSP00000340971;	159119
Homo_sapiens	HOXC8	ENSG00000037965	Homeobox	ENSP00000040584;	3224
Homo_sapiens	ZNF33A	ENSG00000189180	zf-C2H2	ENSP00000485869;ENSP00000363747;ENSP00000304268;ENSP00000402467;ENSP00000387713;	7581
Homo_sapiens	ARNTL	ENSG00000133794	bHLH	ENSP00000431488;ENSP00000385915;ENSP00000433571;ENSP00000374357;ENSP00000436313;ENSP00000385581;ENSP00000384517;ENSP00000436721;ENSP00000385897;	406
Homo_sapiens	RLF	ENSG00000117000	zf-C2H2	ENSP00000361857;	6018
Homo_sapiens	SOX1	ENSG00000182968	HMG	ENSP00000330218;	6656
Homo_sapiens	DMRT3	ENSG00000064218	DM	ENSP00000190165;	58524
Homo_sapiens	ZNF624	ENSG00000197566	zf-C2H2	ENSP00000310472;	57547
Homo_sapiens	NPAS4	ENSG00000174576	bHLH	ENSP00000492526;ENSP00000433135;ENSP00000311196;	266743
Homo_sapiens	ZSCAN30	ENSG00000186814	zf-C2H2	ENSP00000329738;ENSP00000480152;ENSP00000392371;ENSP00000491237;	100101467
Homo_sapiens	GLIS1	ENSG00000174332	zf-C2H2	ENSP00000486112;ENSP00000309653;	148979
Homo_sapiens	ZNF146	ENSG00000167635	zf-C2H2	ENSP00000400391;ENSP00000392095;	7705
Homo_sapiens	FOXM1	ENSG00000111206	Fork_head	ENSP00000342307;ENSP00000354492;ENSP00000442309;ENSP00000352901;ENSP00000486536;	2305
Homo_sapiens	AC092329.3	ENSG00000283201	zf-C2H2	ENSP00000478939;	-
Homo_sapiens	SIX2	ENSG00000170577	Homeobox	ENSP00000304502;	10736
Homo_sapiens	KLF18	ENSG00000283039	zf-C2H2	ENSP00000489024;	105378952
Homo_sapiens	MESP1	ENSG00000166823	bHLH	ENSP00000300057;	55897
Homo_sapiens	BHLHE40	ENSG00000134107	bHLH	ENSP00000256495;	8553
Homo_sapiens	ZNF483	ENSG00000173258	zf-C2H2	ENSP00000311679;	158399
Homo_sapiens	HES3	ENSG00000173673	bHLH	ENSP00000367130;	390992
Homo_sapiens	RUNX1	ENSG00000159216	Runt	ENSP00000388189;ENSP00000382184;ENSP00000409227;ENSP00000351123;ENSP00000382182;ENSP00000300305;ENSP00000340690;	100506403
Homo_sapiens	ZNF430	ENSG00000118620	zf-C2H2	ENSP00000261560;ENSP00000469787;	80264
Homo_sapiens	MYNN	ENSG00000085274	ZBTB	ENSP00000326240;ENSP00000326240;ENSP00000473335;ENSP00000440637;ENSP00000473654;ENSP00000349150;	55892
Homo_sapiens	HSFX4	ENSG00000283463	HSF	ENSP00000489814;	101927685
Homo_sapiens	ZNF711	ENSG00000147180	zf-C2H2	ENSP00000276123;ENSP00000362260;ENSP00000353922;	7552
Homo_sapiens	TBX5	ENSG00000089225	T-box	ENSP00000384152;ENSP00000337723;ENSP00000309913;ENSP00000433292;	6910
Homo_sapiens	POU6F2	ENSG00000106536	Pou	ENSP00000430514;ENSP00000452633;ENSP00000384004;	11281
Homo_sapiens	RXRA	ENSG00000186350	RXR-like	ENSP00000419692;	6256
Homo_sapiens	WDHD1	ENSG00000198554	HMG	ENSP00000399349;ENSP00000353793;	11169
Homo_sapiens	LBX2	ENSG00000179528	Homeobox	ENSP00000366789;ENSP00000417116;	85474
Homo_sapiens	ZNF764	ENSG00000169951	zf-C2H2	ENSP00000252797;ENSP00000378526;	92595
Homo_sapiens	RFX6	ENSG00000185002	RFX	ENSP00000332208;	222546
Homo_sapiens	SOX17	ENSG00000164736	HMG	ENSP00000297316;	64321
Homo_sapiens	ZFP91-CNTF	ENSG00000255073	zf-C2H2	ENSP00000455911;ENSP00000457288;	-
Homo_sapiens	ZHX1	ENSG00000165156	Homeobox	ENSP00000297857;ENSP00000378938;ENSP00000428821;	11244
Homo_sapiens	ZNF48	ENSG00000180035	zf-C2H2	ENSP00000324056;ENSP00000480262;ENSP00000432548;ENSP00000479658;ENSP00000435674;	197407
Homo_sapiens	SP7	ENSG00000170374	zf-C2H2	ENSP00000441367;ENSP00000302812;ENSP00000443827;	121340
Homo_sapiens	CSRNP1	ENSG00000144655	CSRNP_N	ENSP00000273153;ENSP00000422532;	64651
Homo_sapiens	DLX6	ENSG00000006377	Homeobox	ENSP00000451635;ENSP00000428480;	1750
Homo_sapiens	HSF1	ENSG00000185122	HSF	ENSP00000383590;ENSP00000431512;ENSP00000436616;	3297
Homo_sapiens	ERG	ENSG00000157554	ETS	ENSP00000288319;ENSP00000396268;ENSP00000381882;ENSP00000381877;ENSP00000381881;ENSP00000381879;ENSP00000381871;ENSP00000414150;ENSP00000394694;ENSP00000381891;	2078
Homo_sapiens	MAF	ENSG00000178573	TF_bZIP	ENSP00000327048;ENSP00000377019;ENSP00000455097;	4094
Homo_sapiens	ZNF404	ENSG00000176222	zf-C2H2	ENSP00000319479;ENSP00000466051;	342908
Homo_sapiens	AL033529.1	ENSG00000254553	ZBTB	ENSP00000455300;ENSP00000455300;	-
Homo_sapiens	ZNF275	ENSG00000063587	zf-C2H2	ENSP00000359271;ENSP00000359269;	105373378
Homo_sapiens	RFX3	ENSG00000080298	RFX	ENSP00000351574;ENSP00000482598;ENSP00000303847;ENSP00000405664;ENSP00000371434;	5991
Homo_sapiens	MAZ	ENSG00000103495	zf-C2H2	ENSP00000458201;ENSP00000443956;ENSP00000313362;ENSP00000455913;ENSP00000461630;ENSP00000219782;ENSP00000480440;ENSP00000460057;ENSP00000455794;	4150
Homo_sapiens	IKZF5	ENSG00000095574	zf-C2H2	ENSP00000478056;ENSP00000357881;	64376
Homo_sapiens	KLF9	ENSG00000119138	zf-C2H2	ENSP00000366330;	687
Homo_sapiens	ZNF665	ENSG00000197497	zf-C2H2	ENSP00000469154;ENSP00000379702;	79788
Homo_sapiens	ZNF682	ENSG00000197124	zf-C2H2	ENSP00000470718;ENSP00000471717;ENSP00000380351;ENSP00000380348;ENSP00000351324;	91120
Homo_sapiens	ZNF566	ENSG00000186017	zf-C2H2	ENSP00000465343;ENSP00000401259;ENSP00000376010;ENSP00000411526;ENSP00000467764;ENSP00000415520;	84924
Homo_sapiens	FOXB1	ENSG00000171956	Fork_head	ENSP00000379369;	27023
Homo_sapiens	DBX2	ENSG00000185610	Homeobox	ENSP00000331470;	440097
Homo_sapiens	FOXG1	ENSG00000176165	Fork_head	ENSP00000339004;	2290
Homo_sapiens	JUNB	ENSG00000171223	TF_bZIP	ENSP00000303315;	3726
Homo_sapiens	DPRX	ENSG00000204595	Homeobox	ENSP00000365838;	503834
Homo_sapiens	MAFF	ENSG00000185022	TF_bZIP	ENSP00000416493;ENSP00000345393;ENSP00000388882;ENSP00000442060;ENSP00000391589;ENSP00000441482;ENSP00000384094;	23764
Homo_sapiens	SRY	ENSG00000184895	HMG	ENSP00000372547;	6736
Homo_sapiens	FOXP4	ENSG00000137166	Fork_head	ENSP00000362154;ENSP00000386958;ENSP00000309823;ENSP00000362151;ENSP00000362148;	116113
Homo_sapiens	MYRF	ENSG00000124920	NDT80/PhoG	ENSP00000265460;ENSP00000278836;	745
Homo_sapiens	AFF2	ENSG00000155966	AF-4	ENSP00000286437;ENSP00000359487;ENSP00000359486;ENSP00000345459;ENSP00000359489;	2334
Homo_sapiens	OVOL2	ENSG00000125850	zf-C2H2	ENSP00000278780;	58495
Homo_sapiens	TGIF2LY	ENSG00000176679	Homeobox	ENSP00000318502;ENSP00000453750;	90655
Homo_sapiens	ZSCAN29	ENSG00000140265	zf-C2H2	ENSP00000456883;ENSP00000380174;	146050
Homo_sapiens	ZNF852	ENSG00000178917	zf-C2H2	ENSP00000389841;	285346
Homo_sapiens	TCF23	ENSG00000163792	bHLH	ENSP00000296096;	150921
Homo_sapiens	FOSB	ENSG00000125740	TF_bZIP	ENSP00000466530;ENSP00000468207;ENSP00000465552;ENSP00000465528;ENSP00000485018;ENSP00000468482;ENSP00000245919;	2354
Homo_sapiens	BHMG1	ENSG00000237452	HMG	ENSP00000402674;	388553
Homo_sapiens	NKX2-2	ENSG00000125820	Homeobox	ENSP00000366347;	4821
Homo_sapiens	POU3F2	ENSG00000184486	Pou	ENSP00000329170;	5454
Homo_sapiens	NR2F6	ENSG00000160113	RXR-like	ENSP00000291442;ENSP00000471686;	2063
Homo_sapiens	BCL11A	ENSG00000119866	zf-C2H2	ENSP00000496168;ENSP00000338774;ENSP00000351307;ENSP00000349300;	53335
Homo_sapiens	AC115220.1	ENSG00000241149	zf-C2H2	ENSP00000492202;	-
Homo_sapiens	ZNF268	ENSG00000090612	zf-C2H2	ENSP00000444412;ENSP00000228289;	10795
Homo_sapiens	TULP4	ENSG00000130338	Tub	ENSP00000356064;	56995
Homo_sapiens	ASCL5	ENSG00000232237	bHLH	ENSP00000469019;ENSP00000472681;	647219
Homo_sapiens	HIC1	ENSG00000177374	ZBTB	ENSP00000314080;ENSP00000314080;ENSP00000467045;ENSP00000382742;ENSP00000477858;	3090
Homo_sapiens	ZBTB45	ENSG00000119574	ZBTB	ENSP00000346603;ENSP00000346603;ENSP00000469089;ENSP00000470316;ENSP00000473072;	84878
Homo_sapiens	ZNF836	ENSG00000196267	zf-C2H2	ENSP00000325038;ENSP00000470239;	162962
Homo_sapiens	ZNF670	ENSG00000277462	zf-C2H2	ENSP00000355459;	93474
Homo_sapiens	ZFHX2	ENSG00000136367	Homeobox	ENSP00000413418;	85446
Homo_sapiens	FOXF2	ENSG00000137273	Fork_head	ENSP00000259806;ENSP00000496415;	2295
Homo_sapiens	SMARCE1	ENSG00000073584	HMG	ENSP00000495857;ENSP00000496445;ENSP00000493649;ENSP00000367039;ENSP00000494537;ENSP00000493974;ENSP00000463282;ENSP00000464061;ENSP00000463216;ENSP00000496311;ENSP00000411607;ENSP00000462475;ENSP00000445370;ENSP00000464511;ENSP00000494214;ENSP00000323967;ENSP00000496546;ENSP00000496097;ENSP00000496094;ENSP00000496661;ENSP00000466608;ENSP00000495021;ENSP00000494771;ENSP00000392958;ENSP00000462857;	6605
Homo_sapiens	ZNF789	ENSG00000198556	zf-C2H2	ENSP00000331927;	285989
Homo_sapiens	MYT1L	ENSG00000186487	zf-C2HC	ENSP00000384219;ENSP00000382111;ENSP00000473409;ENSP00000496210;ENSP00000396103;ENSP00000382114;	23040
Homo_sapiens	ZNF24	ENSG00000172466	zf-C2H2	ENSP00000382015;ENSP00000261332;	7572
Homo_sapiens	TBX3	ENSG00000135111	T-box	ENSP00000257567;ENSP00000257566;	6926
Homo_sapiens	NEUROD4	ENSG00000123307	bHLH	ENSP00000242994;	58158
Homo_sapiens	AR	ENSG00000169083	ESR-like	ENSP00000484033;ENSP00000421155;ENSP00000379358;ENSP00000425199;ENSP00000363822;ENSP00000482407;ENSP00000379359;	367
Homo_sapiens	MBD2	ENSG00000134046	MBD	ENSP00000381435;ENSP00000464554;ENSP00000256429;	8932
Homo_sapiens	ZNF189	ENSG00000136870	zf-C2H2	ENSP00000259395;ENSP00000342019;ENSP00000363995;	7743
Homo_sapiens	PHOX2A	ENSG00000165462	Homeobox	ENSP00000298231;ENSP00000444845;	401
Homo_sapiens	ZFP64	ENSG00000020256	zf-C2H2	ENSP00000344615;ENSP00000355179;ENSP00000379312;ENSP00000216923;ENSP00000403424;ENSP00000360570;ENSP00000360578;ENSP00000360573;	55734
Homo_sapiens	SMAD6	ENSG00000137834	MH1	ENSP00000452955;ENSP00000288840;	4091
Homo_sapiens	THAP10	ENSG00000129028	THAP	ENSP00000249861;	56906
Homo_sapiens	AC073111.5	ENSG00000284691	zf-C2H2	ENSP00000492887;ENSP00000493097;ENSP00000493012;	-
Homo_sapiens	FOXD4L3	ENSG00000187559	Fork_head	ENSP00000341961;	286380
Homo_sapiens	TP73	ENSG00000078900	P53	ENSP00000367537;ENSP00000367534;ENSP00000340740;ENSP00000367529;ENSP00000474322;ENSP00000367539;ENSP00000367545;ENSP00000346423;ENSP00000474626;ENSP00000350366;ENSP00000475143;	7161
Homo_sapiens	ZNF587B	ENSG00000269343	zf-C2H2	ENSP00000472004;ENSP00000392410;ENSP00000469623;	100293516
Homo_sapiens	HOXB13	ENSG00000159184	Homeobox	ENSP00000290295;	10481
Homo_sapiens	BHLHA9	ENSG00000205899	bHLH	ENSP00000375248;	727857
Homo_sapiens	ZNF184	ENSG00000096654	zf-C2H2	ENSP00000366636;ENSP00000211936;	7738
Homo_sapiens	ZNF471	ENSG00000196263	zf-C2H2	ENSP00000309161;	57573
Homo_sapiens	HOXA5	ENSG00000106004	Homeobox	ENSP00000222726;	3202
Homo_sapiens	ZNF362	ENSG00000160094	zf-C2H2	ENSP00000446335;ENSP00000362527;	149076
Homo_sapiens	ZBTB17	ENSG00000116809	ZBTB	ENSP00000438529;ENSP00000408483;ENSP00000364895;ENSP00000364895;ENSP00000400827;ENSP00000364885;ENSP00000364885;	7709
Homo_sapiens	ZNF160	ENSG00000170949	zf-C2H2	ENSP00000470961;ENSP00000406201;ENSP00000469393;ENSP00000470573;ENSP00000409597;	90338
Homo_sapiens	GABPA	ENSG00000154727	ETS	ENSP00000346886;ENSP00000382948;	2551
Homo_sapiens	ZNF142	ENSG00000115568	zf-C2H2	ENSP00000408643;ENSP00000415156;ENSP00000398798;	7701
Homo_sapiens	ZNF771	ENSG00000179965	zf-C2H2	ENSP00000323945;ENSP00000416197;	51333
Homo_sapiens	THAP12	ENSG00000137492	THAP	ENSP00000433966;ENSP00000260045;	5612
Homo_sapiens	HMX3	ENSG00000188620	Homeobox	ENSP00000350549;	340784
Homo_sapiens	ZNF736	ENSG00000234444	zf-C2H2	ENSP00000347210;ENSP00000400852;	728927
Homo_sapiens	ZFP14	ENSG00000142065	zf-C2H2	ENSP00000270001;	57677
Homo_sapiens	RORA	ENSG00000069667	THR-like	ENSP00000402971;ENSP00000453322;ENSP00000261523;ENSP00000335087;ENSP00000309753;	6095
Homo_sapiens	PAX4	ENSG00000106331	PAX	ENSP00000491782;ENSP00000477877;ENSP00000344297;ENSP00000451923;ENSP00000339906;ENSP00000368014;ENSP00000473846;	5078
Homo_sapiens	ZBTB4	ENSG00000174282	ZBTB	ENSP00000307858;ENSP00000307858;ENSP00000369973;ENSP00000369973;	57659
Homo_sapiens	HOXC4	ENSG00000198353	Homeobox	ENSP00000305973;ENSP00000399808;	3221
Homo_sapiens	CREB5	ENSG00000146592	TF_bZIP	ENSP00000379593;ENSP00000387197;ENSP00000379592;ENSP00000350359;ENSP00000379594;	9586
Homo_sapiens	POU4F1	ENSG00000152192	Pou	ENSP00000366413;	5457
Homo_sapiens	KLF12	ENSG00000118922	zf-C2H2	ENSP00000366897;	11278
Homo_sapiens	ZNF345	ENSG00000251247	zf-C2H2	ENSP00000491547;ENSP00000465431;ENSP00000431202;ENSP00000482400;ENSP00000331120;ENSP00000477522;ENSP00000466374;ENSP00000431216;ENSP00000465851;	25850
Homo_sapiens	TEAD1	ENSG00000187079	TEA	ENSP00000334754;ENSP00000435977;ENSP00000435233;ENSP00000432587;ENSP00000491500;	7003
Homo_sapiens	LMX1B	ENSG00000136944	Homeobox	ENSP00000347684;ENSP00000453580;ENSP00000436930;ENSP00000362573;	4010
Homo_sapiens	PIAS1	ENSG00000033800	zf-MIZ	ENSP00000249636;ENSP00000438574;	8554
Homo_sapiens	NR1H2	ENSG00000131408	THR-like	ENSP00000472526;ENSP00000471194;ENSP00000471294;ENSP00000470518;ENSP00000472138;ENSP00000396151;ENSP00000472271;ENSP00000469778;ENSP00000253727;	7376
Homo_sapiens	ZNF324B	ENSG00000249471	zf-C2H2	ENSP00000438930;ENSP00000337473;	388569
Homo_sapiens	MYCN	ENSG00000134323	bHLH	ENSP00000281043;ENSP00000491476;	4613
Homo_sapiens	ZNF175	ENSG00000105497	zf-C2H2	ENSP00000262259;	7728
Homo_sapiens	VENTX	ENSG00000151650	Homeobox	ENSP00000357556;	27287
Homo_sapiens	ZNF559-ZNF177	ENSG00000270011	zf-C2H2	ENSP00000445323;	100529215
Homo_sapiens	VDR	ENSG00000111424	THR-like	ENSP00000229022;ENSP00000449074;ENSP00000449573;ENSP00000447173;ENSP00000448659;ENSP00000450105;ENSP00000378734;ENSP00000449561;	7421
Homo_sapiens	ZNF546	ENSG00000187187	zf-C2H2	ENSP00000469540;ENSP00000339823;	339327
Homo_sapiens	AFF3	ENSG00000144218	AF-4	ENSP00000395068;ENSP00000317421;ENSP00000399795;ENSP00000406484;ENSP00000386834;ENSP00000411383;ENSP00000414099;ENSP00000396582;ENSP00000387207;ENSP00000416685;ENSP00000393732;	3899
Homo_sapiens	MBD1	ENSG00000141644	MBD	ENSP00000381502;ENSP00000468785;ENSP00000269471;ENSP00000339546;ENSP00000464823;ENSP00000467763;ENSP00000381506;ENSP00000372407;ENSP00000465923;ENSP00000285102;ENSP00000405268;ENSP00000381508;ENSP00000468042;ENSP00000466092;ENSP00000467017;ENSP00000269468;ENSP00000468430;ENSP00000269469;	4152
Homo_sapiens	KLF16	ENSG00000129911	zf-C2H2	ENSP00000483701;ENSP00000439973;ENSP00000480570;ENSP00000250916;	83855
Homo_sapiens	ZNF737	ENSG00000237440	zf-C2H2	ENSP00000471995;ENSP00000471784;ENSP00000395733;	100129842
Homo_sapiens	ZNF169	ENSG00000175787	zf-C2H2	ENSP00000378792;	169841
Homo_sapiens	ZNF695	ENSG00000197472	zf-C2H2	ENSP00000341236;	57116
Homo_sapiens	SP5	ENSG00000204335	zf-C2H2	ENSP00000364430;	389058
Homo_sapiens	CAMTA2	ENSG00000108509	CG-1	ENSP00000459519;ENSP00000458560;ENSP00000354828;ENSP00000460751;ENSP00000460779;ENSP00000370712;ENSP00000412886;ENSP00000321813;	23125
Homo_sapiens	SOX6	ENSG00000110693	HMG	ENSP00000324948;ENSP00000433233;ENSP00000379644;ENSP00000432134;ENSP00000434455;	55553
Homo_sapiens	CAMTA1	ENSG00000171735	CG-1	ENSP00000306522;	23261
Homo_sapiens	DDIT3	ENSG00000175197	TF_bZIP	ENSP00000494844;ENSP00000448665;ENSP00000340671;ENSP00000447803;ENSP00000447188;	1649
Homo_sapiens	ZNF525	ENSG00000203326	zf-C2H2	ENSP00000419136;ENSP00000417696;	170958
Homo_sapiens	LEUTX	ENSG00000213921	Homeobox	ENSP00000380053;ENSP00000491740;	342900
Homo_sapiens	AC092835.1	ENSG00000233757	zf-C2H2	ENSP00000478941;	-
Homo_sapiens	ZKSCAN7	ENSG00000196345	zf-C2H2	ENSP00000405034;ENSP00000395524;ENSP00000273320;	55888
Homo_sapiens	ZNF285	ENSG00000267508	zf-C2H2	ENSP00000483662;ENSP00000464788;ENSP00000439431;	26974
Homo_sapiens	RCOR2	ENSG00000167771	MYB	ENSP00000301459;	283248
Homo_sapiens	ARGFX	ENSG00000186103	Homeobox	ENSP00000335578;	503582
Homo_sapiens	ZNF30	ENSG00000168661	zf-C2H2	ENSP00000403441;ENSP00000469954;ENSP00000303889;	90075
Homo_sapiens	MNX1	ENSG00000130675	Homeobox	ENSP00000438552;ENSP00000401158;ENSP00000252971;	3110
Homo_sapiens	MYF5	ENSG00000111049	bHLH	ENSP00000228644;	4617
Homo_sapiens	ZNF354B	ENSG00000178338	zf-C2H2	ENSP00000327143;	117608
Homo_sapiens	NKX3-1	ENSG00000167034	Homeobox	ENSP00000370253;ENSP00000429729;	4824
Homo_sapiens	KLF3	ENSG00000109787	zf-C2H2	ENSP00000261438;	51274
Homo_sapiens	FOXD4L1	ENSG00000184492	Fork_head	ENSP00000302756;	200350
Homo_sapiens	PITX2	ENSG00000164093	Homeobox	ENSP00000484909;ENSP00000347192;ENSP00000495061;ENSP00000347004;ENSP00000378097;ENSP00000475617;ENSP00000304169;ENSP00000484763;ENSP00000421454;ENSP00000424142;ENSP00000378095;ENSP00000481951;	5308
Homo_sapiens	ZNF772	ENSG00000197128	zf-C2H2	ENSP00000395967;ENSP00000348992;ENSP00000480278;ENSP00000341165;ENSP00000477730;	400720
Homo_sapiens	ZBTB16	ENSG00000109906	ZBTB	ENSP00000376721;ENSP00000376721;ENSP00000338157;ENSP00000338157;	7704
Homo_sapiens	ZNF575	ENSG00000176472	zf-C2H2	ENSP00000472578;ENSP00000471083;ENSP00000315870;ENSP00000413956;	284346
Homo_sapiens	ZNF620	ENSG00000177842	zf-C2H2	ENSP00000322265;ENSP00000391472;	253639
Homo_sapiens	ZNF761	ENSG00000160336	zf-C2H2	ENSP00000481272;ENSP00000480218;	388561
Homo_sapiens	ZNF793	ENSG00000188227	zf-C2H2	ENSP00000487183;ENSP00000444355;ENSP00000468605;ENSP00000396402;	390927
Homo_sapiens	ZNF254	ENSG00000213096	zf-C2H2	ENSP00000349494;ENSP00000483222;ENSP00000484930;ENSP00000482703;	9534
Homo_sapiens	TFAP2B	ENSG00000008196	AP-2	ENSP00000377265;	7021
Homo_sapiens	SNAPC4	ENSG00000165684	MYB	ENSP00000298532;ENSP00000490037;	6621
Homo_sapiens	ZNF675	ENSG00000197372	zf-C2H2	ENSP00000352836;	171392
Homo_sapiens	ZNF860	ENSG00000197385	zf-C2H2	ENSP00000373274;	344787
Homo_sapiens	FOXD3	ENSG00000187140	Fork_head	ENSP00000360157;	27022
Homo_sapiens	ZNF132	ENSG00000131849	zf-C2H2	ENSP00000254166;ENSP00000491571;	7691
Homo_sapiens	NFE2L3	ENSG00000050344	TF_bZIP	ENSP00000056233;	9603
Homo_sapiens	ZNF510	ENSG00000081386	zf-C2H2	ENSP00000223428;ENSP00000364379;	22869
Homo_sapiens	HOXC6	ENSG00000197757	Homeobox	ENSP00000243108;ENSP00000377864;	3223
Homo_sapiens	THRB	ENSG00000151090	THR-like	ENSP00000493709;ENSP00000414100;ENSP00000379904;ENSP00000496686;ENSP00000496095;ENSP00000348827;ENSP00000496509;ENSP00000494618;ENSP00000280696;ENSP00000496029;ENSP00000404898;ENSP00000496616;ENSP00000414444;	7068
Homo_sapiens	ZNF774	ENSG00000196391	zf-C2H2	ENSP00000346348;	342132
Homo_sapiens	ZFP28	ENSG00000196867	zf-C2H2	ENSP00000301318;	140612
Homo_sapiens	NFE2L1	ENSG00000082641	TF_bZIP	ENSP00000464446;ENSP00000463291;ENSP00000461960;ENSP00000445811;ENSP00000355190;ENSP00000354855;ENSP00000350072;	4779
Homo_sapiens	HOXD4	ENSG00000170166	Homeobox	ENSP00000302548;	3233
Homo_sapiens	ZNF681	ENSG00000196172	zf-C2H2	ENSP00000384000;ENSP00000433806;	148213
Homo_sapiens	NFIL3	ENSG00000165030	TF_bZIP	ENSP00000297689;	4783
Homo_sapiens	FOXP3	ENSG00000049768	Fork_head	ENSP00000365380;ENSP00000365372;ENSP00000428952;ENSP00000451208;ENSP00000396415;ENSP00000365369;	50943
Homo_sapiens	CUX2	ENSG00000111249	CUT	ENSP00000261726;	23316
Homo_sapiens	CREB3	ENSG00000107175	TF_bZIP	ENSP00000342136;	10488
Homo_sapiens	ARNT2	ENSG00000172379	bHLH	ENSP00000453792;ENSP00000307479;ENSP00000453651;ENSP00000479393;	9915
Homo_sapiens	MTA3	ENSG00000057935	zf-GATA	ENSP00000385045;ENSP00000385823;ENSP00000384249;ENSP00000383973;ENSP00000391455;ENSP00000386763;ENSP00000385241;	57504
Homo_sapiens	AEBP2	ENSG00000139154	zf-C2H2	ENSP00000354267;ENSP00000381840;ENSP00000437983;ENSP00000444255;ENSP00000266508;	121536
Homo_sapiens	TEAD4	ENSG00000197905	TEA	ENSP00000444528;ENSP00000352926;ENSP00000438453;ENSP00000351184;ENSP00000411475;	7004
Homo_sapiens	ZNF250	ENSG00000196150	zf-C2H2	ENSP00000292579;ENSP00000393442;	58500
Homo_sapiens	FOXD2	ENSG00000186564	Fork_head	ENSP00000335493;	2306
Homo_sapiens	JAZF1	ENSG00000153814	zf-C2H2	ENSP00000283928;	221895
Homo_sapiens	MYRFL	ENSG00000166268	NDT80/PhoG	ENSP00000449598;ENSP00000448753;	196446
Homo_sapiens	THAP1	ENSG00000131931	THAP	ENSP00000254250;ENSP00000433912;	55145
Homo_sapiens	ZNF578	ENSG00000258405	zf-C2H2	ENSP00000459216;	147660
Homo_sapiens	ZNF461	ENSG00000197808	zf-C2H2	ENSP00000479057;ENSP00000467931;ENSP00000479585;ENSP00000353515;	92283
Homo_sapiens	IKZF3	ENSG00000161405	zf-C2H2	ENSP00000420463;ENSP00000341977;ENSP00000462791;ENSP00000367194;ENSP00000345622;ENSP00000344544;ENSP00000403776;ENSP00000367179;ENSP00000438972;ENSP00000463505;ENSP00000344471;	22806
Homo_sapiens	FOXJ2	ENSG00000065970	Fork_head	ENSP00000403411;ENSP00000162391;	55810
Homo_sapiens	AC187653.1	ENSG00000248767	Fork_head	ENSP00000492766;	100288524
Homo_sapiens	ZNF788	ENSG00000214189	zf-C2H2	ENSP00000380866;	-
Homo_sapiens	ZNF708	ENSG00000182141	zf-C2H2	ENSP00000469961;ENSP00000349401;	7562
Homo_sapiens	TERB1	ENSG00000249961	MYB	ENSP00000462883;ENSP00000463762;	283847
Homo_sapiens	ZFP92	ENSG00000189420	zf-C2H2	ENSP00000462054;	139735
Homo_sapiens	IRF8	ENSG00000140968	IRF	ENSP00000455784;ENSP00000456992;ENSP00000455048;ENSP00000268638;ENSP00000458047;ENSP00000455816;	3394
Homo_sapiens	ZNF705D	ENSG00000215343	zf-C2H2	ENSP00000445477;ENSP00000382957;	728957
Homo_sapiens	MXD3	ENSG00000213347	bHLH	ENSP00000425029;ENSP00000389716;ENSP00000416921;ENSP00000421463;ENSP00000401867;	83463
Homo_sapiens	ZNF506	ENSG00000081665	zf-C2H2	ENSP00000440625;ENSP00000468150;ENSP00000468206;ENSP00000408892;ENSP00000393835;	440515
Homo_sapiens	RHOXF2	ENSG00000131721	Homeobox	ENSP00000360441;	84528
Homo_sapiens	NHLH2	ENSG00000177551	bHLH	ENSP00000322087;ENSP00000358519;ENSP00000405062;	4808
Homo_sapiens	STAT5B	ENSG00000173757	STAT	ENSP00000293328;	6777
Homo_sapiens	ZNF490	ENSG00000188033	zf-C2H2	ENSP00000311521;ENSP00000404112;	57474
Homo_sapiens	ZNF516	ENSG00000101493	zf-C2H2	ENSP00000478712;ENSP00000446211;ENSP00000394757;	9658
Homo_sapiens	NFKB2	ENSG00000077150	RHD	ENSP00000410256;ENSP00000471586;ENSP00000358983;ENSP00000189444;	4791
Homo_sapiens	ZNF99	ENSG00000213973	zf-C2H2	ENSP00000380293;ENSP00000472969;	7652
Homo_sapiens	ESR1	ENSG00000091831	ESR-like	ENSP00000384064;ENSP00000401995;ENSP00000342630;ENSP00000394721;ENSP00000206249;ENSP00000405330;ENSP00000387500;	2099
Homo_sapiens	DMRTA2	ENSG00000142700	DM	ENSP00000383909;ENSP00000399370;	63950
Homo_sapiens	INSM1	ENSG00000173404	zf-C2H2	ENSP00000312631;	3642
Homo_sapiens	SOX5	ENSG00000134532	HMG	ENSP00000439832;ENSP00000398273;ENSP00000443520;ENSP00000441973;ENSP00000379328;ENSP00000370788;ENSP00000493866;ENSP00000437487;	6660
Homo_sapiens	TBX18	ENSG00000112837	T-box	ENSP00000358677;ENSP00000475498;ENSP00000476137;ENSP00000475873;	9096
Homo_sapiens	HNF4G	ENSG00000164749	RXR-like	ENSP00000346339;ENSP00000379701;	3174
Homo_sapiens	ATF1	ENSG00000123268	TF_bZIP	ENSP00000262053;	466
Homo_sapiens	SCRT2	ENSG00000215397	zf-C2H2	ENSP00000246104;	85508
Homo_sapiens	NKX1-2	ENSG00000229544	Homeobox	ENSP00000451945;	390010
Homo_sapiens	ZNF384	ENSG00000126746	zf-C2H2	ENSP00000473311;ENSP00000354592;ENSP00000348018;ENSP00000412911;ENSP00000321650;ENSP00000399572;ENSP00000380019;	171017
Homo_sapiens	PLAGL2	ENSG00000126003	zf-C2H2	ENSP00000246229;	5326
Homo_sapiens	POU4F2	ENSG00000151615	Pou	ENSP00000281321;	5458
Homo_sapiens	NANOG	ENSG00000111704	Homeobox	ENSP00000435288;ENSP00000444434;ENSP00000229307;	79923
Homo_sapiens	ZNF81	ENSG00000197779	zf-C2H2	ENSP00000341151;ENSP00000366153;	347344
Homo_sapiens	ZNF497	ENSG00000174586	zf-C2H2	ENSP00000311183;ENSP00000402815;	162968
Homo_sapiens	NR0B2	ENSG00000131910	Miscellaneous	ENSP00000254227;	8431
Homo_sapiens	AC010487.3	ENSG00000283088	zf-C2H2	ENSP00000489045;	-
Homo_sapiens	AC004080.3	ENSG00000257184	Homeobox	ENSP00000421799;	-
Homo_sapiens	ZNF135	ENSG00000176293	zf-C2H2	ENSP00000321406;ENSP00000369437;ENSP00000427691;ENSP00000441410;ENSP00000422074;	7694
Homo_sapiens	RELB	ENSG00000104856	RHD	ENSP00000423287;ENSP00000221452;ENSP00000485826;	5971
Homo_sapiens	GTF2IRD1	ENSG00000006704	GTF2I	ENSP00000265755;ENSP00000417909;ENSP00000418383;ENSP00000397566;ENSP00000408477;	9569
Homo_sapiens	CUX1	ENSG00000257923	CUT	ENSP00000451558;ENSP00000446630;ENSP00000292535;ENSP00000447373;ENSP00000496653;ENSP00000450125;ENSP00000353401;ENSP00000494610;	1523
Homo_sapiens	ZNF207	ENSG00000010244	Others	-	7756
Homo_sapiens	LTF	ENSG00000012223	Others	-	4057
Homo_sapiens	PRDM11	ENSG00000019485	Others	-	56981
Homo_sapiens	BCLAF1	ENSG00000029363	Others	-	9774
Homo_sapiens	TFB1M	ENSG00000029639	Others	-	51106
Homo_sapiens	ZNF280C	ENSG00000056277	Others	-	55609
Homo_sapiens	PARP12	ENSG00000059378	Others	-	64761
Homo_sapiens	GPBP1	ENSG00000062194	Others	-	65056
Homo_sapiens	RFXANK	ENSG00000064490	Others	-	8625
Homo_sapiens	MLLT10	ENSG00000078403	Others	-	8028
Homo_sapiens	KHSRP	ENSG00000088247	Others	-	8570
Homo_sapiens	HIF1A	ENSG00000100644	Others	-	3091
Homo_sapiens	ADNP2	ENSG00000101544	Others	-	22850
Homo_sapiens	CENPT	ENSG00000102901	Others	-	80152
Homo_sapiens	CAPN15	ENSG00000103326	Others	-	6650
Homo_sapiens	GABPB1	ENSG00000104064	Others	-	2553
Homo_sapiens	MYEF2	ENSG00000104177	Others	-	50804
Homo_sapiens	TAX1BP1	ENSG00000106052	Others	-	8887
Homo_sapiens	AKNA	ENSG00000106948	Others	-	80709
Homo_sapiens	CREBL2	ENSG00000111269	Others	-	1389
Homo_sapiens	CENPA	ENSG00000115163	Others	-	1058
Homo_sapiens	CEBPZ	ENSG00000115816	Others	-	10153
Homo_sapiens	PLEK	ENSG00000115956	Others	-	5341
Homo_sapiens	EPAS1	ENSG00000116016	Others	-	2034
Homo_sapiens	SFPQ	ENSG00000116560	Others	-	6421
Homo_sapiens	GON4L	ENSG00000116580	Others	-	54856
Homo_sapiens	PHTF1	ENSG00000116793	Others	-	10745
Homo_sapiens	BLZF1	ENSG00000117475	Others	-	8548
Homo_sapiens	ZNF706	ENSG00000120963	Others	-	51123
Homo_sapiens	KIAA1549	ENSG00000122778	Others	-	57670
Homo_sapiens	ZNFX1	ENSG00000124201	Others	-	57169
Homo_sapiens	SLC2A4RG	ENSG00000125520	Others	-	56731
Homo_sapiens	RBCK1	ENSG00000125826	Others	-	10616
Homo_sapiens	YEATS4	ENSG00000127337	Others	-	8089
Homo_sapiens	CASZ1	ENSG00000130940	Others	-	54897
Homo_sapiens	CC2D1A	ENSG00000132024	Others	-	54862
Homo_sapiens	ZNF414	ENSG00000133250	Others	-	84330
Homo_sapiens	XPA	ENSG00000136936	Others	-	7507
Homo_sapiens	TCF19	ENSG00000137310	Others	-	6941
Homo_sapiens	ZNF280D	ENSG00000137871	Others	-	54816
Homo_sapiens	PREB	ENSG00000138073	Others	-	10113
Homo_sapiens	SMARCAL1	ENSG00000138375	Others	-	50485
Homo_sapiens	CARF	ENSG00000138380	Others	-	79800
Homo_sapiens	TCF25	ENSG00000141002	Others	-	22980
Homo_sapiens	ZNF750	ENSG00000141579	Others	-	79755
Homo_sapiens	GABPB2	ENSG00000143458	Others	-	126626
Homo_sapiens	TMF1	ENSG00000144747	Others	-	7110
Homo_sapiens	LYAR	ENSG00000145220	Others	-	55646
Homo_sapiens	PURB	ENSG00000146676	Others	-	5814
Homo_sapiens	CIZ1	ENSG00000148337	Others	-	25792
Homo_sapiens	ANKRD30A	ENSG00000148513	Others	-	91074
Homo_sapiens	THYN1	ENSG00000151500	Others	-	29087
Homo_sapiens	SETBP1	ENSG00000152217	Others	-	26040
Homo_sapiens	AHCTF1	ENSG00000153207	Others	-	25909
Homo_sapiens	ELMSAN1	ENSG00000156030	Others	-	91748
Homo_sapiens	GATAD1	ENSG00000157259	Others	-	57798
Homo_sapiens	SON	ENSG00000159140	Others	-	6651
Homo_sapiens	GPBP1L1	ENSG00000159592	Others	-	60313
Homo_sapiens	ZNF326	ENSG00000162664	Others	-	284695
Homo_sapiens	SPZ1	ENSG00000164299	Others	-	84654
Homo_sapiens	FAM170A	ENSG00000164334	Others	-	340069
Homo_sapiens	CREBRF	ENSG00000164463	Others	-	153222
Homo_sapiens	ZNF704	ENSG00000164684	Others	-	619279
Homo_sapiens	ZNF503	ENSG00000165655	Others	-	84858
Homo_sapiens	RAG1	ENSG00000166349	Others	-	5896
Homo_sapiens	PHB	ENSG00000167085	Others	-	5245
Homo_sapiens	TET2	ENSG00000168769	Others	-	54790
Homo_sapiens	ZNF608	ENSG00000168916	Others	-	57507
Homo_sapiens	ZNF280A	ENSG00000169548	Others	-	129025
Homo_sapiens	CENPX	ENSG00000169689	Others	-	201254
Homo_sapiens	CNBP	ENSG00000169714	Others	-	7555
Homo_sapiens	NFRKB	ENSG00000170322	Others	-	4798
Homo_sapiens	ZNF318	ENSG00000171467	Others	-	24149
Homo_sapiens	PURG	ENSG00000172733	Others	-	29942
Homo_sapiens	CENPS	ENSG00000175279	Others	-	378708
Homo_sapiens	MAF1	ENSG00000179632	Others	-	84232
Homo_sapiens	ZNF609	ENSG00000180357	Others	-	23060
Homo_sapiens	DMRTC1B	ENSG00000184911	Others	-	728656
Homo_sapiens	PURA	ENSG00000185129	Others	-	5813
Homo_sapiens	NKRF	ENSG00000186416	Others	-	55922
Homo_sapiens	ZNF395	ENSG00000186918	Others	-	55893
Homo_sapiens	PLSCR1	ENSG00000188313	Others	-	5359
Homo_sapiens	ZGPAT	ENSG00000197114	Others	-	84619
Homo_sapiens	ZNF720	ENSG00000197302	Others	-	107983990
Homo_sapiens	ZNF511	ENSG00000198546	Others	-	118472
Homo_sapiens	L3MBTL3	ENSG00000198945	Others	-	84456
Homo_sapiens	CPEB1	ENSG00000214575	Others	-	64506
Homo_sapiens	ZNF487	ENSG00000243660	Others	-	642819
Homo_sapiens	NME2	ENSG00000243678	Others	-	4831
Homo_sapiens	ZNF488	ENSG00000265763	Others	-	118738
Homo_sapiens	DMRTC1	ENSG00000269502	Others	-	63947
Homo_sapiens	ZNF280B	ENSG00000275004	Others	-	140883
